# Supplementary material
Source: publisher figshare collection journal article supplement (https://gsajournals.figshare.com/ndownloader/files/30890674)
Supplement: Supplementary file 1 [file 30890674]

## Sheet: Orthogroups
Orthogroup	Abba	Amtr	Gibi	Gnmo	Megl	Pagl	Pama	Pial	Piba	Pice	Picn	Pila	Pima	Pimn	Pipt	Pist	Pita	Pnte	Psme	Thoc	SEGI.2_0.peptides.filtered	SESE.2_1.peptides.filtered.v3
OG0000000	GGJG01000127.1.p1, GGJG01000218.1.p1, GGJG01000241.1.p1, GGJG01001999.1.p1, GGJG01002584.1.p1, GGJG01004404.1.p1, GGJG01005318.1.p1, GGJG01005527.1.p1, GGJG01006609.1.p1, GGJG01009313.1.p1, GGJG01009775.1.p1, GGJG01009876.1.p1, GGJG01010924.1.p1, GGJG01011841.1.p1, GGJG01012047.1.p1, GGJG01012780.1.p2, GGJG01012837.1.p1, GGJG01015179.1.p1, GGJG01016541.1.p1, GGJG01016937.1.p1, GGJG01017518.1.p1, …	evm_27.model.AmTr_v1.0_scaffold00001.316 pacid=31550953 transcript=evm_27.model.AmTr_v1.0_scaffold00001.316 locus=evm_27.TU.AmTr_v1.0_scaffold00001.316 ID=evm_27.model.AmTr_v1.0_scaffold00001.316.v1.0 annot-version=v1.0, evm_27.model.AmTr_v1.0_scaffold00002.581 pacid=31562629 transcript=evm_27.model.AmTr_v1.0_scaffold00002.581 locus=evm_27.TU.AmTr_v1.0_scaffold00002.581 ID=evm_27.model.AmTr_v1.0_…	GBYR01015932.1.p1, GBYR01034466.1.p1, GBYR01034958.1.p1, GBYR01055592.1.p1, GGBW01000039.1.p1, GGBW01000040.1.p1, GGBW01000041.1.p1, GGBW01000042.1.p1, GGBW01000043.1.p1, GGBW01000044.1.p1, GGBW01000045.1.p1, GGBW01000049.1.p1, GGBW01000055.1.p1, GGBW01000056.1.p1, GGBW01000057.1.p1, GGBW01000058.1.p1, GGBW01000059.1.p1, GGBW01000060.1.p1, GGBW01000062.1.p1, GGBW01000065.1.p1, GGBW01000067.1.p1, …	TnS000012775t02, TnS000014621t01, TnS000018517t02, TnS000029905t02, TnS000034031t06, TnS000046261t02, TnS000055399t03, TnS000055737t01, TnS000070897t05, TnS000089107t01, TnS000109587t03, TnS000114139t05, TnS000117879t02, TnS000120821t09, TnS000136509t08, TnS000141159t05, TnS000146041t02, TnS000155601t01, TnS000161755t07, TnS000176469t02, TnS000184097t02, TnS000190345t04, TnS000190931t02, TnS00019…	Megl_c10598_g1_i1.p1, Megl_c12847_g1_i1.p1, Megl_c14325_g1_i1.p1, Megl_c14386_g2_i2.p1, Megl_c14899_g1_i1.p1, Megl_c15970_g2_i2.p1, Megl_c16289_g2_i1.p1, Megl_c16529_g2_i1.p1, Megl_c16554_g1_i2.p1, Megl_c16595_g3_i1.p1, Megl_c17511_g2_i1.p1, Megl_c18414_g1_i1.p1, Megl_c19195_g4_i1.p1, Megl_c19426_g1_i5.p1, Megl_c20012_g3_i2.p1, Megl_c20034_g1_i1.p1, Megl_c20462_g1_i1.p1, Megl_c21018_g1_i1.p1, Meg…	GCHX01047844.1.p1, GCHX01147017.1.p1, GCHX01154613.1.p1, GCHX01250945.1.p1, GCHX01350440.1.p1, GCHX01449510.1.p1, GCZO01000009.1.p1, GCZO01000030.1.p1, GCZO01000058.1.p1, GCZO01000886.1.p1, GCZO01000990.1.p1, GCZO01001092.1.p1, GCZO01001138.1.p1, GCZO01001970.1.p1, GCZO01002503.1.p1, GCZO01003371.1.p1, GCZO01003633.1.p1, GCZO01004850.1.p1, GCZO01005238.1.p1, GCZO01005291.1.p1, GCZO01005462.1.p1, …	GGJJ01000108.1.p1, GGJJ01000207.1.p1, GGJJ01000745.1.p1, GGJJ01001561.1.p1, GGJJ01001628.1.p1, GGJJ01002085.1.p1, GGJJ01002684.1.p1, GGJJ01003059.1.p1, GGJJ01004315.1.p1, GGJJ01004591.1.p1, GGJJ01004971.1.p1, GGJJ01007473.1.p1, GGJJ01009481.1.p1, GGJJ01009919.1.p1, GGJJ01009948.1.p1, GGJJ01010722.1.p1, GGJJ01010997.1.p1, GGJJ01011157.1.p1, GGJJ01011240.1.p1, GGJJ01012080.1.p1, GGJJ01012081.1.p1, …	GDQR01000173.1.p1, GDQR01000269.1.p1, GDQR01000795.1.p1, GDQR01001582.1.p1, GDQR01001648.1.p1, GDQR01001878.1.p1, GDQR01002035.1.p1, GDQR01003484.1.p1, GDQR01003726.1.p1, GDQR01003878.1.p1, GDQR01004483.1.p1, GDQR01004626.1.p1, GDQR01004678.1.p1, GDQR01004894.1.p1, GDQR01004942.1.p1, GDQR01005342.1.p1, GDQR01005518.1.p1, GDQR01005540.1.p1, GDQR01005734.1.p1, GDQR01005791.1.p1, GDQR01005845.1.p1, …	GGJH01002267.1.p1, GGJH01003143.1.p1, GGJH01004609.1.p1, GGJH01005464.1.p1, GGJH01005585.1.p1, GGJH01012789.1.p1, GGJH01013471.1.p1, GGJH01013717.1.p1, GGJH01015543.1.p1, GGJH01015954.1.p1, GGJH01016134.1.p1, GGJH01016533.1.p1, GGJH01016586.1.p1, GGJH01016771.1.p1, GGJH01017147.1.p1, GGJH01017157.1.p1, GGJH01017182.1.p1, GGJH01017373.1.p1, GGJH01017743.1.p1, GGJH01017826.1.p1, GGJH01018021.1.p1, …	HAMI01000012.1.p1, HAMI01000417.1.p1, HAMI01000796.1.p1, HAMI01000950.1.p1, HAMI01000957.1.p1, HAMI01001253.1.p1, HAMI01001682.1.p1, HAMI01002014.1.p1, HAMI01002285.1.p1, HAMI01002587.1.p1, HAMI01002647.1.p1, HAMI01002737.1.p1, HAMI01002804.1.p1, HAMI01002963.1.p1, HAMI01003210.1.p1, HAMI01003213.1.p1, HAMI01003537.1.p1, HAMI01003691.1.p1, HAMI01003702.1.p1, HAMI01003841.1.p1, HAMI01003850.1.p1, …	GBLJ01000109.1.p1, GBLJ01001044.1.p1, GBLJ01001121.1.p1, GBLJ01001432.1.p1, GBLJ01001790.1.p1, GBLJ01001832.1.p1, GBLJ01002346.1.p1, GBLJ01003021.1.p1, GBLJ01003109.1.p1, GBLJ01003702.1.p1, GBLJ01003773.1.p1, GBLJ01003828.1.p1, GBLJ01004250.1.p1, GBLJ01004536.1.p1, GBLJ01004656.1.p1, GBLJ01004763.1.p1, GBLJ01004779.1.p1, GBLJ01005168.1.p1, GBLJ01005265.1.p1, GBLJ01005855.1.p1, GBLJ01005968.1.p1, …	PILA_11580, PILA_19055, PILA_20315, PILA_23147, PILA_25524, PILA_30479, PILA_32046, PILA_34573, PILA_37757, PILA_37992, gb|GEUZ01000698.1|.p1, gb|GEUZ01000776.1|.p1, gb|GEUZ01000821.1|.p1, gb|GEUZ01000972.1|.p1, gb|GEUZ01001001.1|.p1, gb|GEUZ01001150.1|.p1, gb|GEUZ01001236.1|.p1, gb|GEUZ01001318.1|.p1, gb|GEUZ01001326.1|.p1, gb|GEUZ01001345.1|.p1, gb|GEUZ01001410.1|.p1, gb|GEUZ01001419.1|.p1, gb|…	GAQR01000406.1.p2, GAQR01000510.1.p2, GAQR01001176.1.p2, GAQR01002702.1.p1, GAQR01002727.1.p1, GAQR01004069.1.p1, GAQR01005787.1.p1, GAQR01005788.1.p1, GAQR01006261.1.p1, GAQR01006309.1.p1, GAQR01006662.1.p1, GAQR01006798.1.p1, GAQR01006799.1.p2, GAQR01008629.1.p1, GAQR01009261.1.p1, GAQR01009375.1.p1, GAQR01011323.1.p1, GAQR01011710.1.p1, GAQR01012341.1.p1, GAQR01012383.1.p1, GAQR01013158.1.p1, …	GBQX01018633.1.p1, GBQX01022615.1.p1, GBQX01023115.1.p1, GBQX01023275.1.p1, GBQX01027274.1.p1, GBQX01028552.1.p1, GBQX01029672.1.p1, GBQX01031374.1.p1, GBQX01031608.1.p1, GBQX01031798.1.p1, GBQX01031832.1.p1, GBQX01032182.1.p1, GBQX01032862.1.p1, GBQX01033053.1.p1, GBQX01033510.1.p1, GBQX01033577.1.p1, GBQX01034282.1.p1, GBQX01034488.1.p1, GBQX01035300.1.p1, GBQX01035386.1.p1, GBQX01035420.1.p1, …	GECO01004562.1.p1, GECO01005513.1.p1, GECO01009285.1.p1, GECO01009553.1.p1, GECO01010218.1.p1, GECO01010610.1.p1, GECO01010917.1.p1, GECO01011184.1.p1, GECO01012574.1.p1, GECO01012866.1.p1, GECO01012977.1.p1, GECO01013229.1.p1, GECO01013310.1.p1, GECO01013647.1.p1, GECO01013649.1.p1, GECO01013824.1.p1, GECO01013843.1.p1, GECO01013934.1.p1, GECO01013940.1.p1, GECO01013968.1.p1, GECO01014065.1.p1, …	GGJK01002079.1.p1, GGJK01004930.1.p1, GGJK01005039.1.p1, GGJK01009807.1.p1, GGJK01012917.1.p1, GGJK01013814.1.p1, GGJK01014165.1.p1, GGJK01014788.1.p1, GGJK01015086.1.p1, GGJK01015092.1.p1, GGJK01015510.1.p1, GGJK01015564.1.p1, GGJK01015709.1.p1, GGJK01015754.1.p1, GGJK01015782.1.p1, GGJK01015877.1.p1, GGJK01015992.1.p1, GGJK01016048.1.p1, GGJK01016338.1.p1, GGJK01016349.1.p1, GGJK01016353.1.p1, …	1A_I11_VO_L_1_T_123154_226447_1 C_0.000_Length_1967 type=cds; aalen=537_82%_complete; clen=1967; strand=-; offs=1742-129; evgclass=main_okay_match_1A_I11_VO_L_1_T_123166_226447 C_0.000_Length_1484_pct_98_100;, 1A_I11_VO_L_1_T_32263_226447_1 C_0.000_Length_1140 type=cds; aalen=281_74%_complete; clen=1140; strand=-; offs=1135-290; evgclass=main_okay_match_1A_I11_VO_L_1_T_32254_226447 C_0.000_Length…
_VO_L_68843_T_4_13 C_0.529_Length_3521_pct_99_100;, 2A_all_VO_L_1_T_38920_181832_1 C_0.000_Length_3137 type=cds; aalen=598_57%_complete-utrpoor; clen=3137; strand=-; offs=3083-1287; evgclass=main_okay_match_2A_all_VO_L_1_T_83239_181832 C_0.000_Length_1578_pct_99_95;, 2A_all_VO_L_1_T_38961_181832_1 C_0.000_Length_5534 type=cds; aalen=793_43%_complete-utrbad; clen=5534; strand=+; offs=223-2604; evg…
214_Length_4301 type=cds; aalen=1033_72%_complete; clen=4301; strand=-; offs=3633-532; evgclass=main_okay_match_5A_all_VO_L_2_T_89642_409051 C_0.000_Length_4066_pct_99_100;, 3A_all_VO_L_8365_T_44_61_1 C_0.243_Length_3510 type=cds; aalen=851_72%_complete; clen=3510; strand=-; offs=3497-942; evgclass=main_okay_match_3A_all_VO_L_8365_T_59_61 C_0.214_Length_2499_pct_99_99;, 3A_all_VO_L_8520_T_12_13_1…	GFZL01000329.1.p1, GFZL01000566.1.p1, GFZL01000847.1.p1, GFZL01005319.1.p1, GFZL01005369.1.p1, GFZL01005779.1.p1, GFZL01006832.1.p1, GFZL01007300.1.p1, GFZL01008292.1.p1, GFZL01011263.1.p1, GFZL01011401.1.p1, GFZL01011500.1.p1, GFZL01011505.1.p1, GFZL01011510.1.p1, GFZL01011514.1.p1, GFZL01011516.1.p1, GFZL01011519.1.p1, GFZL01011540.1.p1, GFZL01011575.1.p1, GFZL01011593.1.p1, GFZL01011605.1.p1, …	GAZW02002909.1.p1, GAZW02013188.1.p1, GAZW02015006.1.p1, GAZW02018130.1.p1, GAZW02019658.1.p1, GAZW02020187.1.p1, GAZW02030372.1.p1, GAZW02031154.1.p1, GAZW02031155.1.p1, GAZW02031158.1.p1, GAZW02035099.1.p1, GAZW02035997.1.p1, GAZW02038863.1.p1, GAZW02038976.1.p1, GAZW02039115.1.p1, GAZW02039397.1.p1, GAZW02039902.1.p1, GAZW02039973.1.p1, GAZW02040036.1.p1, GAZW02040378.1.p1, GAZW02040760.1.p1, …	Thoc_c1050_g1_i1.p1, Thoc_c11096_g2_i1.p1, Thoc_c12332_g2_i1.p2, Thoc_c13353_g1_i1.p1, Thoc_c15424_g1_i2.p1, Thoc_c17206_g2_i1.p1, Thoc_c17317_g1_i1.p1, Thoc_c17366_g2_i1.p1, Thoc_c17466_g1_i1.p1, Thoc_c17660_g1_i2.p1, Thoc_c18216_g2_i1.p1, Thoc_c18541_g2_i1.p1, Thoc_c19031_g2_i2.p1, Thoc_c19556_g1_i1.p1, Thoc_c19689_g1_i1.p1, Thoc_c20114_g1_i1.p1, Thoc_c20437_g1_i2.p1, Thoc_c20472_g1_i2.p1, Thoc…	SEGI_00329, SEGI_00806, SEGI_01155, SEGI_01238, SEGI_01750, SEGI_01867, SEGI_02701, SEGI_02836, SEGI_03109, SEGI_03153, SEGI_03306, SEGI_03920, SEGI_06449, SEGI_06480, SEGI_06927, SEGI_07456, SEGI_07493, SEGI_07935, SEGI_08086, SEGI_08660, SEGI_09523, SEGI_09692, SEGI_09987, SEGI_10099, SEGI_11463, SEGI_11527, SEGI_11577, SEGI_11619, SEGI_11913, SEGI_12013, SEGI_12029, SEGI_12106, SEGI_12144, SEG…	SESE_000951, SESE_001702, SESE_003179, SESE_004680, SESE_005572, SESE_005889, SESE_007305, SESE_009606, SESE_010109, SESE_016262, SESE_018507, SESE_020648, SESE_021994, SESE_022251, SESE_025555, SESE_028135, SESE_036719, SESE_038005, SESE_038774, SESE_039322, SESE_039860, SESE_041227, SESE_042281, SESE_043528, SESE_045277, SESE_046974, SESE_047357, SESE_048717, SESE_048789, SESE_049117, SESE_0493…
OG0000001	GGJG01000701.1.p1, GGJG01001110.1.p1, GGJG01001300.1.p1, GGJG01001413.1.p1, GGJG01001416.1.p1, GGJG01001654.1.p1, GGJG01002329.1.p1, GGJG01002730.1.p1, GGJG01002834.1.p1, GGJG01002966.1.p1, GGJG01002969.1.p1, GGJG01003225.1.p1, GGJG01003650.1.p1, GGJG01004253.1.p1, GGJG01005261.1.p1, GGJG01010005.1.p1, GGJG01012026.1.p1, GGJG01013048.1.p1, GGJG01013087.1.p1, GGJG01015737.1.p2, GGJG01017555.1.p1, …	evm_27.model.AmTr_v1.0_scaffold00010.351 pacid=31573056 transcript=evm_27.model.AmTr_v1.0_scaffold00010.351 locus=evm_27.TU.AmTr_v1.0_scaffold00010.351 ID=evm_27.model.AmTr_v1.0_scaffold00010.351.v1.0 annot-version=v1.0, evm_27.model.AmTr_v1.0_scaffold00044.95 pacid=31575516 transcript=evm_27.model.AmTr_v1.0_scaffold00044.95 locus=evm_27.TU.AmTr_v1.0_scaffold00044.95 ID=evm_27.model.AmTr_v1.0_sca…	GBYR01009417.1.p1, GBYR01014534.1.p1, GBYR01016682.1.p1, GBYR01018602.1.p1, GBYR01033293.1.p1, GBYR01039672.1.p1, GGBW01001956.1.p1, GGBW01001960.1.p1, GGBW01002728.1.p1, GGBW01010774.1.p1, GGBW01010783.1.p1, GGBW01018606.1.p1, GGBW01029521.1.p1, GGBW01046396.1.p1, GGBW01053265.1.p1, GGBW01077677.1.p1, GHLL01152448.1.p1, GHLL01160114.1.p1, GHLL01164418.1.p1, GHLL01195981.1.p1, GHLL01205844.1.p1, …	TnS000206553t03, TnS000408531t02, TnS000574365t01, TnS000662983t02, TnS000953265t01, TnS000996543t08, TnS000996543t13, TnS000996543t14	Megl_c14311_g1_i2.p1, Megl_c15509_g2_i1.p1, Megl_c21836_g3_i1.p1, Megl_c26768_g1_i2.p1, Megl_c27513_g2_i1.p2, Megl_c27984_g1_i1.p1, Megl_c28082_g3_i2.p1, Megl_c28082_g3_i4.p2, Megl_c28165_g4_i2.p1, Megl_c28193_g9_i1.p1, Megl_c28232_g4_i1.p1, Megl_c28232_g4_i10.p1, Megl_c28352_g1_i1.p1, Megl_c28352_g1_i2.p1, Megl_c28352_g1_i3.p1, Megl_c28352_g2_i3.p1, Megl_c28352_g3_i2.p1, Megl_c28361_g1_i1.p1, Me…	GCHX01048533.1.p1, GCHX01050221.1.p1, GCHX01052070.1.p1, GCHX01052812.1.p1, GCHX01145240.1.p1, GCHX01145244.1.p1, GCHX01146107.1.p1, GCHX01147848.1.p1, GCHX01151463.1.p1, GCHX01151980.1.p1, GCHX01152760.1.p1, GCHX01153166.1.p1, GCHX01245834.1.p1, GCHX01246933.1.p1, GCHX01248930.1.p1, GCHX01251608.1.p1, GCHX01253184.1.p1, GCHX01345492.1.p1, GCHX01348883.1.p1, GCHX01351717.1.p1, GCHX01353064.1.p1, …	GGJJ01000748.1.p1, GGJJ01000785.1.p1, GGJJ01001192.1.p1, GGJJ01001336.1.p1, GGJJ01001450.1.p1, GGJJ01001676.1.p1, GGJJ01001838.1.p1, GGJJ01002397.1.p1, GGJJ01002486.1.p1, GGJJ01002803.1.p1, GGJJ01002829.1.p1, GGJJ01002932.1.p1, GGJJ01003535.1.p1, GGJJ01004067.1.p1, GGJJ01004526.1.p1, GGJJ01005079.1.p1, GGJJ01005595.1.p1, GGJJ01007426.1.p1, GGJJ01007964.1.p1, GGJJ01008521.1.p1, GGJJ01008889.1.p1, …	GDQR01000094.1.p1, GDQR01000182.1.p1, GDQR01000522.1.p1, GDQR01002163.1.p1, GDQR01002388.1.p1, GDQR01002495.1.p1, GDQR01003260.1.p1, GDQR01003359.1.p1, GDQR01003650.1.p1, GDQR01004398.1.p1, GDQR01005096.1.p1, GDQR01005333.1.p1, GDQR01005962.1.p1, GDQR01006347.1.p1, GDQR01008415.1.p1, GDQR01009843.1.p1, GDQR01010333.1.p1, GDQR01010409.1.p1, GDQR01010744.1.p1, GDQR01011285.1.p1, GDQR01011444.1.p1, …	GGJH01001698.1.p1, GGJH01002007.1.p1, GGJH01002206.1.p1, GGJH01002210.1.p1, GGJH01002543.1.p1, GGJH01002561.1.p1, GGJH01002588.1.p1, GGJH01002589.1.p1, GGJH01003510.1.p1, GGJH01003511.1.p1, GGJH01004397.1.p1, GGJH01005261.1.p1, GGJH01005274.1.p1, GGJH01006980.1.p1, GGJH01007188.1.p1, GGJH01007639.1.p2, GGJH01008284.1.p1, GGJH01008572.1.p1, GGJH01011239.1.p1, GGJH01011267.1.p1, GGJH01011706.1.p1, …	HAMI01000083.1.p1, HAMI01000584.1.p1, HAMI01000754.1.p1, HAMI01000954.1.p1, HAMI01001020.1.p1, HAMI01001139.1.p1, HAMI01001384.1.p1, HAMI01001439.1.p1, HAMI01002101.1.p1, HAMI01002203.1.p1, HAMI01002389.1.p1, HAMI01002411.1.p1, HAMI01002590.1.p1, HAMI01002704.1.p1, HAMI01003628.1.p1, HAMI01003642.1.p1, HAMI01003739.1.p1, HAMI01003975.1.p1, HAMI01004147.1.p1, HAMI01004190.1.p1, HAMI01004218.1.p1, …	GBLJ01000377.1.p1, GBLJ01000475.1.p1, GBLJ01000478.1.p1, GBLJ01000546.1.p1, GBLJ01000745.1.p1, GBLJ01000826.1.p1, GBLJ01000841.1.p1, GBLJ01000909.1.p1, GBLJ01001031.1.p1, GBLJ01001369.1.p1, GBLJ01001499.1.p1, GBLJ01001514.1.p1, GBLJ01002039.1.p1, GBLJ01002850.1.p1, GBLJ01003067.1.p1, GBLJ01003107.1.p1, GBLJ01004233.1.p1, GBLJ01004335.1.p1, GBLJ01004346.1.p1, GBLJ01004386.1.p1, GBLJ01004540.1.p1, …	PILA_00029, PILA_00063, PILA_00191, PILA_00244, PILA_00577, PILA_00791, PILA_00926, PILA_01089, PILA_01177, PILA_01208, PILA_01846, PILA_02901, PILA_03085, PILA_03305, PILA_03337, PILA_03405, PILA_03690, PILA_03695, PILA_03887, PILA_03991, PILA_04369, PILA_04370, PILA_04388, PILA_04415, PILA_04465, PILA_04494, PILA_04554, PILA_04895, PILA_05165, PILA_05168, PILA_05170, PILA_05230, PILA_05231, PIL…	GAQR01000530.1.p2, GAQR01001800.1.p2, GAQR01002383.1.p2, GAQR01002772.1.p2, GAQR01003992.1.p1, GAQR01006030.1.p1, GAQR01008317.1.p1, GAQR01009920.1.p4, GAQR01010330.1.p1, GAQR01013168.1.p1, GAQR01016232.1.p1, GAQR01016374.1.p1, GAQR01017389.1.p1, GAQR01025103.1.p1, GAQR01025532.1.p1, GAQR01029946.1.p1, GAQR01034229.1.p1, GAQR01035779.1.p1, GAQR01035915.1.p1, GAQR01035916.1.p1, GAQR01037618.1.p1, …	GBQX01016262.1.p1, GBQX01020812.1.p1, GBQX01022295.1.p1, GBQX01024434.1.p1, GBQX01024800.1.p1, GBQX01026023.1.p1, GBQX01026620.1.p1, GBQX01029010.1.p1, GBQX01030609.1.p1, GBQX01030859.1.p1, GBQX01031438.1.p1, GBQX01032421.1.p1, GBQX01033472.1.p1, GBQX01035476.1.p1, GBQX01035705.1.p2, GBQX01035748.1.p1, GBQX01036261.1.p1, GBQX01036393.1.p1, GBQX01037013.1.p1, GBQX01037981.1.p1, GBQX01039265.1.p1, …	GECO01003637.1.p1, GECO01003705.1.p1, GECO01004102.1.p1, GECO01004218.1.p1, GECO01004429.1.p1, GECO01004982.1.p1, GECO01005252.1.p1, GECO01005707.1.p1, GECO01005721.1.p1, GECO01005741.1.p1, GECO01005756.1.p1, GECO01010205.1.p1, GECO01010270.1.p1, GECO01010525.1.p1, GECO01010555.1.p1, GECO01010716.1.p1, GECO01010975.1.p1, GECO01011056.1.p1, GECO01011111.1.p1, GECO01011134.1.p1, GECO01011160.1.p1, …	GGJK01000449.1.p1, GGJK01001127.1.p1, GGJK01001566.1.p1, GGJK01002020.1.p1, GGJK01002326.1.p1, GGJK01002345.1.p1, GGJK01003209.1.p1, GGJK01004343.1.p1, GGJK01004755.1.p1, GGJK01006276.1.p1, GGJK01006620.1.p1, GGJK01006857.1.p1, GGJK01008778.1.p1, GGJK01009569.1.p1, GGJK01009817.1.p1, GGJK01010090.1.p1, GGJK01010471.1.p1, GGJK01010478.1.p1, GGJK01011166.1.p1, GGJK01011207.1.p1, GGJK01011493.1.p1, …	1A_I11_NT_comp50411_c1_seq8_1 type=cds; aalen=1098_86%_complete; clen=3790; strand=-; offs=3713-417; evgclass=main_okay_match_5A_I15_NT_comp31135_c0_seq16_pct_99_97;, 1A_I11_VO_L_13349_T_49_60_1 C_0.235_Length_3169 type=cds; aalen=791_74%_complete; clen=3169; strand=+; offs=269-2644; evgclass=main_okay_match_6A_all_VO_L_7706_T_67_91 C_0.410_Length_3320_pct_98_91;, 1A_I11_VO_L_1_T_131742_226447_1 …
1930_pct_100_99;, 5A_I14_VO_L_3_T_12680_18503_1 C_0.002_Length_1714 type=cds; aalen=476_83%_complete; clen=1714; strand=-; offs=1578-148; evgclass=main_okay_match_5A_I14_VO_L_3_T_12677_18503 C_0.001_Length_898_pct_99_100;, 5A_I14_VO_L_3_T_7595_18503_1 C_0.001_Length_1039 type=cds; aalen=192_55%_complete-utrpoor; clen=1039; strand=-; offs=949-371; evgclass=main_okay_match_5A_I14_VO_L_3_T_7556_1850…	GFZL01000365.1.p1, GFZL01001069.1.p1, GFZL01009431.1.p1, GFZL01009434.1.p1, GFZL01009481.1.p1, GFZL01009788.1.p1, GFZL01011695.1.p2, GFZL01011792.1.p1, GFZL01011946.1.p1, GFZL01011972.1.p1, GFZL01012002.1.p1, GFZL01012138.1.p1, GFZL01012581.1.p1, GFZL01013086.1.p1, GFZL01014383.1.p1, GFZL01014618.1.p1, GFZL01014623.1.p1, GFZL01014710.1.p1, GFZL01014773.1.p1, GFZL01014778.1.p1, GFZL01014803.1.p1, …	GAZW02002186.1.p1, GAZW02004061.1.p1, GAZW02016083.1.p1, GAZW02016877.1.p1, GAZW02023400.1.p1, GAZW02023401.1.p1, GAZW02023572.1.p1, GAZW02023689.1.p1, GAZW02028363.1.p1, GAZW02033638.1.p1, GAZW02036763.1.p1, GAZW02038896.1.p1, GAZW02038898.1.p1, GAZW02042004.1.p1, GAZW02042007.1.p1, GAZW02042011.1.p1, GAZW02042560.1.p1, GAZW02045946.1.p1, GAZW02045947.1.p1, GAZW02045948.1.p1, GAZW02045949.1.p1, …	Thoc_c1451_g1_i2.p1, Thoc_c15220_g1_i1.p1, Thoc_c15549_g1_i1.p2, Thoc_c16701_g2_i2.p1, Thoc_c18779_g2_i1.p1, Thoc_c19063_g1_i1.p1, Thoc_c21623_g1_i1.p2, Thoc_c21623_g1_i1.p3, Thoc_c23319_g1_i1.p2, Thoc_c23898_g1_i1.p1, Thoc_c23898_g1_i1.p2, Thoc_c23898_g2_i2.p1, Thoc_c24751_g1_i1.p1, Thoc_c24751_g3_i1.p1, Thoc_c24751_g4_i1.p1, Thoc_c24875_g1_i1.p2, Thoc_c25754_g4_i2.p1, Thoc_c26966_g1_i1.p1, Thoc…	SEGI_00214, SEGI_00439, SEGI_01151, SEGI_01349, SEGI_01862, SEGI_01917, SEGI_01921, SEGI_02178, SEGI_02187, SEGI_02715, SEGI_02767, SEGI_03034, SEGI_03132, SEGI_04102, SEGI_04126, SEGI_04356, SEGI_04723, SEGI_04949, SEGI_05134, SEGI_05190, SEGI_05545, SEGI_05688, SEGI_05813, SEGI_05926, SEGI_06268, SEGI_06555, SEGI_07075, SEGI_07211, SEGI_07647, SEGI_07857, SEGI_08698, SEGI_08886, SEGI_08970, SEG…	SESE_000739, SESE_002179, SESE_002466, SESE_015245, SESE_016090, SESE_019034, SESE_023879, SESE_025872, SESE_025942, SESE_025943, SESE_026280, SESE_026874, SESE_027114, SESE_027311, SESE_028353, SESE_029122, SESE_029905, SESE_030826, SESE_031163, SESE_031386, SESE_032520, SESE_033715, SESE_033881, SESE_036439, SESE_037263, SESE_037865, SESE_039052, SESE_039185, SESE_039508, SESE_039783, SESE_0399…
OG0000002	GGJG01025562.1.p1, GGJG01027437.1.p1, GGJG01028615.1.p1, GGJG01030272.1.p1, GGJG01030839.1.p1, GGJG01030845.1.p1, GGJG01031651.1.p1, GGJG01033201.1.p1, GGJG01033939.1.p1, GGJG01036301.1.p1, GGJG01039291.1.p1, GGJG01039518.1.p1, GGJG01040929.1.p2, GGJG01040992.1.p1, GGJG01041753.1.p1, GGJG01044698.1.p1		GBYR01044555.1.p1, GGBW01018379.1.p2, GHLL01047549.1.p1, GHLL01059043.1.p1, GHLL01073072.1.p1, GHLL01127789.1.p1, GHLL01156657.1.p1, GHLL01158857.1.p1, GHLL01173390.1.p1, GHLL01202273.1.p2, GHLL01253599.1.p1, GHLL01270724.1.p1, GHLL01299707.1.p1, GHLL01374662.1.p1, GHLL01374979.1.p1, GHLL01448694.1.p1, GHLL01512549.1.p2, GHLL01515391.1.p1, GHLL01672155.1.p1, GHLL01673437.1.p1, Gb_03683, Gb_23311,…		Megl_c11337_g1_i1.p2, Megl_c27400_g1_i1.p1	GCHX01352025.1.p2, GCHX01352602.1.p1, GCHX01353739.1.p2, GCHX01448793.1.p1, GCHX01450212.1.p1, GCZO01001749.1.p1, GCZO01009691.1.p1, GCZO01103899.1.p1, GCZO01105520.1.p1, GCZO01109261.1.p1, GCZO01209831.1.p1, gb|GFBZ01006016.1|.p1, gb|GFBZ01006759.1|.p1, gb|GFBZ01010573.1|.p1, gb|GFBZ01014394.1|.p1, gb|GFBZ01015782.1|.p1, gb|GFBZ01016651.1|.p1, gb|GFBZ01019709.1|.p1, gb|GFBZ01021078.1|.p1, gb|GFB…	GGJJ01024984.1.p1, GGJJ01030000.1.p1, GGJJ01049515.1.p1	GDQR01000779.1.p1, GDQR01001129.1.p1, GDQR01004121.1.p1, GDQR01008073.1.p1, GDQR01016253.1.p1, GFLL01000938.1.p1, GFLL01002250.1.p1, GFLL01003814.1.p1, GFLL01004449.1.p1, GFLL01006992.1.p1, GFLL01011178.1.p1, GFLL01015345.1.p1, GFLL01018618.1.p1, GFLL01019714.1.p1, GFLL01020197.1.p1, GFLL01024791.1.p1, GFLL01025808.1.p1, GFLL01030063.1.p1, GFLL01037820.1.p2, GFLL01044224.1.p1, GFLL01044441.1.p1, …	GGJH01013982.1.p1, GGJH01014888.1.p1, GGJH01016729.1.p1, GGJH01019553.1.p1, GGJH01036953.1.p1	HAMI01002955.1.p1, HAMI01003948.1.p1, HAMI01005880.1.p1, HAMI01006089.1.p1, HAMI01006874.1.p1, HAMI01007719.1.p2, HAMI01008916.1.p1, HAMI01011402.1.p1, HAMI01012666.1.p1, HAMI01014401.1.p1, HAMI01015821.1.p1, HAMI01021476.1.p1, HAMI01026441.1.p1, HAMI01034928.1.p2	GBLJ01000103.1.p1, GBLJ01000151.1.p1, GBLJ01003840.1.p1, GBLJ01005154.1.p1, GBLJ01006738.1.p1, GBLJ01009105.1.p1, GBLJ01011261.1.p1, GBLJ01014292.1.p1, GBLJ01015618.1.p1, GBLJ01017371.1.p1, GBLJ01020085.1.p1, GBLJ01022231.1.p1, GBLJ01030900.1.p1, GBLJ01035265.1.p1, GBLJ01035970.1.p1, GBLJ01038005.1.p1, GBLJ01044975.1.p1, GBLJ01045797.1.p1, GBLJ01046773.1.p1, gb|GESU01039256.1|.p1	PILA_01752, PILA_03050, PILA_03105, PILA_06532, PILA_11708, PILA_12302, PILA_12418, PILA_13656, PILA_13728, PILA_32801, PILA_34586, gb|GEUZ01004090.1|.p1, gb|GEUZ01007463.1|.p1, gb|GEUZ01009808.1|.p1, gb|GEUZ01009904.1|.p1, gb|GEUZ01010437.1|.p1, gb|GEUZ01012701.1|.p1, gb|GEUZ01012804.1|.p1, gb|GEUZ01013020.1|.p1, gb|GEUZ01013876.1|.p1, gb|GEUZ01015201.1|.p1, gb|GEUZ01015479.1|.p2, gb|GEUZ0101553…	GAQR01009091.1.p1, GAQR01010624.1.p2, GAQR01013106.1.p1, GAQR01013107.1.p1, GAQR01013801.1.p1, GFHB01004514.1.p1, GFHB01007696.1.p1, GFHB01011459.1.p1, GFHB01012414.1.p1, GFHB01020671.1.p1, GFHB01023443.1.p1, GFHB01025027.1.p1, GFHB01031803.1.p1, GFHB01033569.1.p1, GFHB01034504.1.p2, GFHB01036478.1.p1, GFHB01037779.1.p1, GFHB01046964.1.p1, GFHB01051237.1.p1, GFHB01076287.1.p1, GFHB01077758.1.p1, …	GBQX01022325.1.p2, GBQX01031808.1.p1, GBQX01031984.1.p1, GBQX01036646.1.p1, GBQX01036829.1.p1, GBQX01037665.1.p1, GBQX01040192.1.p2, GBQX01040708.1.p1, GBQX01041531.1.p1, GBQX01045170.1.p1, GBQX01045988.1.p2, GBQX01046771.1.p1, GBQX01048164.1.p1, GBQX01048920.1.p1, GBQX01049854.1.p3, GBQX01053065.1.p1	GECO01000019.1.p1, GECO01000719.1.p1, GECO01001616.1.p1, GECO01003202.1.p1, GECO01004512.1.p1, GECO01004739.1.p1, GECO01004848.1.p1, GECO01006633.1.p1, GECO01007033.1.p1, GECO01011477.1.p1, GECO01013284.1.p1, GECO01014403.1.p1, GECO01017131.1.p1, GECO01019810.1.p1, GECO01021973.1.p1, GECO01023271.1.p1, GECO01023844.1.p2, GECO01024167.1.p1, GECO01024466.1.p1, GECO01026084.1.p1, GECO01028270.1.p1, …	GGJK01018584.1.p1, GGJK01020595.1.p1, GGJK01023278.1.p2, GGJK01024949.1.p1, GGJK01025654.1.p1, GGJK01031145.1.p1, GGJK01031910.1.p1, GGJK01032361.1.p1, GGJK01033166.1.p1, GGJK01039749.1.p1, GGJK01042507.1.p1, GGJK01043508.1.p1	1A_I11_VO_L_1_T_131656_226447_1 C_0.000_Length_1299 type=cds; aalen=337_78%_complete; clen=1299; strand=-; offs=1182-169; evgclass=main_okay_match_1A_I11_VO_L_1_T_131633_226447 C_0.000_Length_1094_pct_100_70;, 1A_I3_VO_L_1_T_129886_136734_1 C_0.000_Length_1176 type=cds; aalen=215_55%_complete-utrpoor; clen=1176; strand=+; offs=507-1154; evgclass=main_okay_match_1A_I3_VO_L_1_T_129895_136734 C_0.00…	GFZL01005566.1.p2, GFZL01008544.1.p1, GFZL01009394.1.p1, GFZL01010820.1.p1, GFZL01011253.1.p1, GFZL01012091.1.p1, GFZL01013543.1.p1, GFZL01014022.1.p1, GFZL01014605.1.p1, GFZL01015360.1.p1, GFZL01015537.1.p1, GFZL01015758.1.p1, GFZL01017449.1.p1, GFZL01018647.1.p1, GFZL01019006.1.p1, GFZL01019211.1.p1, GFZL01021892.1.p1, GFZL01023529.1.p1, GFZL01023916.1.p1, GFZL01024418.1.p1, GFZL01024956.1.p1, …	GAZW02004332.1.p1, GAZW02004402.1.p1, GAZW02006644.1.p1, GAZW02007872.1.p1, GAZW02009111.1.p1, GAZW02011132.1.p1, GAZW02012648.1.p2, GAZW02014866.1.p1, GAZW02019735.1.p1, GAZW02026073.1.p2, GAZW02026827.1.p1, GAZW02037551.1.p1, GAZW02044137.1.p1, GAZW02056501.1.p1, GAZW02057552.1.p1, GAZW02060425.1.p1, GAZW02060427.1.p1, GAZW02060432.1.p1, GAZW02067365.1.p1, GAZW02075536.1.p1, GAZW02083212.1.p1, …	Thoc_c47628_g1_i1.p1, Thoc_c47683_g1_i1.p1, Thoc_c7922_g1_i1.p1	SEGI_00172, SEGI_00589, SEGI_00742, SEGI_00804, SEGI_01250, SEGI_01474, SEGI_01795, SEGI_01902, SEGI_02659, SEGI_02982, SEGI_03760, SEGI_04374, SEGI_04648, SEGI_05488, SEGI_05678, SEGI_05837, SEGI_05994, SEGI_06075, SEGI_06137, SEGI_06551, SEGI_06741, SEGI_07213, SEGI_07509, SEGI_07681, SEGI_08324, SEGI_08605, SEGI_10312, SEGI_10514, SEGI_10683, SEGI_12099, SEGI_12459, SEGI_12772, SEGI_13394, SEG…	SESE_025565, SESE_031912, SESE_033196, SESE_034129, SESE_036172, SESE_036378, SESE_036389, SESE_040522, SESE_040877, SESE_040956, SESE_041391, SESE_042077, SESE_042150, SESE_042640, SESE_043780, SESE_044147, SESE_044612, SESE_045328, SESE_045353, SESE_045883, SESE_046018, SESE_046095, SESE_046545, SESE_046959, SESE_047100, SESE_047246, SESE_048215, SESE_048640, SESE_049791, SESE_049953, SESE_0503…
OG0000003	GGJG01004344.1.p1, GGJG01004691.1.p1, GGJG01009669.1.p1, GGJG01010930.1.p1, GGJG01013500.1.p1, GGJG01016574.1.p1, GGJG01018989.1.p1, GGJG01019677.1.p1, GGJG01019678.1.p1, GGJG01020775.1.p1, GGJG01021106.1.p1, GGJG01021898.1.p1, GGJG01024492.1.p1, GGJG01025177.1.p1, GGJG01026101.1.p1, GGJG01026145.1.p1, GGJG01029193.1.p1, GGJG01030577.1.p1, GGJG01030825.1.p1, GGJG01031137.1.p1, GGJG01032344.1.p1, …	evm_27.model.AmTr_v1.0_scaffold00005.122 pacid=31575998 transcript=evm_27.model.AmTr_v1.0_scaffold00005.122 locus=evm_27.TU.AmTr_v1.0_scaffold00005.122 ID=evm_27.model.AmTr_v1.0_scaffold00005.122.v1.0 annot-version=v1.0, evm_27.model.AmTr_v1.0_scaffold00009.235 pacid=31568868 transcript=evm_27.model.AmTr_v1.0_scaffold00009.235 locus=evm_27.TU.AmTr_v1.0_scaffold00009.235 ID=evm_27.model.AmTr_v1.0_…	GBYR01019961.1.p1, GBYR01035581.1.p1, GBYR01038672.1.p1, GBYR01054597.1.p1, GGBW01023235.1.p1, GGBW01030594.1.p1, GGBW01038377.1.p1, GGBW01047432.1.p1, GGBW01051142.1.p1, GHLL01014103.1.p1, GHLL01203669.1.p1, GHLL01226392.1.p1, GHLL01251181.1.p1, GHLL01270117.1.p1, Gb_09285, Gb_12854, Gb_12859, Gb_15875, Gb_18200, Gb_24029, Gb_24897, Gb_33911	TnS000153841t02, TnS001003629t04, TnS001003629t05, TnS013846132t01		GCHX01054096.1.p1, GCHX01253002.1.p1, GCHX01346960.1.p1, GCHX01348173.1.p1, GCHX01352596.1.p1, GCHX01449114.1.p1, GCHX01452462.1.p1, GCHX01454472.1.p1, GCZO01000817.1.p1, GCZO01003693.1.p1, GCZO01009165.1.p1, GCZO01009811.1.p1, GCZO01209653.1.p1, gb|GFBZ01003254.1|.p1, gb|GFBZ01005212.1|.p1, gb|GFBZ01007047.1|.p1, gb|GFBZ01007293.1|.p1, gb|GFBZ01008106.1|.p1, gb|GFBZ01008355.1|.p1, gb|GFBZ0100964…	GGJJ01004091.1.p1, GGJJ01006445.1.p1, GGJJ01006523.1.p1, GGJJ01012312.1.p1, GGJJ01013771.1.p1, GGJJ01013772.1.p1, GGJJ01014321.1.p1, GGJJ01016917.1.p1, GGJJ01021172.1.p1, GGJJ01022690.1.p1, GGJJ01023928.1.p1, GGJJ01024226.1.p1, GGJJ01024301.1.p1, GGJJ01024439.1.p1, GGJJ01024456.1.p1, GGJJ01024534.1.p1, GGJJ01025008.1.p1, GGJJ01025496.1.p1, GGJJ01025537.1.p1, GGJJ01025654.1.p1, GGJJ01026008.1.p1, …	GDQR01000581.1.p1, GDQR01002681.1.p1, GDQR01003905.1.p1, GDQR01004177.1.p1, GDQR01004612.1.p1, GDQR01007169.1.p1, GDQR01009807.1.p1, GDQR01010006.1.p1, GDQR01011063.1.p1, GDQR01011756.1.p1, GDQR01012863.1.p1, GDQR01018616.1.p1, GDQR01021070.1.p1, GDQR01021902.1.p1, GDQR01023235.1.p1, GFLL01025380.1.p1, GFLL01028194.1.p1, GFLL01038760.1.p1, GFLL01040258.1.p1, GFLL01043956.1.p1, GFLL01050974.1.p1, …	GGJH01000905.1.p1, GGJH01001204.1.p1, GGJH01001206.1.p1, GGJH01001254.1.p1, GGJH01001927.1.p1, GGJH01002581.1.p1, GGJH01003059.1.p1, GGJH01004694.1.p1, GGJH01009579.1.p1, GGJH01010558.1.p1, GGJH01014389.1.p1, GGJH01014818.1.p1, GGJH01015172.1.p1, GGJH01018158.1.p1, GGJH01020208.1.p1, GGJH01022521.1.p1, GGJH01024072.1.p1, GGJH01024604.1.p1, GGJH01026298.1.p1, GGJH01026369.1.p1, GGJH01027724.1.p1, …	HAMI01000438.1.p1, HAMI01000532.1.p1, HAMI01000626.1.p1, HAMI01001878.1.p1, HAMI01001924.1.p1, HAMI01002949.1.p1, HAMI01004652.1.p1, HAMI01008751.1.p1, HAMI01008815.1.p1, HAMI01010399.1.p1, HAMI01011791.1.p1, HAMI01012230.1.p1, HAMI01015563.1.p1, HAMI01017466.1.p1, HAMI01018734.1.p1, HAMI01019579.1.p1, HAMI01020259.1.p1, HAMI01020587.1.p1, HAMI01020614.1.p1, HAMI01022158.1.p1, HAMI01029513.1.p1, …	GBLJ01000931.1.p1, GBLJ01001625.1.p1, GBLJ01002148.1.p1, GBLJ01002534.1.p1, GBLJ01002862.1.p1, GBLJ01008951.1.p1, GBLJ01009096.1.p1, GBLJ01011253.1.p1, GBLJ01011562.1.p1, GBLJ01013460.1.p1, GBLJ01015332.1.p1, GBLJ01015333.1.p1, GBLJ01015532.1.p1, GBLJ01019109.1.p1, GBLJ01019670.1.p1, GBLJ01019829.1.p1, GBLJ01020086.1.p1, GBLJ01024266.1.p1, GBLJ01025507.1.p1, GBLJ01031191.1.p1, GBLJ01035296.1.p1, …	PILA_00659, PILA_02153, PILA_02155, PILA_02216, PILA_02312, PILA_02314, PILA_02761, PILA_03703, PILA_06675, PILA_06715, PILA_07138, PILA_07307, PILA_07601, PILA_07699, PILA_08565, PILA_09000, PILA_09594, PILA_09598, PILA_10467, PILA_10825, PILA_10863, PILA_11226, PILA_12159, PILA_12449, PILA_15253, PILA_15350, PILA_16218, PILA_16348, PILA_16444, PILA_16550, PILA_19441, PILA_19474, PILA_20813, PIL…	GAQR01002713.1.p2, GAQR01004114.1.p1, GAQR01005735.1.p2, GAQR01006601.1.p1, GAQR01006769.1.p2, GAQR01012881.1.p1, GAQR01013119.1.p1, GAQR01024686.1.p1, GAQR01025087.1.p1, GAQR01025088.1.p1, GAQR01027226.1.p1, GAQR01030260.1.p1, GAQR01037264.1.p1, GAQR01039455.1.p1, GAQR01041610.1.p1, GAQR01042274.1.p1, GAQR01042974.1.p1, GAQR01043476.1.p1, GAQR01044724.1.p1, GAQR01048465.1.p1, GAQR01048519.1.p1, …	GBQX01017846.1.p1, GBQX01018999.1.p1, GBQX01022547.1.p1, GBQX01025522.1.p1, GBQX01026951.1.p1, GBQX01027279.1.p1, GBQX01031741.1.p1, GBQX01032135.1.p1, GBQX01035120.1.p1, GBQX01035923.1.p1, GBQX01038724.1.p1, GBQX01041954.1.p1, GBQX01048484.1.p1, GBQX01049198.1.p1, GBQX01052637.1.p1, GBQX01053344.1.p1, GDQD01008915.1.p1	GECO01000900.1.p1, GECO01001204.1.p1, GECO01004381.1.p1, GECO01005118.1.p1, GECO01005489.1.p2, GECO01005715.1.p1, GECO01005749.1.p1, GECO01009971.1.p1, GECO01010254.1.p1, GECO01010509.1.p1, GECO01010670.1.p1, GECO01010811.1.p1, GECO01011025.1.p1, GECO01011128.1.p1, GECO01011129.1.p1, GECO01011201.1.p1, GECO01011207.1.p1, GECO01011212.1.p1, GECO01013265.1.p1, GECO01013735.1.p1, GECO01015129.1.p1, …	GGJK01000853.1.p1, GGJK01001769.1.p1, GGJK01001770.1.p1, GGJK01005227.1.p1, GGJK01009460.1.p1, GGJK01012835.1.p1, GGJK01013196.1.p1, GGJK01015133.1.p1, GGJK01017523.1.p1, GGJK01017988.1.p1, GGJK01018255.1.p1, GGJK01020786.1.p1, GGJK01021093.1.p1, GGJK01021891.1.p1, GGJK01022210.1.p1, GGJK01022763.1.p1, GGJK01023208.1.p1, GGJK01024365.1.p1, GGJK01024380.1.p1, GGJK01024986.1.p1, GGJK01025448.1.p1, …	1A_I11_NT_comp50679_c1_seq11_1 type=cds; aalen=887_82%_complete; clen=3214; strand=-; offs=2936-273; evgclass=main_okay_match_1A_I11_NT_comp50679_c1_seq7_pct_99_100;, 1A_I11_VO_L_1_T_156925_226447_1 C_0.000_Length_3053 type=cds; aalen=967_95%_complete; clen=3053; strand=-; offs=3002-99; evgclass=main_okay_match_1A_I9_VO_L_1003_T_8_29 C_0.073_Length_2845_pct_99_100;, 1A_I11_VO_L_1_T_215402_226447_…	GFZL01000508.1.p1, GFZL01008902.1.p1, GFZL01008906.1.p1, GFZL01009780.1.p1, GFZL01011648.1.p1, GFZL01012947.1.p1, GFZL01013041.1.p1, GFZL01013070.1.p1, GFZL01013472.1.p1, GFZL01014462.1.p1, GFZL01014788.1.p1, GFZL01014802.1.p1, GFZL01015731.1.p1, GFZL01016500.1.p1, GFZL01016761.1.p1, GFZL01019053.1.p1, GFZL01019841.1.p1, GFZL01019898.1.p1, GFZL01019955.1.p1, GFZL01019974.1.p1, GFZL01020057.1.p1, …	GAZW02007350.1.p1, GAZW02010226.1.p1, GAZW02011227.1.p1, GAZW02015013.1.p1, GAZW02015014.1.p1, GAZW02020049.1.p1, GAZW02026763.1.p1, GAZW02031249.1.p1, GAZW02031852.1.p1, GAZW02034168.1.p1, GAZW02034170.1.p1, GAZW02036880.1.p1, GAZW02039928.1.p1, GAZW02039929.1.p1, GAZW02041456.1.p1, GAZW02053784.1.p1, GAZW02056192.1.p1, GAZW02065475.1.p1, GAZW02065485.1.p1, GAZW02071051.1.p1, GAZW02072000.1.p1, …		SEGI_21117, SEGI_32536	SESE_030415, SESE_056573, SESE_069062, SESE_097219, SESE_106969, SESE_125422, SESE_130987, SESE_142356, SESE_147422, SESE_148378
OG0000004	GGJG01001507.1.p1, GGJG01001965.1.p1, GGJG01002971.1.p1, GGJG01008386.1.p1, GGJG01010586.1.p1, GGJG01010785.1.p1, GGJG01011756.1.p1, GGJG01011757.1.p1, GGJG01011764.1.p1, GGJG01013253.1.p1, GGJG01014184.1.p1, GGJG01014499.1.p1, GGJG01015807.1.p1, GGJG01024013.1.p1, GGJG01024676.1.p1, GGJG01025856.1.p1, GGJG01026357.1.p1, GGJG01027744.1.p1, GGJG01029336.1.p1, GGJG01035160.1.p1, GGJG01037714.1.p1, …	evm_27.model.AmTr_v1.0_scaffold00002.146 pacid=31562591 transcript=evm_27.model.AmTr_v1.0_scaffold00002.146 locus=evm_27.TU.AmTr_v1.0_scaffold00002.146 ID=evm_27.model.AmTr_v1.0_scaffold00002.146.v1.0 annot-version=v1.0, evm_27.model.AmTr_v1.0_scaffold00003.311 pacid=31565622 transcript=evm_27.model.AmTr_v1.0_scaffold00003.311 locus=evm_27.TU.AmTr_v1.0_scaffold00003.311 ID=evm_27.model.AmTr_v1.0_…	GBYR01037415.1.p1, GBYR01037416.1.p1, GBYR01037419.1.p1, GBYR01038353.1.p1, GBYR01038792.1.p2, GBYR01038793.1.p3, GHLL01167559.1.p1, GHLL01167560.1.p1, GHLL01169135.1.p1, GHLL01242079.1.p1, GHLL01249444.1.p1, GHLL01249445.1.p1, GHLL01279645.1.p1, GHLL01279648.1.p1, Gb_05028, Gb_06745, Gb_08043, Gb_08211, Gb_09324, Gb_10043, Gb_11596, Gb_11598, Gb_11599, Gb_13692, Gb_13699, Gb_13998, Gb_15782, Gb_…	TnS000082483t16, TnS000166195t02, TnS000411173t01, TnS000462577t01, TnS000465271t01, TnS000607417t02, TnS000632099t02, TnS000649429t01, TnS000669167t01, TnS000676219t02, TnS000726519t01, TnS000733617t01, TnS000817421t02, TnS000819645t02, TnS000849805t01, TnS000849805t02, TnS000865713t01, TnS000886571t02, TnS000886571t04, TnS000961721t06, TnS000979429t02, TnS000989535t01, TnS001034735t01	Megl_c12679_g1_i1.p1, Megl_c12679_g1_i3.p2, Megl_c13228_g1_i1.p1, Megl_c16722_g1_i3.p1, Megl_c21994_g2_i1.p1, Megl_c23251_g1_i1.p1, Megl_c23251_g2_i1.p1, Megl_c25526_g2_i3.p1, Megl_c26200_g1_i2.p1, Megl_c26284_g1_i3.p1	GCHX01349522.1.p1, GCZO01001612.1.p1, GCZO01206059.1.p1, GCZO01302033.1.p1, GCZO01305909.1.p1, GQ027124_B02.2, GQ03211_H02.3, GQ03419_N24.1, GQ03804_I10.1, PG01r131103s167906278--76980-85786, PG01r131103s168081439--18360-29345--pseudo--s3, PG01r131103s168224721--56790-65258--pseudo--s5--fs, PG01r131103s168406731--101549-96865, PG01r131103s168522534--27303-14556--pseudo--s9--fs, PG01r131103s168536…	GGJJ01004932.1.p1, GGJJ01005010.1.p1, GGJJ01006949.1.p1, GGJJ01007760.1.p1, GGJJ01008547.1.p1, GGJJ01010959.1.p1, GGJJ01011997.1.p1, GGJJ01012002.1.p1, GGJJ01013521.1.p1, GGJJ01014254.1.p1, GGJJ01014464.1.p1, GGJJ01014787.1.p1, GGJJ01016113.1.p1, GGJJ01021938.1.p1, GGJJ01023753.1.p1, GGJJ01025249.1.p1, GGJJ01025430.1.p1, GGJJ01030950.1.p1, GGJJ01033020.1.p1, GGJJ01033050.1.p1, GGJJ01042502.1.p1, …	GDQR01000691.1.p1, GDQR01001797.1.p1, GDQR01002607.1.p1, GDQR01004748.1.p1, GDQR01006249.1.p1, GDQR01013305.1.p1, GFLL01045144.1.p1, GFLL01054629.1.p1, GFLL01061784.1.p1, GFLL01061787.1.p1, GFLL01061790.1.p1, GFLL01064274.1.p1, GFLL01082589.1.p1, GFLL01085684.1.p1, GFLL01095243.1.p1, GFLL01102927.1.p1, GFLL01102935.1.p1, GFLL01109041.1.p2, GFLL01109042.1.p1, GFLL01109043.1.p1, GFLL01109045.1.p1, …	GGJH01001154.1.p1, GGJH01002296.1.p1, GGJH01003907.1.p1, GGJH01004818.1.p1, GGJH01006353.1.p1, GGJH01010006.1.p1, GGJH01017824.1.p1, GGJH01021599.1.p1, GGJH01022156.1.p1, GGJH01022459.1.p1, GGJH01023312.1.p1, GGJH01023825.1.p1, GGJH01024265.1.p1, GGJH01025249.1.p1, GGJH01026769.1.p1, GGJH01027613.1.p1, GGJH01028053.1.p1, GGJH01028829.1.p1, GGJH01030353.1.p1, GGJH01031021.1.p1, GGJH01031597.1.p1, …	HAMI01000109.1.p2, HAMI01001689.1.p1, HAMI01002060.1.p1, HAMI01002175.1.p1, HAMI01002467.1.p1, HAMI01003337.1.p1, HAMI01003374.1.p1, HAMI01003755.1.p1, HAMI01004592.1.p1, HAMI01005241.1.p1, HAMI01006569.1.p1, HAMI01010709.1.p1, HAMI01011562.1.p1, HAMI01013054.1.p1, HAMI01014766.1.p1, HAMI01017453.1.p1, HAMI01019203.1.p1, HAMI01023093.1.p1, HAMI01029383.1.p1, HAMI01030071.1.p1, HAMI01032289.1.p1, …	GBLJ01018987.1.p1, GBLJ01022820.1.p1, GBLJ01026241.1.p1, gb|GESU01012026.1|.p1, gb|GESU01014472.1|.p1, gb|GESU01022863.1|.p1, gb|GESU01042625.1|.p2	PILA_00641, PILA_01036, PILA_01165, PILA_01666, PILA_02517, PILA_03024, PILA_04281, PILA_05022, PILA_05315, PILA_05707, PILA_05851, PILA_08692, PILA_08693, PILA_09301, PILA_09303, PILA_11591, PILA_12369, PILA_12453, PILA_14118, PILA_15284, PILA_15522, PILA_16146, PILA_16378, PILA_17089, PILA_17470, PILA_17707, PILA_18087, PILA_18297, PILA_18298, PILA_18465, PILA_19631, PILA_19633, PILA_20188, PIL…	GAQR01012048.1.p1, GAQR01012049.1.p1, GAQR01013022.1.p1, GAQR01020162.1.p1, GAQR01025697.1.p1, GAQR01026695.1.p1, GAQR01026696.1.p1, GAQR01026699.1.p1, GAQR01026924.1.p1, GAQR01038030.1.p1, GAQR01038042.1.p1, GAQR01053288.1.p1, GFHB01007703.1.p1, GFHB01032659.1.p1, GFHB01069282.1.p1, GFHB01086820.1.p1, GFHB01110400.1.p1, GFHB01124411.1.p1, GFHB01181872.1.p1	GBQX01017079.1.p1, GBQX01029786.1.p1, GBQX01030678.1.p1, GBQX01034226.1.p1, GBQX01040577.1.p1, GBQX01043403.1.p1, GBQX01046430.1.p1, GBQX01047450.1.p1, GBQX01050102.1.p1, GDQD01000225.1.p1, GDQD01000232.1.p1, GDQD01000799.1.p1, GDQD01001538.1.p1, GDQD01002747.1.p1, GDQD01004078.1.p1, GDQD01006582.1.p1, GDQD01006815.1.p1	GECO01004602.1.p1, GECO01009286.1.p1, GECO01009289.1.p1, GECO01016826.1.p1, GECO01017350.1.p1, GECO01021046.1.p1, GECO01021088.1.p1, GECO01021978.1.p1, GECO01031569.1.p1, GECO01034041.1.p1, GECO01035626.1.p1, GECO01037395.1.p1, GECO01038033.1.p1, GECO01038131.1.p1, GECO01038993.1.p1, GECO01039272.1.p1, GECO01040600.1.p1, GECO01040613.1.p1, GECO01040655.1.p1, GECO01043247.1.p1, GECO01043511.1.p1, …	GGJK01001858.1.p1, GGJK01005726.1.p1, GGJK01007785.1.p1, GGJK01008989.1.p1, GGJK01017924.1.p1, GGJK01020032.1.p1, GGJK01020412.1.p1, GGJK01020499.1.p2, GGJK01020727.1.p1, GGJK01023271.1.p1, GGJK01023382.1.p1, GGJK01024772.1.p1, GGJK01025016.1.p1, GGJK01025543.1.p1, GGJK01025574.1.p1, GGJK01025700.1.p1, GGJK01026249.1.p1, GGJK01028588.1.p1, GGJK01029485.1.p1, GGJK01030476.1.p1, GGJK01030715.1.p1, …	1A_I11_VO_L_1230_T_11_17_1 C_0.367_Length_1825 type=cds; aalen=487_80%_complete; clen=1825; strand=+; offs=191-1654; evgclass=main_okay_match_1A_I11_VO_L_1230_T_5_17 C_0.367_Length_1699_pct_99_98;, 1A_I11_VO_L_1_T_45988_226447_1 C_0.000_Length_2173 type=cds; aalen=629_86%_complete; clen=2173; strand=+; offs=103-1992; evgclass=main_okay_match_1A_I11_NT_comp46990_c0_seq2_pct_99_97;, 1A_I3_VO_L_1_T_…	GFZL01002702.1.p1, GFZL01003719.1.p1, GFZL01003977.1.p1, GFZL01005080.1.p1, GFZL01007760.1.p1, GFZL01013947.1.p1, GFZL01014085.1.p1, GFZL01016197.1.p1, GFZL01020570.1.p1, GFZL01021291.1.p1, GFZL01021610.1.p1, GFZL01022258.1.p1, GFZL01022735.1.p1, GFZL01022903.1.p1, GFZL01022904.1.p1, GFZL01023074.1.p1, GFZL01023422.1.p1, GFZL01023554.1.p1, GFZL01023671.1.p1, GFZL01023971.1.p1, GFZL01026275.1.p1, …	GAZW02050374.1.p1, GAZW02071778.1.p1, GAZW02071780.1.p1, GAZW02074359.1.p1, GAZW02074362.1.p1, GAZW02082823.1.p1, GAZW02085119.1.p1, GFFY01003795.1.p1, GFFY01007054.1.p1, GFFY01008837.1.p1, GFFY01012054.1.p1, GFFY01012737.1.p1, GFFY01013141.1.p1, GFFY01015149.1.p1, GFFY01017963.1.p1, GFFY01019819.1.p1, GFFY01023233.1.p1, GFFY01026852.1.p1, GFFY01027026.1.p1, GFFY01041280.1.p1, GFFY01044930.1.p1, …	Thoc_c15310_g1_i1.p1, Thoc_c21469_g1_i1.p1, Thoc_c21469_g1_i2.p1, Thoc_c21612_g1_i1.p1, Thoc_c25445_g1_i2.p1, Thoc_c25445_g1_i2.p2, Thoc_c27159_g1_i2.p1, Thoc_c27159_g2_i1.p1, Thoc_c28977_g1_i2.p1, Thoc_c28977_g1_i2.p2, Thoc_c28977_g1_i3.p2, Thoc_c8277_g1_i1.p1	SEGI_00585, SEGI_01334, SEGI_01341, SEGI_01357, SEGI_02980, SEGI_03225, SEGI_03312, SEGI_03851, SEGI_04104, SEGI_04276, SEGI_04618, SEGI_05293, SEGI_05588, SEGI_05927, SEGI_06964, SEGI_08633, SEGI_08790, SEGI_10298, SEGI_10985, SEGI_11483, SEGI_11561, SEGI_13577, SEGI_14593, SEGI_15282, SEGI_15637, SEGI_16429, SEGI_16461, SEGI_17077, SEGI_18609, SEGI_18699, SEGI_19974, SEGI_21481, SEGI_21763, SEG…	SESE_001153, SESE_003649, SESE_006900, SESE_008106, SESE_015591, SESE_020182, SESE_020392, SESE_021673, SESE_021977, SESE_024358, SESE_024433, SESE_028524, SESE_028715, SESE_028933, SESE_030091, SESE_031836, SESE_031996, SESE_032494, SESE_032505, SESE_032906, SESE_034450, SESE_035278, SESE_035566, SESE_038309, SESE_038684, SESE_040072, SESE_040152, SESE_040927, SESE_041578, SESE_042219, SESE_0425…
OG0000005	GGJG01026034.1.p2, GGJG01027259.1.p1, GGJG01031004.1.p1, GGJG01031385.1.p1, GGJG01032309.1.p1, GGJG01032676.1.p1, GGJG01041262.1.p1, GGJG01041885.1.p1, GGJG01043621.1.p1		GBYR01007618.1.p1, GBYR01012399.1.p1, GBYR01059136.1.p1, GGBW01006521.1.p1, GGBW01006526.1.p1, GGBW01012013.1.p2, GGBW01013405.1.p1, GGBW01017799.1.p1, GGBW01018544.1.p1, GGBW01021552.1.p1, GGBW01025109.1.p1, GGBW01037577.1.p1, GGBW01037608.1.p2, GGBW01042093.1.p1, GGBW01043006.1.p2, GGBW01048788.1.p1, GGBW01052167.1.p1, GHLL01006583.1.p1, GHLL01021819.1.p1, GHLL01022241.1.p1, GHLL01036233.1.p3, …		Megl_c17608_g3_i1.p1, Megl_c18439_g2_i1.p1	GCHX01047079.1.p1, GCHX01050988.1.p1, GCHX01051644.1.p1, GCHX01052292.1.p1, GCHX01053565.1.p1, GCHX01055023.1.p1, GCHX01147011.1.p1, GCHX01147313.1.p1, GCHX01149290.1.p1, GCHX01152461.1.p1, GCHX01247335.1.p1, GCHX01247483.1.p1, GCHX01248786.1.p1, GCHX01253297.1.p1, GCHX01347854.1.p1, GCHX01350085.1.p1, GCHX01351293.1.p1, GCHX01354236.1.p1, GCHX01445708.1.p1, GCHX01448975.1.p1, GCHX01449286.1.p1, …	GGJJ01017548.1.p2, GGJJ01019009.1.p1, GGJJ01024297.1.p1, GGJJ01027930.1.p1, GGJJ01028923.1.p1, GGJJ01031851.1.p1, GGJJ01032095.1.p1, GGJJ01035891.1.p1, GGJJ01037912.1.p1, GGJJ01039333.1.p1, GGJJ01039393.1.p1, GGJJ01039706.1.p1, GGJJ01043992.1.p1, GGJJ01046851.1.p1, GGJJ01046877.1.p1, GGJJ01053596.1.p1	GDQR01001221.1.p1, GDQR01001914.1.p1, GDQR01002696.1.p1, GFLL01005253.1.p1, GFLL01007182.1.p1, GFLL01007561.1.p1, GFLL01007568.1.p1, GFLL01008476.1.p1, GFLL01034358.1.p1, GFLL01036662.1.p2, GFLL01036663.1.p1, GFLL01038227.1.p1, GFLL01038600.1.p1, GFLL01042001.1.p2, GFLL01056219.1.p1, GFLL01056932.1.p1, GFLL01066196.1.p1, GFLL01067522.1.p1, GFLL01069019.1.p1, GFLL01086237.1.p1, GFLL01086976.1.p1, …	GGJH01017707.1.p1, GGJH01019551.1.p1, GGJH01019647.1.p1, GGJH01019684.1.p1, GGJH01025838.1.p2, GGJH01026805.1.p2, GGJH01030212.1.p1, GGJH01030348.1.p1, GGJH01030815.1.p2, GGJH01035385.1.p1, GGJH01041596.1.p1, GGJH01041737.1.p2	HAMI01002623.1.p1, HAMI01006506.1.p1, HAMI01006813.1.p1, HAMI01007334.1.p1, HAMI01008274.1.p1, HAMI01008300.1.p2, HAMI01008517.1.p1, HAMI01009092.1.p1, HAMI01010862.1.p1, HAMI01024534.1.p1, HAMI01024989.1.p1, HAMI01027832.1.p1, HAMI01030410.1.p1, HAMI01031562.1.p1, HAMI01033040.1.p1, HAMI01035844.1.p3	GBLJ01002633.1.p1, GBLJ01005809.1.p1, GBLJ01006162.1.p1, GBLJ01009776.1.p1, GBLJ01013473.1.p1, GBLJ01015044.1.p1, GBLJ01017172.1.p1, GBLJ01020414.1.p1, GBLJ01021603.1.p1, GBLJ01022116.1.p1, GBLJ01022382.1.p1, GBLJ01022544.1.p1, GBLJ01025921.1.p1, GBLJ01029722.1.p1, GBLJ01030011.1.p1, GBLJ01032325.1.p1, GBLJ01032447.1.p1, GBLJ01032569.1.p1, GBLJ01036846.1.p1, GBLJ01038836.1.p1, GBLJ01039510.1.p1, …	PILA_00915, PILA_01514, PILA_04186, PILA_04567, PILA_05809, PILA_07431, PILA_07748, PILA_08468, PILA_14246, PILA_14415, PILA_15493, PILA_15530, PILA_15591, PILA_18082, PILA_20366, PILA_21410, PILA_24891, PILA_28828, PILA_28992, PILA_30593, PILA_30798, PILA_32489, PILA_33176, PILA_34384, PILA_38497, gb|GEUZ01002510.1|.p1, gb|GEUZ01005928.1|.p1, gb|GEUZ01007957.1|.p1, gb|GEUZ01008368.1|.p1, gb|GEUZ…	GFHB01020597.1.p1, GFHB01033217.1.p1, GFHB01051803.1.p1, GFHB01072860.1.p2, GFHB01079293.1.p1, GFHB01101424.1.p1, GFHB01120336.1.p1, GFHB01126797.1.p1, GFHB01130293.1.p1, GFHB01143423.1.p2, GFHB01147628.1.p1, GFHB01164216.1.p1, GFHB01164626.1.p1, GFHB01172914.1.p1, GFHB01175942.1.p1	GBQX01024489.1.p1, GBQX01032958.1.p1, GBQX01034813.1.p1, GBQX01035554.1.p1, GBQX01037507.1.p2, GBQX01039427.1.p1, GBQX01039581.1.p1, GBQX01039607.1.p1, GBQX01039868.1.p2, GBQX01041003.1.p1, GBQX01041081.1.p1, GBQX01042808.1.p1, GBQX01045871.1.p2, GBQX01046807.1.p1, GBQX01048105.1.p1, GBQX01048380.1.p1, GBQX01049560.1.p1, GBQX01050121.1.p2, GBQX01053048.1.p3, GBQX01053929.1.p1, GBQX01053972.1.p1, …	GECO01000946.1.p1, GECO01001211.1.p1, GECO01002669.1.p1, GECO01006120.1.p1, GECO01006206.1.p1, GECO01006249.1.p1, GECO01007665.1.p1, GECO01011717.1.p1, GECO01011765.1.p1, GECO01013526.1.p1, GECO01019808.1.p1, GECO01019833.1.p1, GECO01023455.1.p1, GECO01029947.1.p1, GECO01030587.1.p1, GECO01031416.1.p1, GECO01034304.1.p1, GECO01035322.1.p1, GECO01051925.1.p1, GGAU01004192.1.p2, GGAU01015731.1.p1, …	GGJK01025835.1.p1, GGJK01030331.1.p1, GGJK01030853.1.p1, GGJK01032663.1.p1, GGJK01036355.1.p1, GGJK01043106.1.p1	1A_I11_VO_L_4467_T_15_23_1 C_0.357_Length_1341 type=cds; aalen=335_75%_complete; clen=1341; strand=+; offs=63-1070; evgclass=main_okay_match_1A_I11_VO_L_4467_T_11_23 C_0.393_Length_932_pct_98_100;, 1A_I3_VO_L_33034_T_6_15_1 C_0.043_Length_1416 type=cds; aalen=258_54%_complete-utrpoor; clen=1416; strand=-; offs=1402-626; evgclass=main_okay_match_2A_I4_VO_L_1495_T_2_3 C_0.333_Length_1080_pct_99_100…	GFZL01003290.1.p1, GFZL01010339.1.p1, GFZL01010489.1.p1, GFZL01011421.1.p1, GFZL01011473.1.p1, GFZL01012609.1.p1, GFZL01014371.1.p1, GFZL01014438.1.p1, GFZL01014903.1.p1, GFZL01015257.1.p1, GFZL01015426.1.p1, GFZL01017703.1.p1, GFZL01018164.1.p1, GFZL01018720.1.p1, GFZL01018954.1.p1, GFZL01018956.1.p1, GFZL01018979.1.p1, GFZL01019134.1.p2, GFZL01019215.1.p1, GFZL01019222.1.p1, GFZL01019371.1.p2, …	GAZW02000442.1.p2, GAZW02000798.1.p1, GAZW02002119.1.p1, GAZW02002122.1.p1, GAZW02002798.1.p1, GAZW02003775.1.p1, GAZW02004108.1.p1, GAZW02004577.1.p1, GAZW02004626.1.p1, GAZW02004908.1.p1, GAZW02004951.1.p1, GAZW02005025.1.p1, GAZW02005371.1.p1, GAZW02005422.1.p1, GAZW02005906.1.p1, GAZW02007694.1.p1, GAZW02007806.1.p1, GAZW02008072.1.p1, GAZW02008296.1.p1, GAZW02008347.1.p1, GAZW02008504.1.p1, …	Thoc_c14117_g1_i1.p1, Thoc_c19165_g2_i1.p1, Thoc_c20458_g2_i1.p1, Thoc_c22749_g1_i1.p1, Thoc_c24360_g2_i1.p1, Thoc_c35558_g1_i1.p1, Thoc_c49376_g1_i1.p2, Thoc_c59775_g1_i1.p1	SEGI_02004, SEGI_08092, SEGI_08783, SEGI_09277, SEGI_09638, SEGI_09792, SEGI_11255, SEGI_15933, SEGI_16276, SEGI_16645, SEGI_17658, SEGI_22102, SEGI_22373, SEGI_23701, SEGI_24600, SEGI_25609, SEGI_28066, SEGI_28184, SEGI_28571, SEGI_28891, SEGI_29606, SEGI_29923, SEGI_33657, SEGI_39706	SESE_013132, SESE_032683, SESE_047318, SESE_048627, SESE_051254, SESE_051291, SESE_051756, SESE_051871, SESE_052249, SESE_054175, SESE_054190, SESE_056237, SESE_056550, SESE_057921, SESE_058302, SESE_059110, SESE_059406, SESE_060283, SESE_060844, SESE_064563, SESE_065870, SESE_066812, SESE_067454, SESE_068105, SESE_068446, SESE_070429, SESE_070593, SESE_070859, SESE_071471, SESE_073029, SESE_0732…
OG0000006	GGJG01000114.1.p1, GGJG01000270.1.p1, GGJG01000398.1.p1, GGJG01000886.1.p1, GGJG01001157.1.p1, GGJG01001752.1.p1, GGJG01002506.1.p1, GGJG01005073.1.p1, GGJG01006982.1.p1, GGJG01007255.1.p1, GGJG01008667.1.p1, GGJG01008772.1.p1, GGJG01009074.1.p1, GGJG01014213.1.p1, GGJG01014697.1.p1, GGJG01018861.1.p1, GGJG01021448.1.p1, GGJG01040053.1.p1, GGJG01040602.1.p1	evm_27.model.AmTr_v1.0_scaffold00010.313 pacid=31572798 transcript=evm_27.model.AmTr_v1.0_scaffold00010.313 locus=evm_27.TU.AmTr_v1.0_scaffold00010.313 ID=evm_27.model.AmTr_v1.0_scaffold00010.313.v1.0 annot-version=v1.0, evm_27.model.AmTr_v1.0_scaffold00011.125 pacid=31560898 transcript=evm_27.model.AmTr_v1.0_scaffold00011.125 locus=evm_27.TU.AmTr_v1.0_scaffold00011.125 ID=evm_27.model.AmTr_v1.0_…	GBYR01006345.1.p1, GBYR01019033.1.p1, GBYR01027349.1.p1, GBYR01027350.1.p1, GBYR01029317.1.p1, GBYR01034387.1.p1, GBYR01034493.1.p1, GBYR01034501.1.p1, GBYR01036108.1.p1, GBYR01036110.1.p1, GBYR01038402.1.p1, GBYR01047361.1.p1, GBYR01047557.1.p1, GBYR01049515.1.p1, GHLL01174067.1.p1, GHLL01501314.1.p1	TnS000036995t02, TnS000045715t02, TnS000079231t02, TnS000090925t01, TnS000091449t03, TnS000095137t04, TnS000136453t01, TnS000156315t06, TnS000156315t07, TnS000183345t02, TnS000184893t01, TnS000220955t07, TnS000253801t02, TnS000253801t03, TnS000262815t01, TnS000262815t03, TnS000343845t01, TnS000360557t01, TnS000360639t01, TnS000395707t01, TnS000395707t02, TnS000395707t04, TnS000434295t01, TnS00054…	Megl_c12770_g1_i2.p1, Megl_c214_g1_i1.p1, Megl_c21614_g1_i1.p1, Megl_c24199_g1_i1.p1, Megl_c24199_g2_i2.p1, Megl_c24757_g1_i3.p1, Megl_c27734_g2_i2.p1, Megl_c27734_g2_i3.p1, Megl_c27734_g2_i5.p1, Megl_c28624_g1_i3.p1, Megl_c28624_g1_i6.p1, Megl_c31523_g1_i1.p1	GCHX01154145.1.p1, GCZO01205774.1.p1, GCZO01300606.1.p1, gb|GFBZ01007492.1|.p1, gb|GFBZ01016030.1|.p1, gi|830824449|gb|GCZO01351687.1|.p1, gi|830829228|gb|GCZO01346910.1|.p1, gi|830829513|gb|GCZO01346625.1|.p1, gi|830847628|gb|GCZO01328513.1|.p1, gi|830852989|gb|GCZO01323154.1|.p1, gi|830934451|gb|GCZO01245723.1|.p1, gi|830938801|gb|GCZO01241373.1|.p1, gi|830946039|gb|GCZO01234136.1|.p1, gi|83098…	GGJJ01000230.1.p1, GGJJ01000263.1.p1, GGJJ01000412.1.p1, GGJJ01000940.1.p1, GGJJ01001780.1.p1, GGJJ01002833.1.p1, GGJJ01006313.1.p1, GGJJ01007132.1.p1, GGJJ01009240.1.p1, GGJJ01011664.1.p1, GGJJ01014526.1.p1, GGJJ01014527.1.p1, GGJJ01014977.1.p1, GGJJ01023469.1.p1, GGJJ01024793.1.p1, GGJJ01025859.1.p1, GGJJ01026009.1.p1, GGJJ01026759.1.p1, GGJJ01037213.1.p1, GGJJ01040861.1.p1	GDQR01003736.1.p1, GDQR01005132.1.p1, GDQR01005419.1.p1, GDQR01007813.1.p1, GDQR01010210.1.p1, GFLL01065306.1.p1, GFLL01132681.1.p1, GFLL01132687.1.p1, GFLL01132688.1.p1, gb|GFBO01080887.1|.p1	GGJH01002442.1.p1, GGJH01004038.1.p1, GGJH01004553.1.p1, GGJH01004554.1.p1, GGJH01005267.1.p1, GGJH01005931.1.p1, GGJH01007846.1.p1, GGJH01010460.1.p1, GGJH01016392.1.p1, GGJH01025146.1.p1, GGJH01026389.1.p1, GGJH01027270.1.p1, GGJH01029116.1.p1, GGJH01031870.1.p1, GGJH01032216.1.p1, GGJH01032673.1.p1, GGJH01034402.1.p2, GGJH01036111.1.p1, GGJH01038136.1.p1, GGJH01043890.1.p1, GGJH01044720.1.p1	HAMI01000342.1.p1, HAMI01000741.1.p1, HAMI01000941.1.p1, HAMI01003285.1.p1, HAMI01003461.1.p1, HAMI01004642.1.p1, HAMI01005496.1.p1, HAMI01005678.1.p1, HAMI01007166.1.p1, HAMI01010481.1.p1, HAMI01012323.1.p1, HAMI01015562.1.p1, HAMI01016144.1.p1, HAMI01016563.1.p1, HAMI01022545.1.p1, HAMI01024287.1.p1, HAMI01025020.1.p1, HAMI01026286.1.p1	GBLJ01008017.1.p1, GBLJ01009647.1.p1, GBLJ01013587.1.p1, GBLJ01021441.1.p1, GBLJ01023371.1.p1, GBLJ01031486.1.p1, gb|GESU01008600.1|.p1, gb|GESU01009676.1|.p1, gb|GESU01010219.1|.p1, gb|GESU01010220.1|.p1, gb|GESU01012978.1|.p1, gb|GESU01018437.1|.p1	PILA_00201, PILA_00742, PILA_02818, PILA_04064, PILA_04065, PILA_04832, PILA_04948, PILA_06230, PILA_08744, PILA_09078, PILA_09079, PILA_09354, PILA_09688, PILA_09689, PILA_09913, PILA_10376, PILA_10716, PILA_12035, PILA_12719, PILA_16668, PILA_16670, PILA_18710, PILA_18713, PILA_19366, PILA_19541, PILA_19544, PILA_19828, PILA_20043, PILA_20044, PILA_21106, PILA_21107, PILA_22271, PILA_23861, PIL…	GAQR01003448.1.p1, GAQR01007117.1.p1, GAQR01007729.1.p1, GAQR01008386.1.p4, GAQR01008848.1.p2, GAQR01009863.1.p3, GAQR01011263.1.p1, GAQR01014019.1.p1, GAQR01014913.1.p1, GAQR01027947.1.p1, GAQR01044472.1.p1, GAQR01045201.1.p1, GAQR01051709.1.p1, GAQR01051782.1.p1, GFHB01008581.1.p1, GFHB01023402.1.p1, GFHB01024297.1.p1, GFHB01105527.1.p1, GFHB01113661.1.p1, GFHB01143511.1.p1, GFHB01175639.1.p1, …	GBQX01025731.1.p2, GBQX01030167.1.p1, GBQX01031217.1.p1, GBQX01039119.1.p1, GBQX01043804.1.p1, GBQX01044952.1.p1, GBQX01045559.1.p1, GBQX01048622.1.p1, GBQX01049601.1.p1, GDQD01005316.1.p1, GDQD01006789.1.p1, GDQD01009085.1.p1, GDQD01009253.1.p1, GDQD01009598.1.p1	GECO01004473.1.p1, GECO01005467.1.p1, GECO01010399.1.p1, GECO01011908.1.p1, GECO01013602.1.p1, GECO01015698.1.p1, GECO01017182.1.p1, GECO01021787.1.p1, GECO01021788.1.p1, GECO01023031.1.p1, GECO01024881.1.p1, GECO01025187.1.p1, GECO01025189.1.p1, GECO01025318.1.p1, GECO01026014.1.p1, GECO01029832.1.p1, GECO01030250.1.p1, GECO01031441.1.p1, GECO01033594.1.p1, GECO01038916.1.p1, GECO01043365.1.p1, …	GGJK01000435.1.p1, GGJK01002228.1.p1, GGJK01003307.1.p1, GGJK01003653.1.p1, GGJK01004333.1.p1, GGJK01004458.1.p1, GGJK01004749.1.p1, GGJK01005354.1.p1, GGJK01005453.1.p1, GGJK01007032.1.p1, GGJK01008990.1.p1, GGJK01014512.1.p1, GGJK01015821.1.p1, GGJK01020034.1.p1, GGJK01022635.1.p1, GGJK01024345.1.p1, GGJK01026625.1.p1, GGJK01027134.1.p1, GGJK01028860.1.p1, GGJK01030266.1.p1, GGJK01032436.1.p1, …	1A_I11_VO_L_1_T_180196_226447_1 C_0.000_Length_2207 type=cds; aalen=587_79%_complete; clen=2207; strand=-; offs=1961-198; evgclass=main_okay_match_6A_I25_VO_L_1477_T_122_130 C_0.064_Length_2178_pct_98_88;, 1A_I11_VO_L_1_T_218864_226447_1 C_0.000_Length_2111 type=cds; aalen=557_79%_complete; clen=2111; strand=-; offs=2081-408; evgclass=main_okay_match_1A_I11_VO_L_1_T_218835_226447 C_0.000_Length_1…	GFZL01000301.1.p1, GFZL01000680.1.p1, GFZL01004001.1.p1, GFZL01004695.1.p1, GFZL01008091.1.p1, GFZL01014716.1.p1, GFZL01015520.1.p1, GFZL01016222.1.p1, GFZL01020855.1.p1, GFZL01020894.1.p1, GFZL01021089.1.p1, GFZL01021592.1.p1, GFZL01022346.1.p1, GFZL01023289.1.p1, GFZL01025490.1.p1, GFZL01025822.1.p1, GFZL01026284.1.p1, GFZL01026372.1.p1, GFZL01027514.1.p1	GAZW02013053.1.p1, GAZW02013983.1.p1, GAZW02014908.1.p1, GAZW02030779.1.p1, GAZW02030781.1.p1, GAZW02043902.1.p1, GAZW02046054.1.p1, GAZW02052195.1.p1, GAZW02052198.1.p1, GAZW02056390.1.p1, GAZW02056393.1.p1, GAZW02077809.1.p1, GAZW02077812.1.p1, GAZW02089925.1.p1, GAZW02089927.1.p1, GAZW02091306.1.p1, GAZW02091310.1.p1, GAZW02103882.1.p1, GFFY01013885.1.p1, GFFY01015570.1.p1, GFFY01015864.1.p1, …	Thoc_c17281_g1_i2.p1, Thoc_c24672_g2_i1.p1, Thoc_c25285_g1_i1.p1, Thoc_c28929_g1_i1.p1, Thoc_c28929_g1_i8.p2, Thoc_c41884_g1_i1.p1, Thoc_c48907_g1_i1.p1	SEGI_01052, SEGI_01350, SEGI_02414, SEGI_02824, SEGI_02940, SEGI_03049, SEGI_03572, SEGI_03747, SEGI_03859, SEGI_04470, SEGI_04585, SEGI_04589, SEGI_05228, SEGI_06272, SEGI_06611, SEGI_06779, SEGI_08084, SEGI_08235, SEGI_08271, SEGI_08837, SEGI_08998, SEGI_09122, SEGI_10711, SEGI_10879, SEGI_11979, SEGI_12315, SEGI_12558, SEGI_12595, SEGI_12636, SEGI_13059, SEGI_13122, SEGI_13960, SEGI_14520, SEG…	SESE_001145, SESE_004095, SESE_005569, SESE_011771, SESE_012853, SESE_013288, SESE_018332, SESE_023685, SESE_025852, SESE_027947, SESE_028803, SESE_029156, SESE_031504, SESE_032185, SESE_032796, SESE_033106, SESE_033151, SESE_033850, SESE_034038, SESE_034549, SESE_035020, SESE_036089, SESE_036445, SESE_037596, SESE_038913, SESE_038996, SESE_039928, SESE_041431, SESE_041506, SESE_041699, SESE_0423…
OG0000007	GGJG01000088.1.p1, GGJG01000089.1.p1, GGJG01000195.1.p1, GGJG01001492.1.p1, GGJG01002370.1.p1, GGJG01003925.1.p1, GGJG01004709.1.p1, GGJG01005313.1.p1, GGJG01007852.1.p1, GGJG01009096.1.p1, GGJG01011045.1.p1, GGJG01012172.1.p1, GGJG01013160.1.p1, GGJG01017481.1.p1, GGJG01020082.1.p1, GGJG01024336.1.p1, GGJG01024900.1.p1, GGJG01025073.1.p1, GGJG01030906.1.p1, GGJG01033210.1.p1, GGJG01033696.1.p1, …	evm_27.model.AmTr_v1.0_scaffold00033.264 pacid=31561693 transcript=evm_27.model.AmTr_v1.0_scaffold00033.264 locus=evm_27.TU.AmTr_v1.0_scaffold00033.264 ID=evm_27.model.AmTr_v1.0_scaffold00033.264.v1.0 annot-version=v1.0	GBYR01022890.1.p1, GBYR01033703.1.p1, GBYR01033704.1.p1, GBYR01034386.1.p1, GBYR01037177.1.p1, GBYR01037179.1.p1, GBYR01037181.1.p1, GGBW01008064.1.p1, GGBW01008069.1.p1, GGBW01009444.1.p1, GGBW01036691.1.p1, GHLL01100529.1.p1, GHLL01139417.1.p1, GHLL01152706.1.p1, GHLL01277519.1.p1, Gb_38649	TnS000181483t17, TnS000181483t18, TnS000236373t02, TnS000613069t07, TnS001029283t04, TnS001029283t05	Megl_c23128_g1_i1.p1, Megl_c23464_g1_i2.p1, Megl_c23822_g3_i1.p1, Megl_c24118_g2_i1.p1, Megl_c24288_g2_i1.p1, Megl_c26153_g1_i1.p1, Megl_c26854_g1_i3.p1, Megl_c27043_g1_i1.p1, Megl_c27043_g1_i2.p1, Megl_c27517_g1_i2.p1, Megl_c27517_g5_i1.p1, Megl_c27715_g11_i1.p1, Megl_c27715_g8_i1.p1, Megl_c27715_g8_i4.p1, Megl_c27715_g8_i6.p1, Megl_c29075_g1_i1.p1, Megl_c34965_g1_i1.p1, Megl_c662_g1_i1.p1, Megl…	GCHX01049551.1.p1, GCHX01146149.1.p1, GCHX01153463.1.p1, GCHX01248328.1.p1, GCHX01254216.1.p1, GCHX01352605.1.p1, GCHX01354023.1.p1, GCZO01202161.1.p1, GCZO01206466.1.p2, GCZO01208584.1.p3, GCZO01300194.1.p1, GCZO01302199.1.p1, GCZO01304386.1.p1, GCZO01308673.1.p1, gb|GFBZ01000094.1|.p1, gb|GFBZ01004637.1|.p1, gb|GFBZ01005200.1|.p2, gb|GFBZ01007633.1|.p1, gb|GFBZ01008842.1|.p1, gb|GFBZ01009764.1|…	GGJJ01000149.1.p1, GGJJ01000175.1.p1, GGJJ01000176.1.p1, GGJJ01004080.1.p1, GGJJ01005496.1.p1, GGJJ01005910.1.p1, GGJJ01008019.1.p1, GGJJ01011217.1.p1, GGJJ01017592.1.p1, GGJJ01018109.1.p1, GGJJ01018151.1.p1, GGJJ01019362.1.p1, GGJJ01021202.1.p1, GGJJ01021959.1.p1, GGJJ01027616.1.p1, GGJJ01028741.1.p1, GGJJ01031105.1.p1, GGJJ01038204.1.p1, GGJJ01039169.1.p1, GGJJ01041133.1.p1, GGJJ01042691.1.p1, …	GDQR01000185.1.p1, GDQR01000243.1.p1, GDQR01000758.1.p1, GDQR01004199.1.p1, GDQR01005176.1.p1, GDQR01007287.1.p1, GDQR01008604.1.p1, GDQR01013383.1.p1, GDQR01014077.1.p1, GDQR01018355.1.p1, GFLL01023426.1.p2, GFLL01044563.1.p1, GFLL01061620.1.p1, GFLL01063607.1.p1, GFLL01063608.1.p1, GFLL01070619.1.p1, GFLL01079059.1.p1, GFLL01079061.1.p1, GFLL01079064.1.p1, GFLL01081450.1.p1, GFLL01081453.1.p1, …	GGJH01001075.1.p1, GGJH01001529.1.p1, GGJH01001688.1.p1, GGJH01001963.1.p1, GGJH01002105.1.p1, GGJH01002168.1.p1, GGJH01002383.1.p1, GGJH01002624.1.p1, GGJH01004009.1.p1, GGJH01004591.1.p1, GGJH01006210.1.p1, GGJH01006736.1.p1, GGJH01008813.1.p1, GGJH01012188.1.p1, GGJH01015194.1.p1, GGJH01020304.1.p1, GGJH01022069.1.p1, GGJH01022687.1.p1, GGJH01022960.1.p1, GGJH01023006.1.p1, GGJH01023173.1.p1, …	HAMI01000408.1.p1, HAMI01001563.1.p1, HAMI01002493.1.p1, HAMI01005896.1.p1, HAMI01006249.1.p1, HAMI01006486.1.p1, HAMI01008870.1.p1, HAMI01012556.1.p1, HAMI01013911.1.p1, HAMI01014815.1.p1, HAMI01016629.1.p1, HAMI01023487.1.p1, HAMI01032788.1.p1, HAMI01034581.1.p1	GBLJ01000307.1.p1, GBLJ01002438.1.p1, GBLJ01002753.1.p1, GBLJ01002995.1.p1, GBLJ01004521.1.p1, GBLJ01005066.1.p1, GBLJ01005334.1.p1, GBLJ01005357.1.p1, GBLJ01006836.1.p1, GBLJ01006985.1.p1, GBLJ01011826.1.p1, GBLJ01014641.1.p1, GBLJ01015120.1.p1, GBLJ01017229.1.p1, GBLJ01023012.1.p1, GBLJ01029612.1.p1, gb|GESU01007822.1|.p1, gb|GESU01020373.1|.p1, gb|GESU01027642.1|.p1, gb|GESU01036338.1|.p1, gb|…	PILA_01885, PILA_01915, PILA_01971, PILA_02212, PILA_02591, PILA_02611, PILA_04574, PILA_05293, PILA_05868, PILA_06673, PILA_06792, PILA_07518, PILA_08017, PILA_08020, PILA_08074, PILA_08626, PILA_08896, PILA_09928, PILA_10850, PILA_10984, PILA_11441, PILA_12314, PILA_12539, PILA_16016, PILA_16300, PILA_16445, PILA_17068, PILA_17168, PILA_17968, PILA_18699, PILA_18810, PILA_18970, PILA_19566, PIL…	GAQR01011185.1.p1, GAQR01014565.1.p1, GAQR01015320.1.p1, GAQR01022731.1.p1, GAQR01025399.1.p1, GAQR01026069.1.p1, GAQR01027700.1.p1, GAQR01035804.1.p1, GAQR01035805.1.p1, GAQR01038148.1.p1, GAQR01038149.1.p1, GAQR01038152.1.p1, GAQR01042796.1.p1, GAQR01043488.1.p1, GAQR01057111.1.p1, GFHB01033201.1.p1, GFHB01062646.1.p1, GFHB01068837.1.p1, GFHB01087700.1.p1, GFHB01116625.1.p1, GFHB01118185.1.p1, …	GBQX01035475.1.p1, GBQX01035929.1.p1, GBQX01045950.1.p1, GBQX01048667.1.p1, GBQX01048678.1.p1, GBQX01050151.1.p1, GBQX01052156.1.p1, GDQD01000337.1.p1, GDQD01001575.1.p1, GDQD01002090.1.p1	GECO01001398.1.p1, GECO01004510.1.p1, GECO01006477.1.p1, GECO01007322.1.p1, GECO01008641.1.p1, GECO01010605.1.p1, GECO01013356.1.p1, GECO01015953.1.p1, GECO01016631.1.p1, GECO01016641.1.p1, GECO01020120.1.p1, GECO01021449.1.p1, GECO01024270.1.p1, GECO01024946.1.p1, GECO01026203.1.p1, GECO01027500.1.p1, GECO01030609.1.p1, GECO01031207.1.p1, GECO01031263.1.p1, GECO01032189.1.p1, GECO01033817.1.p1, …	GGJK01001192.1.p1, GGJK01001412.1.p1, GGJK01001557.1.p1, GGJK01001929.1.p1, GGJK01001985.1.p1, GGJK01002373.1.p1, GGJK01005599.1.p1, GGJK01006061.1.p1, GGJK01009790.1.p1, GGJK01010898.1.p1, GGJK01014211.1.p1, GGJK01016642.1.p1, GGJK01016782.1.p1, GGJK01018409.1.p1, GGJK01019111.1.p1, GGJK01019246.1.p1, GGJK01019463.1.p1, GGJK01019942.1.p1, GGJK01019992.1.p1, GGJK01021544.1.p1, GGJK01021949.1.p1, …	1A_I11_VO_L_1_T_174510_226447_1 C_0.000_Length_4714 type=cds; aalen=268_17%_complete-utrbad; clen=4714; strand=+; offs=766-1572; evgclass=main_okay_match_6A_I25_VO_L_5_T_98397_111482 C_0.000_Length_484_pct_98_94;, 1A_I11_VO_L_1_T_206532_226447_1 C_0.000_Length_3132 type=cds; aalen=287_27%_complete-utrbad; clen=3132; strand=+; offs=708-1571; evgclass=main_okay_match_1A_I11_VO_L_1_T_226253_226447 C…	GFZL01005856.1.p1, GFZL01008661.1.p1, GFZL01009205.1.p1, GFZL01013467.1.p1, GFZL01014393.1.p1, GFZL01014545.1.p1, GFZL01014718.1.p1, GFZL01017153.1.p1, GFZL01019106.1.p1, GFZL01019736.1.p1, GFZL01020305.1.p1, GFZL01020306.1.p1, GFZL01020491.1.p1, GFZL01020545.1.p1, GFZL01021616.1.p1, GFZL01023515.1.p1, GFZL01023990.1.p1, GFZL01025286.1.p1, GFZL01025556.1.p1, GFZL01025682.1.p1, GFZL01025689.1.p1, …	GAZW02038796.1.p1, GAZW02038797.1.p1, GAZW02043125.1.p1, GAZW02045012.1.p1, GAZW02045904.1.p1, GAZW02051420.1.p1, GAZW02063594.1.p1, GAZW02063601.1.p1, GAZW02063602.1.p1, GAZW02063605.1.p1, GAZW02064838.1.p1, GAZW02074458.1.p1, GAZW02074461.1.p1, GAZW02074462.1.p1, GAZW02076185.1.p1, GAZW02076186.1.p1, GAZW02087212.1.p1, GAZW02101467.1.p1, GFFY01003549.1.p1, GFFY01003828.1.p1, GFFY01004614.1.p2, …	Thoc_c20033_g3_i1.p1, Thoc_c20266_g1_i2.p1, Thoc_c23103_g1_i1.p1, Thoc_c23848_g1_i1.p1, Thoc_c23856_g1_i1.p1, Thoc_c23856_g1_i2.p1, Thoc_c26297_g3_i2.p1, Thoc_c27189_g1_i1.p1, Thoc_c27970_g2_i2.p1, Thoc_c27970_g3_i1.p1, Thoc_c28130_g2_i1.p1, Thoc_c28130_g3_i3.p1, Thoc_c28583_g3_i1.p1, Thoc_c28583_g3_i2.p1, Thoc_c35204_g1_i1.p1, Thoc_c41956_g1_i1.p1, Thoc_c6855_g2_i1.p1	SEGI_00731, SEGI_02473, SEGI_03084, SEGI_03111, SEGI_03576, SEGI_06047, SEGI_06831, SEGI_07025, SEGI_08546, SEGI_09169, SEGI_09241, SEGI_09857, SEGI_10009, SEGI_10208, SEGI_10837, SEGI_13225, SEGI_13828, SEGI_13932, SEGI_14465, SEGI_16083, SEGI_17730, SEGI_18969, SEGI_19730, SEGI_19773, SEGI_21785, SEGI_21789, SEGI_22007, SEGI_23296, SEGI_23396, SEGI_25902, SEGI_27236, SEGI_27573, SEGI_28684, SEG…	SESE_002158, SESE_006053, SESE_006715, SESE_007169, SESE_008509, SESE_008732, SESE_010022, SESE_013065, SESE_015675, SESE_020777, SESE_023383, SESE_026567, SESE_026777, SESE_027299, SESE_027409, SESE_028620, SESE_029325, SESE_030942, SESE_030966, SESE_032226, SESE_032373, SESE_033377, SESE_033455, SESE_033505, SESE_033556, SESE_034444, SESE_034653, SESE_034842, SESE_036423, SESE_036560, SESE_0373…
OG0000008	GGJG01023535.1.p1, GGJG01025060.1.p1, GGJG01026013.1.p1, GGJG01029337.1.p2, GGJG01033017.1.p1, GGJG01033254.1.p1, GGJG01035077.1.p1, GGJG01035254.1.p1, GGJG01041498.1.p1		GBYR01013156.1.p1, GBYR01015028.1.p1, GBYR01019256.1.p1, GBYR01035894.1.p1, GBYR01037167.1.p1, GBYR01037173.1.p1, GBYR01038773.1.p1, GBYR01039702.1.p1, GBYR01044863.1.p1, GGBW01000027.1.p2, GGBW01000370.1.p1, GGBW01004098.1.p1, GGBW01004102.1.p1, GGBW01005844.1.p1, GGBW01006250.1.p2, GGBW01016982.1.p1, GGBW01035962.1.p2, GGBW01040963.1.p1, GGBW01041316.1.p1, GGBW01045267.1.p1, GGBW01046797.1.p3, …		Megl_c12065_g1_i1.p1, Megl_c14413_g1_i1.p1, Megl_c17364_g1_i1.p1, Megl_c22317_g1_i2.p1, Megl_c28212_g5_i2.p1, Megl_c28602_g2_i1.p3, Megl_c28636_g2_i2.p1, Megl_c28636_g3_i1.p1, Megl_c28637_g1_i2.p1, Megl_c48383_g1_i1.p1, Megl_c7163_g1_i1.p1	GCHX01045491.1.p1, GCHX01049352.1.p1, GCHX01053415.1.p1, GCHX01054054.1.p1, GCHX01145455.1.p3, GCHX01150633.1.p1, GCHX01150693.1.p1, GCHX01153792.1.p1, GCHX01155043.1.p1, GCHX01245343.1.p1, GCHX01250666.1.p1, GCHX01251157.1.p1, GCHX01255063.1.p1, GCHX01346055.1.p1, GCHX01446789.1.p1, GCHX01450892.1.p1, GCHX01452775.1.p1, GCZO01001011.1.p1, GCZO01002383.1.p1, GCZO01002607.1.p1, GCZO01002789.1.p1, …	GGJJ01004549.1.p1, GGJJ01005890.1.p1, GGJJ01011724.1.p1, GGJJ01012907.1.p1, GGJJ01018781.1.p2, GGJJ01023134.1.p1, GGJJ01023965.1.p1, GGJJ01024320.1.p1, GGJJ01025041.1.p1, GGJJ01025340.1.p1, GGJJ01026238.1.p1, GGJJ01028326.1.p1, GGJJ01028889.1.p1, GGJJ01031697.1.p1, GGJJ01032482.1.p1, GGJJ01034614.1.p1, GGJJ01035662.1.p1, GGJJ01037992.1.p2, GGJJ01038634.1.p1, GGJJ01038802.1.p1, GGJJ01038874.1.p1, …	GDQR01005645.1.p1, GDQR01006394.1.p1, GDQR01014732.1.p1, GFLL01002461.1.p1, GFLL01004378.1.p1, GFLL01038251.1.p1, GFLL01039348.1.p1, GFLL01045065.1.p1, GFLL01061481.1.p1, GFLL01061860.1.p1, GFLL01089855.1.p1, GFLL01090614.1.p1, GFLL01097707.1.p1, GFLL01101283.1.p1, GFLL01102400.1.p1, GFLL01111192.1.p1, GFLL01111194.1.p1, GFLL01111209.1.p1, GFLL01114262.1.p1, GFLL01122864.1.p1, GFLL01122866.1.p1, …	GGJH01006349.1.p1, GGJH01006580.1.p1, GGJH01018102.1.p1, GGJH01020124.1.p1, GGJH01027104.1.p2, GGJH01027729.1.p1, GGJH01030884.1.p1, GGJH01037203.1.p1, GGJH01037352.1.p1, GGJH01045296.1.p1	HAMI01004413.1.p1, HAMI01014822.1.p1, HAMI01016340.1.p1, HAMI01017146.1.p1, HAMI01017264.1.p1, HAMI01020254.1.p1	GBLJ01002501.1.p1, GBLJ01002682.1.p1, GBLJ01005732.1.p1, GBLJ01012095.1.p1, GBLJ01014719.1.p1, GBLJ01016435.1.p1, GBLJ01021077.1.p1, GBLJ01021399.1.p1, GBLJ01022351.1.p1, GBLJ01023864.1.p1, GBLJ01030859.1.p1, GBLJ01031935.1.p1, GBLJ01034410.1.p1, gb|GESU01013993.1|.p1, gb|GESU01014006.1|.p1, gb|GESU01015916.1|.p1, gb|GESU01024687.1|.p1, gb|GESU01028764.1|.p1, gb|GESU01030437.1|.p1, gb|GESU0103172…	PILA_00563, PILA_08535, PILA_29448, PILA_30967	GFHB01006679.1.p1, GFHB01007181.1.p1, GFHB01022726.1.p1, GFHB01032301.1.p2, GFHB01042182.1.p1, GFHB01045679.1.p1, GFHB01070472.1.p1, GFHB01086038.1.p1, GFHB01097268.1.p1, GFHB01135838.1.p1, GFHB01151509.1.p1, GFHB01168852.1.p1, GFHB01169256.1.p1, GFHB01170426.1.p1, GFHB01184311.1.p1	GBQX01020090.1.p1, GBQX01024550.1.p1, GBQX01025193.1.p1, GDQD01002687.1.p1, GDQD01005405.1.p1, GDQD01006702.1.p1	GECO01002170.1.p1, GECO01005714.1.p1, GECO01011919.1.p1, GECO01019811.1.p1, GECO01021865.1.p1, GECO01022503.1.p1, GECO01030572.1.p1, GECO01033713.1.p1, GECO01048182.1.p1, GGAU01000684.1.p2, GGAU01001392.1.p1, GGAU01014296.1.p3, GGAU01015792.1.p1, GGAU01018508.1.p1, GGAU01018558.1.p1, GGAU01023290.1.p1, GGAU01024806.1.p1, GGAU01025882.1.p1, GGAU01028829.1.p1, GGAU01029175.1.p2, GGAU01037513.1.p1, …	GGJK01005722.1.p1, GGJK01018942.1.p1, GGJK01023247.1.p1, GGJK01027854.1.p1, GGJK01029591.1.p1, GGJK01036719.1.p2, GGJK01041937.1.p1, GGJK01043305.1.p1	1A_I3_VO_L_1_T_136416_136734_1 C_0.000_Length_1392 type=cds; aalen=296_64%_complete; clen=1392; strand=-; offs=1200-310; evgclass=main_okay_match_1A_I3_VO_L_1_T_136408_136734 C_0.000_Length_816_pct_99_100;, 1A_I5_VO_L_1_T_46773_64687_1 C_0.000_Length_3044 type=cds; aalen=401_39%_complete-utrbad; clen=3044; strand=-; offs=1632-427; evgclass=main_okay_match_5A_I7_VO_L_1_T_10377_95833 C_0.000_Length…	GFZL01000688.1.p1, GFZL01002656.1.p1, GFZL01013478.1.p1, GFZL01014077.1.p1, GFZL01014362.1.p1, GFZL01014654.1.p1, GFZL01016658.1.p1, GFZL01019087.1.p1, GFZL01019154.1.p1, GFZL01019401.1.p2, GFZL01019423.1.p1, GFZL01019541.1.p1, GFZL01019556.1.p1, GFZL01019685.1.p1, GFZL01021354.1.p1, GFZL01022104.1.p1, GFZL01024488.1.p1, GFZL01024525.1.p1, GFZL01025963.1.p1, GFZL01026814.1.p1, GFZL01026849.1.p1, …	GAZW02005568.1.p1, GAZW02008682.1.p1, GAZW02014985.1.p1, GAZW02015821.1.p1, GAZW02015933.1.p1, GAZW02025284.1.p1, GAZW02033426.1.p2, GAZW02041794.1.p1, GAZW02044760.1.p1, GAZW02061864.1.p1, GAZW02063133.1.p1, GAZW02066472.1.p1, GAZW02078489.1.p1, GAZW02100362.1.p1, GAZW02100448.1.p1, GAZW02102588.1.p1, GFFY01000407.1.p1, GFFY01002836.1.p2, GFFY01003197.1.p3, GFFY01007079.1.p1, GFFY01009388.1.p1, …	Thoc_c163_g1_i1.p1, Thoc_c23265_g1_i1.p2, Thoc_c3915_g1_i1.p1, Thoc_c46667_g1_i1.p1	SEGI_00700, SEGI_04023, SEGI_05278, SEGI_06617, SEGI_09349, SEGI_09543, SEGI_12557, SEGI_12688, SEGI_14347, SEGI_14841, SEGI_15284, SEGI_16303, SEGI_16919, SEGI_17021, SEGI_18949, SEGI_19334, SEGI_19772, SEGI_25619, SEGI_25877, SEGI_25896, SEGI_27154, SEGI_28061, SEGI_28218, SEGI_30858, SEGI_31008, SEGI_32107, SEGI_32512, SEGI_32599, SEGI_32942, SEGI_34127, SEGI_34199, SEGI_36378, SEGI_38000, SEG…	SESE_018850, SESE_025967, SESE_026361, SESE_026884, SESE_026937, SESE_028041, SESE_028077, SESE_028188, SESE_028949, SESE_029532, SESE_030299, SESE_031138, SESE_032165, SESE_032306, SESE_032658, SESE_035032, SESE_035077, SESE_035292, SESE_036204, SESE_036481, SESE_036524, SESE_036650, SESE_036785, SESE_037532, SESE_037627, SESE_037995, SESE_038295, SESE_038601, SESE_038616, SESE_038721, SESE_0397…
OG0000009	GGJG01001801.1.p2, GGJG01010055.1.p1, GGJG01013417.1.p1, GGJG01019755.1.p1, GGJG01024438.1.p1, GGJG01024521.1.p1, GGJG01026349.1.p1, GGJG01026350.1.p1, GGJG01026436.1.p1, GGJG01027529.1.p1, GGJG01028493.1.p1, GGJG01028822.1.p1, GGJG01029625.1.p1, GGJG01032222.1.p1, GGJG01032764.1.p1, GGJG01033370.1.p1, GGJG01034741.1.p1, GGJG01038495.1.p2, GGJG01040490.1.p1, GGJG01040624.1.p1, GGJG01044080.1.p1		GBYR01039048.1.p1, GGBW01010779.1.p1, GGBW01049028.1.p1, GGBW01053263.1.p1, GGBW01071095.1.p1, GHLL01183085.1.p1, GHLL01230045.1.p1, GHLL01446001.1.p1, Gb_01393, Gb_06233, Gb_11370, Gb_12645, Gb_41820	TnS000283031t06, TnS000913013t05, TnS000920283t02, TnS001041253t01		GCHX01048467.1.p1, GCHX01053612.1.p1, GCHX01147303.1.p1, GCHX01147840.1.p1, GCHX01255117.1.p1, GCHX01348797.1.p1, GCHX01354302.1.p2, GCHX01446261.1.p1, GCZO01001005.1.p1, GCZO01003414.1.p1, GCZO01104092.1.p1, GCZO01107672.1.p1, GCZO01205598.1.p1, GCZO01207339.1.p1, GCZO01207536.1.p2, GCZO01208807.1.p1, GCZO01208967.1.p1, GCZO01301067.1.p1, GCZO01302027.1.p1, GCZO01303817.1.p2, GCZO01304280.1.p2, …	GGJJ01001839.1.p1, GGJJ01003408.1.p1, GGJJ01004159.1.p1, GGJJ01005151.1.p1, GGJJ01005885.1.p1, GGJJ01010267.1.p1, GGJJ01020840.1.p1, GGJJ01021365.1.p1, GGJJ01021366.1.p1, GGJJ01022381.1.p1, GGJJ01022922.1.p1, GGJJ01026093.1.p1, GGJJ01026566.1.p1, GGJJ01026772.1.p1, GGJJ01027326.1.p1, GGJJ01027568.1.p1, GGJJ01032756.1.p1, GGJJ01032999.1.p1, GGJJ01033917.1.p1, GGJJ01034811.1.p1, GGJJ01034956.1.p1, …	GDQR01000643.1.p1, GDQR01004307.1.p1, GDQR01004463.1.p1, GDQR01004880.1.p1, GDQR01005099.1.p1, GDQR01007235.1.p1, GDQR01009559.1.p1, GDQR01010799.1.p1, GDQR01010913.1.p1, GDQR01011120.1.p1, GDQR01017146.1.p1, GDQR01018211.1.p1, GDQR01020526.1.p1, GDQR01020790.1.p1, GDQR01020811.1.p1, GFLL01004885.1.p1, GFLL01004924.1.p1, GFLL01025261.1.p1, GFLL01032544.1.p1, GFLL01043370.1.p1, GFLL01062352.1.p1, …	GGJH01004179.1.p1, GGJH01004398.1.p1, GGJH01007361.1.p1, GGJH01008865.1.p1, GGJH01010254.1.p1, GGJH01012096.1.p1, GGJH01012506.1.p1, GGJH01012574.1.p1, GGJH01015894.1.p1, GGJH01016103.1.p1, GGJH01017184.1.p1, GGJH01017421.1.p1, GGJH01017874.1.p1, GGJH01017974.1.p1, GGJH01018805.1.p1, GGJH01019459.1.p1, GGJH01019651.1.p1, GGJH01019861.1.p1, GGJH01020326.1.p1, GGJH01024602.1.p1, GGJH01026140.1.p1, …	HAMI01003826.1.p1, HAMI01005577.1.p1, HAMI01006024.1.p1, HAMI01006750.1.p1, HAMI01007543.1.p1, HAMI01008060.1.p1, HAMI01008551.1.p1, HAMI01013057.1.p1, HAMI01013429.1.p1, HAMI01013808.1.p1, HAMI01014369.1.p2, HAMI01014432.1.p1, HAMI01014861.1.p1, HAMI01015548.1.p1, HAMI01015942.1.p1, HAMI01016422.1.p1, HAMI01016469.1.p1, HAMI01017124.1.p1, HAMI01018511.1.p1, HAMI01018744.1.p1, HAMI01019919.1.p1, …	GBLJ01000005.1.p1, GBLJ01000073.1.p1, GBLJ01001321.1.p1, GBLJ01002685.1.p1, GBLJ01002784.1.p1, GBLJ01002922.1.p1, GBLJ01004094.1.p1, GBLJ01004248.1.p1, GBLJ01006155.1.p1, GBLJ01006837.1.p1, GBLJ01007447.1.p1, GBLJ01008065.1.p1, GBLJ01008185.1.p1, GBLJ01009505.1.p1, GBLJ01011796.1.p1, GBLJ01012583.1.p1, GBLJ01013402.1.p1, GBLJ01015144.1.p1, GBLJ01015197.1.p1, GBLJ01017313.1.p1, GBLJ01018984.1.p1, …	PILA_01178, PILA_02384, PILA_03809, PILA_04338, PILA_04896, PILA_07470, PILA_09869, PILA_11417, PILA_11709, PILA_12780, PILA_13598, PILA_14443, PILA_16034, PILA_25865, PILA_28659, PILA_35723, PILA_37845, PILA_38252, gb|GEUZ01001745.1|.p1, gb|GEUZ01002366.1|.p1, gb|GEUZ01002916.1|.p1, gb|GEUZ01003017.1|.p1, gb|GEUZ01003244.1|.p1, gb|GEUZ01003857.1|.p1, gb|GEUZ01004002.1|.p1, gb|GEUZ01004224.1|.p1,…	GAQR01011789.1.p1, GAQR01016921.1.p1, GAQR01018010.1.p1, GAQR01025331.1.p1, GAQR01025640.1.p1, GAQR01025641.1.p1, GAQR01034897.1.p1, GAQR01038117.1.p1, GAQR01042875.1.p1, GAQR01044612.1.p2, GAQR01056367.1.p1, GAQR01057452.1.p1, GAQR01058473.1.p1, GAQR01059033.1.p1, GAQR01062032.1.p1, GAQR01063344.1.p1, GFHB01000102.1.p1, GFHB01002898.1.p1, GFHB01015022.1.p1, GFHB01017554.1.p1, GFHB01020886.1.p1, …	GBQX01022413.1.p1, GBQX01023233.1.p1, GBQX01024819.1.p1, GBQX01027292.1.p1, GBQX01028425.1.p1, GBQX01032492.1.p1, GBQX01033052.1.p1, GBQX01033890.1.p1, GBQX01035815.1.p1, GBQX01036143.1.p1, GBQX01037787.1.p1, GBQX01042770.1.p1, GBQX01043065.1.p1, GBQX01043507.1.p1, GBQX01044027.1.p1, GBQX01044156.1.p1, GBQX01047240.1.p1, GBQX01048432.1.p1, GBQX01048446.1.p1, GDQD01001324.1.p1, GDQD01005997.1.p1, …	GECO01010702.1.p1, GECO01012885.1.p1, GECO01013067.1.p1, GECO01013266.1.p1, GECO01013420.1.p1, GECO01014150.1.p1, GECO01014664.1.p1, GECO01015005.1.p1, GECO01016757.1.p1, GECO01016816.1.p1, GECO01017552.1.p1, GECO01018739.1.p1, GECO01018773.1.p1, GECO01021063.1.p1, GECO01022050.1.p1, GECO01025392.1.p1, GECO01026074.1.p1, GECO01028438.1.p1, GECO01028939.1.p1, GECO01029739.1.p1, GECO01030048.1.p1, …	GGJK01003863.1.p1, GGJK01004661.1.p1, GGJK01005695.1.p1, GGJK01006621.1.p1, GGJK01010065.1.p1, GGJK01012314.1.p1, GGJK01013689.1.p1, GGJK01018524.1.p1, GGJK01019139.1.p1, GGJK01019958.1.p1, GGJK01020403.1.p1, GGJK01022433.1.p1, GGJK01023242.1.p1, GGJK01024011.1.p1, GGJK01024764.1.p1, GGJK01024938.1.p1, GGJK01026303.1.p1, GGJK01027050.1.p1, GGJK01027995.1.p1, GGJK01028173.1.p1, GGJK01028460.1.p1, …	1A_I11_VO_L_1_T_216507_226447_1 C_0.000_Length_1282 type=cds; aalen=364_85%_complete; clen=1282; strand=+; offs=119-1213; evgclass=main_okay_match_1A_I11_VO_L_1_T_216506_226447 C_0.000_Length_1244_pct_99_98;, 1A_I3_VO_L_1_T_129120_136734_1 C_0.000_Length_1298 type=cds; aalen=225_52%_complete-utrpoor; clen=1298; strand=-; offs=1263-586; evgclass=main_okay_match_3A_I18_NT_comp37149_c0_seq5_pct_98_8…	GFZL01002259.1.p1, GFZL01009768.1.p1, GFZL01012126.1.p1, GFZL01012589.1.p1, GFZL01013550.1.p1, GFZL01013703.1.p1, GFZL01014746.1.p1, GFZL01016899.1.p1, GFZL01016905.1.p1, GFZL01016960.1.p1, GFZL01017025.1.p1, GFZL01019183.1.p1, GFZL01019786.1.p1, GFZL01019919.1.p1, GFZL01019988.1.p1, GFZL01020198.1.p1, GFZL01020607.1.p1, GFZL01020860.1.p1, GFZL01021133.1.p1, GFZL01021188.1.p1, GFZL01023544.1.p1, …	GAZW02014757.1.p1, GAZW02015958.1.p1, GAZW02019118.1.p1, GAZW02028533.1.p2, GAZW02033598.1.p1, GAZW02037916.1.p1, GAZW02037920.1.p1, GAZW02044313.1.p1, GAZW02045942.1.p2, GAZW02045943.1.p1, GAZW02047973.1.p1, GAZW02048131.1.p1, GAZW02051041.1.p1, GAZW02057272.1.p1, GAZW02060918.1.p1, GAZW02061329.1.p1, GAZW02062444.1.p1, GAZW02064855.1.p1, GAZW02065792.1.p1, GAZW02066270.1.p1, GAZW02066273.1.p1, …	Thoc_c8022_g1_i1.p1	SEGI_03848, SEGI_34644	SESE_149142
OG0000010	GGJG01006785.1.p1, GGJG01023021.1.p1, GGJG01028489.1.p1, GGJG01029417.1.p1, GGJG01030562.1.p1, GGJG01032285.1.p1, GGJG01038079.1.p1, GGJG01043633.1.p1		GBYR01014342.1.p1, GBYR01027063.1.p1, GBYR01029962.1.p1, GBYR01033147.1.p1, GBYR01038121.1.p1, GGBW01002789.1.p1, GGBW01004557.1.p2, GGBW01018628.1.p1, GGBW01019006.1.p1, GGBW01030124.1.p2, GGBW01030127.1.p1, GGBW01033191.1.p1, GGBW01035954.1.p1, GGBW01041664.1.p1, GGBW01047631.1.p1, GGBW01055525.1.p1, GHLL01108764.1.p2, GHLL01178604.1.p1, GHLL01178613.1.p1, GHLL01178615.1.p1, GHLL01192758.1.p1, …		Megl_c12574_g1_i1.p1, Megl_c14416_g1_i1.p1, Megl_c28636_g2_i2.p3, Megl_c38699_g1_i1.p1, Megl_c42379_g1_i1.p1, Megl_c8919_g1_i1.p1	GCHX01045320.1.p1, GCHX01046120.1.p1, GCHX01049228.1.p1, GCHX01050794.1.p1, GCHX01053329.1.p1, GCHX01054242.1.p1, GCHX01054649.1.p1, GCHX01145866.1.p1, GCHX01146383.1.p1, GCHX01247556.1.p1, GCHX01248693.1.p1, GCHX01253239.1.p1, GCHX01254532.1.p1, GCHX01254711.1.p1, GCHX01345370.1.p1, GCHX01345674.1.p1, GCHX01348215.1.p1, GCHX01349726.1.p1, GCHX01352509.1.p1, GCHX01452222.1.p1, GCHX01454719.1.p1, …	GGJJ01023991.1.p1, GGJJ01026822.1.p1, GGJJ01028850.1.p1, GGJJ01030488.1.p1, GGJJ01032492.1.p1, GGJJ01034010.1.p1, GGJJ01036160.1.p1, GGJJ01037207.1.p1, GGJJ01038569.1.p1, GGJJ01038705.1.p1, GGJJ01039800.1.p1, GGJJ01040545.1.p1, GGJJ01041621.1.p1, GGJJ01042323.1.p1, GGJJ01043966.1.p1, GGJJ01045415.1.p1, GGJJ01047450.1.p1, GGJJ01051115.1.p1, GGJJ01052391.1.p2, GGJJ01052861.1.p1, GGJJ01056065.1.p1	GDQR01018198.1.p1, GDQR01018542.1.p1, GFLL01004248.1.p1, GFLL01005752.1.p1, GFLL01009733.1.p1, GFLL01009993.1.p1, GFLL01014299.1.p1, GFLL01018958.1.p1, GFLL01028071.1.p1, GFLL01028726.1.p1, GFLL01035298.1.p1, GFLL01038923.1.p1, GFLL01043835.1.p1, GFLL01048100.1.p1, GFLL01054172.1.p1, GFLL01054613.1.p1, GFLL01061287.1.p1, GFLL01076347.1.p1, GFLL01082342.1.p1, GFLL01105024.1.p1, GFLL01107360.1.p1, …	GGJH01008836.1.p1, GGJH01018441.1.p1, GGJH01019849.1.p3, GGJH01020271.1.p1, GGJH01021368.1.p1, GGJH01023957.1.p1, GGJH01026706.1.p1, GGJH01030620.1.p1, GGJH01033883.1.p1, GGJH01038578.1.p1, GGJH01040046.1.p3, GGJH01041673.1.p1	HAMI01001219.1.p1, HAMI01004200.1.p2, HAMI01006193.1.p1, HAMI01006563.1.p1, HAMI01008165.1.p1, HAMI01010453.1.p1, HAMI01011907.1.p1, HAMI01015636.1.p1, HAMI01016518.1.p1, HAMI01018977.1.p1, HAMI01019889.1.p1, HAMI01023940.1.p1, HAMI01024712.1.p1, HAMI01032620.1.p1, HAMI01035661.1.p1	GBLJ01002330.1.p1, GBLJ01005988.1.p1, GBLJ01006338.1.p1, GBLJ01007174.1.p1, GBLJ01007243.1.p1, GBLJ01007865.1.p1, GBLJ01009053.1.p1, GBLJ01010242.1.p1, GBLJ01014349.1.p1, GBLJ01019560.1.p1, GBLJ01020479.1.p1, GBLJ01030523.1.p1, GBLJ01032895.1.p1, GBLJ01033032.1.p1, GBLJ01034284.1.p1, GBLJ01045090.1.p1, GBLJ01046553.1.p1, gb|GESU01013367.1|.p1, gb|GESU01014661.1|.p1, gb|GESU01016624.1|.p1, gb|GESU…	PILA_01817	GFHB01003814.1.p1, GFHB01024916.1.p1, GFHB01050988.1.p1, GFHB01060021.1.p1, GFHB01060224.1.p1, GFHB01063938.1.p1, GFHB01070679.1.p1, GFHB01078900.1.p1, GFHB01096109.1.p1, GFHB01097076.1.p1, GFHB01099806.1.p1, GFHB01144796.1.p1, GFHB01149930.1.p1, GFHB01153219.1.p3, GFHB01161442.1.p1, GFHB01167190.1.p1, GFHB01175335.1.p1, GFHB01175771.1.p1	GBQX01015321.1.p1, GBQX01021824.1.p1, GBQX01025812.1.p1, GBQX01037703.1.p1, GBQX01047749.1.p1, GDQD01006104.1.p1	GECO01000617.1.p1, GECO01001491.1.p1, GECO01001952.1.p1, GECO01008565.1.p1, GECO01012280.1.p1, GECO01013275.1.p1, GECO01013525.1.p1, GECO01013553.1.p1, GECO01029286.1.p1, GECO01029288.1.p1, GECO01039563.1.p1, GECO01049815.1.p1, GECO01050691.1.p1, GGAU01003614.1.p1, GGAU01018427.1.p1, GGAU01018493.1.p1, GGAU01021146.1.p1, GGAU01022811.1.p2, GGAU01023347.1.p1, GGAU01023769.1.p1, GGAU01026052.1.p2, …	GGJK01022013.1.p1, GGJK01022633.1.p1, GGJK01023465.1.p1, GGJK01025914.1.p3, GGJK01026347.1.p1, GGJK01037455.1.p2, GGJK01038296.1.p1, GGJK01040921.1.p1, GGJK01041075.1.p2, GGJK01041761.1.p1, GGJK01043857.1.p1	1A_I11_VO_L_1_T_223332_226447_1 C_0.000_Length_571 type=cds; aalen=181_95%_complete; clen=571; strand=-; offs=546-1; evgclass=main_okay_match_1A_I11_VO_L_1_T_223336_226447 C_0.000_Length_533_pct_99_93;, 1A_I8_VO_L_47095_T_18_21_1 C_0.297_Length_665 type=cds; aalen=181_82%_complete; clen=665; strand=+; offs=30-575; evgclass=main_okay_match_1A_I8_VO_L_47095_T_17_21 C_0.271_Length_686_pct_99_95;, 1A…	GFZL01009793.1.p1, GFZL01011474.1.p1, GFZL01012648.1.p2, GFZL01014102.1.p1, GFZL01014193.1.p1, GFZL01014250.1.p1, GFZL01014765.1.p1, GFZL01014766.1.p1, GFZL01014877.1.p1, GFZL01015440.1.p1, GFZL01017443.1.p1, GFZL01019142.1.p1, GFZL01019301.1.p1, GFZL01019616.1.p1, GFZL01019697.1.p1, GFZL01019854.1.p2, GFZL01021004.1.p1, GFZL01021968.1.p1, GFZL01022335.1.p1, GFZL01024286.1.p1, GFZL01025043.1.p1, …	GAZW02002421.1.p1, GAZW02009276.1.p1, GAZW02009292.1.p1, GAZW02010891.1.p1, GAZW02014080.1.p1, GAZW02015016.1.p1, GAZW02016791.1.p1, GAZW02025078.1.p1, GAZW02053557.1.p1, GAZW02062185.1.p1, GAZW02062716.1.p1, GAZW02067270.1.p1, GAZW02067304.1.p1, GAZW02070502.1.p1, GAZW02072246.1.p1, GAZW02088897.1.p1, GAZW02091917.1.p1, GAZW02094819.1.p1, GAZW02096231.1.p1, GFFY01000033.1.p1, GFFY01001133.1.p1, …	Thoc_c11650_g1_i1.p1, Thoc_c19230_g1_i1.p1, Thoc_c27855_g3_i1.p1, Thoc_c27855_g3_i1.p2, Thoc_c29017_g5_i1.p1, Thoc_c32219_g1_i1.p2, Thoc_c32558_g1_i1.p1, Thoc_c48037_g1_i1.p2	SEGI_06218, SEGI_06978, SEGI_08577, SEGI_12370, SEGI_18018, SEGI_20729, SEGI_21007, SEGI_23153, SEGI_24976, SEGI_31302, SEGI_34791, SEGI_37188, SEGI_39698, SEGI_39758	SESE_018749, SESE_025651, SESE_028227, SESE_029011, SESE_029677, SESE_030466, SESE_030519, SESE_030671, SESE_032358, SESE_032803, SESE_032848, SESE_032886, SESE_033066, SESE_033086, SESE_033369, SESE_033829, SESE_033918, SESE_034433, SESE_034538, SESE_034571, SESE_034639, SESE_034757, SESE_034772, SESE_035112, SESE_036455, SESE_036471, SESE_036540, SESE_036841, SESE_037563, SESE_037710, SESE_0382…
OG0000011	GGJG01000841.1.p1, GGJG01001735.1.p1, GGJG01001895.1.p1, GGJG01002074.1.p1, GGJG01002075.1.p1, GGJG01002431.1.p1, GGJG01002530.1.p1, GGJG01006685.1.p1, GGJG01011606.1.p1, GGJG01014940.1.p1, GGJG01019946.1.p1, GGJG01020210.1.p1, GGJG01023517.1.p1, GGJG01025132.1.p1, GGJG01025428.1.p1, GGJG01026342.1.p1, GGJG01029314.1.p1, GGJG01029764.1.p1, GGJG01029830.1.p1, GGJG01030615.1.p1, GGJG01035667.1.p1, …	evm_27.model.AmTr_v1.0_scaffold00174.12 pacid=31561008 transcript=evm_27.model.AmTr_v1.0_scaffold00174.12 locus=evm_27.TU.AmTr_v1.0_scaffold00174.12 ID=evm_27.model.AmTr_v1.0_scaffold00174.12.v1.0 annot-version=v1.0	GBYR01024241.1.p1, GBYR01032995.1.p1, GBYR01037217.1.p1, GBYR01037222.1.p1, GGBW01050999.1.p1, GGBW01051003.1.p1, GGBW01051004.1.p1, GHLL01238105.1.p1, GHLL01277325.1.p2, GHLL01290779.1.p1, Gb_01677, Gb_04401, Gb_05138, Gb_11342, Gb_20074, Gb_24536, Gb_29955, Gb_32737, Gb_41038, Gb_41167	TnS000033513t01, TnS000044755t02, TnS000044755t05, TnS000044755t08, TnS000093273t01, TnS000100931t01, TnS000113049t01, TnS000150471t01, TnS000200575t03, TnS000396683t02, TnS000450743t01, TnS000481149t01, TnS000481149t02, TnS000498063t19, TnS000528123t01, TnS000528123t02, TnS000715507t01, TnS000780101t01, TnS000780101t03, TnS000782909t04, TnS000899267t03, TnS000899267t04, TnS000899267t05, TnS00092…	Megl_c21451_g1_i1.p1, Megl_c27717_g1_i1.p1, Megl_c27717_g1_i5.p1, Megl_c28540_g2_i10.p1, Megl_c28540_g2_i12.p1, Megl_c28540_g3_i3.p1, Megl_c32192_g1_i1.p1	GCHX01152616.1.p1, GCHX01153351.1.p1, GCHX01351771.1.p1, GCHX01447251.1.p1, GCHX01449622.1.p1, GCHX01453487.1.p1, GCZO01102867.1.p1, GQ02014_G23.1, GQ0207_I23.1, GQ03901_K02.1, PG01r131103s167065340--1690-74, PG01r131103s167824769--6810-5353, PG01r131103s168248791--95037-98532--pseudo--s1--fs, PG01r131103s168383140--455987-456318--pseudo--fs, PG01r131103s168473611--39-1754, contig02731--2648-1275…	GGJJ01000899.1.p1, GGJJ01001950.1.p1, GGJJ01002135.1.p1, GGJJ01011845.1.p1, GGJJ01012862.1.p1, GGJJ01021851.1.p1, GGJJ01022811.1.p1, GGJJ01032888.1.p1, GGJJ01033514.1.p1, GGJJ01035182.1.p1, GGJJ01040364.1.p1, GGJJ01041374.1.p1	GDQR01004336.1.p1, GDQR01004967.1.p1, GDQR01010417.1.p1, GDQR01010822.1.p1, GDQR01015854.1.p1, GDQR01016065.1.p1, GDQR01018641.1.p1, GDQR01023158.1.p1, GFLL01054567.1.p1, GFLL01067928.1.p1, GFLL01069126.1.p1, GFLL01078067.1.p1, GFLL01095025.1.p1, GFLL01109852.1.p1, gb|GFBO01042352.1|.p1, gb|GFBO01051516.1|.p1	GGJH01004195.1.p1, GGJH01004196.1.p1, GGJH01007908.1.p1, GGJH01010580.1.p1, GGJH01011774.1.p1, GGJH01014086.1.p3, GGJH01014479.1.p1, GGJH01014526.1.p1, GGJH01016678.1.p1, GGJH01017781.1.p1, GGJH01023307.1.p1, GGJH01025893.1.p1, GGJH01028257.1.p1, GGJH01029133.1.p1, GGJH01030057.1.p1, GGJH01030774.1.p1, GGJH01043174.1.p1	HAMI01000714.1.p1, HAMI01001790.1.p1, HAMI01003113.1.p1, HAMI01006810.1.p1, HAMI01007841.1.p1, HAMI01011629.1.p1, HAMI01011721.1.p1, HAMI01012604.1.p1, HAMI01013926.1.p1, HAMI01015666.1.p1, HAMI01017821.1.p1, HAMI01020053.1.p1, HAMI01023632.1.p1, HAMI01023814.1.p1, HAMI01024379.1.p2, HAMI01024864.1.p1, HAMI01025848.1.p2, HAMI01027773.1.p1, HAMI01035058.1.p1	GBLJ01001324.1.p1, GBLJ01010720.1.p1, GBLJ01011394.1.p1, GBLJ01017149.1.p1, GBLJ01029313.1.p1, GBLJ01035930.1.p1, GBLJ01041585.1.p1, gb|GESU01012234.1|.p1, gb|GESU01012935.1|.p1, gb|GESU01041640.1|.p1	PILA_00182, PILA_00192, PILA_00385, PILA_00386, PILA_03285, PILA_03950, PILA_03951, PILA_05131, PILA_06750, PILA_07317, PILA_08600, PILA_09049, PILA_09053, PILA_11044, PILA_12349, PILA_13090, PILA_14260, PILA_14261, PILA_14666, PILA_15595, PILA_16463, PILA_17646, PILA_17647, PILA_17648, PILA_17651, PILA_18011, PILA_19938, PILA_20525, PILA_21625, PILA_21628, PILA_23200, PILA_24367, PILA_24382, PIL…	GAQR01021415.1.p1, GAQR01024321.1.p1, GAQR01024868.1.p1, GAQR01034837.1.p1, GAQR01034839.1.p1, GAQR01034842.1.p1, GAQR01034843.1.p1, GAQR01038479.1.p1, GAQR01038480.1.p1, GAQR01044164.1.p1, GAQR01044165.1.p1, GAQR01044167.1.p1, GAQR01044175.1.p1, GAQR01044282.1.p1, GAQR01048151.1.p1, GAQR01048153.1.p1, GAQR01048154.1.p1, GAQR01048160.1.p1, GAQR01055436.1.p1, GFHB01118537.1.p1, GFHB01188630.1.p1	GBQX01023543.1.p1, GBQX01043359.1.p1, GBQX01044134.1.p1, GBQX01046437.1.p1, GDQD01000800.1.p1, GDQD01006601.1.p1, GDQD01006603.1.p1, GDQD01009704.1.p1	GECO01004814.1.p1, GECO01016538.1.p1, GECO01017466.1.p1, GECO01022788.1.p1, GECO01022912.1.p1, GECO01028071.1.p1, GECO01030081.1.p1, GECO01033161.1.p1, GECO01034008.1.p1, GECO01035350.1.p1, GECO01039029.1.p1, GECO01042191.1.p1, GECO01048161.1.p1, GGAU01001386.1.p1, GGAU01019570.1.p1, GGAU01023720.1.p3, GGAU01037778.1.p1, GGAU01038846.1.p4, GGAU01039014.1.p1, GGAU01040544.1.p3, GGAU01041548.1.p1, …	GGJK01003792.1.p1, GGJK01007087.1.p1, GGJK01007088.1.p1, GGJK01009479.1.p1, GGJK01010526.1.p1, GGJK01012578.1.p1, GGJK01012947.1.p1, GGJK01013676.1.p1, GGJK01014729.1.p1, GGJK01015531.1.p1, GGJK01019564.1.p1, GGJK01020627.1.p1, GGJK01020851.1.p1, GGJK01021289.1.p1, GGJK01021722.1.p1, GGJK01022953.1.p1, GGJK01025389.1.p1, GGJK01028416.1.p1, GGJK01030681.1.p1, GGJK01033538.1.p1, GGJK01034547.1.p1, …	1A_I3_VO_L_2879_T_186_315_1 C_0.059_Length_1975 type=cds; aalen=544_82%_complete; clen=1975; strand=+; offs=60-1694; evgclass=main_okay_match_1A_I3_VO_L_2879_T_188_315 C_0.051_Length_1972_pct_98_98;, 1A_I3_VO_L_2879_T_273_315_1 C_0.055_Length_1806 type=cds; aalen=538_89%_complete; clen=1806; strand=+; offs=6-1622; evgclass=main_okay_match_1A_I3_VO_L_2879_T_266_315 C_0.055_Length_1797_pct_99_98;, …	GFZL01000105.1.p1, GFZL01006710.1.p1, GFZL01014427.1.p1, GFZL01014469.1.p1, GFZL01020255.1.p1, GFZL01020405.1.p1, GFZL01020598.1.p1, GFZL01021249.1.p1, GFZL01022924.1.p1, GFZL01023254.1.p1, GFZL01023255.1.p1, GFZL01023432.1.p1, GFZL01023433.1.p1, GFZL01023870.1.p1, GFZL01025605.1.p1, GFZL01025613.1.p1, GFZL01025898.1.p1, GFZL01026448.1.p1, GFZL01027275.1.p1, GFZL01027712.1.p1, GFZL01028582.1.p1	GAZW02000428.1.p1, GAZW02041136.1.p1, GAZW02041137.1.p1, GAZW02041139.1.p1, GAZW02041143.1.p1, GAZW02076021.1.p1, GAZW02076025.1.p1, GAZW02081211.1.p1, GAZW02081215.1.p1, GAZW02094631.1.p1, GFFY01010708.1.p1, GFFY01011935.1.p1, GFFY01012686.1.p1, GFFY01014750.1.p1, GFFY01015076.1.p1, GFFY01016424.1.p2, GFFY01027534.1.p1, GFFY01035729.1.p1, GFFY01039513.1.p1, GFFY01055538.1.p1, GFFY01066816.1.p1, …	Thoc_c11966_g1_i1.p1, Thoc_c14577_g1_i1.p1, Thoc_c15397_g1_i1.p2, Thoc_c28259_g4_i1.p1, Thoc_c28632_g1_i2.p1, Thoc_c28632_g1_i5.p1, Thoc_c29025_g3_i1.p1, Thoc_c49357_g1_i1.p1, Thoc_c52712_g1_i1.p1, Thoc_c52780_g1_i1.p1, Thoc_c55890_g1_i1.p1	SEGI_00246, SEGI_01621, SEGI_03070, SEGI_03171, SEGI_03599, SEGI_04085, SEGI_04626, SEGI_05424, SEGI_05509, SEGI_05629, SEGI_06319, SEGI_09058, SEGI_09464, SEGI_09898, SEGI_10581, SEGI_10692, SEGI_10892, SEGI_10991, SEGI_12111, SEGI_12136, SEGI_12474, SEGI_12951, SEGI_13061, SEGI_13062, SEGI_13464, SEGI_13568, SEGI_13796, SEGI_14548, SEGI_14930, SEGI_15294, SEGI_15582, SEGI_16221, SEGI_16443, SEG…	SESE_000343, SESE_011056, SESE_011470, SESE_024536, SESE_025539, SESE_025765, SESE_027042, SESE_027165, SESE_027288, SESE_027591, SESE_027861, SESE_028122, SESE_028827, SESE_028830, SESE_029315, SESE_029524, SESE_029546, SESE_029910, SESE_030067, SESE_030325, SESE_030992, SESE_031022, SESE_031127, SESE_031228, SESE_031388, SESE_031600, SESE_031971, SESE_032140, SESE_032627, SESE_032698, SESE_0329…
OG0000012	GGJG01026921.1.p1	evm_27.model.AmTr_v1.0_scaffold00003.455 pacid=31565414 transcript=evm_27.model.AmTr_v1.0_scaffold00003.455 locus=evm_27.TU.AmTr_v1.0_scaffold00003.455 ID=evm_27.model.AmTr_v1.0_scaffold00003.455.v1.0 annot-version=v1.0, evm_27.model.AmTr_v1.0_scaffold00139.8 pacid=31563522 transcript=evm_27.model.AmTr_v1.0_scaffold00139.8 locus=evm_27.TU.AmTr_v1.0_scaffold00139.8 ID=evm_27.model.AmTr_v1.0_scaffo…	GBYR01000908.1.p1, GBYR01021652.1.p1, GBYR01025678.1.p1, GBYR01037599.1.p1, GBYR01044792.1.p1, GBYR01045371.1.p1, GGBW01018960.1.p1, GGBW01021474.1.p1, GGBW01021843.1.p1, GGBW01025238.1.p1, GGBW01029309.1.p1, GGBW01037038.1.p1, GGBW01037665.1.p1, GGBW01048682.1.p1, GHLL01034045.1.p1, GHLL01051785.1.p1, GHLL01087253.1.p1, GHLL01105999.1.p1, GHLL01140978.1.p1, GHLL01144213.1.p1, GHLL01151900.1.p1, …		Megl_c16642_g1_i1.p1, Megl_c16902_g1_i1.p1, Megl_c28298_g1_i1.p1, Megl_c50644_g1_i1.p1, Megl_c775_g1_i2.p1	GCHX01045371.1.p1, GCHX01248070.1.p1, GCHX01346162.1.p1, GCHX01347581.1.p1, GCZO01001740.1.p1, GCZO01005068.1.p1, GCZO01009051.1.p1, GCZO01102569.1.p1, GCZO01103060.1.p1, GCZO01104684.1.p1, GCZO01106996.1.p1, GCZO01201060.1.p1, GCZO01204878.1.p2, gb|GFBZ01008492.1|.p1, gb|GFBZ01017375.1|.p1, gb|GFBZ01018584.1|.p1, gb|GFBZ01021594.1|.p2, gb|GFBZ01021955.1|.p1, gi|830855649|gb|GCZO01320494.1|.p1, g…	GGJJ01025945.1.p1, GGJJ01031282.1.p1, GGJJ01035998.1.p1, GGJJ01041079.1.p1, GGJJ01043293.1.p1, GGJJ01044767.1.p1, GGJJ01049951.1.p1, GGJJ01050589.1.p1, GGJJ01052884.1.p1	GFLL01000694.1.p1, GFLL01006543.1.p1, GFLL01013685.1.p1, GFLL01022438.1.p1, GFLL01041272.1.p1, GFLL01044539.1.p1, GFLL01048688.1.p1, GFLL01136447.1.p1, GFLL01138088.1.p2, GFLL01143088.1.p2, GFLL01152110.1.p1, GFLL01188747.1.p1	GGJH01006882.1.p1, GGJH01009767.1.p1, GGJH01032648.1.p1, GGJH01036437.1.p1	HAMI01000998.1.p1, HAMI01001642.1.p2, HAMI01013523.1.p1, HAMI01013870.1.p2, HAMI01023739.1.p1, HAMI01024335.1.p1, HAMI01034260.1.p1, HAMI01035264.1.p2	GBLJ01001540.1.p1, GBLJ01002803.1.p1, GBLJ01005098.1.p1, GBLJ01010198.1.p1, GBLJ01014001.1.p1, GBLJ01022847.1.p1, GBLJ01037518.1.p1, GBLJ01040457.1.p1, GBLJ01043619.1.p1, GBLJ01047303.1.p1, gb|GESU01013673.1|.p1, gb|GESU01022109.1|.p1, gb|GESU01025047.1|.p1, gb|GESU01031291.1|.p1, gb|GESU01034599.1|.p1, gb|GESU01038446.1|.p1, gb|GESU01040659.1|.p1	gb|GEUZ01004822.1|.p1, gb|GEUZ01020992.1|.p1, gb|GEUZ01022038.1|.p1, gb|GEUZ01022622.1|.p1, gb|GEUZ01023008.1|.p1, gb|GEUZ01023463.1|.p1, gb|GEUZ01026054.1|.p1, gb|GEUZ01027232.1|.p1, gb|GEUZ01027874.1|.p1, gb|GEUZ01028752.1|.p1, gb|GEUZ01029313.1|.p1, gb|GEUZ01029885.1|.p1, gb|GEUZ01030439.1|.p1, gb|GEUZ01030511.1|.p1	GFHB01033326.1.p1, GFHB01052098.1.p1, GFHB01054488.1.p1, GFHB01072623.1.p1, GFHB01162324.1.p1, GFHB01169129.1.p1, GFHB01187438.1.p1	GBQX01046378.1.p1, GBQX01053740.1.p1, GDQD01009572.1.p1	GECO01001651.1.p1, GECO01003272.1.p1, GECO01005080.1.p1, GECO01006706.1.p1, GECO01011810.1.p1, GECO01020031.1.p1, GECO01021922.1.p1, GECO01030709.1.p1, GGAU01004502.1.p1, GGAU01004547.1.p2, GGAU01014427.1.p5, GGAU01018537.1.p2, GGAU01022339.1.p2, GGAU01024005.1.p2, GGAU01025207.1.p1, GGAU01026770.1.p2, GGAU01028970.1.p3, GGAU01037582.1.p2, GGAU01050394.1.p4, GGAU01052723.1.p2	GGJK01030289.1.p1, GGJK01037262.1.p1	1A_I11_VO_L_1624_T_145_264_1 C_0.041_Length_951 type=cds; aalen=219_69%_complete; clen=951; strand=-; offs=870-211; evgclass=main_okay_match_3A_I19_VO_L_1_T_87971_241978 C_0.000_Length_1143_pct_98_100;, 1A_I11_VO_L_1_T_187240_226447_1 C_0.000_Length_909 type=cds; aalen=248_82%_complete; clen=909; strand=-; offs=906-160; evgclass=main_okay_match_1A_I11_VO_L_1_T_187237_226447 C_0.000_Length_548_pct…	GFZL01001086.1.p1, GFZL01009468.1.p1, GFZL01009652.1.p1, GFZL01011257.1.p1, GFZL01014248.1.p1, GFZL01016000.1.p1, GFZL01018948.1.p1, GFZL01019103.1.p1, GFZL01019559.1.p1, GFZL01022847.1.p1, GFZL01027854.1.p2	GAZW02025160.1.p1, GAZW02037147.1.p1, GAZW02047316.1.p1, GAZW02071829.1.p1, GAZW02091435.1.p1, GAZW02098818.1.p3, GAZW02098822.1.p1, GAZW02101429.1.p1, GAZW02104822.1.p1, GFFY01000876.1.p1, GFFY01000879.1.p1, GFFY01030664.1.p2, GFFY01045583.1.p1, GFFY01050060.1.p1, GFFY01053971.1.p1, GFFY01054764.1.p1, GFFY01059463.1.p1, GFFY01071793.1.p1, GFFY01075165.1.p1, GFFY01089627.1.p1, GFFY01094580.1.p1, …	Thoc_c17696_g2_i1.p1, Thoc_c27825_g1_i2.p1, Thoc_c29031_g1_i1.p1, Thoc_c29733_g1_i1.p1, Thoc_c49452_g1_i1.p1	SEGI_00872, SEGI_03862, SEGI_04566, SEGI_04674, SEGI_05344, SEGI_06375, SEGI_06620, SEGI_06867, SEGI_06946, SEGI_07422, SEGI_07720, SEGI_08063, SEGI_08882, SEGI_08984, SEGI_09391, SEGI_09859, SEGI_10156, SEGI_10647, SEGI_11706, SEGI_11843, SEGI_12413, SEGI_12462, SEGI_13459, SEGI_13593, SEGI_15568, SEGI_17693, SEGI_18102, SEGI_19024, SEGI_19996, SEGI_20068, SEGI_20560, SEGI_21099, SEGI_21588, SEG…	SESE_026771, SESE_028539, SESE_029617, SESE_030830, SESE_031366, SESE_033347, SESE_034226, SESE_035975, SESE_037066, SESE_044363, SESE_046080, SESE_047238, SESE_048571, SESE_051922, SESE_052007, SESE_052202, SESE_055093, SESE_055725, SESE_055771, SESE_056109, SESE_056257, SESE_056355, SESE_056666, SESE_056675, SESE_056793, SESE_057193, SESE_057836, SESE_058562, SESE_058607, SESE_058624, SESE_0587…
OG0000013	GGJG01002856.1.p1, GGJG01003975.1.p1, GGJG01006408.1.p1, GGJG01007632.1.p1, GGJG01009067.1.p1, GGJG01010271.1.p1, GGJG01011195.1.p1, GGJG01012528.1.p1, GGJG01013765.1.p1, GGJG01014063.1.p1, GGJG01014226.1.p1, GGJG01014746.1.p1, GGJG01017088.1.p1, GGJG01017132.1.p1, GGJG01020064.1.p1, GGJG01020191.1.p1, GGJG01021199.1.p1, GGJG01021211.1.p1, GGJG01023591.1.p1, GGJG01024319.1.p1, GGJG01024613.1.p1, …	evm_27.model.AmTr_v1.0_scaffold00088.113 pacid=31575318 transcript=evm_27.model.AmTr_v1.0_scaffold00088.113 locus=evm_27.TU.AmTr_v1.0_scaffold00088.113 ID=evm_27.model.AmTr_v1.0_scaffold00088.113.v1.0 annot-version=v1.0, evm_27.model.AmTr_v1.0_scaffold00226.1 pacid=31552175 transcript=evm_27.model.AmTr_v1.0_scaffold00226.1 locus=evm_27.TU.AmTr_v1.0_scaffold00226.1 ID=evm_27.model.AmTr_v1.0_scaffo…	GBYR01025636.1.p1, GBYR01025639.1.p1, GBYR01037400.1.p1, GBYR01037406.1.p1, GBYR01038422.1.p1, GGBW01014814.1.p1, GHLL01084082.1.p1, GHLL01251365.1.p1, GHLL01251369.1.p1, GHLL01264341.1.p1, Gb_36483	TnS000672683t01, TnS000672683t02, TnS000672683t06, TnS000883791t01	Megl_c21212_g2_i1.p1, Megl_c21212_g2_i2.p1, Megl_c21212_g4_i2.p1, Megl_c25496_g1_i1.p1, Megl_c25766_g1_i2.p1, Megl_c25957_g1_i1.p1, Megl_c25957_g2_i2.p1, Megl_c26227_g1_i3.p1, Megl_c26227_g3_i1.p1, Megl_c27864_g2_i2.p1, Megl_c27864_g3_i1.p1, Megl_c27864_g4_i1.p1, Megl_c28580_g1_i1.p1, Megl_c28580_g2_i9.p1, Megl_c28580_g4_i3.p1, Megl_c28599_g2_i1.p1, Megl_c28599_g3_i1.p1	GCHX01350128.1.p1, GCZO01207735.1.p1, GCZO01300672.1.p1, GCZO01307211.1.p1, gi|830829911|gb|GCZO01346228.1|.p1, gi|830851734|gb|GCZO01324408.1|.p1, gi|830886263|gb|GCZO01293910.1|.p1, gi|830896350|gb|GCZO01283824.1|.p1, gi|830913203|gb|GCZO01266971.1|.p1, gi|830938526|gb|GCZO01241648.1|.p1, gi|830941415|gb|GCZO01238760.1|.p1, gi|830962057|gb|GCZO01218119.1|.p1, gi|831001314|gb|GCZO01179103.1|.p1,…	GGJJ01004134.1.p1, GGJJ01006590.1.p1, GGJJ01007801.1.p1, GGJJ01009232.1.p1, GGJJ01014026.1.p1, GGJJ01014557.1.p1, GGJJ01015031.1.p1, GGJJ01015097.1.p1, GGJJ01016730.1.p1, GGJJ01017386.1.p1, GGJJ01021829.1.p1, GGJJ01023146.1.p1, GGJJ01023147.1.p1, GGJJ01023160.1.p1, GGJJ01025335.1.p1, GGJJ01026583.1.p1, GGJJ01036018.1.p1, GGJJ01040609.1.p1, GGJJ01055743.1.p1	GDQR01000297.1.p1, GDQR01003333.1.p1, GDQR01009088.1.p1, GDQR01012098.1.p1, GDQR01012160.1.p1, GDQR01014277.1.p1, GDQR01021008.1.p1, GFLL01059541.1.p1, GFLL01067737.1.p1, GFLL01069036.1.p1, GFLL01079846.1.p1, GFLL01079847.1.p1, GFLL01079848.1.p1, GFLL01084361.1.p1, GFLL01102610.1.p1, GFLL01123088.1.p1, GFLL01123091.1.p1, GFLL01123099.1.p1, GFLL01123100.1.p1, GFLL01148199.1.p1, gb|GFBO01015717.1|.…	GGJH01001558.1.p1, GGJH01005531.1.p1, GGJH01006159.1.p1, GGJH01006413.1.p1, GGJH01007276.1.p1, GGJH01008205.1.p1, GGJH01009128.1.p1, GGJH01009510.1.p1, GGJH01010437.1.p1, GGJH01012373.1.p1, GGJH01016540.1.p1, GGJH01019078.1.p1, GGJH01019952.1.p1, GGJH01020323.1.p2, GGJH01020459.1.p1, GGJH01021347.1.p1, GGJH01021829.1.p1, GGJH01022814.1.p1, GGJH01023146.1.p1, GGJH01023785.1.p1, GGJH01023786.1.p1, …	HAMI01001784.1.p1, HAMI01001824.1.p1, HAMI01002188.1.p1, HAMI01005036.1.p1, HAMI01007800.1.p1, HAMI01008637.1.p1, HAMI01010857.1.p1, HAMI01013652.1.p1, HAMI01017225.1.p1, HAMI01018104.1.p1, HAMI01024315.1.p1, HAMI01032531.1.p1, HAMI01033709.1.p1	GBLJ01002925.1.p1, GBLJ01003566.1.p1, GBLJ01006046.1.p1, GBLJ01008264.1.p1, GBLJ01010642.1.p1, GBLJ01011020.1.p1, GBLJ01018378.1.p1, GBLJ01020114.1.p1, GBLJ01020127.1.p1, GBLJ01024031.1.p1, GBLJ01033467.1.p1, GBLJ01036811.1.p1, gb|GESU01000184.1|.p1, gb|GESU01009010.1|.p1, gb|GESU01011966.1|.p1, gb|GESU01013408.1|.p1, gb|GESU01013918.1|.p1, gb|GESU01015588.1|.p1, gb|GESU01015661.1|.p1, gb|GESU010…	PILA_01782, PILA_02258, PILA_02798, PILA_04148, PILA_04993, PILA_07084, PILA_07085, PILA_08381, PILA_09960, PILA_10751, PILA_11000, PILA_11261, PILA_11275, PILA_13056, PILA_13361, PILA_14691, PILA_14994, PILA_14996, PILA_15809, PILA_18255, PILA_19706, PILA_22741, PILA_23410, PILA_30424, PILA_30429, PILA_32585, PILA_33061, gb|GEUZ01003805.1|.p1, gb|GEUZ01003833.1|.p1, gb|GEUZ01003838.1|.p1, gb|GEU…	GAQR01010056.1.p1, GAQR01017786.1.p1, GAQR01020857.1.p1, GAQR01030495.1.p1, GAQR01038939.1.p1, GAQR01040409.1.p1, GAQR01041570.1.p1, GAQR01042699.1.p1, GAQR01042702.1.p1, GAQR01042705.1.p1, GFHB01007794.1.p1, GFHB01009511.1.p1, GFHB01012036.1.p1, GFHB01060333.1.p1, GFHB01087946.1.p1, GFHB01095940.1.p1, GFHB01125923.1.p1, GFHB01126111.1.p1, GFHB01173049.1.p1, GFHB01179246.1.p1	GBQX01029439.1.p1, GBQX01035834.1.p1, GBQX01047420.1.p1, GBQX01049357.1.p1, GDQD01003363.1.p1, GDQD01008899.1.p1	GECO01004001.1.p1, GECO01004976.1.p1, GECO01010546.1.p1, GECO01012737.1.p1, GECO01013771.1.p1, GECO01014844.1.p1, GECO01017741.1.p1, GECO01018549.1.p1, GECO01018700.1.p1, GECO01021061.1.p1, GECO01026960.1.p1, GECO01034672.1.p1, GECO01034792.1.p1, GECO01035134.1.p1, GECO01035291.1.p1, GECO01035315.1.p1, GECO01036589.1.p1, GECO01037767.1.p2, GECO01037768.1.p1, GECO01038262.1.p1, GECO01038386.1.p1, …	GGJK01001444.1.p1, GGJK01002869.1.p1, GGJK01004994.1.p1, GGJK01006544.1.p1, GGJK01007820.1.p1, GGJK01008209.1.p1, GGJK01009802.1.p1, GGJK01009803.1.p1, GGJK01016424.1.p1, GGJK01016633.1.p1, GGJK01016959.1.p1, GGJK01017330.1.p1, GGJK01020715.1.p1, GGJK01021214.1.p1, GGJK01021983.1.p1, GGJK01023613.1.p1, GGJK01024238.1.p1, GGJK01024289.1.p1, GGJK01031799.1.p1, GGJK01031994.1.p1, GGJK01032002.1.p1, …	1A_I11_VO_L_1_T_58734_226447_1 C_0.000_Length_851 type=cds; aalen=239_84%_complete; clen=851; strand=+; offs=72-791; evgclass=main_okay_match_1A_I11_VO_L_1_T_58730_226447 C_0.000_Length_639_pct_99_73;, 1A_I3_VO_L_1_T_8565_136734_1 C_0.000_Length_1257 type=cds; aalen=205_49%_complete-utrpoor; clen=1257; strand=-; offs=882-265; evgclass=main_okay_match_1A_I3_VO_L_1_T_8671_136734 C_0.000_Length_1251…	GFZL01000905.1.p1, GFZL01012275.1.p1, GFZL01012701.1.p1, GFZL01012785.1.p1, GFZL01013112.1.p1, GFZL01014159.1.p1, GFZL01020122.1.p1, GFZL01020154.1.p1, GFZL01020169.1.p1, GFZL01020517.1.p1, GFZL01020632.1.p1, GFZL01021620.1.p1, GFZL01021928.1.p1, GFZL01023257.1.p1, GFZL01025496.1.p1, GFZL01025596.1.p1, GFZL01025691.1.p1, GFZL01026530.1.p1, GFZL01027206.1.p1, GFZL01027326.1.p1, GFZL01027853.1.p1, …	GAZW02036862.1.p1, GAZW02036867.1.p1, GAZW02059672.1.p1, GAZW02067041.1.p1, GAZW02070608.1.p1, GAZW02075871.1.p1, GAZW02075876.1.p1, GAZW02099999.1.p1, GAZW02100000.1.p1, GAZW02100007.1.p1, GFFY01001338.1.p1, GFFY01007255.1.p1, GFFY01009151.1.p1, GFFY01025720.1.p1, GFFY01028531.1.p1, GFFY01035309.1.p1, GFFY01036283.1.p1, GFFY01039997.1.p1, GFFY01043328.1.p1, GFFY01045793.1.p1, GFFY01049086.1.p1, …	Thoc_c20691_g1_i1.p1, Thoc_c21118_g1_i1.p1, Thoc_c28146_g1_i2.p1, Thoc_c28146_g2_i1.p1, Thoc_c28213_g1_i2.p1, Thoc_c28213_g1_i3.p1, Thoc_c28213_g1_i5.p1, Thoc_c28213_g3_i1.p1, Thoc_c28213_g8_i1.p1, Thoc_c28271_g2_i1.p1, Thoc_c28381_g1_i1.p1, Thoc_c28381_g2_i1.p1, Thoc_c28425_g1_i1.p1, Thoc_c28425_g2_i2.p1, Thoc_c28425_g3_i3.p1, Thoc_c28425_g3_i4.p1, Thoc_c28838_g1_i2.p1, Thoc_c7928_g1_i1.p1	SEGI_01095, SEGI_02757, SEGI_05536, SEGI_05870, SEGI_06852, SEGI_07414, SEGI_07447, SEGI_08766, SEGI_08774, SEGI_09942, SEGI_13315, SEGI_16107, SEGI_16233, SEGI_17686, SEGI_19951, SEGI_20099, SEGI_21148, SEGI_22398, SEGI_23801, SEGI_27511, SEGI_27768, SEGI_29855, SEGI_35196, SEGI_35292, SEGI_35772, SEGI_38167, SEGI_38916, SEGI_39989, SEGI_41501	SESE_000112, SESE_002312, SESE_008260, SESE_013933, SESE_025026, SESE_026051, SESE_026463, SESE_027946, SESE_028924, SESE_030009, SESE_032325, SESE_034321, SESE_037256, SESE_037303, SESE_038590, SESE_039527, SESE_040544, SESE_040632, SESE_040982, SESE_041634, SESE_042318, SESE_056319, SESE_057445, SESE_058234, SESE_058374, SESE_059024, SESE_059252, SESE_059404, SESE_060901, SESE_061524, SESE_0620…
OG0000014	GGJG01000722.1.p1, GGJG01001377.1.p1, GGJG01002244.1.p1, GGJG01003491.1.p1, GGJG01004145.1.p1, GGJG01007936.1.p1, GGJG01012186.1.p1, GGJG01019797.1.p1, GGJG01019798.1.p1, GGJG01019848.1.p1, GGJG01020619.1.p1, GGJG01023525.1.p1, GGJG01024107.1.p1, GGJG01028769.1.p1, GGJG01028888.1.p1, GGJG01030233.1.p1, GGJG01030767.1.p1, GGJG01033078.1.p1, GGJG01033169.1.p1, GGJG01035477.1.p1, GGJG01037280.1.p1, …	evm_27.model.AmTr_v1.0_scaffold00002.280 pacid=31562451 transcript=evm_27.model.AmTr_v1.0_scaffold00002.280 locus=evm_27.TU.AmTr_v1.0_scaffold00002.280 ID=evm_27.model.AmTr_v1.0_scaffold00002.280.v1.0 annot-version=v1.0, evm_27.model.AmTr_v1.0_scaffold00133.21 pacid=31565003 transcript=evm_27.model.AmTr_v1.0_scaffold00133.21 locus=evm_27.TU.AmTr_v1.0_scaffold00133.21 ID=evm_27.model.AmTr_v1.0_sca…	GBYR01023646.1.p1, GBYR01028488.1.p1, GBYR01035834.1.p1, GGBW01010294.1.p1, GGBW01011705.1.p1, GGBW01014108.1.p1, GGBW01042241.1.p1, GHLL01258857.1.p1, Gb_08340, Gb_20610, Gb_24016, Gb_39206	TnS000157837t01, TnS000312789t01, TnS000327247t07, TnS000471885t01, TnS000471885t02, TnS000471885t03	Megl_c15708_g1_i1.p1, Megl_c17409_g1_i1.p1, Megl_c21595_g1_i1.p1, Megl_c21595_g2_i1.p1, Megl_c24634_g1_i1.p1, Megl_c26112_g1_i2.p1, Megl_c27277_g1_i2.p1, Megl_c27277_g1_i2.p2, Megl_c27277_g3_i1.p1, Megl_c27326_g1_i1.p1, Megl_c27326_g1_i1.p2, Megl_c8895_g1_i1.p1	GCHX01047976.1.p1, GCHX01247010.1.p1, GCHX01253195.1.p1, GCHX01347639.1.p1, GCHX01351823.1.p1, GCHX01352802.1.p1, GCZO01101202.1.p1, GCZO01209907.1.p1, GCZO01300270.1.p1, GCZO01306803.1.p1, gb|GFBZ01004312.1|.p1, gb|GFBZ01005616.1|.p1, gb|GFBZ01008903.1|.p1, gb|GFBZ01013950.1|.p1, gb|GFBZ01014296.1|.p1, gb|GFBZ01015433.1|.p1, gi|830828293|gb|GCZO01347844.1|.p1, gi|830857048|gb|GCZO01319095.1|.p1,…	GGJJ01000768.1.p1, GGJJ01001509.1.p1, GGJJ01002314.1.p1, GGJJ01003622.1.p1, GGJJ01004322.1.p1, GGJJ01008112.1.p1, GGJJ01012156.1.p1, GGJJ01021364.1.p1, GGJJ01021846.1.p1, GGJJ01022345.1.p1, GGJJ01023642.1.p1, GGJJ01028454.1.p1, GGJJ01034664.1.p1, GGJJ01044225.1.p1, GGJJ01044916.1.p1, GGJJ01053552.1.p1	GDQR01001091.1.p1, GDQR01005971.1.p1, GDQR01008065.1.p1, GDQR01008157.1.p1, GDQR01008879.1.p1, GDQR01010343.1.p1, GDQR01012091.1.p1, GDQR01013215.1.p1, GDQR01015125.1.p1, GDQR01019749.1.p1, GFLL01030304.1.p2, GFLL01054795.1.p1, GFLL01066580.1.p1, GFLL01068336.1.p1, GFLL01093151.1.p2, GFLL01093155.1.p1, GFLL01093366.1.p1, GFLL01102983.1.p1, GFLL01113315.1.p1, GFLL01113321.1.p1, GFLL01123616.1.p1, …	GGJH01004043.1.p1, GGJH01004110.1.p1, GGJH01004740.1.p1, GGJH01004997.1.p1, GGJH01007265.1.p1, GGJH01010928.1.p1, GGJH01012668.1.p1, GGJH01012975.1.p1, GGJH01013452.1.p1, GGJH01015069.1.p1, GGJH01025291.1.p1, GGJH01027150.1.p1, GGJH01030951.1.p1, GGJH01031098.1.p1, GGJH01035079.1.p1, GGJH01036268.1.p1, GGJH01037120.1.p1, GGJH01037294.1.p1, GGJH01038854.1.p1, GGJH01042283.1.p1, GGJH01046536.1.p1	HAMI01000518.1.p1, HAMI01001427.1.p1, HAMI01001946.1.p1, HAMI01002085.1.p1, HAMI01002560.1.p1, HAMI01002683.1.p1, HAMI01004281.1.p1, HAMI01005498.1.p1, HAMI01006098.1.p1, HAMI01008520.1.p1, HAMI01015810.1.p1, HAMI01020599.1.p1, HAMI01022984.1.p1, HAMI01024399.1.p1, HAMI01025952.1.p1, HAMI01026847.1.p1, HAMI01027501.1.p1, HAMI01030620.1.p1, HAMI01031332.1.p1, HAMI01031947.1.p1, HAMI01033724.1.p1	GBLJ01006197.1.p1, GBLJ01008165.1.p1, GBLJ01021271.1.p1, GBLJ01029259.1.p1, GBLJ01030872.1.p1, GBLJ01036496.1.p1, GBLJ01036955.1.p1, GBLJ01039602.1.p1, GBLJ01045070.1.p1, gb|GESU01003896.1|.p1, gb|GESU01018206.1|.p2	PILA_01050, PILA_01051, PILA_04593, PILA_05364, PILA_06870, PILA_07666, PILA_09357, PILA_09729, PILA_10316, PILA_10317, PILA_11608, PILA_16161, PILA_16822, PILA_17362, PILA_17507, PILA_24752, PILA_25686, PILA_26372, PILA_27251, PILA_27255, PILA_27256, PILA_27429, PILA_28354, PILA_28970, PILA_29446, PILA_29860, PILA_30051, PILA_31705, PILA_33113, PILA_33285, PILA_33627, PILA_34619, PILA_34620, PIL…	GAQR01007618.1.p4, GAQR01008425.1.p2, GAQR01015867.1.p1, GAQR01025156.1.p1, GAQR01029447.1.p1, GAQR01030937.1.p1, GAQR01031896.1.p1, GAQR01031897.1.p1, GAQR01031899.1.p1, GAQR01034000.1.p1, GAQR01044124.1.p1, GAQR01044125.1.p1, GAQR01045036.1.p1, GAQR01046503.1.p1, GAQR01046604.1.p1, GAQR01046614.1.p1, GAQR01046622.1.p1, GAQR01049023.1.p1, GAQR01052383.1.p1, GAQR01054112.1.p1, GFHB01009314.1.p1, …	GBQX01014086.1.p1, GBQX01026604.1.p1, GBQX01027379.1.p1, GBQX01032816.1.p1, GBQX01038097.1.p1, GBQX01041658.1.p1, GBQX01046651.1.p1, GBQX01050232.1.p1, GBQX01053179.1.p1, GDQD01005874.1.p1, GDQD01006752.1.p1, GDQD01007585.1.p1, GDQD01007586.1.p1, GDQD01007974.1.p1	GECO01005258.1.p1, GECO01010002.1.p1, GECO01010038.1.p1, GECO01012860.1.p1, GECO01013016.1.p1, GECO01013728.1.p1, GECO01016267.1.p1, GECO01017596.1.p1, GECO01017931.1.p1, GECO01018576.1.p1, GECO01021258.1.p1, GECO01022210.1.p1, GECO01024194.1.p1, GECO01025308.1.p1, GECO01028024.1.p1, GECO01028700.1.p1, GECO01033189.1.p1, GECO01034264.1.p1, GECO01034602.1.p1, GECO01038599.1.p1, GECO01038802.1.p1, …	GGJK01003656.1.p1, GGJK01004276.1.p1, GGJK01004493.1.p1, GGJK01004723.1.p1, GGJK01006577.1.p1, GGJK01011326.1.p1, GGJK01011619.1.p1, GGJK01015707.1.p1, GGJK01015809.1.p1, GGJK01018332.1.p1, GGJK01019610.1.p1, GGJK01024145.1.p1, GGJK01024906.1.p1, GGJK01028748.1.p1, GGJK01028909.1.p1, GGJK01030643.1.p1, GGJK01031228.1.p1, GGJK01032935.1.p1, GGJK01034509.1.p1, GGJK01035678.1.p1	1A_I3_VO_L_4551_T_143_171_1 C_0.071_Length_2150 type=cds; aalen=618_86%_complete; clen=2150; strand=-; offs=2145-289; evgclass=main_okay_match_1A_I3_VO_L_4551_T_141_171 C_0.078_Length_2189_pct_98_96;, 1A_I5_VO_L_1720_T_44_86_1 C_0.063_Length_1879 type=cds; aalen=370_59%_complete-utrpoor; clen=1879; strand=-; offs=1262-150; evgclass=main_okay_match_1A_I5_VO_L_1720_T_41_86 C_0.045_Length_1474_pct_9…	GFZL01000333.1.p1, GFZL01000600.1.p1, GFZL01000744.1.p1, GFZL01005438.1.p1, GFZL01006879.1.p1, GFZL01014555.1.p1, GFZL01014659.1.p1, GFZL01014763.1.p1, GFZL01016596.1.p1, GFZL01016901.1.p1, GFZL01016947.1.p1, GFZL01019709.1.p1, GFZL01019717.1.p1, GFZL01019944.1.p1, GFZL01020004.1.p1, GFZL01020082.1.p1, GFZL01020846.1.p1, GFZL01020922.1.p1, GFZL01020971.1.p1, GFZL01021036.1.p1, GFZL01021351.1.p1, …	GAZW02005643.1.p1, GAZW02006722.1.p1, GAZW02041524.1.p1, GAZW02058245.1.p1, GAZW02058248.1.p1, GAZW02058249.1.p1, GAZW02063070.1.p1, GAZW02063076.1.p1, GAZW02063084.1.p1, GAZW02068996.1.p1, GAZW02069003.1.p1, GAZW02069004.1.p1, GAZW02077192.1.p1, GAZW02077195.1.p1, GAZW02077199.1.p1, GAZW02077200.1.p1, GAZW02083118.1.p1, GAZW02085488.1.p1, GAZW02089643.1.p1, GAZW02089645.1.p1, GAZW02091627.1.p1, …	Thoc_c16319_g1_i1.p1, Thoc_c21773_g1_i1.p1, Thoc_c27935_g4_i1.p1, Thoc_c28037_g1_i1.p2, Thoc_c28037_g2_i1.p1, Thoc_c28037_g2_i2.p1	SEGI_00007, SEGI_02494, SEGI_07729, SEGI_07820, SEGI_09209, SEGI_11217, SEGI_11839, SEGI_14517, SEGI_20984, SEGI_21635, SEGI_22668, SEGI_27139, SEGI_29445, SEGI_31121, SEGI_32585, SEGI_33487, SEGI_33634, SEGI_37476, SEGI_38127	SESE_009366, SESE_018710, SESE_020965, SESE_026515, SESE_026659, SESE_027277, SESE_028234, SESE_028299, SESE_029010, SESE_029133, SESE_029266, SESE_029329, SESE_029503, SESE_029934, SESE_030296, SESE_030336, SESE_030869, SESE_031007, SESE_031052, SESE_031340, SESE_031606, SESE_032058, SESE_032327, SESE_032697, SESE_032989, SESE_034329, SESE_034643, SESE_034964, SESE_035583, SESE_036116, SESE_0365…
OG0000015	GGJG01001967.1.p1, GGJG01002003.1.p1, GGJG01002052.1.p1, GGJG01002954.1.p1, GGJG01005013.1.p1, GGJG01006764.1.p1, GGJG01010034.1.p1, GGJG01011923.1.p1, GGJG01013869.1.p1, GGJG01016890.1.p1, GGJG01017436.1.p1, GGJG01018729.1.p1, GGJG01021563.1.p1, GGJG01024876.1.p1, GGJG01028685.1.p1, GGJG01029861.1.p1, GGJG01033628.1.p1, GGJG01037308.1.p1, GGJG01039322.1.p1, GGJG01042974.1.p1	evm_27.model.AmTr_v1.0_scaffold00010.51 pacid=31572815 transcript=evm_27.model.AmTr_v1.0_scaffold00010.51 locus=evm_27.TU.AmTr_v1.0_scaffold00010.51 ID=evm_27.model.AmTr_v1.0_scaffold00010.51.v1.0 annot-version=v1.0, evm_27.model.AmTr_v1.0_scaffold00035.13 pacid=31571326 transcript=evm_27.model.AmTr_v1.0_scaffold00035.13 locus=evm_27.TU.AmTr_v1.0_scaffold00035.13 ID=evm_27.model.AmTr_v1.0_scaffol…	GBYR01024339.1.p1, GBYR01035642.1.p1, GBYR01039037.1.p1, GGBW01004360.1.p1, GGBW01004361.1.p1, GGBW01004364.1.p1, GGBW01004385.1.p1, GGBW01004394.1.p2, GGBW01004398.1.p1, GGBW01004403.1.p1, GGBW01051053.1.p2, Gb_02274, Gb_13105, Gb_16373, Gb_17902, Gb_17904, Gb_17910, Gb_24738, Gb_31433, Gb_32547, Gb_35038, Gb_35039, Gb_35263	TnS000041425t03, TnS000137645t01, TnS000235315t03, TnS000246053t07, TnS000341719t01, TnS000362399t01, TnS000428321t01, TnS000549981t07, TnS000717947t01	Megl_c17197_g2_i1.p1, Megl_c22659_g1_i1.p1, Megl_c25629_g1_i1.p1, Megl_c25629_g1_i4.p1, Megl_c28288_g1_i5.p1, Megl_c28288_g3_i1.p1, Megl_c28288_g3_i2.p1, Megl_c28288_g5_i1.p1, Megl_c28471_g2_i10.p1	GCHX01249738.1.p1, GCHX01254841.1.p1, GCHX01448228.1.p1, GCZO01001624.1.p1, GCZO01001646.1.p1, GCZO01207510.1.p1, GCZO01303443.1.p1, GCZO01308799.1.p2, gi|830827970|gb|GCZO01348167.1|.p1, gi|830838188|gb|GCZO01337951.1|.p1, gi|830838662|gb|GCZO01337477.1|.p1, gi|830839241|gb|GCZO01336898.1|.p2, gi|830850173|gb|GCZO01325969.1|.p1, gi|830864462|gb|GCZO01311682.1|.p1, gi|830883166|gb|GCZO01297006.1|…	GGJJ01001962.1.p1, GGJJ01003054.1.p1, GGJJ01005212.1.p1, GGJJ01006919.1.p1, GGJJ01010201.1.p1, GGJJ01012161.1.p1, GGJJ01014119.1.p1, GGJJ01016488.1.p1, GGJJ01019804.1.p1, GGJJ01021886.1.p1, GGJJ01026988.1.p1, GGJJ01029359.1.p1, GGJJ01030565.1.p1, GGJJ01032668.1.p1, GGJJ01033708.1.p1, GGJJ01035853.1.p1, GGJJ01048541.1.p1, GGJJ01051198.1.p1	GDQR01001314.1.p1, GDQR01003536.1.p1, GDQR01006500.1.p1, GDQR01008215.1.p1, GDQR01012495.1.p1, GFLL01051137.1.p1, GFLL01086109.1.p1, GFLL01086117.1.p1, GFLL01088763.1.p1, GFLL01088769.1.p2, GFLL01091522.1.p1, GFLL01097279.1.p1, GFLL01116035.1.p1, GFLL01135236.1.p1, GFLL01140222.1.p1, gb|GFBO01035853.1|.p1, gb|GFBO01065175.1|.p1, gb|GFBO01066446.1|.p1, gb|GFBO01076649.1|.p1, gb|GFBO01076664.1|.p1,…	GGJH01002627.1.p1, GGJH01004162.1.p1, GGJH01006208.1.p1, GGJH01009892.1.p1, GGJH01010657.1.p1, GGJH01018288.1.p1, GGJH01018896.1.p1, GGJH01020120.1.p1, GGJH01020748.1.p1, GGJH01021126.1.p1, GGJH01021900.1.p1, GGJH01029932.1.p1, GGJH01031094.1.p1, GGJH01031168.1.p1, GGJH01033674.1.p1, GGJH01037805.1.p1, GGJH01045396.1.p1, GGJH01046994.1.p1, GGJH01047420.1.p1	HAMI01002441.1.p1, HAMI01002969.1.p1, HAMI01008679.1.p1, HAMI01009505.1.p1, HAMI01013151.1.p1, HAMI01016657.1.p1, HAMI01017490.1.p1, HAMI01022179.1.p1, HAMI01023962.1.p1, HAMI01023970.1.p1, HAMI01035116.1.p1	GBLJ01001691.1.p1, GBLJ01002552.1.p1, GBLJ01003369.1.p1, GBLJ01009523.1.p1, GBLJ01009930.1.p1, GBLJ01012556.1.p1, GBLJ01015042.1.p1, GBLJ01030640.1.p1, gb|GESU01000214.1|.p1, gb|GESU01007982.1|.p1, gb|GESU01020285.1|.p1, gb|GESU01021004.1|.p1	PILA_00058, PILA_01992, PILA_02386, PILA_02451, PILA_02701, PILA_02702, PILA_05247, PILA_05354, PILA_07761, PILA_07764, PILA_09129, PILA_09364, PILA_09509, PILA_12545, PILA_12580, PILA_15578, PILA_17701, PILA_23094, PILA_23109, PILA_23297, PILA_23530, PILA_23532, PILA_25548, PILA_25747, PILA_28482, PILA_30737, PILA_32544, PILA_34049, PILA_34488, gb|GEUZ01002936.1|.p1, gb|GEUZ01002964.1|.p1, gb|GE…	GAQR01024434.1.p1, GAQR01024608.1.p1, GAQR01028356.1.p1, GAQR01032914.1.p1, GAQR01032915.1.p1, GAQR01040292.1.p1, GAQR01040293.1.p1, GAQR01040308.1.p1, GAQR01040410.1.p1, GAQR01044241.1.p1, GFHB01001328.1.p1, GFHB01005515.1.p1, GFHB01037564.1.p1, GFHB01078051.1.p1, GFHB01121077.1.p1	GBQX01032987.1.p1, GBQX01035150.1.p1, GBQX01036978.1.p1, GBQX01044046.1.p1, GBQX01047474.1.p1, GBQX01048816.1.p1, GBQX01050359.1.p1, GDQD01001369.1.p1	GECO01004968.1.p1, GECO01005163.1.p1, GECO01010081.1.p1, GECO01014375.1.p1, GECO01014557.1.p1, GECO01016100.1.p1, GECO01016565.1.p1, GECO01017761.1.p1, GECO01026635.1.p1, GECO01028919.1.p1, GECO01029312.1.p1, GECO01031002.1.p1, GECO01032282.1.p1, GECO01034504.1.p1, GECO01035497.1.p1, GECO01035675.1.p1, GECO01036004.1.p1, GECO01036069.1.p1, GECO01036333.1.p1, GECO01036743.1.p1, GECO01040226.1.p1, …	GGJK01002377.1.p1, GGJK01003813.1.p1, GGJK01008888.1.p1, GGJK01013798.1.p1, GGJK01016297.1.p1, GGJK01017456.1.p1, GGJK01030951.1.p1, GGJK01031253.1.p1, GGJK01032512.1.p1, GGJK01034371.1.p1, GGJK01034436.1.p1, GGJK01035076.1.p1, GGJK01037507.1.p1, GGJK01043884.1.p1, GGJK01044575.1.p1	1A_I3_VO_L_4065_T_57_67_1 C_0.308_Length_1353 type=cds; aalen=388_86%_complete; clen=1353; strand=-; offs=1182-16; evgclass=main_okay_match_1A_I3_VO_L_4065_T_24_67 C_0.215_Length_674_pct_98_74;, 1A_I8_VO_L_3_T_47055_67407_1 C_0.000_Length_3054 type=cds; aalen=703_69%_complete; clen=3054; strand=-; offs=2720-609; evgclass=main_okay_match_1A_I8_VO_L_3_T_47067_67407 C_0.000_Length_2941_pct_98_100;, …	GFZL01009313.1.p1, GFZL01014297.1.p1, GFZL01019056.1.p1, GFZL01020346.1.p1, GFZL01020457.1.p1, GFZL01020676.1.p1, GFZL01020696.1.p1, GFZL01020885.1.p1, GFZL01021034.1.p1, GFZL01021052.1.p1, GFZL01021708.1.p1, GFZL01021734.1.p1, GFZL01022415.1.p1, GFZL01022711.1.p1, GFZL01022916.1.p1, GFZL01025140.1.p1, GFZL01025491.1.p1, GFZL01025568.1.p1, GFZL01025723.1.p1, GFZL01025744.1.p1, GFZL01027350.1.p1, …	GAZW02044988.1.p1, GAZW02044990.1.p1, GFFY01004387.1.p1, GFFY01004845.1.p1, GFFY01005269.1.p1, GFFY01006845.1.p1, GFFY01007073.1.p1, GFFY01008485.1.p2, GFFY01009492.1.p1, GFFY01011035.1.p1, GFFY01012640.1.p1, GFFY01018301.1.p1, GFFY01022903.1.p1, GFFY01028590.1.p1, GFFY01062250.1.p1, GFFY01084116.1.p1, PSME_05998, PSME_07600, PSME_10212, PSME_11826, PSME_12294, PSME_14393, PSME_14682, PSME_14732,…	Thoc_c23124_g1_i2.p1, Thoc_c25392_g1_i2.p1, Thoc_c27333_g1_i2.p1, Thoc_c27591_g1_i1.p1, Thoc_c27591_g2_i1.p1, Thoc_c28220_g1_i2.p1, Thoc_c29083_g2_i5.p1, Thoc_c58667_g1_i1.p1	SEGI_00781, SEGI_01584, SEGI_03650, SEGI_04228, SEGI_04494, SEGI_04825, SEGI_04995, SEGI_05054, SEGI_05914, SEGI_05989, SEGI_07833, SEGI_08792, SEGI_08922, SEGI_08928, SEGI_09047, SEGI_11720, SEGI_12542, SEGI_12952, SEGI_13155, SEGI_13509, SEGI_13631, SEGI_13795, SEGI_16002, SEGI_18360, SEGI_18674, SEGI_20108, SEGI_20531, SEGI_21116, SEGI_21171, SEGI_22366, SEGI_24267, SEGI_25560, SEGI_25635, SEG…	SESE_004559, SESE_018869, SESE_020644, SESE_026348, SESE_026450, SESE_026965, SESE_032158, SESE_035016, SESE_057447, SESE_057984, SESE_058034, SESE_058183, SESE_059308, SESE_061828, SESE_062268, SESE_063289, SESE_063633, SESE_063776, SESE_064122, SESE_066648, SESE_066931, SESE_067616, SESE_067767, SESE_071503, SESE_071517, SESE_072734, SESE_072776, SESE_073439, SESE_073655, SESE_075469, SESE_0756…
OG0000016	GGJG01002679.1.p1, GGJG01006954.1.p1, GGJG01008125.1.p1, GGJG01018801.1.p1, GGJG01020234.1.p1, GGJG01020667.1.p1, GGJG01020850.1.p1, GGJG01021533.1.p1, GGJG01024651.1.p1, GGJG01025283.1.p1, GGJG01027562.1.p1, GGJG01029421.1.p1, GGJG01029805.1.p1, GGJG01036693.1.p1	evm_27.model.AmTr_v1.0_scaffold00022.271 pacid=31552357 transcript=evm_27.model.AmTr_v1.0_scaffold00022.271 locus=evm_27.TU.AmTr_v1.0_scaffold00022.271 ID=evm_27.model.AmTr_v1.0_scaffold00022.271.v1.0 annot-version=v1.0	GBYR01038113.1.p1, GGBW01004989.1.p1, GGBW01050766.1.p1, GHLL01123437.1.p1, Gb_04975, Gb_11562, Gb_21736, Gb_21737, Gb_25351, Gb_34873	TnS000332527t13, TnS000752331t05, TnS001020069t01	Megl_c13483_g1_i1.p1, Megl_c25257_g2_i3.p1, Megl_c26195_g1_i1.p1, Megl_c26195_g2_i1.p1, Megl_c28154_g1_i2.p1, Megl_c28154_g2_i5.p1, Megl_c28154_g2_i6.p1, Megl_c28154_g3_i1.p1, Megl_c28434_g2_i1.p1	GCHX01048297.1.p1, GCHX01052006.1.p1, GCHX01148952.1.p1, GCHX01249150.1.p1, GCHX01348726.1.p1, GCHX01352220.1.p1, GCZO01005668.1.p1, GCZO01102898.1.p1, GCZO01106521.1.p1, GCZO01200260.1.p1, GCZO01302855.1.p1, GCZO01309163.1.p1, gb|GFBZ01022103.1|.p1, gb|GFBZ01023511.1|.p2, gi|830830235|gb|GCZO01345904.1|.p1, gi|830839090|gb|GCZO01337049.1|.p1, gi|830847870|gb|GCZO01328271.1|.p1, gi|830851269|gb|G…	GGJJ01001856.1.p1, GGJJ01002752.1.p1, GGJJ01004004.1.p1, GGJJ01007099.1.p1, GGJJ01012024.1.p1, GGJJ01012278.1.p1, GGJJ01012471.1.p1, GGJJ01021193.1.p1, GGJJ01021866.1.p1, GGJJ01022449.1.p1, GGJJ01025419.1.p1, GGJJ01025559.1.p1, GGJJ01027180.1.p1, GGJJ01028733.1.p1, GGJJ01030953.1.p1, GGJJ01034008.1.p1, GGJJ01047286.1.p1, GGJJ01048187.1.p1, GGJJ01050064.1.p1	GDQR01000147.1.p1, GDQR01007800.1.p1, GDQR01012276.1.p1, GDQR01012917.1.p1, GDQR01013530.1.p1, GDQR01014664.1.p1, GDQR01014980.1.p1, GDQR01023634.1.p1, GFLL01037216.1.p1, GFLL01041588.1.p1, GFLL01046811.1.p1, GFLL01047703.1.p1, GFLL01047751.1.p1, GFLL01054233.1.p1, GFLL01063612.1.p1, GFLL01071363.1.p1, GFLL01078541.1.p1, GFLL01079388.1.p1, GFLL01079391.1.p1, GFLL01079701.1.p1, GFLL01087451.1.p1, …	GGJH01001065.1.p1, GGJH01010292.1.p1, GGJH01010553.1.p1, GGJH01013167.1.p1, GGJH01017425.1.p1, GGJH01021724.1.p1, GGJH01023795.1.p1, GGJH01025167.1.p1, GGJH01027046.1.p1, GGJH01027389.1.p1, GGJH01027980.1.p1, GGJH01028858.1.p1, GGJH01037040.1.p1, GGJH01040375.1.p1, GGJH01040518.1.p1, GGJH01045969.1.p1	HAMI01001656.1.p1, HAMI01005941.1.p1, HAMI01009037.1.p1, HAMI01014205.1.p1, HAMI01015141.1.p1, HAMI01017032.1.p1, HAMI01021974.1.p1, HAMI01023976.1.p1, HAMI01030591.1.p1, HAMI01030764.1.p1, HAMI01030862.1.p1, HAMI01035633.1.p1	GBLJ01003080.1.p1, GBLJ01004394.1.p1, GBLJ01005482.1.p1, GBLJ01006104.1.p1, GBLJ01006992.1.p1, GBLJ01009030.1.p1, GBLJ01018894.1.p1, GBLJ01037497.1.p1, GBLJ01046091.1.p1, gb|GESU01004078.1|.p1, gb|GESU01018885.1|.p1, gb|GESU01022492.1|.p1, gb|GESU01022563.1|.p1, gb|GESU01024625.1|.p1, gb|GESU01036243.1|.p1, gb|GESU01038335.1|.p1	PILA_00278, PILA_00883, PILA_01904, PILA_05652, PILA_06304, PILA_08176, PILA_11191, PILA_16871, PILA_18204, PILA_18236, PILA_20027, PILA_23342, PILA_24197, PILA_24238, PILA_26139, PILA_26141, PILA_33935, PILA_34612, PILA_36711, PILA_37676, gb|GEUZ01001614.1|.p1, gb|GEUZ01001790.1|.p1, gb|GEUZ01001830.1|.p1, gb|GEUZ01002353.1|.p1, gb|GEUZ01002728.1|.p1, gb|GEUZ01003625.1|.p1, gb|GEUZ01004506.1|.p1…	GAQR01029750.1.p1, GAQR01029753.1.p1, GAQR01029768.1.p1, GAQR01036191.1.p1, GAQR01036581.1.p1, GAQR01038162.1.p1, GAQR01043947.1.p1, GAQR01045668.1.p1, GAQR01046428.1.p1, GAQR01046751.1.p1, GAQR01046756.1.p1, GAQR01052542.1.p1, GAQR01054312.1.p1, GAQR01055320.1.p1, GAQR01056491.1.p1, GFHB01001986.1.p1, GFHB01008167.1.p1, GFHB01018942.1.p1, GFHB01022346.1.p1, GFHB01026042.1.p1, GFHB01050707.1.p1, …	GBQX01022754.1.p1, GBQX01032403.1.p1, GBQX01032866.1.p1, GDQD01002137.1.p1, GDQD01004239.1.p1	GECO01008059.1.p1, GECO01008928.1.p1, GECO01011179.1.p1, GECO01013657.1.p1, GECO01013970.1.p1, GECO01015462.1.p1, GECO01016365.1.p1, GECO01017347.1.p1, GECO01018543.1.p1, GECO01022220.1.p1, GECO01024191.1.p1, GECO01027037.1.p1, GECO01027522.1.p1, GECO01028378.1.p1, GECO01028753.1.p1, GECO01028863.1.p1, GECO01029166.1.p1, GECO01030684.1.p1, GECO01031670.1.p1, GECO01033262.1.p1, GECO01033350.1.p1, …	GGJK01008290.1.p1, GGJK01015646.1.p1, GGJK01020724.1.p1, GGJK01026927.1.p1, GGJK01027152.1.p1, GGJK01028024.1.p1, GGJK01029384.1.p1, GGJK01031492.1.p1, GGJK01032233.1.p1, GGJK01035210.1.p1, GGJK01040849.1.p2, GGJK01040850.1.p1, GGJK01041748.1.p1	1A_I11_VO_L_1_T_135205_226447_1 C_0.000_Length_764 type=cds; aalen=213_84%_complete; clen=764; strand=-; offs=716-75; evgclass=main_okay_match_3A_all_NT_comp90324_c0_seq7_pct_98_99;, 1A_I9_VO_L_1_T_44700_116761_1 C_0.000_Length_3078 type=cds; aalen=934_91%_complete; clen=3078; strand=-; offs=2949-145; evgclass=main_okay_match_1A_I9_VO_L_1_T_44694_116761 C_0.000_Length_2972_pct_99_100;, 1A_I9_VO_L…	GFZL01001032.1.p1, GFZL01012046.1.p1, GFZL01012068.1.p1, GFZL01012111.1.p1, GFZL01012135.1.p1, GFZL01012271.1.p1, GFZL01012563.1.p1, GFZL01013294.1.p1, GFZL01013540.1.p1, GFZL01013691.1.p1, GFZL01016209.1.p1, GFZL01019126.1.p1, GFZL01019733.1.p1, GFZL01020086.1.p1, GFZL01020143.1.p1, GFZL01020233.1.p1, GFZL01020535.1.p1, GFZL01020614.1.p1, GFZL01021893.1.p1, GFZL01022864.1.p1, GFZL01023068.1.p1, …	GAZW02005524.1.p1, GAZW02008685.1.p1, GAZW02023246.1.p1, GAZW02046105.1.p1, GAZW02046112.1.p1, GAZW02049990.1.p1, GAZW02050077.1.p1, GAZW02078156.1.p1, GAZW02097251.1.p1, GAZW02097252.1.p1, GAZW02101179.1.p1, GFFY01004395.1.p1, GFFY01005529.1.p1, GFFY01005623.1.p1, GFFY01007427.1.p1, GFFY01007587.1.p1, GFFY01007855.1.p1, GFFY01008040.1.p1, GFFY01008650.1.p1, GFFY01008769.1.p1, GFFY01009169.1.p1, …	Thoc_c20991_g1_i1.p1, Thoc_c23287_g1_i1.p1, Thoc_c23830_g1_i1.p1, Thoc_c26664_g1_i3.p1, Thoc_c28349_g1_i1.p1, Thoc_c41227_g1_i1.p1	SEGI_00295, SEGI_00740, SEGI_01089, SEGI_01638, SEGI_04714, SEGI_05418, SEGI_05863, SEGI_06696, SEGI_09710, SEGI_14089, SEGI_16141, SEGI_17955, SEGI_22773, SEGI_28902, SEGI_31842, SEGI_33052, SEGI_38950, SEGI_40105, SEGI_40733, SEGI_41530	SESE_026691, SESE_027656, SESE_029950, SESE_030241, SESE_031191, SESE_031826, SESE_036207, SESE_039237, SESE_041230, SESE_041853, SESE_047676, SESE_052341, SESE_052680, SESE_057885, SESE_057904, SESE_060690, SESE_061700, SESE_063102, SESE_063786, SESE_063888, SESE_068066, SESE_068982, SESE_069493, SESE_069991, SESE_070717, SESE_071903, SESE_072611, SESE_072928, SESE_074379, SESE_076366, SESE_0765…
OG0000017	GGJG01008987.1.p1, GGJG01009554.1.p1, GGJG01011976.1.p1, GGJG01016379.1.p1, GGJG01020591.1.p1, GGJG01020987.1.p1, GGJG01025356.1.p1, GGJG01025366.1.p1, GGJG01026972.1.p1, GGJG01034385.1.p1, GGJG01045092.1.p1	evm_27.model.AmTr_v1.0_scaffold00010.396 pacid=31572653 transcript=evm_27.model.AmTr_v1.0_scaffold00010.396 locus=evm_27.TU.AmTr_v1.0_scaffold00010.396 ID=evm_27.model.AmTr_v1.0_scaffold00010.396.v1.0 annot-version=v1.0, evm_27.model.AmTr_v1.0_scaffold00010.400 pacid=31572893 transcript=evm_27.model.AmTr_v1.0_scaffold00010.400 locus=evm_27.TU.AmTr_v1.0_scaffold00010.400 ID=evm_27.model.AmTr_v1.0_…	GBYR01000093.1.p1, GBYR01012533.1.p3, GBYR01022197.1.p1, GBYR01036013.1.p1, GBYR01036015.1.p1, GBYR01047530.1.p1, GBYR01053025.1.p1, GGBW01000789.1.p1, GGBW01000790.1.p1, GGBW01000844.1.p1, GGBW01000845.1.p1, GGBW01029534.1.p1, GGBW01029535.1.p1, GGBW01029885.1.p1, GGBW01044187.1.p1, GGBW01044191.1.p1, GGBW01044246.1.p1, GGBW01046510.1.p1, GGBW01054020.1.p1, GHLL01042109.1.p1, GHLL01168940.1.p1, …	TnS000450223t01, TnS000533047t01, TnS000602915t01, TnS000865723t01, TnS000925519t03, TnS001042977t01	Megl_c18913_g1_i2.p1, Megl_c18913_g1_i3.p1, Megl_c26718_g1_i2.p1, Megl_c28361_g2_i5.p2, Megl_c2961_g1_i2.p1, Megl_c31221_g1_i1.p1	GCHX01052630.1.p1, GCHX01249885.1.p1, GCZO01005184.1.p1, GCZO01207041.1.p1, gi|830822793|gb|GCZO01353343.1|.p1, gi|830824853|gb|GCZO01351283.1|.p1, gi|830841584|gb|GCZO01334555.1|.p1, gi|830842405|gb|GCZO01333736.1|.p1, gi|830862354|gb|GCZO01313790.1|.p1, gi|830936595|gb|GCZO01243579.1|.p2, gi|830947732|gb|GCZO01232443.1|.p1, gi|830964669|gb|GCZO01215507.1|.p1, gi|830988177|gb|GCZO01192003.1|.p1,…	GGJJ01005394.1.p1, GGJJ01008569.1.p1, GGJJ01009723.1.p1, GGJJ01010732.1.p1, GGJJ01015002.1.p1, GGJJ01019264.1.p1, GGJJ01021454.1.p1, GGJJ01022306.1.p1, GGJJ01022879.1.p1, GGJJ01023176.1.p1, GGJJ01024159.1.p1, GGJJ01027869.1.p1, GGJJ01028259.1.p1, GGJJ01032058.1.p1, GGJJ01032431.1.p1, GGJJ01033171.1.p2, GGJJ01040005.1.p2, GGJJ01040376.1.p1, GGJJ01050457.1.p1	GDQR01003482.1.p1, GDQR01004401.1.p1, GDQR01011926.1.p1, GDQR01018631.1.p1, GFLL01056411.1.p1, GFLL01066392.1.p1, GFLL01066414.1.p1, GFLL01109078.1.p1, GFLL01109084.1.p1, GFLL01115189.1.p1, GFLL01115191.1.p1, GFLL01141307.1.p1, GFLL01151872.1.p1, gb|GFBO01042954.1|.p1, gb|GFBO01062620.1|.p1, gb|GFBO01062625.1|.p1, gb|GFBO01070980.1|.p1, gb|GFBO01072358.1|.p1, gb|GFBO01072362.1|.p1, gb|GFBO0108302…	GGJH01012907.1.p1, GGJH01016040.1.p1, GGJH01020837.1.p1, GGJH01022004.1.p1, GGJH01022478.1.p1, GGJH01022558.1.p1, GGJH01022634.1.p1, GGJH01024600.1.p1, GGJH01025935.1.p1, GGJH01026985.1.p1, GGJH01029216.1.p1, GGJH01029221.1.p1, GGJH01029814.1.p1, GGJH01029977.1.p1, GGJH01034531.1.p1, GGJH01038820.1.p2, GGJH01043031.1.p1	HAMI01004005.1.p2, HAMI01008239.1.p1, HAMI01008944.1.p1, HAMI01011616.1.p1, HAMI01012493.1.p1, HAMI01012941.1.p1, HAMI01016541.1.p1, HAMI01029547.1.p2, HAMI01029927.1.p1, HAMI01034232.1.p1	GBLJ01005378.1.p1, GBLJ01006427.1.p1, GBLJ01008812.1.p1, GBLJ01032050.1.p1, gb|GESU01012628.1|.p1, gb|GESU01013324.1|.p1, gb|GESU01018282.1|.p1, gb|GESU01032638.1|.p1, gb|GESU01044216.1|.p1	PILA_00220, PILA_01917, PILA_02474, PILA_03149, PILA_03272, PILA_03683, PILA_06223, PILA_06429, PILA_06880, PILA_06934, PILA_07473, PILA_08819, PILA_09728, PILA_10256, PILA_10535, PILA_11350, PILA_11798, PILA_12097, PILA_13547, PILA_13600, PILA_14569, PILA_14658, PILA_15624, PILA_16380, PILA_16704, PILA_17322, PILA_17806, PILA_19550, PILA_19768, PILA_20585, PILA_21168, PILA_22086, PILA_24349, PIL…	GAQR01014364.1.p1, GAQR01014535.1.p2, GAQR01024120.1.p1, GAQR01054811.1.p2, GFHB01000308.1.p1, GFHB01000729.1.p1, GFHB01002254.1.p1, GFHB01020626.1.p1, GFHB01028574.1.p1, GFHB01055279.1.p1, GFHB01056508.1.p1, GFHB01059660.1.p1, GFHB01069685.1.p1, GFHB01095808.1.p1, GFHB01119377.1.p1, GFHB01145507.1.p1, GFHB01170379.1.p1, GFHB01188862.1.p1	GBQX01019132.1.p1, GBQX01038356.1.p1, GBQX01040082.1.p1, GBQX01042547.1.p1, GBQX01047726.1.p1, GBQX01047854.1.p1, GBQX01051665.1.p1, GDQD01000306.1.p1	GECO01009534.1.p1, GECO01012611.1.p1, GECO01017105.1.p1, GECO01022196.1.p1, GECO01026467.1.p2, GECO01026706.1.p1, GECO01027383.1.p1, GECO01029931.1.p1, GECO01034588.1.p1, GECO01035196.1.p1, GECO01036169.1.p1, GECO01036554.1.p1, GECO01036850.1.p1, GECO01039303.1.p1, GECO01040045.1.p1, GECO01040646.1.p1, GECO01042125.1.p1, GECO01051144.1.p1, GGAU01014435.1.p1, GGAU01022267.1.p2, GGAU01038256.1.p3, …	GGJK01000898.1.p1, GGJK01011550.1.p1, GGJK01014242.1.p1, GGJK01019059.1.p1, GGJK01019159.1.p1, GGJK01019375.1.p1, GGJK01019617.1.p1, GGJK01020182.1.p1, GGJK01020963.1.p1, GGJK01021448.1.p2, GGJK01021729.1.p1, GGJK01021999.1.p1, GGJK01022949.1.p1, GGJK01024372.1.p1, GGJK01024948.1.p1, GGJK01025231.1.p1, GGJK01025690.1.p1, GGJK01032988.1.p1, GGJK01036257.1.p2, GGJK01041622.1.p2	1A_I11_VO_L_1_T_142507_226447_1 C_0.000_Length_2580 type=cds; aalen=248_28%_complete-utrbad; clen=2580; strand=+; offs=874-1620; evgclass=main_okay_match_1A_I11_VO_L_1_T_142483_226447 C_0.000_Length_1647_pct_100_98;, 1A_I11_VO_L_1_T_186038_226447_1 C_0.000_Length_2555 type=cds; aalen=252_29%_complete-utrbad; clen=2555; strand=-; offs=1682-924; evgclass=main_okay_match_1A_I11_VO_L_1_T_94918_226447…	GFZL01000926.1.p1, GFZL01013012.1.p1, GFZL01013813.1.p1, GFZL01015621.1.p1, GFZL01019157.1.p1, GFZL01020028.1.p1, GFZL01020193.1.p1, GFZL01020199.1.p1, GFZL01020624.1.p1, GFZL01020871.1.p1, GFZL01021191.1.p1, GFZL01021255.1.p1, GFZL01021373.1.p1, GFZL01021871.1.p1, GFZL01024760.1.p1, GFZL01024805.1.p1, GFZL01024874.1.p1, GFZL01024912.1.p1, GFZL01025104.1.p1, GFZL01025227.1.p1, GFZL01025372.1.p1, …	GAZW02045022.1.p1, GAZW02048268.1.p2, GAZW02059791.1.p1, GAZW02078835.1.p2, GAZW02094353.1.p1, GAZW02094357.1.p1, GAZW02094358.1.p1, GFFY01000255.1.p1, GFFY01003295.1.p1, GFFY01006996.1.p1, GFFY01008093.1.p1, GFFY01008944.1.p1, GFFY01009991.1.p1, GFFY01010360.1.p1, GFFY01015256.1.p1, GFFY01034458.1.p1, GFFY01043441.1.p1, GFFY01044171.1.p1, GFFY01045481.1.p1, GFFY01049175.1.p1, GFFY01053862.1.p1, …	Thoc_c25123_g2_i1.p1, Thoc_c27616_g1_i3.p1, Thoc_c28106_g4_i1.p2, Thoc_c28294_g1_i4.p2, Thoc_c28294_g1_i5.p2, Thoc_c28440_g3_i2.p1, Thoc_c28638_g1_i4.p2, Thoc_c29075_g2_i3.p1, Thoc_c29075_g3_i1.p1, Thoc_c29075_g5_i1.p1, Thoc_c35710_g1_i1.p1, Thoc_c47260_g1_i1.p1	SEGI_00753, SEGI_01039, SEGI_01664, SEGI_03401, SEGI_06422, SEGI_06881, SEGI_07895, SEGI_07973, SEGI_10256, SEGI_13002, SEGI_13013, SEGI_13953, SEGI_14601, SEGI_14999, SEGI_15640, SEGI_16343, SEGI_19050, SEGI_19981, SEGI_21364, SEGI_21429, SEGI_22022, SEGI_22056, SEGI_22743, SEGI_23150, SEGI_25192, SEGI_25794, SEGI_31660, SEGI_31977, SEGI_32045, SEGI_32596, SEGI_32814, SEGI_33035, SEGI_33244, SEG…	SESE_009427, SESE_026347, SESE_026802, SESE_026976, SESE_027282, SESE_027497, SESE_028023, SESE_028497, SESE_029882, SESE_030371, SESE_035392, SESE_036911, SESE_038526, SESE_039213, SESE_040521, SESE_041355, SESE_057517, SESE_058491, SESE_059538, SESE_059660, SESE_060053, SESE_061219, SESE_061338, SESE_064411, SESE_064812, SESE_065621, SESE_066877, SESE_066941, SESE_067680, SESE_068076, SESE_0695…
OG0000018	GGJG01011612.1.p1, GGJG01014566.1.p1, GGJG01021415.1.p2, GGJG01026619.1.p1, GGJG01027031.1.p1, GGJG01030245.1.p1, GGJG01031848.1.p1, GGJG01033930.1.p1, GGJG01037324.1.p1, GGJG01039530.1.p1, GGJG01043782.1.p2	evm_27.model.AmTr_v1.0_scaffold00055.4 pacid=31571683 transcript=evm_27.model.AmTr_v1.0_scaffold00055.4 locus=evm_27.TU.AmTr_v1.0_scaffold00055.4 ID=evm_27.model.AmTr_v1.0_scaffold00055.4.v1.0 annot-version=v1.0	GBYR01016429.1.p1, GBYR01030187.1.p1, GBYR01032463.1.p1, GBYR01037870.1.p1, GBYR01039858.1.p1, GGBW01004104.1.p1, GGBW01027588.1.p3, GGBW01039111.1.p1, GGBW01039677.1.p1, GGBW01042440.1.p1, GGBW01046392.1.p1, GGBW01051024.1.p1, GGBW01075718.1.p1, GHLL01118177.1.p2, GHLL01123530.1.p1, GHLL01144523.1.p1, GHLL01153956.1.p1, GHLL01177551.1.p1, GHLL01196930.1.p1, GHLL01214833.1.p1, GHLL01217028.1.p1, …	TnS000402349t06	Megl_c14413_g3_i1.p1, Megl_c14969_g1_i1.p1, Megl_c28498_g2_i4.p1, Megl_c28602_g2_i1.p1	GCHX01046186.1.p1, GCHX01047048.1.p1, GCHX01048105.1.p1, GCHX01050429.1.p1, GCHX01145879.1.p1, GCHX01152759.1.p2, GCHX01153998.1.p2, GCHX01154982.1.p1, GCHX01247313.1.p1, GCHX01248894.1.p1, GCHX01251321.1.p1, GCZO01002711.1.p1, GCZO01002853.1.p1, GCZO01003285.1.p1, GCZO01003345.1.p1, GCZO01006756.1.p1, GCZO01107783.1.p1, GCZO01108260.1.p1, GCZO01109284.1.p1, GCZO01201509.1.p1, GCZO01206660.1.p1, …	GGJJ01002693.1.p1, GGJJ01011692.1.p1, GGJJ01018719.1.p1, GGJJ01024770.1.p1, GGJJ01027164.1.p1, GGJJ01030354.1.p1, GGJJ01031129.1.p1, GGJJ01031187.1.p1, GGJJ01032971.1.p1, GGJJ01035740.1.p1, GGJJ01041963.1.p1, GGJJ01045288.1.p1, GGJJ01047477.1.p1, GGJJ01051773.1.p1, GGJJ01056964.1.p1	GDQR01016983.1.p1, GDQR01019676.1.p1, GFLL01017046.1.p1, GFLL01026338.1.p2, GFLL01036598.1.p1, GFLL01037071.1.p1, GFLL01045769.1.p2, GFLL01066461.1.p2, GFLL01069054.1.p1, GFLL01101909.1.p1, GFLL01104340.1.p1, GFLL01124423.1.p1, GFLL01124947.1.p1, GFLL01134620.1.p1, GFLL01136821.1.p1, GFLL01142817.1.p2, GFLL01142857.1.p1, GFLL01152389.1.p1, GFLL01168096.1.p1, gb|GFBO01021993.1|.p1, gb|GFBO01056669…	GGJH01011140.1.p1, GGJH01020467.1.p1, GGJH01024007.1.p1, GGJH01024395.1.p1, GGJH01029313.1.p2, GGJH01035014.1.p1, GGJH01035608.1.p1	HAMI01000640.1.p1, HAMI01005534.1.p1, HAMI01007785.1.p2, HAMI01010941.1.p1, HAMI01015086.1.p1, HAMI01017005.1.p1, HAMI01018068.1.p1, HAMI01025457.1.p1	GBLJ01002935.1.p1, GBLJ01005729.1.p1, GBLJ01008764.1.p1, GBLJ01009094.1.p1, GBLJ01015772.1.p1, GBLJ01016677.1.p1, GBLJ01022999.1.p1, GBLJ01026012.1.p1, GBLJ01029198.1.p1, GBLJ01030482.1.p1, GBLJ01031865.1.p1, gb|GESU01008647.1|.p1, gb|GESU01016113.1|.p2, gb|GESU01028810.1|.p1, gb|GESU01034508.1|.p1	PILA_10915, gb|GEUZ01000269.1|.p1	GFHB01010789.1.p1, GFHB01020958.1.p1, GFHB01031630.1.p1, GFHB01073379.1.p1, GFHB01090852.1.p1, GFHB01100111.1.p1, GFHB01101492.1.p1, GFHB01104763.1.p1, GFHB01111290.1.p1, GFHB01128437.1.p1, GFHB01132929.1.p1, GFHB01135358.1.p2, GFHB01140581.1.p1	GBQX01017277.1.p1, GBQX01027149.1.p1, GBQX01028249.1.p2, GBQX01032522.1.p1, GBQX01038034.1.p1	GECO01022964.1.p1, GECO01035213.1.p1, GECO01047269.1.p1, GECO01048070.1.p1, GGAU01015862.1.p1, GGAU01018373.1.p2, GGAU01018390.1.p1, GGAU01018531.1.p2, GGAU01021395.1.p2, GGAU01024070.1.p1, GGAU01024210.1.p2, GGAU01028005.1.p1, GGAU01031458.1.p1, GGAU01037514.1.p2, GGAU01037853.1.p3, GGAU01038246.1.p1, GGAU01039406.1.p2, GGAU01040114.1.p2, GGAU01047051.1.p1, GGAU01048108.1.p1, GGAU01049895.1.p1	GGJK01014883.1.p1, GGJK01024386.1.p1, GGJK01034541.1.p1, GGJK01042278.1.p1	1A_I11_VO_L_61359_T_1_6_1 C_0.937_Length_909 type=cds; aalen=149_49%_complete-utrpoor; clen=909; strand=+; offs=65-514; evgclass=main_okay_match_1A_I11_VO_L_61359_T_2_6 C_0.476_Length_490_pct_100_100;, 1A_I5_VO_L_4845_T_39_49_1 C_0.086_Length_1266 type=cds; aalen=277_65%_complete; clen=1266; strand=+; offs=83-916; evgclass=main_okay_match_1A_I5_VO_L_4845_T_30_49 C_0.086_Length_837_pct_100_99;, 1A…	GFZL01003798.1.p1, GFZL01012630.1.p1, GFZL01013036.1.p1, GFZL01014382.1.p1, GFZL01014768.1.p1, GFZL01015038.1.p1, GFZL01015610.1.p2, GFZL01015721.1.p1, GFZL01016006.1.p1, GFZL01019082.1.p1, GFZL01019198.1.p1, GFZL01019285.1.p2, GFZL01019468.1.p1, GFZL01019693.1.p1, GFZL01019916.1.p1, GFZL01020238.1.p1, GFZL01021207.1.p1, GFZL01022553.1.p1, GFZL01023881.1.p1, GFZL01024867.1.p1, GFZL01025255.1.p2, …	GAZW02008917.1.p2, GAZW02014641.1.p2, GAZW02025372.1.p1, GAZW02028755.1.p1, GAZW02033511.1.p1, GAZW02033757.1.p1, GAZW02057569.1.p1, GAZW02102589.1.p1, GAZW02103025.1.p1, GAZW02103166.1.p1, GAZW02104375.1.p1, GFFY01000228.1.p1, GFFY01000834.1.p4, GFFY01001319.1.p1, GFFY01002992.1.p1, GFFY01004769.1.p1, GFFY01005549.1.p1, GFFY01007018.1.p1, GFFY01007062.1.p2, GFFY01007258.1.p1, GFFY01008018.1.p1, …	Thoc_c11145_g1_i1.p1, Thoc_c1172_g1_i1.p1, Thoc_c15130_g1_i1.p1, Thoc_c25476_g1_i1.p1, Thoc_c31534_g1_i1.p1, Thoc_c45320_g1_i1.p1, Thoc_c57770_g1_i1.p1	SEGI_00773, SEGI_02459, SEGI_02500, SEGI_02677, SEGI_03204, SEGI_07878, SEGI_07901, SEGI_08277, SEGI_08980, SEGI_10211, SEGI_12176, SEGI_14721, SEGI_18534, SEGI_19458, SEGI_20659, SEGI_20954, SEGI_23863, SEGI_26391, SEGI_26654, SEGI_28372, SEGI_28502, SEGI_31829, SEGI_35233, SEGI_35290, SEGI_35341, SEGI_36678, SEGI_37725, SEGI_38631, SEGI_39040, SEGI_40071	SESE_003820, SESE_020818, SESE_042697, SESE_048260, SESE_051340, SESE_056338, SESE_056393, SESE_057129, SESE_057739, SESE_058509, SESE_058520, SESE_058631, SESE_060010, SESE_060361, SESE_061952, SESE_062585, SESE_062726, SESE_063215, SESE_063947, SESE_065328, SESE_066969, SESE_067493, SESE_067989, SESE_069736, SESE_070007, SESE_070348, SESE_070701, SESE_070726, SESE_071455, SESE_071957, SESE_0719…
OG0000019	GGJG01002440.1.p1, GGJG01003432.1.p1, GGJG01011526.1.p1, GGJG01011962.1.p1, GGJG01012314.1.p1, GGJG01015830.1.p1, GGJG01021735.1.p2, GGJG01025697.1.p1, GGJG01032999.1.p1, GGJG01036637.1.p1, GGJG01037010.1.p1, GGJG01042627.1.p1	evm_27.model.AmTr_v1.0_scaffold00056.180 pacid=31568238 transcript=evm_27.model.AmTr_v1.0_scaffold00056.180 locus=evm_27.TU.AmTr_v1.0_scaffold00056.180 ID=evm_27.model.AmTr_v1.0_scaffold00056.180.v1.0 annot-version=v1.0, evm_27.model.AmTr_v1.0_scaffold00056.183 pacid=31568225 transcript=evm_27.model.AmTr_v1.0_scaffold00056.183 locus=evm_27.TU.AmTr_v1.0_scaffold00056.183 ID=evm_27.model.AmTr_v1.0_…	GBYR01016040.1.p1, GBYR01029966.1.p1, GGBW01002324.1.p1, GGBW01028973.1.p1, GGBW01028982.1.p2, GGBW01028983.1.p2, GGBW01041669.1.p2, GHLL01155032.1.p1, GHLL01182855.1.p1, GHLL01240701.1.p2, Gb_40741	TnS000031133t02, TnS000070227t11, TnS000072467t02, TnS000072467t03, TnS000076603t01, TnS000093607t01, TnS000095721t02, TnS000194271t10, TnS000194947t02, TnS000304669t01, TnS000304669t02, TnS000304669t03, TnS000350401t04, TnS000399835t02, TnS000461955t01, TnS000503755t02, TnS000532529t01, TnS000532529t02, TnS000532529t04, TnS000573847t03, TnS000605625t01, TnS000678767t02, TnS000765969t05, TnS00076…	Megl_c27685_g3_i2.p1, Megl_c27685_g4_i5.p2, Megl_c27685_g6_i5.p1, Megl_c27685_g9_i1.p1, Megl_c28522_g1_i1.p1, Megl_c28522_g2_i1.p2	GCHX01054978.1.p1, GCHX01253320.1.p1, GCHX01348370.1.p1, GCHX01349217.1.p1, GCZO01103943.1.p1, GCZO01201329.1.p1, GCZO01307467.1.p1, GCZO01307903.1.p1, gb|GFBZ01022997.1|.p1, gi|830827097|gb|GCZO01349040.1|.p3, gi|830834537|gb|GCZO01341602.1|.p1, gi|830835670|gb|GCZO01340469.1|.p2, gi|830846410|gb|GCZO01329731.1|.p1, gi|830860111|gb|GCZO01316033.1|.p1, gi|830860740|gb|GCZO01315404.1|.p3, gi|83090…	GGJJ01000229.1.p2, GGJJ01001404.1.p1, GGJJ01002499.1.p1, GGJJ01007921.1.p1, GGJJ01009343.1.p1, GGJJ01009707.1.p1, GGJJ01012563.1.p2, GGJJ01019433.1.p1, GGJJ01021855.1.p1, GGJJ01023757.1.p1, GGJJ01024698.1.p1, GGJJ01024875.1.p1, GGJJ01025313.1.p1, GGJJ01026220.1.p1, GGJJ01026446.1.p1, GGJJ01026502.1.p1, GGJJ01026815.1.p1, GGJJ01027697.1.p1, GGJJ01027823.1.p1, GGJJ01029294.1.p1, GGJJ01030749.1.p1, …	GDQR01000729.1.p1, GDQR01001418.1.p1, GDQR01014879.1.p2, GDQR01015621.1.p1, GDQR01016785.1.p1, GFLL01018360.1.p1, GFLL01025076.1.p1, GFLL01041948.1.p1, GFLL01042530.1.p1, GFLL01048012.1.p1, GFLL01050285.1.p1, GFLL01054321.1.p1, GFLL01063574.1.p1, GFLL01069367.1.p1, GFLL01077721.1.p1, GFLL01080937.1.p1, GFLL01081028.1.p1, GFLL01081817.1.p1, GFLL01081818.1.p1, GFLL01083418.1.p1, GFLL01084080.1.p1, …	GGJH01003384.1.p1, GGJH01004796.1.p1, GGJH01010133.1.p1, GGJH01019307.1.p1, GGJH01020473.1.p1, GGJH01020742.1.p1, GGJH01024739.1.p1, GGJH01025169.1.p1, GGJH01027511.1.p1, GGJH01027565.1.p1, GGJH01030028.1.p1, GGJH01033634.1.p1, GGJH01036108.1.p1, GGJH01036455.1.p1, GGJH01036983.1.p1, GGJH01041003.1.p1, GGJH01044763.1.p1, GGJH01046348.1.p1	HAMI01000170.1.p1, HAMI01002197.1.p1, HAMI01002440.1.p1, HAMI01002470.1.p1, HAMI01002527.1.p1, HAMI01003184.1.p1, HAMI01011284.1.p1, HAMI01011856.1.p1, HAMI01012540.1.p1, HAMI01012871.1.p2, HAMI01016429.1.p1, HAMI01017142.1.p1, HAMI01019372.1.p1, HAMI01020132.1.p1, HAMI01021636.1.p1, HAMI01026795.1.p1	GBLJ01000855.1.p1, GBLJ01002526.1.p1, GBLJ01020092.1.p1, GBLJ01021119.1.p1, GBLJ01042326.1.p1, GBLJ01042710.1.p1, GBLJ01044063.1.p1, GBLJ01045895.1.p1, gb|GESU01000285.1|.p1, gb|GESU01017266.1|.p2, gb|GESU01017267.1|.p1, gb|GESU01017381.1|.p1, gb|GESU01017645.1|.p1, gb|GESU01020557.1|.p1, gb|GESU01042974.1|.p1, gb|GESU01043736.1|.p1, gb|GESU01043879.1|.p1	PILA_02547, PILA_03357, PILA_04559, PILA_04560, PILA_04923, PILA_09402, PILA_09405, PILA_09674, PILA_10305, PILA_10307, PILA_11542, PILA_12421, PILA_13526, PILA_14374, PILA_15452, PILA_18450, PILA_18931, PILA_19165, PILA_19591, PILA_20246, PILA_20396, PILA_22853, PILA_23107, PILA_24451, PILA_24518, PILA_24561, PILA_26108, PILA_27602, PILA_27827, PILA_28635, PILA_28711, PILA_28819, PILA_32978, PIL…	GAQR01018382.1.p1, GAQR01019096.1.p1, GAQR01035065.1.p1, GAQR01045497.1.p1, GAQR01045892.1.p1, GAQR01045894.1.p1, GFHB01005290.1.p1, GFHB01015225.1.p1, GFHB01016957.1.p1, GFHB01026485.1.p1, GFHB01029255.1.p2, GFHB01038509.1.p1, GFHB01043233.1.p1, GFHB01058534.1.p1, GFHB01062359.1.p1, GFHB01073940.1.p1, GFHB01074693.1.p1, GFHB01088988.1.p1, GFHB01093108.1.p1, GFHB01095256.1.p1, GFHB01112307.1.p1, …	GBQX01034998.1.p1, GBQX01037407.1.p1, GBQX01042838.1.p1	GECO01004869.1.p1, GECO01009746.1.p1, GECO01011086.1.p1, GECO01014838.1.p1, GECO01015519.1.p1, GECO01019877.1.p1, GECO01025437.1.p1, GECO01025876.1.p1, GECO01026178.1.p1, GECO01027440.1.p1, GECO01028409.1.p1, GECO01029057.1.p1, GECO01030575.1.p1, GECO01030769.1.p1, GECO01033609.1.p1, GECO01034022.1.p1, GECO01035584.1.p1, GECO01036043.1.p1, GECO01036165.1.p1, GECO01038317.1.p1, GECO01039313.1.p1, …	GGJK01003058.1.p1, GGJK01008154.1.p1, GGJK01009098.1.p1, GGJK01009738.1.p1, GGJK01013420.1.p1, GGJK01014000.1.p2, GGJK01018261.1.p1, GGJK01019200.1.p1, GGJK01020800.1.p1, GGJK01021906.1.p1, GGJK01022112.1.p1, GGJK01022153.1.p1, GGJK01023077.1.p1, GGJK01023466.1.p2, GGJK01027894.1.p1, GGJK01028960.1.p1, GGJK01029906.1.p1, GGJK01030058.1.p1, GGJK01030890.1.p1, GGJK01031599.1.p1, GGJK01033235.1.p1, …	1A_I3_VO_L_1_T_120751_136734_1 C_0.000_Length_612 type=cds; aalen=157_77%_complete; clen=612; strand=-; offs=563-90; evgclass=main_okay_match_1A_I3_NT_comp45212_c0_seq3_pct_98_94;, 1A_I3_VO_L_1_T_120782_136734_1 C_0.000_Length_701 type=cds; aalen=155_66%_complete; clen=701; strand=-; offs=511-44; evgclass=main_okay_match_1A_I3_VO_L_1_T_120789_136734 C_0.000_Length_663_pct_100_100;, 1A_I5_VO_L_231…	GFZL01000389.1.p1, GFZL01000817.1.p1, GFZL01000830.1.p1, GFZL01001126.1.p1, GFZL01006081.1.p1, GFZL01007794.1.p1, GFZL01013873.1.p1, GFZL01014167.1.p1, GFZL01017082.1.p1, GFZL01018460.1.p1, GFZL01020827.1.p2, GFZL01021197.1.p1, GFZL01021546.1.p1, GFZL01021727.1.p1, GFZL01022536.1.p1, GFZL01022883.1.p1, GFZL01024190.1.p1, GFZL01025762.1.p1, GFZL01026500.1.p1, GFZL01027413.1.p1, GFZL01027600.1.p1, …	GAZW02003809.1.p1, GAZW02011271.1.p1, GAZW02013640.1.p1, GAZW02039996.1.p1, GAZW02040003.1.p1, GAZW02053057.1.p1, GAZW02062175.1.p1, GAZW02071754.1.p1, GAZW02081377.1.p1, GAZW02081379.1.p1, GAZW02083012.1.p1, GAZW02083028.1.p1, GAZW02088624.1.p1, GAZW02088629.1.p1, GAZW02092420.1.p1, GAZW02092422.1.p1, GAZW02102539.1.p1, GAZW02102545.1.p1, GFFY01003222.1.p2, GFFY01004190.1.p2, GFFY01005281.1.p2, …	Thoc_c27935_g3_i1.p1, Thoc_c27962_g2_i3.p3, Thoc_c27962_g4_i1.p1, Thoc_c27962_g5_i1.p1, Thoc_c28702_g1_i10.p1, Thoc_c53821_g1_i1.p1	SEGI_00535, SEGI_00604, SEGI_04267, SEGI_05206, SEGI_06231, SEGI_07689, SEGI_13219, SEGI_13456, SEGI_13812, SEGI_17704, SEGI_27433, SEGI_34497, SEGI_41427, SEGI_41588	SESE_026068, SESE_028266, SESE_028586, SESE_028685, SESE_030897, SESE_031449, SESE_033721, SESE_035023, SESE_037473, SESE_038366, SESE_038778, SESE_056248, SESE_058632, SESE_077786, SESE_081881, SESE_085218, SESE_096697, SESE_098151, SESE_100900, SESE_103001, SESE_103008, SESE_110069, SESE_116310, SESE_118911, SESE_120323, SESE_124736, SESE_147097
OG0000020	GGJG01011490.1.p1, GGJG01014966.1.p1, GGJG01017379.1.p1, GGJG01018342.1.p1, GGJG01018660.1.p1, GGJG01019463.1.p1, GGJG01039104.1.p1, GGJG01042099.1.p1	evm_27.model.AmTr_v1.0_scaffold00002.378 pacid=31562756 transcript=evm_27.model.AmTr_v1.0_scaffold00002.378 locus=evm_27.TU.AmTr_v1.0_scaffold00002.378 ID=evm_27.model.AmTr_v1.0_scaffold00002.378.v1.0 annot-version=v1.0, evm_27.model.AmTr_v1.0_scaffold00002.379 pacid=31562752 transcript=evm_27.model.AmTr_v1.0_scaffold00002.379 locus=evm_27.TU.AmTr_v1.0_scaffold00002.379 ID=evm_27.model.AmTr_v1.0_…	GBYR01004275.1.p1, GBYR01029640.1.p1, GBYR01038289.1.p1, GBYR01044220.1.p1, GBYR01046661.1.p1, GBYR01066863.1.p1, GGBW01005172.1.p1, GGBW01005175.1.p1, GGBW01005176.1.p1, GGBW01005178.1.p1, GGBW01005180.1.p1, GGBW01038516.1.p3, GHLL01195508.1.p1, GHLL01195509.1.p1, GHLL01201458.1.p1, GHLL01248435.1.p1, GHLL01355565.1.p1, Gb_04649, Gb_06280, Gb_06858, Gb_06859, Gb_06860, Gb_07711, Gb_15982, Gb_174…	TnS000261797t01	Megl_c19621_g1_i1.p1, Megl_c21040_g2_i1.p1, Megl_c23343_g2_i2.p1, Megl_c24461_g1_i1.p1, Megl_c26688_g1_i2.p1, Megl_c26688_g1_i2.p2, Megl_c27945_g2_i1.p1, Megl_c28623_g1_i1.p1, Megl_c38840_g1_i1.p1, Megl_c5361_g1_i1.p1	GCHX01154471.1.p1, GCZO01000110.1.p1, GCZO01106045.1.p1, GCZO01109285.1.p1, GCZO01204134.1.p1, GCZO01308895.1.p1, gi|830920040|gb|GCZO01260134.1|.p1, gi|830921452|gb|GCZO01258722.1|.p1, gi|831018256|gb|GCZO01162187.1|.p1, gi|831022710|gb|GCZO01157734.1|.p1, gi|831036823|gb|GCZO01143622.1|.p1, gi|831036939|gb|GCZO01143506.1|.p1, gi|831085059|gb|GCZO01095398.1|.p1, gi|831088040|gb|GCZO01092418.1|.p…	GGJJ01011735.1.p1, GGJJ01012704.1.p1, GGJJ01015243.1.p1, GGJJ01023111.1.p1, GGJJ01032192.1.p1, GGJJ01037126.1.p1, GGJJ01038122.1.p1, GGJJ01039421.1.p2, GGJJ01046126.1.p1, GGJJ01056555.1.p1	GDQR01003911.1.p1, GDQR01021576.1.p1, GFLL01045979.1.p1, GFLL01068045.1.p1, GFLL01083068.1.p1, GFLL01083069.1.p1, GFLL01102249.1.p1, GFLL01102252.1.p1, GFLL01106732.1.p1, gb|GFBO01076535.1|.p1, gb|GFBO01077028.1|.p1, gb|GFBO01095169.1|.p1	GGJH01000530.1.p1, GGJH01011906.1.p1, GGJH01014768.1.p1, GGJH01019663.1.p1, GGJH01020963.1.p1, GGJH01029013.1.p1	HAMI01000989.1.p1, HAMI01004807.1.p1, HAMI01007448.1.p1, HAMI01015342.1.p1, HAMI01018792.1.p1, HAMI01020850.1.p1, HAMI01025612.1.p1, HAMI01026001.1.p1, HAMI01038200.1.p1, HAMI01040113.1.p1	GBLJ01015822.1.p1, gb|GESU01040596.1|.p1, gb|GESU01043856.1|.p1	PILA_00716, PILA_00866, PILA_01963, PILA_01975, PILA_01976, PILA_02100, PILA_04133, PILA_05160, PILA_11943, PILA_11945, PILA_13227, PILA_13700, PILA_15045, PILA_15981, PILA_16888, PILA_19317, PILA_22399, PILA_22985, PILA_24849, PILA_26204, PILA_26205, PILA_26805, PILA_27551, PILA_28846, PILA_29283, PILA_32080, PILA_32431, PILA_32832, PILA_33593, PILA_33708, PILA_35499, PILA_36911, gb|GEUZ01003563…	GAQR01037149.1.p1, GAQR01042143.1.p1, GAQR01042152.1.p1, GAQR01049134.1.p1, GFHB01035650.1.p1, GFHB01052002.1.p1, GFHB01074261.1.p1, GFHB01075334.1.p1, GFHB01088323.1.p1, GFHB01121783.1.p1, GFHB01130453.1.p1, GFHB01132533.1.p1, GFHB01155293.1.p1, GFHB01193989.1.p1	GBQX01035253.1.p1, GBQX01038063.1.p1, GBQX01041355.1.p1, GDQD01008339.1.p1, GDQD01008565.1.p1	GECO01003564.1.p1, GECO01004327.1.p1, GECO01005593.1.p1, GECO01005620.1.p1, GECO01015306.1.p1, GECO01017169.1.p1, GECO01017775.1.p1, GECO01025867.1.p1, GECO01029080.1.p1, GECO01031809.1.p1, GECO01032816.1.p1, GECO01033624.1.p1, GECO01034134.1.p1, GECO01034448.1.p1, GECO01036391.1.p1, GECO01039486.1.p1, GECO01039905.1.p1, GECO01043112.1.p1, GECO01043248.1.p1, GECO01043800.1.p1, GECO01048532.1.p1, …	GGJK01013151.1.p1, GGJK01017422.1.p1, GGJK01017572.1.p1, GGJK01017637.1.p1, GGJK01028497.1.p1, GGJK01029265.1.p1, GGJK01029620.1.p1, GGJK01038617.1.p1, GGJK01038922.1.p1, GGJK01043796.1.p1	1A_I11_NT_comp49858_c0_seq21_1 type=cds; aalen=591_89%_complete; clen=1992; strand=+; offs=17-1792; evgclass=main_okay_match_1A_I11_OT_comp49822_c0_seq16_pct_98_92;, 1A_I11_VO_L_1_T_82848_226447_1 C_0.000_Length_1573 type=cds; aalen=472_90%_complete; clen=1573; strand=-; offs=1453-35; evgclass=main_okay_match_1A_I11_VO_L_1_T_82846_226447 C_0.000_Length_1576_pct_99_91;, 1A_I3_NT_comp49106_c0_seq3_…	GFZL01011359.1.p1, GFZL01011559.1.p1, GFZL01012194.1.p1, GFZL01012397.1.p1, GFZL01012486.1.p1, GFZL01012525.1.p1, GFZL01012526.1.p1, GFZL01012527.1.p1, GFZL01012625.1.p1, GFZL01012655.1.p1, GFZL01013473.1.p1, GFZL01013486.1.p1, GFZL01019824.1.p1, GFZL01019913.1.p1, GFZL01019933.1.p1, GFZL01019950.1.p1, GFZL01020114.1.p1, GFZL01020269.1.p1, GFZL01020661.1.p1, GFZL01024619.1.p1, GFZL01024796.1.p1, …	GAZW02045060.1.p1, GAZW02045069.1.p1, GAZW02045070.1.p1, GAZW02045073.1.p1, GAZW02048636.1.p1, GAZW02063757.1.p1, GAZW02075122.1.p1, GAZW02075126.1.p1, GAZW02075127.1.p2, GAZW02081485.1.p1, GAZW02090842.1.p1, GAZW02090844.1.p1, GAZW02090881.1.p1, GFFY01009323.1.p1, GFFY01011165.1.p1, GFFY01011556.1.p1, GFFY01026928.1.p1, GFFY01041451.1.p1, GFFY01045127.1.p1, GFFY01050623.1.p1, GFFY01059600.1.p1, …	Thoc_c16417_g2_i1.p1, Thoc_c20036_g1_i1.p1, Thoc_c21159_g1_i1.p1, Thoc_c23525_g1_i1.p1, Thoc_c25536_g1_i1.p1, Thoc_c26658_g1_i1.p1, Thoc_c28396_g2_i2.p1, Thoc_c28799_g1_i1.p1, Thoc_c28799_g2_i2.p1, Thoc_c28799_g2_i3.p1, Thoc_c28799_g2_i7.p1, Thoc_c28896_g2_i2.p1, Thoc_c28913_g1_i1.p1, Thoc_c28970_g1_i2.p1, Thoc_c28970_g1_i6.p1, Thoc_c52940_g1_i1.p1	SEGI_00196, SEGI_02761, SEGI_02893, SEGI_03902, SEGI_04244, SEGI_04351, SEGI_04391, SEGI_05720, SEGI_09693, SEGI_09909, SEGI_10144, SEGI_10656, SEGI_10778, SEGI_10810, SEGI_10913, SEGI_11480, SEGI_12008, SEGI_13588, SEGI_13688, SEGI_14117, SEGI_15144, SEGI_16909, SEGI_17361, SEGI_18643, SEGI_19645, SEGI_19912, SEGI_20608, SEGI_21248, SEGI_21887, SEGI_24905, SEGI_25296, SEGI_25906, SEGI_25958, SEG…	SESE_002716, SESE_026975, SESE_027807, SESE_028193, SESE_030487, SESE_030865, SESE_033618, SESE_034828, SESE_037900, SESE_039079, SESE_041119, SESE_045853, SESE_056152, SESE_056571, SESE_057610, SESE_057724, SESE_058449, SESE_058516, SESE_060935, SESE_061745, SESE_061875, SESE_061902, SESE_062327, SESE_065835, SESE_066383, SESE_068094, SESE_068464, SESE_069617, SESE_070995, SESE_072560, SESE_0745…
OG0000021	GGJG01001038.1.p1, GGJG01002572.1.p1, GGJG01005985.1.p1, GGJG01009038.1.p1, GGJG01009786.1.p1, GGJG01011324.1.p1, GGJG01016668.1.p1, GGJG01019065.1.p1, GGJG01021557.1.p1, GGJG01022395.1.p1, GGJG01027975.1.p1, GGJG01028698.1.p1, GGJG01030795.1.p1, GGJG01030955.1.p1, GGJG01032435.1.p1, GGJG01038146.1.p1, GGJG01038931.1.p1, GGJG01040645.1.p1, GGJG01044655.1.p1	evm_27.model.AmTr_v1.0_scaffold00038.174 pacid=31571034 transcript=evm_27.model.AmTr_v1.0_scaffold00038.174 locus=evm_27.TU.AmTr_v1.0_scaffold00038.174 ID=evm_27.model.AmTr_v1.0_scaffold00038.174.v1.0 annot-version=v1.0, evm_27.model.AmTr_v1.0_scaffold00038.181 pacid=31570926 transcript=evm_27.model.AmTr_v1.0_scaffold00038.181 locus=evm_27.TU.AmTr_v1.0_scaffold00038.181 ID=evm_27.model.AmTr_v1.0_…	GBYR01022974.1.p1, GBYR01038028.1.p1, GGBW01000904.1.p1, GGBW01000907.1.p1, GGBW01000909.1.p2, GGBW01000910.1.p1, GGBW01000911.1.p1, GGBW01000915.1.p1, GHLL01184681.1.p1, GHLL01235377.1.p1, GHLL01274520.1.p1, GHLL01511123.1.p1, Gb_00330, Gb_00587, Gb_08877, Gb_19141, Gb_23432, Gb_30219, Gb_30221, Gb_30222, Gb_30223, Gb_30225, Gb_30227, Gb_30229, Gb_30235, Gb_38270	TnS000506885t02, TnS000506885t03	Megl_c22384_g2_i1.p1, Megl_c23227_g1_i1.p1, Megl_c24065_g1_i1.p1, Megl_c27062_g1_i1.p1, Megl_c28369_g1_i2.p1, Megl_c28422_g3_i10.p1	GCHX01149295.1.p1, GCHX01248549.1.p1, GCHX01350839.1.p1, GCZO01007043.1.p1, GCZO01207713.1.p1, GCZO01302175.1.p1, gb|GFBZ01002173.1|.p1, gi|830824117|gb|GCZO01352019.1|.p1, gi|830899302|gb|GCZO01280872.1|.p1, gi|830962303|gb|GCZO01217873.1|.p1, gi|831058307|gb|GCZO01122140.1|.p1	GGJJ01004284.1.p1, GGJJ01011635.1.p1, GGJJ01016966.1.p1, GGJJ01020306.1.p1, GGJJ01020307.1.p1, GGJJ01033947.1.p1, GGJJ01034831.1.p1, GGJJ01035425.1.p1, GGJJ01039021.1.p1, GGJJ01045629.1.p1, GGJJ01055959.1.p2	GDQR01002078.1.p1, GDQR01002553.1.p1, GDQR01004900.1.p1, GDQR01014107.1.p1, GFLL01016878.1.p1, GFLL01044260.1.p1, GFLL01090712.1.p1, GFLL01120245.1.p1, gb|GFBO01061903.1|.p1, gb|GFBO01087018.1|.p1	GGJH01006937.1.p1, GGJH01007259.1.p1, GGJH01008560.1.p1, GGJH01018557.1.p1, GGJH01019923.1.p1, GGJH01022726.1.p1, GGJH01024712.1.p1, GGJH01029258.1.p1, GGJH01030359.1.p1, GGJH01030730.1.p1, GGJH01030908.1.p1, GGJH01038003.1.p1, GGJH01039760.1.p1, GGJH01041717.1.p1, GGJH01042526.1.p1, GGJH01046185.1.p1	HAMI01000723.1.p1, HAMI01001035.1.p1, HAMI01001435.1.p2, HAMI01001640.1.p1, HAMI01005587.1.p1, HAMI01006743.1.p1, HAMI01013462.1.p1, HAMI01017427.1.p1, HAMI01017691.1.p1, HAMI01020345.1.p1, HAMI01020381.1.p1, HAMI01024626.1.p1, HAMI01029696.1.p1, HAMI01040156.1.p1	GBLJ01000366.1.p1, GBLJ01003099.1.p1, GBLJ01010553.1.p1, GBLJ01012272.1.p1, GBLJ01015386.1.p1, GBLJ01038058.1.p1, GBLJ01042147.1.p1, GBLJ01044793.1.p1	PILA_01262, PILA_01263, PILA_04888, PILA_07216, PILA_07770, PILA_11544, PILA_11646, PILA_11648, PILA_13644, PILA_14913, PILA_15249, PILA_15251, PILA_17399, PILA_18376, PILA_19585, PILA_21313, PILA_23834, PILA_27488, PILA_28746, PILA_33936, PILA_33937, PILA_34696, PILA_35491, gb|GEUZ01006575.1|.p1, gb|GEUZ01006667.1|.p1, gb|GEUZ01006975.1|.p1, gb|GEUZ01007088.1|.p1, gb|GEUZ01008403.1|.p1, gb|GEUZ0…	GAQR01003460.1.p1, GAQR01006008.1.p1, GAQR01009519.1.p2, GAQR01014428.1.p1, GAQR01034816.1.p1, GAQR01034823.1.p1, GAQR01038580.1.p1, GAQR01038582.1.p1, GAQR01038586.1.p1, GAQR01040511.1.p1, GAQR01047739.1.p1, GAQR01047746.1.p1, GFHB01028433.1.p1, GFHB01090986.1.p1, GFHB01123685.1.p1, GFHB01127989.1.p1, GFHB01151121.1.p1, GFHB01153807.1.p1	GBQX01023736.1.p1, GBQX01033376.1.p1, GBQX01033943.1.p1, GBQX01034610.1.p1, GBQX01036570.1.p1, GBQX01047348.1.p1, GDQD01007132.1.p1, GDQD01007168.1.p1, GDQD01008285.1.p1	GECO01003619.1.p1, GECO01009937.1.p1, GECO01014896.1.p1, GECO01014897.1.p1, GECO01017147.1.p1, GECO01018268.1.p1, GECO01024648.1.p1, GECO01026567.1.p1, GECO01039581.1.p1, GECO01043355.1.p1, GECO01044407.1.p1, GECO01049988.1.p1, GGAU01002394.1.p1, GGAU01003052.1.p4, GGAU01047263.1.p1	GGJK01006241.1.p1, GGJK01006531.1.p1, GGJK01007689.1.p1, GGJK01007690.1.p1, GGJK01013926.1.p1, GGJK01016072.1.p1, GGJK01020210.1.p1, GGJK01022590.1.p1, GGJK01025320.1.p1, GGJK01025763.1.p1, GGJK01025838.1.p1, GGJK01029270.1.p1, GGJK01030008.1.p1, GGJK01035816.1.p1, GGJK01039759.1.p1, GGJK01040911.1.p1, GGJK01043155.1.p1	1A_I11_VO_L_1_T_111011_226447_1 C_0.000_Length_1789 type=cds; aalen=501_84%_complete; clen=1789; strand=+; offs=84-1589; evgclass=main_okay_match_2A_I27_VO_L_2134_T_14_47 C_0.089_Length_997_pct_99_91;, 1A_I3_VO_L_1_T_83469_136734_1 C_0.000_Length_1341 type=cds; aalen=367_82%_complete; clen=1341; strand=+; offs=191-1294; evgclass=main_okay_match_1A_I3_VO_L_1_T_83468_136734 C_0.000_Length_1285_pct_…	GFZL01007239.1.p1, GFZL01014338.1.p1, GFZL01016584.1.p1, GFZL01019902.1.p1, GFZL01020413.1.p1, GFZL01020836.1.p1, GFZL01023012.1.p1, GFZL01023648.1.p1, GFZL01024655.1.p1, GFZL01024672.1.p1, GFZL01024946.1.p1, GFZL01025645.1.p1	GAZW02006425.1.p1, GAZW02043763.1.p1, GAZW02049975.1.p1, GAZW02070025.1.p1, GAZW02078028.1.p1, GAZW02088256.1.p1, GAZW02088259.1.p1, GFFY01014338.1.p1, GFFY01014779.1.p1, GFFY01023163.1.p1, GFFY01024328.1.p1, GFFY01031919.1.p1, GFFY01043433.1.p2, GFFY01126230.1.p1, PSME_02912, PSME_02913, PSME_06548, PSME_10987, PSME_12488, PSME_16678, PSME_17028, PSME_18638, PSME_21018, PSME_24560, PSME_24561, P…	Thoc_c17519_g1_i1.p1, Thoc_c25861_g1_i1.p1, Thoc_c27138_g2_i2.p1, Thoc_c27138_g2_i2.p2, Thoc_c27138_g3_i1.p1, Thoc_c27605_g1_i1.p1, Thoc_c27859_g1_i2.p1, Thoc_c27859_g1_i2.p2, Thoc_c27859_g1_i5.p1, Thoc_c27859_g1_i6.p1, Thoc_c28137_g1_i2.p1, Thoc_c28137_g1_i3.p1, Thoc_c28137_g1_i4.p2, Thoc_c28195_g1_i3.p1	SEGI_00101, SEGI_00464, SEGI_01447, SEGI_01743, SEGI_02693, SEGI_02793, SEGI_03333, SEGI_03385, SEGI_04060, SEGI_04552, SEGI_05603, SEGI_06289, SEGI_06380, SEGI_06951, SEGI_08722, SEGI_08817, SEGI_08819, SEGI_08977, SEGI_10064, SEGI_10550, SEGI_11184, SEGI_13477, SEGI_13561, SEGI_14243, SEGI_14804, SEGI_16970, SEGI_17119, SEGI_19106, SEGI_19853, SEGI_20671, SEGI_20672, SEGI_20949, SEGI_20976, SEG…	SESE_000741, SESE_009432, SESE_012867, SESE_016757, SESE_020047, SESE_022428, SESE_028271, SESE_028534, SESE_029013, SESE_029171, SESE_032433, SESE_034033, SESE_034935, SESE_037555, SESE_037779, SESE_038269, SESE_038871, SESE_038926, SESE_040555, SESE_042197, SESE_056619, SESE_057471, SESE_057529, SESE_057692, SESE_058313, SESE_058367, SESE_058441, SESE_058924, SESE_059126, SESE_059561, SESE_0602…
OG0000022	GGJG01000496.1.p1, GGJG01002262.1.p1, GGJG01011960.1.p1, GGJG01012313.1.p1, GGJG01015829.1.p1, GGJG01023536.1.p1, GGJG01026470.1.p1, GGJG01028526.1.p1, GGJG01032327.1.p1, GGJG01034671.1.p1, GGJG01043251.1.p1, GGJG01044565.1.p1		GBYR01039491.1.p1, GGBW01028980.1.p1, GGBW01039448.1.p1, GGBW01041706.1.p1, GGBW01044335.1.p1, Gb_08636, Gb_12080, Gb_12303, Gb_28720	TnS000076257t04, TnS000076603t02, TnS000095721t01, TnS000194947t01, TnS000194947t06, TnS000226533t03, TnS000245783t02, TnS000290933t01, TnS000503755t01, TnS000527601t02, TnS000527601t05, TnS000538531t01, TnS000918931t01, TnS000947235t01, TnS000981265t02, TnS001009125t01, TnS001020615t01, TnS001030217t01, TnS013884962t01	Megl_c26533_g1_i2.p1, Megl_c27685_g4_i2.p1, Megl_c27685_g6_i5.p2, Megl_c27685_g8_i1.p1, Megl_c28522_g1_i3.p1, Megl_c28522_g2_i1.p1, Megl_c28522_g3_i1.p1	GCHX01152353.1.p1, GCHX01247149.1.p1, GCHX01247194.1.p1, GCHX01248603.1.p1, GCHX01248796.1.p1, GCHX01347299.1.p1, GCHX01352593.1.p1, GCHX01353081.1.p1, GCHX01355021.1.p1, GCHX01451996.1.p1, GCZO01006387.1.p1, GCZO01100029.1.p1, GCZO01208823.1.p1, gb|GFBZ01010832.1|.p1, gb|GFBZ01014415.1|.p1, gb|GFBZ01018664.1|.p1, gi|830822525|gb|GCZO01353611.1|.p1, gi|830827283|gb|GCZO01348854.1|.p1, gi|83082757…	GGJJ01003125.1.p1, GGJJ01003563.1.p1, GGJJ01017329.1.p1, GGJJ01024223.1.p1, GGJJ01025246.1.p1, GGJJ01026611.1.p1, GGJJ01026982.1.p1, GGJJ01027068.1.p1, GGJJ01027069.1.p1, GGJJ01028578.1.p1, GGJJ01029173.1.p1, GGJJ01029821.1.p1, GGJJ01031546.1.p1, GGJJ01033053.1.p1, GGJJ01033550.1.p1, GGJJ01034028.1.p1, GGJJ01034807.1.p1, GGJJ01035405.1.p1, GGJJ01035766.1.p1, GGJJ01037158.1.p1, GGJJ01037722.1.p1, …	GDQR01004461.1.p1, GDQR01012053.1.p1, GDQR01017186.1.p1, GFLL01063335.1.p1, GFLL01064447.1.p1, GFLL01064449.1.p1, GFLL01064451.1.p1, GFLL01073146.1.p1, GFLL01084608.1.p1, GFLL01093127.1.p1, GFLL01098186.1.p1, GFLL01098208.1.p1, GFLL01101593.1.p1, GFLL01101606.1.p1, GFLL01107931.1.p1, GFLL01107940.1.p1, GFLL01114479.1.p1, GFLL01114481.1.p1, GFLL01114482.1.p1, GFLL01115826.1.p1, GFLL01115834.1.p1, …	GGJH01003383.1.p1, GGJH01009069.1.p1, GGJH01016006.1.p1, GGJH01016742.1.p1, GGJH01018331.1.p1, GGJH01025988.1.p1, GGJH01033140.1.p1, GGJH01034244.1.p1, GGJH01038110.1.p1, GGJH01039736.1.p1, GGJH01043256.1.p1	HAMI01004957.1.p1, HAMI01005987.1.p1, HAMI01018571.1.p1, HAMI01019207.1.p1, HAMI01030057.1.p1, HAMI01032875.1.p2, HAMI01033456.1.p1	GBLJ01005157.1.p1, GBLJ01005295.1.p1, GBLJ01006280.1.p1, GBLJ01018262.1.p1, GBLJ01019225.1.p1, GBLJ01024168.1.p1, GBLJ01047440.1.p1	PILA_02003, PILA_02826, PILA_03708, PILA_04021, PILA_04050, PILA_04561, PILA_04918, PILA_07018, PILA_09095, PILA_09672, PILA_11730, PILA_14789, PILA_15003, PILA_16366, PILA_19163, PILA_19491, PILA_20458, PILA_22275, PILA_22557, PILA_22600, PILA_22605, PILA_22852, PILA_23776, PILA_25281, PILA_25385, PILA_26088, PILA_26112, PILA_27826, PILA_28263, PILA_28528, PILA_31460, PILA_31780, PILA_33033, PIL…	GAQR01012320.1.p1, GAQR01046245.1.p1, GAQR01046253.1.p1, GAQR01046254.1.p1, GAQR01046259.1.p1, GAQR01049060.1.p1, GFHB01002909.1.p1, GFHB01007955.1.p1, GFHB01016519.1.p1, GFHB01036987.1.p1, GFHB01042334.1.p1, GFHB01055437.1.p1, GFHB01103780.1.p1, GFHB01128214.1.p1, GFHB01142546.1.p1, GFHB01144027.1.p1, GFHB01151783.1.p1, GFHB01164172.1.p1, GFHB01171488.1.p1, GFHB01171988.1.p1, GFHB01180111.1.p1	GBQX01028757.1.p1, GBQX01033820.1.p1, GBQX01036016.1.p1, GBQX01036061.1.p1, GBQX01037087.1.p1, GDQD01007193.1.p1, GDQD01008191.1.p1, GDQD01008192.1.p1	GECO01003348.1.p1, GECO01003753.1.p1, GECO01010791.1.p1, GECO01012947.1.p1, GECO01013341.1.p1, GECO01014707.1.p1, GECO01018166.1.p1, GECO01021146.1.p1, GECO01025008.1.p1, GECO01028758.1.p1, GECO01031565.1.p1, GECO01032328.1.p1, GECO01032371.1.p1, GECO01033450.1.p1, GECO01035932.1.p1, GECO01037446.1.p1, GECO01038015.1.p1, GECO01038608.1.p1, GECO01038865.1.p1, GECO01040559.1.p1, GECO01040577.1.p1, …	GGJK01004319.1.p1, GGJK01011256.1.p1, GGJK01014836.1.p1, GGJK01017275.1.p1, GGJK01017354.1.p1, GGJK01019086.1.p1, GGJK01019166.1.p1, GGJK01019417.1.p1, GGJK01023697.1.p1, GGJK01026790.1.p1, GGJK01030974.1.p1, GGJK01031026.1.p1, GGJK01033562.1.p1, GGJK01036338.1.p1, GGJK01036462.1.p1, GGJK01042429.1.p1	1A_I3_VO_L_1_T_120559_136734_1 C_0.000_Length_2565 type=cds; aalen=798_93%_complete; clen=2565; strand=+; offs=153-2549; evgclass=main_okay_match_1A_I3_VO_L_1_T_120848_136734 C_0.000_Length_2072_pct_98_96;, 1A_all_VO_L_12013_T_81_153_1 C_0.203_Length_1428 type=cds; aalen=313_65%_complete; clen=1428; strand=-; offs=1287-346; evgclass=main_okay_match_1A_all_VO_L_12013_T_19_153 C_0.152_Length_867_pc…	GFZL01001001.1.p1, GFZL01013895.1.p1, GFZL01014791.1.p1, GFZL01016577.1.p1, GFZL01017067.1.p1, GFZL01019397.1.p1, GFZL01020344.1.p1, GFZL01021111.1.p1, GFZL01021184.1.p1, GFZL01021844.1.p1, GFZL01021954.1.p1, GFZL01022557.1.p1, GFZL01023041.1.p1, GFZL01023345.1.p1, GFZL01023437.1.p1, GFZL01025209.1.p1, GFZL01025378.1.p1, GFZL01025459.1.p1, GFZL01025477.1.p1, GFZL01025488.1.p1, GFZL01025708.1.p1, …	GAZW02034387.1.p1, GAZW02055250.1.p1, GAZW02055252.1.p1, GAZW02078079.1.p1, GAZW02083022.1.p1, GAZW02088612.1.p1, GAZW02088620.1.p1, GAZW02092410.1.p1, GAZW02092424.1.p1, GAZW02102527.1.p1, GAZW02102528.1.p1, GFFY01000553.1.p1, GFFY01005098.1.p1, GFFY01005934.1.p1, GFFY01006616.1.p1, GFFY01007327.1.p1, GFFY01012034.1.p1, GFFY01015188.1.p1, GFFY01015705.1.p1, GFFY01018116.1.p1, GFFY01019749.1.p1, …	Thoc_c27838_g1_i3.p1, Thoc_c27962_g1_i2.p1, Thoc_c27962_g2_i3.p1, Thoc_c28702_g1_i10.p2, Thoc_c28702_g1_i2.p1, Thoc_c28702_g1_i2.p5, Thoc_c38347_g1_i1.p1	SEGI_00020, SEGI_00044, SEGI_03013, SEGI_09213, SEGI_09621, SEGI_14400, SEGI_14886, SEGI_17511, SEGI_23748, SEGI_28123, SEGI_29431, SEGI_31547, SEGI_32805, SEGI_33847, SEGI_33991, SEGI_35522, SEGI_36470, SEGI_38367, SEGI_39466	SESE_006545, SESE_009473, SESE_026841, SESE_026982, SESE_028538, SESE_029134, SESE_031612, SESE_036253, SESE_036713, SESE_037501, SESE_038888, SESE_039896, SESE_039912, SESE_040684, SESE_041287, SESE_042256, SESE_043045, SESE_043247, SESE_057539, SESE_058303, SESE_059272, SESE_059975, SESE_061592, SESE_063427, SESE_064849, SESE_067080, SESE_067695, SESE_068444, SESE_068985, SESE_073431, SESE_0761…
OG0000023	GGJG01023258.1.p1, GGJG01024155.1.p1, GGJG01025354.1.p1, GGJG01025795.1.p1, GGJG01029323.1.p1, GGJG01031815.1.p1, GGJG01032537.1.p1, GGJG01035742.1.p1, GGJG01041478.1.p1, GGJG01043445.1.p1, GGJG01044518.1.p1	evm_27.model.AmTr_v1.0_scaffold00120.9 pacid=31574000 transcript=evm_27.model.AmTr_v1.0_scaffold00120.9 locus=evm_27.TU.AmTr_v1.0_scaffold00120.9 ID=evm_27.model.AmTr_v1.0_scaffold00120.9.v1.0 annot-version=v1.0, evm_27.model.AmTr_v1.0_scaffold00136.42 pacid=31574152 transcript=evm_27.model.AmTr_v1.0_scaffold00136.42 locus=evm_27.TU.AmTr_v1.0_scaffold00136.42 ID=evm_27.model.AmTr_v1.0_scaffold001…	GBYR01058650.1.p1, GGBW01005195.1.p4, GGBW01028978.1.p1, GGBW01042114.1.p1, GGBW01043062.1.p2, GGBW01046561.1.p1, GHLL01014718.1.p1, GHLL01068718.1.p1, GHLL01102478.1.p1, GHLL01110538.1.p1, GHLL01138952.1.p1, GHLL01176397.1.p1, GHLL01177400.1.p1, GHLL01222468.1.p2, GHLL01233598.1.p1, GHLL01265950.1.p2, GHLL01284671.1.p1, GHLL01460048.1.p1, GHLL01575077.1.p1, GHLL01600613.1.p1, GHLL01626643.1.p1, …			GCHX01047860.1.p2, GCHX01050748.1.p1, GCHX01148294.1.p1, GCHX01150773.1.p1, GCHX01151387.1.p1, GCHX01153653.1.p1, GCHX01153801.1.p1, GCHX01153978.1.p1, GCHX01248347.1.p1, GCHX01250141.1.p1, GCHX01251860.1.p2, GCHX01346582.1.p1, GCHX01351112.1.p1, GCHX01445413.1.p1, GCHX01453406.1.p1, GCZO01002096.1.p1, GCZO01107838.1.p1, GCZO01108547.1.p1, GCZO01301552.1.p2, gb|GFBZ01005119.1|.p1, gb|GFBZ01006477…	GGJJ01026047.1.p1, GGJJ01033493.1.p1, GGJJ01033648.1.p1, GGJJ01039254.1.p2, GGJJ01042122.1.p1, GGJJ01047736.1.p1, GGJJ01052729.1.p1, GGJJ01054930.1.p1, GGJJ01057001.1.p1	GDQR01002320.1.p1, GDQR01005742.1.p1, GDQR01007408.1.p1, GDQR01007617.1.p1, GDQR01008299.1.p1, GDQR01009187.1.p1, GDQR01012489.1.p1, GDQR01013744.1.p1, GDQR01015577.1.p1, GFLL01000987.1.p1, GFLL01002280.1.p2, GFLL01003516.1.p1, GFLL01032751.1.p1, GFLL01035660.1.p1, GFLL01036250.1.p1, GFLL01037847.1.p1, GFLL01046306.1.p1, GFLL01051363.1.p1, GFLL01056184.1.p1, GFLL01063806.1.p1, GFLL01064426.1.p1, …	GGJH01013854.1.p2, GGJH01017649.1.p1, GGJH01020405.1.p1, GGJH01023123.1.p1, GGJH01026782.1.p1, GGJH01032622.1.p1, GGJH01040344.1.p1, GGJH01046633.1.p1	HAMI01007761.1.p2, HAMI01008493.1.p2, HAMI01010316.1.p1, HAMI01016226.1.p3, HAMI01025126.1.p1, HAMI01032250.1.p1, HAMI01036856.1.p1, HAMI01037060.1.p1	GBLJ01001366.1.p1, GBLJ01003860.1.p1, GBLJ01006281.1.p1, GBLJ01006484.1.p1, GBLJ01008206.1.p1, GBLJ01010493.1.p1, GBLJ01012496.1.p1, GBLJ01020549.1.p1, GBLJ01021662.1.p1, GBLJ01024935.1.p1, GBLJ01027596.1.p1, GBLJ01029303.1.p1, GBLJ01032172.1.p1, GBLJ01035107.1.p1, GBLJ01035351.1.p1, GBLJ01037601.1.p1, GBLJ01037975.1.p1, GBLJ01038740.1.p1, GBLJ01046978.1.p1	PILA_06393, PILA_17938, PILA_19537, PILA_24286, PILA_29088, gb|GEUZ01020884.1|.p1	GAQR01013399.1.p1, GAQR01035378.1.p1, GFHB01001304.1.p1, GFHB01008484.1.p1, GFHB01018335.1.p1, GFHB01018939.1.p1, GFHB01030433.1.p1, GFHB01035347.1.p1, GFHB01057270.1.p1, GFHB01068090.1.p1, GFHB01068794.1.p1, GFHB01078104.1.p1, GFHB01080059.1.p1, GFHB01082028.1.p1, GFHB01090748.1.p1, GFHB01095860.1.p1, GFHB01111119.1.p1, GFHB01111507.1.p1, GFHB01116428.1.p1, GFHB01121266.1.p1, GFHB01121555.1.p1, …	GBQX01024993.1.p1, GBQX01032335.1.p1, GBQX01035319.1.p1, GBQX01045086.1.p1, GBQX01045969.1.p1, GBQX01047986.1.p1, GBQX01051249.1.p2, GDQD01007059.1.p1	GECO01000061.1.p1, GECO01000117.1.p1, GECO01001322.1.p1, GECO01001782.1.p1, GECO01002067.1.p1, GECO01003765.1.p1, GECO01005002.1.p1, GECO01005875.1.p1, GECO01005993.1.p2, GECO01007506.1.p1, GECO01009240.1.p1, GECO01009654.1.p1, GECO01010021.1.p1, GECO01011673.1.p1, GECO01011907.1.p1, GECO01012253.1.p1, GECO01012309.1.p1, GECO01012528.1.p1, GECO01012602.1.p1, GECO01012841.1.p1, GECO01012984.1.p1, …	GGJK01022650.1.p1, GGJK01024804.1.p1, GGJK01027400.1.p1, GGJK01028799.1.p1, GGJK01029160.1.p1, GGJK01029363.1.p1, GGJK01037774.1.p1, GGJK01042723.1.p1	1A_I11_NT_comp48468_c0_seq4_1 type=cds; aalen=183_46%_complete-utrpoor; clen=1188; strand=-; offs=663-112; evgclass=main_okay_match_5A_all_VO_L_126590_T_1_3 C_0.429_Length_742_pct_100_79;, 1A_I11_VO_L_6503_T_4_12_1 C_0.467_Length_947 type=cds; aalen=250_79%_complete; clen=947; strand=-; offs=932-180; evgclass=maina2_okay_match_1A_I11_VO_L_6503_T_10_12 C_0.333_Length_864_pct_99_100;, 1A_I3_VO_L_1_…	GFZL01002218.1.p1, GFZL01002305.1.p1, GFZL01003709.1.p1, GFZL01006361.1.p1, GFZL01007492.1.p1, GFZL01010575.1.p1, GFZL01012956.1.p1, GFZL01013638.1.p1, GFZL01014332.1.p1, GFZL01015266.1.p1, GFZL01016488.1.p1, GFZL01016574.1.p1, GFZL01016828.1.p1, GFZL01017048.1.p1, GFZL01018016.1.p1, GFZL01019009.1.p1, GFZL01019214.1.p1, GFZL01019380.1.p1, GFZL01019488.1.p1, GFZL01019565.1.p1, GFZL01019722.1.p1, …	GAZW02000222.1.p1, GAZW02000369.1.p1, GAZW02001906.1.p1, GAZW02002212.1.p1, GAZW02002237.1.p1, GAZW02002261.1.p1, GAZW02002527.1.p1, GAZW02003563.1.p1, GAZW02003950.1.p1, GAZW02004362.1.p1, GAZW02004740.1.p1, GAZW02005593.1.p1, GAZW02005962.1.p1, GAZW02007477.1.p2, GAZW02008689.1.p2, GAZW02008948.1.p1, GAZW02009297.1.p1, GAZW02009775.1.p1, GAZW02010711.1.p1, GAZW02010742.1.p1, GAZW02010796.1.p1, …	Thoc_c25001_g1_i1.p2	SEGI_01602, SEGI_18926	SESE_067495, SESE_068429, SESE_073143, SESE_076915, SESE_079700, SESE_082283, SESE_086512, SESE_094869, SESE_095823, SESE_100375, SESE_105363, SESE_113953, SESE_116466, SESE_121562, SESE_123135, SESE_126018, SESE_128393, SESE_129115, SESE_130759, SESE_133491, SESE_134030, SESE_134128, SESE_134659, SESE_134917, SESE_137674, SESE_138992, SESE_139219, SESE_139956, SESE_140050, SESE_140684, SESE_1415…
OG0000024	GGJG01001881.1.p1, GGJG01002034.1.p1, GGJG01002035.1.p1, GGJG01002222.1.p1, GGJG01004076.1.p1, GGJG01021303.1.p1, GGJG01021926.1.p1, GGJG01023598.1.p1, GGJG01023822.1.p1, GGJG01025808.1.p1, GGJG01026161.1.p1, GGJG01026364.1.p1, GGJG01026399.1.p1, GGJG01026700.1.p1, GGJG01026898.1.p1, GGJG01026968.1.p1, GGJG01027089.1.p1, GGJG01027988.1.p1, GGJG01028262.1.p1, GGJG01028456.1.p1, GGJG01028634.1.p1, …		GBYR01034047.1.p1, GGBW01000503.1.p1, GGBW01000504.1.p1, GGBW01000508.1.p1, GGBW01000513.1.p1, GGBW01000524.1.p1, GGBW01039549.1.p1, GHLL01213031.1.p1, GHLL01213035.1.p1, GHLL01269041.1.p1, Gb_22490, Gb_39914	TnS000056807t03, TnS000172305t03, TnS000172305t08, TnS000397867t01, TnS000531675t01, TnS000564519t01, TnS000578729t04, TnS000631917t09, TnS000636587t02, TnS000688485t04, TnS000719921t01, TnS000731265t03, TnS000742425t01, TnS000798949t01, TnS000799047t02, TnS000876051t02, TnS000913713t02, TnS000954725t01, TnS013827822t01	Megl_c15742_g1_i2.p1, Megl_c26283_g4_i1.p1, Megl_c26909_g1_i1.p1, Megl_c26909_g2_i1.p1, Megl_c28087_g1_i4.p1, Megl_c28581_g1_i1.p1, Megl_c8402_g1_i1.p1	GCHX01050038.1.p1, GCHX01153394.1.p1, GCHX01252712.1.p1, GCHX01445935.1.p1, GCZO01201406.1.p1, GCZO01300575.1.p1, GCZO01309558.1.p1, GCZO01309593.1.p1, gb|GFBZ01011874.1|.p1, gb|GFBZ01017581.1|.p1, gi|830827792|gb|GCZO01348345.1|.p1, gi|830854932|gb|GCZO01321211.1|.p1, gi|830883701|gb|GCZO01296471.1|.p1, gi|830893580|gb|GCZO01286593.1|.p1, gi|830903586|gb|GCZO01276588.1|.p1, gi|830906629|gb|GCZO0…	GGJJ01000628.1.p1, GGJJ01000706.1.p1, GGJJ01001811.1.p1, GGJJ01002092.1.p1, GGJJ01002294.1.p1, GGJJ01002791.1.p1, GGJJ01004668.1.p1, GGJJ01021456.1.p1, GGJJ01025673.1.p1, GGJJ01026685.1.p1, GGJJ01028727.1.p1, GGJJ01029168.1.p1, GGJJ01030790.1.p1, GGJJ01032000.1.p1, GGJJ01034520.1.p1, GGJJ01036821.1.p1, GGJJ01038958.1.p1, GGJJ01045374.1.p1, GGJJ01046416.1.p1, GGJJ01052369.1.p1, GGJJ01052555.1.p1	GDQR01000697.1.p1, GDQR01009013.1.p1, GFLL01049879.1.p1, GFLL01051866.1.p1, GFLL01061058.1.p1, GFLL01066380.1.p1, GFLL01074831.1.p1, GFLL01081103.1.p1, GFLL01086197.1.p1, GFLL01086200.1.p1, GFLL01100122.1.p1, GFLL01108117.1.p1, GFLL01117027.1.p1, GFLL01117031.1.p1, GFLL01121541.1.p1, GFLL01135996.1.p1, GFLL01138421.1.p1, GFLL01138424.1.p1, GFLL01141104.1.p1, GFLL01141109.1.p1, GFLL01141117.1.p1, …	GGJH01000767.1.p1, GGJH01000768.1.p1, GGJH01007771.1.p1, GGJH01007772.1.p1, GGJH01010161.1.p1, GGJH01016954.1.p1, GGJH01018316.1.p1, GGJH01019750.1.p1, GGJH01020431.1.p1, GGJH01021427.1.p1, GGJH01021710.1.p1, GGJH01021755.1.p1, GGJH01023984.1.p1, GGJH01024043.1.p1, GGJH01024330.1.p1, GGJH01024817.1.p1, GGJH01025977.1.p1, GGJH01026169.1.p1, GGJH01027669.1.p1, GGJH01028434.1.p1, GGJH01028556.1.p1, …	HAMI01000355.1.p1, HAMI01001920.1.p1, HAMI01004733.1.p1, HAMI01006718.1.p1, HAMI01014973.1.p1, HAMI01015345.1.p1, HAMI01021030.1.p1, HAMI01021758.1.p1, HAMI01023094.1.p1, HAMI01027100.1.p1, HAMI01032199.1.p1, HAMI01034557.1.p1, HAMI01034815.1.p1, HAMI01035208.1.p1	GBLJ01001308.1.p1, GBLJ01001386.1.p1, GBLJ01005115.1.p1, GBLJ01007949.1.p1, GBLJ01008283.1.p1, GBLJ01011164.1.p1, GBLJ01013228.1.p1, GBLJ01015312.1.p1, GBLJ01016120.1.p1, GBLJ01018486.1.p1, GBLJ01019538.1.p1, GBLJ01020791.1.p1, GBLJ01023563.1.p1, GBLJ01024589.1.p1, GBLJ01026865.1.p1, GBLJ01032592.1.p1, gb|GESU01006364.1|.p1, gb|GESU01034765.1|.p1, gb|GESU01039712.1|.p1, gb|GESU01041400.1|.p1, gb|…	PILA_00529, PILA_00709, PILA_03428, PILA_05048, PILA_06590, PILA_09801, PILA_10600, PILA_18789, PILA_18790, PILA_22962, PILA_23879, PILA_30955, PILA_37618, gb|GEUZ01001506.1|.p1, gb|GEUZ01003975.1|.p1, gb|GEUZ01005750.1|.p1, gb|GEUZ01007434.1|.p1, gb|GEUZ01008525.1|.p1, gb|GEUZ01015355.1|.p1, gb|GEUZ01015483.1|.p1, gb|GEUZ01016084.1|.p1, gb|GEUZ01016883.1|.p1, gb|GEUZ01018482.1|.p1, gb|GEUZ010186…	GAQR01006693.1.p1, GAQR01044630.1.p1, GAQR01044631.1.p1, GAQR01061518.1.p1, GAQR01066857.1.p1, GFHB01008680.1.p1, GFHB01018920.1.p1, GFHB01046308.1.p1, GFHB01047682.1.p1, GFHB01057586.1.p1, GFHB01057897.1.p1, GFHB01059724.1.p1, GFHB01060467.1.p1, GFHB01067488.1.p1, GFHB01110587.1.p1, GFHB01111395.1.p1, GFHB01114840.1.p1, GFHB01152043.1.p1, GFHB01156688.1.p1, GFHB01170759.1.p1, GFHB01184436.1.p1, …	GBQX01016089.1.p1, GBQX01020231.1.p1, GBQX01033893.1.p1, GBQX01038307.1.p1, GBQX01040374.1.p1, GBQX01041535.1.p1, GBQX01043235.1.p1, GBQX01052734.1.p1, GDQD01001502.1.p1, GDQD01004391.1.p1	GECO01001237.1.p1, GECO01003787.1.p1, GECO01003878.1.p1, GECO01004441.1.p1, GECO01009039.1.p1, GECO01009040.1.p1, GECO01010805.1.p1, GECO01010806.1.p1, GECO01012894.1.p1, GECO01013399.1.p1, GECO01013527.1.p1, GECO01017833.1.p1, GECO01018988.1.p1, GECO01021131.1.p1, GECO01021136.1.p1, GECO01021456.1.p1, GECO01021940.1.p1, GECO01023502.1.p1, GECO01023884.1.p1, GECO01026081.1.p1, GECO01026212.1.p1, …	GGJK01007457.1.p1, GGJK01010397.1.p1, GGJK01015287.1.p1, GGJK01016192.1.p1, GGJK01019738.1.p1, GGJK01021334.1.p1, GGJK01021635.1.p1, GGJK01023218.1.p1, GGJK01024222.1.p1, GGJK01024725.1.p1, GGJK01030555.1.p1, GGJK01032062.1.p1, GGJK01041211.1.p1, GGJK01042327.1.p1, GGJK01043127.1.p1, GGJK01044110.1.p1	1A_I11_VO_L_1_T_148584_226447_1 C_0.000_Length_1801 type=cds; aalen=245_40%_complete-utrbad; clen=1801; strand=-; offs=845-108; evgclass=main_okay_match_1A_I9_VO_L_1_T_5498_116761 C_0.000_Length_427_pct_99_92;, 1A_I11_VO_L_1_T_188909_226447_1 C_0.000_Length_889 type=cds; aalen=265_89%_complete; clen=889; strand=-; offs=841-44; evgclass=main_okay_match_1A_I11_VO_L_1_T_188911_226447 C_0.000_Length_…	GFZL01000461.1.p1, GFZL01001072.1.p1, GFZL01002519.1.p1, GFZL01016467.1.p1, GFZL01020075.1.p1, GFZL01020109.1.p1, GFZL01020905.1.p1, GFZL01020957.1.p1, GFZL01021113.1.p1, GFZL01021165.1.p1, GFZL01021830.1.p1, GFZL01024209.1.p1, GFZL01026310.1.p1, GFZL01026460.1.p1, GFZL01026475.1.p1, GFZL01026834.1.p1, GFZL01026898.1.p1, GFZL01027284.1.p1, GFZL01027670.1.p1, GFZL01028606.1.p1	GAZW02015808.1.p1, GAZW02041875.1.p1, GAZW02051354.1.p1, GAZW02064073.1.p1, GAZW02067495.1.p1, GAZW02078136.1.p1, GAZW02093195.1.p1, GAZW02093367.1.p1, GAZW02098696.1.p1, GAZW02102297.1.p1, GFFY01000247.1.p1, GFFY01000381.1.p1, GFFY01000527.1.p1, GFFY01000583.1.p1, GFFY01000649.1.p1, GFFY01000775.1.p2, GFFY01000923.1.p1, GFFY01000926.1.p1, GFFY01001024.1.p1, GFFY01001149.1.p1, GFFY01001183.1.p1, …	Thoc_c27988_g1_i1.p1, Thoc_c27988_g1_i4.p1, Thoc_c37619_g1_i1.p1, Thoc_c39936_g1_i1.p1	SEGI_05277, SEGI_05740, SEGI_07651, SEGI_13376, SEGI_14946, SEGI_19626, SEGI_22225, SEGI_29066, SEGI_32558, SEGI_34984, SEGI_35717, SEGI_36669	SESE_000147, SESE_004670, SESE_057625, SESE_059270, SESE_060647, SESE_062242, SESE_062851, SESE_063431, SESE_065303, SESE_066483, SESE_073604, SESE_074411, SESE_075751, SESE_076695, SESE_082068, SESE_082311, SESE_082802, SESE_082847, SESE_083014, SESE_084582, SESE_084638, SESE_086411, SESE_088152, SESE_089827, SESE_094680, SESE_094852, SESE_095060, SESE_096530, SESE_098251, SESE_100353, SESE_1044…
OG0000025	GGJG01001692.1.p1, GGJG01002001.1.p1, GGJG01002078.1.p1, GGJG01002079.1.p1, GGJG01002417.1.p1, GGJG01005254.1.p1, GGJG01009565.1.p1, GGJG01015461.1.p1, GGJG01015582.1.p1, GGJG01016702.1.p1, GGJG01018436.1.p1, GGJG01019815.1.p1, GGJG01023845.1.p1, GGJG01024066.1.p1, GGJG01027417.1.p1, GGJG01037086.1.p1, GGJG01040268.1.p1, GGJG01042769.1.p1	evm_27.model.AmTr_v1.0_scaffold00001.502 pacid=31550944 transcript=evm_27.model.AmTr_v1.0_scaffold00001.502 locus=evm_27.TU.AmTr_v1.0_scaffold00001.502 ID=evm_27.model.AmTr_v1.0_scaffold00001.502.v1.0 annot-version=v1.0, evm_27.model.AmTr_v1.0_scaffold00001.505 pacid=31551133 transcript=evm_27.model.AmTr_v1.0_scaffold00001.505 locus=evm_27.TU.AmTr_v1.0_scaffold00001.505 ID=evm_27.model.AmTr_v1.0_…	GBYR01010885.1.p1, GBYR01022429.1.p1, GBYR01023928.1.p2, GBYR01023929.1.p1, GBYR01035809.1.p1, GBYR01035812.1.p1, GGBW01006135.1.p1, GGBW01016139.1.p2, GGBW01016140.1.p1, GGBW01026556.1.p1, GHLL01237370.1.p1, GHLL01260457.1.p1, Gb_00278, Gb_17232, Gb_33332	TnS000812511t02, TnS000853469t01, TnS000910651t02, TnS013906946t02	Megl_c11594_g1_i2.p1, Megl_c12792_g1_i1.p1, Megl_c12792_g1_i2.p1, Megl_c23926_g1_i1.p1, Megl_c26166_g1_i2.p1, Megl_c26166_g3_i3.p1	GCHX01047218.1.p1, GCZO01206087.1.p1, GCZO01300104.1.p1, GCZO01309361.1.p1, gb|GFBZ01000191.1|.p1, gi|830842870|gb|GCZO01333271.1|.p1, gi|830888919|gb|GCZO01291254.1|.p1, gi|830916239|gb|GCZO01263935.1|.p1, gi|830958149|gb|GCZO01222026.1|.p1, gi|830989754|gb|GCZO01190427.1|.p1, gi|831066823|gb|GCZO01113624.1|.p1, gi|831094586|gb|GCZO01085872.1|.p1, gi|831101031|gb|GCZO01079428.1|.p1	GGJJ01001095.1.p1, GGJJ01002138.1.p1, GGJJ01002333.1.p1, GGJJ01002473.1.p1, GGJJ01005446.1.p1, GGJJ01015759.1.p1, GGJJ01033673.1.p2, GGJJ01034346.1.p1, GGJJ01042786.1.p1, GGJJ01043345.1.p1, GGJJ01048488.1.p1, GGJJ01054159.1.p1	GDQR01012434.1.p1, GDQR01013303.1.p1, GFLL01005850.1.p1, GFLL01040983.1.p1, GFLL01073671.1.p1, GFLL01073672.1.p2, GFLL01100006.1.p1, GFLL01114715.1.p1, GFLL01121293.1.p1, GFLL01121294.1.p1, gb|GFBO01035577.1|.p1, gb|GFBO01076071.1|.p1	GGJH01010153.1.p1, GGJH01010207.1.p1, GGJH01010491.1.p1, GGJH01012166.1.p1, GGJH01012167.1.p1, GGJH01013414.1.p1, GGJH01014298.1.p1, GGJH01015728.1.p1, GGJH01017179.1.p1, GGJH01018103.1.p1, GGJH01027117.1.p1, GGJH01029434.1.p1, GGJH01030213.1.p1, GGJH01032401.1.p1, GGJH01032988.1.p1, GGJH01041298.1.p1	HAMI01000867.1.p1, HAMI01001158.1.p1, HAMI01001549.1.p1, HAMI01002746.1.p1, HAMI01008905.1.p1, HAMI01015600.1.p1, HAMI01016414.1.p1, HAMI01018885.1.p1, HAMI01020263.1.p1, HAMI01022264.1.p1, HAMI01022848.1.p1, HAMI01025448.1.p1, HAMI01028095.1.p1, HAMI01028557.1.p1, HAMI01028644.1.p1, HAMI01031226.1.p1	GBLJ01000987.1.p1, GBLJ01004298.1.p1, GBLJ01008027.1.p1, GBLJ01017736.1.p1, GBLJ01030335.1.p1, GBLJ01036128.1.p1, GBLJ01043636.1.p1, gb|GESU01007891.1|.p1, gb|GESU01008864.1|.p1, gb|GESU01012879.1|.p1, gb|GESU01024312.1|.p1, gb|GESU01044799.1|.p1	PILA_00568, PILA_01853, PILA_02308, PILA_02553, PILA_03143, PILA_05720, PILA_06456, PILA_07559, PILA_08946, PILA_10677, PILA_11662, PILA_12410, PILA_14510, PILA_16847, PILA_23555, PILA_23670, PILA_24241, PILA_25906, PILA_25907, PILA_26243, PILA_26387, PILA_27294, PILA_28569, PILA_29025, PILA_30890, PILA_32005, PILA_32551, PILA_33059, PILA_33200, PILA_36047, PILA_36048, PILA_37008, gb|GEUZ01010949…	GAQR01012248.1.p1, GAQR01018935.1.p1, GAQR01028719.1.p1, GAQR01030623.1.p1, GAQR01038607.1.p1, GAQR01038608.1.p1, GAQR01038613.1.p1, GAQR01039616.1.p1, GAQR01057179.1.p1, GFHB01019309.1.p1, GFHB01050766.1.p1, GFHB01075859.1.p1, GFHB01101401.1.p1, GFHB01157456.1.p1, GFHB01182898.1.p1, GFHB01186803.1.p1	GBQX01041787.1.p1, GBQX01043280.1.p1	GECO01009845.1.p1, GECO01009848.1.p1, GECO01012201.1.p1, GECO01014704.1.p1, GECO01017080.1.p1, GECO01019879.1.p1, GECO01024258.1.p1, GECO01025208.1.p1, GECO01028292.1.p1, GECO01029140.1.p1, GECO01032438.1.p1, GECO01033035.1.p1, GECO01034143.1.p1, GECO01034236.1.p1, GECO01038282.1.p1, GECO01038803.1.p1, GECO01040815.1.p1, GECO01042635.1.p1, GECO01043097.1.p1, GECO01050000.1.p1, GECO01050091.1.p1, …	GGJK01009406.1.p1, GGJK01009876.1.p1, GGJK01010881.1.p1, GGJK01013971.1.p1, GGJK01015110.1.p1, GGJK01016203.1.p1, GGJK01018477.1.p1, GGJK01020296.1.p1, GGJK01020890.1.p1, GGJK01022363.1.p1, GGJK01024886.1.p1, GGJK01025973.1.p1, GGJK01032429.1.p1, GGJK01033925.1.p1, GGJK01035709.1.p1, GGJK01039952.1.p1, GGJK01040906.1.p1, GGJK01041414.1.p1, GGJK01042243.1.p1, GGJK01042762.1.p1	1A_I11_VO_L_1_T_165932_226447_1 C_0.000_Length_1004 type=cds; aalen=284_85%_complete; clen=1004; strand=+; offs=76-930; evgclass=main_okay_match_1A_I11_VO_L_1_T_165931_226447 C_0.000_Length_920_pct_100_100;, 1A_I11_VO_L_1_T_219437_226447_1 C_0.000_Length_1521 type=cds; aalen=323_63%_complete; clen=1521; strand=-; offs=1163-192; evgclass=main_okay_match_1A_I11_VO_L_1_T_219438_226447 C_0.000_Length…	GFZL01001327.1.p1, GFZL01002506.1.p1, GFZL01006118.1.p1, GFZL01006953.1.p1, GFZL01007165.1.p1, GFZL01009671.1.p1, GFZL01018674.1.p1, GFZL01020361.1.p1, GFZL01020415.1.p1, GFZL01020719.1.p1, GFZL01021825.1.p1, GFZL01021826.1.p1, GFZL01022950.1.p1, GFZL01023150.1.p1, GFZL01023601.1.p1, GFZL01024256.1.p1, GFZL01027692.1.p1	GAZW02042520.1.p1, GAZW02053819.1.p1, GAZW02053828.1.p1, GAZW02054223.1.p1, GAZW02054226.1.p1, GAZW02059273.1.p1, GAZW02059274.1.p1, GAZW02059278.1.p1, GAZW02064165.1.p1, GAZW02064170.1.p1, GAZW02064187.1.p1, GAZW02075073.1.p1, GFFY01013473.1.p1, GFFY01015036.1.p1, GFFY01023661.1.p1, GFFY01023701.1.p1, GFFY01026468.1.p2, GFFY01041770.1.p1, GFFY01044591.1.p1, GFFY01052135.1.p1, GFFY01079951.1.p1, …	Thoc_c18403_g1_i1.p1, Thoc_c28622_g3_i12.p1, Thoc_c28622_g4_i3.p1, Thoc_c4348_g1_i1.p1	SEGI_01040, SEGI_01958, SEGI_01995, SEGI_02100, SEGI_02106, SEGI_02245, SEGI_03643, SEGI_08297, SEGI_08615, SEGI_08622, SEGI_11177, SEGI_12012, SEGI_12615, SEGI_15243, SEGI_15603, SEGI_17632, SEGI_17886, SEGI_18970, SEGI_19404, SEGI_22658, SEGI_26248, SEGI_26315, SEGI_28518, SEGI_29857, SEGI_31081, SEGI_31114, SEGI_33238, SEGI_33691, SEGI_36737, SEGI_36992, SEGI_38449, SEGI_39318, SEGI_40418, SEG…	SESE_003684, SESE_017039, SESE_017208, SESE_024016, SESE_029490, SESE_029953, SESE_031871, SESE_033886, SESE_036530, SESE_040129, SESE_056035, SESE_056997, SESE_058400, SESE_058802, SESE_059149, SESE_059748, SESE_060293, SESE_060428, SESE_060489, SESE_060640, SESE_063763, SESE_064527, SESE_065245, SESE_065543, SESE_068896, SESE_069202, SESE_069243, SESE_069425, SESE_069593, SESE_070516, SESE_0706…
OG0000026	GGJG01003858.1.p1, GGJG01012031.1.p1, GGJG01019844.1.p1, GGJG01028595.1.p1, GGJG01031678.1.p1, GGJG01031867.1.p1, GGJG01031902.1.p1, GGJG01033339.1.p1, GGJG01035237.1.p1, GGJG01036417.1.p1, GGJG01036917.1.p1, GGJG01043735.1.p1	evm_27.model.AmTr_v1.0_scaffold00120.20 pacid=31574004 transcript=evm_27.model.AmTr_v1.0_scaffold00120.20 locus=evm_27.TU.AmTr_v1.0_scaffold00120.20 ID=evm_27.model.AmTr_v1.0_scaffold00120.20.v1.0 annot-version=v1.0	GHLL01279470.1.p1, GHLL01279471.1.p1, Gb_03419, Gb_04197	TnS000011401t02, TnS000022443t08, TnS000033869t01, TnS000190931t01, TnS000199843t06, TnS000332527t11, TnS000423769t02, TnS000516007t02, TnS000572861t02, TnS000586363t09, TnS000600351t04, TnS000690795t02, TnS000747227t01, TnS000841607t01, TnS000885807t01, TnS000971537t01, TnS013895628t01	Megl_c20124_g1_i3.p1, Megl_c3572_g1_i1.p1	GCHX01051306.1.p1, GCHX01054679.1.p1, GCHX01253813.1.p1, GCHX01347376.1.p1, GCHX01348070.1.p1, GCHX01351646.1.p1, GCHX01351827.1.p1, GCZO01007478.1.p1, GCZO01106485.1.p1, GCZO01201647.1.p1, GCZO01300429.1.p1, GCZO01300553.1.p1, gb|GFBZ01019286.1|.p1, gi|830827043|gb|GCZO01349094.1|.p1, gi|830827224|gb|GCZO01348913.1|.p1, gi|830837774|gb|GCZO01338365.1|.p1, gi|830851798|gb|GCZO01324345.1|.p1, gi|8…	GGJJ01009227.1.p1, GGJJ01012277.1.p1, GGJJ01020201.1.p1, GGJJ01022418.1.p1, GGJJ01024852.1.p1, GGJJ01025542.1.p1, GGJJ01027891.1.p1, GGJJ01028631.1.p1, GGJJ01030276.1.p1, GGJJ01034429.1.p1, GGJJ01036042.1.p1, GGJJ01037184.1.p1, GGJJ01039527.1.p1, GGJJ01039737.1.p1, GGJJ01042250.1.p1, GGJJ01043134.1.p1, GGJJ01045548.1.p1, GGJJ01046469.1.p1, GGJJ01048454.1.p1, GGJJ01049528.1.p1, GGJJ01051430.1.p1, …	GDQR01001449.1.p1, GDQR01003709.1.p1, GDQR01009424.1.p1, GDQR01014212.1.p1, GDQR01016071.1.p1, GDQR01017746.1.p1, GFLL01003562.1.p1, GFLL01033388.1.p1, GFLL01039436.1.p1, GFLL01054638.1.p1, GFLL01056465.1.p1, GFLL01057876.1.p1, GFLL01073525.1.p1, GFLL01114028.1.p1, GFLL01117274.1.p1, GFLL01117277.1.p1, GFLL01121349.1.p1, GFLL01125627.1.p1, GFLL01128166.1.p1, GFLL01128170.1.p1, GFLL01128584.1.p1, …	GGJH01003672.1.p1, GGJH01011798.1.p1, GGJH01014407.1.p1, GGJH01018979.1.p1, GGJH01026033.1.p1, GGJH01030496.1.p1, GGJH01031746.1.p1, GGJH01032852.1.p1, GGJH01035243.1.p1, GGJH01035804.1.p1, GGJH01040154.1.p1, GGJH01041404.1.p1, GGJH01044054.1.p1, GGJH01044230.1.p1, GGJH01046035.1.p1, GGJH01046808.1.p1	HAMI01005712.1.p1, HAMI01007956.1.p1, HAMI01008310.1.p1, HAMI01011881.1.p1, HAMI01011902.1.p1, HAMI01013416.1.p1, HAMI01017934.1.p1, HAMI01019447.1.p1, HAMI01019709.1.p1, HAMI01020131.1.p1, HAMI01023633.1.p2, HAMI01031245.1.p1, HAMI01032645.1.p1, HAMI01032843.1.p1, HAMI01033542.1.p1, HAMI01034026.1.p1	GBLJ01002789.1.p1, GBLJ01006299.1.p1, GBLJ01009078.1.p1, GBLJ01010907.1.p2, GBLJ01014607.1.p1, GBLJ01034699.1.p1, GBLJ01041427.1.p1, gb|GESU01002784.1|.p1, gb|GESU01015357.1|.p1, gb|GESU01017348.1|.p1, gb|GESU01017351.1|.p1, gb|GESU01019584.1|.p1, gb|GESU01034938.1|.p1, gb|GESU01039369.1|.p1	PILA_00823, PILA_02865, PILA_03937, PILA_05444, PILA_05891, PILA_06419, PILA_07212, PILA_09820, PILA_09962, PILA_11187, PILA_12264, PILA_13188, PILA_13765, PILA_16318, PILA_16390, PILA_19500, PILA_20211, PILA_22009, PILA_27648, PILA_27773, PILA_28257, PILA_28287, PILA_30049, PILA_31303, PILA_32008, PILA_34398, PILA_34608, PILA_35820, PILA_36634, PILA_36908, PILA_36909, PILA_36910, PILA_37193, PIL…	GAQR01003402.1.p1, GAQR01010622.1.p1, GAQR01011535.1.p1, GAQR01014902.1.p1, GAQR01015645.1.p1, GAQR01019464.1.p1, GAQR01019465.1.p1, GAQR01020467.1.p1, GAQR01022701.1.p1, GAQR01023208.1.p1, GAQR01024566.1.p1, GAQR01029751.1.p1, GAQR01032978.1.p1, GAQR01034115.1.p1, GAQR01034117.1.p1, GAQR01034384.1.p2, GAQR01036584.1.p1, GAQR01040514.1.p1, GAQR01043006.1.p1, GAQR01044231.1.p1, GAQR01045670.1.p1, …	GBQX01020564.1.p1, GBQX01027056.1.p1, GBQX01031961.1.p1, GBQX01051472.1.p1, GBQX01052410.1.p1	GECO01004348.1.p1, GECO01010342.1.p1, GECO01010961.1.p1, GECO01011142.1.p1, GECO01011143.1.p1, GECO01011144.1.p1, GECO01011157.1.p1, GECO01011570.1.p1, GECO01012160.1.p1, GECO01013306.1.p1, GECO01018074.1.p1, GECO01018460.1.p1, GECO01018934.1.p1, GECO01020482.1.p1, GECO01021481.1.p2, GECO01023013.1.p1, GECO01024936.1.p1, GECO01026712.1.p1, GECO01032822.1.p1, GECO01033841.1.p1, GECO01035689.1.p1, …	GGJK01020870.1.p1, GGJK01021482.1.p1, GGJK01024293.1.p1, GGJK01024632.1.p1, GGJK01026933.1.p1, GGJK01027505.1.p1, GGJK01027975.1.p1, GGJK01030531.1.p1, GGJK01031874.1.p1, GGJK01032015.1.p1, GGJK01034225.1.p1, GGJK01034359.1.p1, GGJK01034905.1.p1, GGJK01035080.1.p1, GGJK01036380.1.p1, GGJK01040472.1.p1, GGJK01040692.1.p1, GGJK01043381.1.p1, GGJK01045264.1.p1	1A_I11_VO_L_1_T_68306_226447_1 C_0.000_Length_946 type=cds; aalen=300_95%_complete; clen=946; strand=+; offs=14-916; evgclass=main_okay_match_1A_I11_VO_L_1_T_68307_226447 C_0.000_Length_923_pct_99_99;, 1A_I3_VO_L_1_T_126882_136734_1 C_0.000_Length_2412 type=cds; aalen=787_98%_complete; clen=2412; strand=+; offs=2-2365; evgclass=main_okay_match_1A_I3_VO_L_1_T_126881_136734 C_0.000_Length_2313_pct_…	GFZL01001022.1.p1, GFZL01008824.1.p1, GFZL01013083.1.p1, GFZL01015370.1.p1, GFZL01019044.1.p1, GFZL01019769.1.p1, GFZL01019808.1.p1, GFZL01019845.1.p1, GFZL01019975.1.p1, GFZL01019981.1.p1, GFZL01020139.1.p1, GFZL01020148.1.p1, GFZL01020164.1.p1, GFZL01020267.1.p1, GFZL01020468.1.p1, GFZL01020928.1.p1, GFZL01020943.1.p1, GFZL01023069.1.p1, GFZL01023114.1.p1, GFZL01023314.1.p1, GFZL01024582.1.p1, …	GAZW02019677.1.p1, GAZW02022290.1.p1, GAZW02023766.1.p1, GAZW02040658.1.p1, GAZW02046247.1.p1, GAZW02050000.1.p1, GAZW02055534.1.p1, GAZW02070258.1.p1, GAZW02070265.1.p1, GAZW02070267.1.p1, GAZW02078152.1.p1, GAZW02084862.1.p1, GAZW02090260.1.p1, GAZW02101181.1.p1, GFFY01007798.1.p1, GFFY01010834.1.p1, GFFY01011725.1.p1, GFFY01013231.1.p1, GFFY01016036.1.p1, GFFY01023733.1.p1, GFFY01024542.1.p1, …	Thoc_c29901_g1_i1.p1	SEGI_01196, SEGI_15559, SEGI_21328, SEGI_24097, SEGI_25535, SEGI_27233, SEGI_32052, SEGI_38170	SESE_028703, SESE_036403, SESE_039265, SESE_045460, SESE_046329, SESE_047562, SESE_050263, SESE_064818, SESE_067488, SESE_084405, SESE_091205, SESE_094759, SESE_095885, SESE_116463, SESE_124204, SESE_124370, SESE_126930, SESE_127316, SESE_131050, SESE_131528, SESE_131752, SESE_132006, SESE_132089, SESE_132690, SESE_133690, SESE_137525, SESE_138186, SESE_138349, SESE_139130, SESE_144300, SESE_1478…
OG0000027	GGJG01001353.1.p1, GGJG01005277.1.p1, GGJG01005585.1.p1, GGJG01008333.1.p1, GGJG01016148.1.p1, GGJG01021673.1.p1, GGJG01025271.1.p1, GGJG01025725.1.p1, GGJG01026533.1.p1, GGJG01034150.1.p1, GGJG01043513.1.p1	evm_27.model.AmTr_v1.0_scaffold00009.363 pacid=31568725 transcript=evm_27.model.AmTr_v1.0_scaffold00009.363 locus=evm_27.TU.AmTr_v1.0_scaffold00009.363 ID=evm_27.model.AmTr_v1.0_scaffold00009.363.v1.0 annot-version=v1.0, evm_27.model.AmTr_v1.0_scaffold00029.278 pacid=31549944 transcript=evm_27.model.AmTr_v1.0_scaffold00029.278 locus=evm_27.TU.AmTr_v1.0_scaffold00029.278 ID=evm_27.model.AmTr_v1.0_…	GBYR01003094.1.p1, GBYR01007621.1.p1, GBYR01039908.1.p1, GBYR01042666.1.p1, GGBW01017464.1.p1, GGBW01024535.1.p1, GGBW01025008.1.p1, GGBW01029257.1.p1, GGBW01032699.1.p1, GGBW01043471.1.p1, GGBW01051274.1.p1, GGBW01054908.1.p1, GHLL01002853.1.p1, GHLL01034481.1.p1, GHLL01056079.1.p1, GHLL01060878.1.p1, GHLL01078406.1.p1, GHLL01079608.1.p1, GHLL01093398.1.p2, GHLL01112953.1.p1, GHLL01115868.1.p1, …	TnS000203533t02, TnS000217675t02, TnS000289077t06, TnS000414293t04, TnS000552461t01, TnS000695019t01, TnS000835831t09, TnS013779190t01	Megl_c19628_g3_i2.p1, Megl_c22674_g1_i1.p1, Megl_c26737_g1_i1.p1, Megl_c27427_g1_i2.p1, Megl_c27741_g1_i4.p1	GCHX01051787.1.p1, GCHX01148637.1.p1, GCHX01247710.1.p1, GCHX01449605.1.p2, GCZO01104352.1.p1, GCZO01206159.1.p1, GCZO01306790.1.p1, GCZO01308713.1.p1, gb|GFBZ01019770.1|.p1, gi|830892797|gb|GCZO01287376.1|.p1, gi|831018298|gb|GCZO01162145.1|.p1, gi|831066506|gb|GCZO01113941.1|.p1, gi|831095209|gb|GCZO01085249.1|.p1, gi|831122325|gb|GCZO01058138.1|.p1, gi|831169833|gb|GCZO01010855.1|.p1	GGJJ01000324.1.p1, GGJJ01001392.1.p1, GGJJ01005464.1.p1, GGJJ01008492.1.p1, GGJJ01014401.1.p1, GGJJ01016430.1.p1, GGJJ01016839.1.p1, GGJJ01021781.1.p1, GGJJ01023686.1.p1, GGJJ01042034.1.p1, GGJJ01048262.1.p1, GGJJ01055499.1.p1	GDQR01002242.1.p1, GDQR01002440.1.p1, GDQR01005546.1.p1, GDQR01022243.1.p1, GFLL01070149.1.p1, GFLL01132491.1.p1	GGJH01002163.1.p1, GGJH01006261.1.p1, GGJH01007990.1.p1, GGJH01008897.1.p1, GGJH01022499.1.p1, GGJH01024189.1.p1, GGJH01031200.1.p1, GGJH01037038.1.p1	HAMI01001127.1.p1, HAMI01002137.1.p1, HAMI01003649.1.p1, HAMI01008763.1.p1, HAMI01016000.1.p1, HAMI01023846.1.p1, HAMI01028058.1.p1, HAMI01034917.1.p1, HAMI01039851.1.p1	GBLJ01015859.1.p1, GBLJ01017730.1.p1, GBLJ01017752.1.p1, GBLJ01018161.1.p1, GBLJ01022229.1.p1, gb|GESU01000088.1|.p1, gb|GESU01001451.1|.p1, gb|GESU01011935.1|.p1, gb|GESU01015397.1|.p1, gb|GESU01017604.1|.p1, gb|GESU01018687.1|.p1, gb|GESU01021757.1|.p1	PILA_00667, PILA_00814, PILA_01548, PILA_01691, PILA_02253, PILA_03449, PILA_05040, PILA_06474, PILA_07658, PILA_08771, PILA_09245, PILA_09949, PILA_10202, PILA_11894, PILA_11896, PILA_13135, PILA_13394, PILA_13614, PILA_13615, PILA_13813, PILA_13981, PILA_14524, PILA_16716, PILA_16748, PILA_18640, PILA_21165, PILA_22677, PILA_22765, PILA_24475, PILA_24482, PILA_25048, PILA_25367, PILA_25935, PIL…	GAQR01009126.1.p4, GAQR01009582.1.p1, GAQR01015623.1.p1, GAQR01017256.1.p1, GAQR01020364.1.p1, GAQR01025360.1.p1, GAQR01026461.1.p1, GAQR01040231.1.p1, GAQR01040234.1.p1, GAQR01050843.1.p1, GAQR01053664.1.p1, GAQR01058497.1.p1, GFHB01094308.1.p1, GFHB01098414.1.p1, GFHB01104604.1.p1, GFHB01110705.1.p1, GFHB01138434.1.p1, GFHB01154136.1.p1, GFHB01156217.1.p1, GFHB01157582.1.p1, GFHB01163180.1.p1, …	GBQX01037781.1.p1, GBQX01038296.1.p1, GBQX01041521.1.p1, GBQX01046639.1.p1, GBQX01054357.1.p2, GDQD01001470.1.p1, GDQD01004718.1.p1, GDQD01010071.1.p1, GDQD01010073.1.p1	GECO01010618.1.p1, GECO01014430.1.p1, GECO01017232.1.p1, GECO01017605.1.p1, GECO01033443.1.p1, GECO01046909.1.p1, GGAU01003265.1.p6, GGAU01008365.1.p3, GGAU01014452.1.p3, GGAU01020992.1.p2, GGAU01022361.1.p2, GGAU01022994.1.p1, GGAU01023784.1.p3, GGAU01025879.1.p3, GGAU01028042.1.p1, GGAU01028704.1.p1, GGAU01029620.1.p4, GGAU01032363.1.p4, GGAU01034229.1.p1, GGAU01039223.1.p3, GGAU01039357.1.p1, …	GGJK01001896.1.p1, GGJK01001981.1.p1, GGJK01001982.1.p2, GGJK01007166.1.p1, GGJK01007432.1.p1, GGJK01008005.1.p1, GGJK01008354.1.p1, GGJK01013234.1.p1, GGJK01024396.1.p1, GGJK01027693.1.p1, GGJK01029377.1.p1, GGJK01029597.1.p1, GGJK01036852.1.p1	1A_all_NT_comp112829_c0_seq3_1 type=cds; aalen=441_78%_complete; clen=1686; strand=+; offs=23-1348; evgclass=main_okay_match_1A_all_NT_comp112829_c0_seq6_pct_100_98;, 1A_all_NT_comp113477_c0_seq1_1 type=cds; aalen=611_72%_complete; clen=2521; strand=+; offs=376-2211; evgclass=main_okay_match_6A_I21_VO_L_524_T_101_184 C_0.029_Length_2109_pct_98_100;, 1A_all_VO_L_13514_T_15_41_1 C_0.273_Length_2280…	GFZL01000786.1.p1, GFZL01001141.1.p2, GFZL01005791.1.p1, GFZL01006834.1.p1, GFZL01008482.1.p1, GFZL01009446.1.p1, GFZL01011553.1.p1, GFZL01011773.1.p1, GFZL01017962.1.p2, GFZL01021682.1.p1, GFZL01021979.1.p1, GFZL01023118.1.p1, GFZL01023165.1.p1, GFZL01024992.1.p1, GFZL01026569.1.p1, GFZL01026747.1.p2, GFZL01026795.1.p1, GFZL01027041.1.p1	GAZW02015839.1.p1, GAZW02050376.1.p1, GAZW02050380.1.p1, GAZW02056232.1.p1, GAZW02062837.1.p1, GAZW02079322.1.p1, GAZW02079324.1.p1, GFFY01007654.1.p1, GFFY01010503.1.p1, GFFY01012058.1.p1, GFFY01012567.1.p1, GFFY01014581.1.p1, GFFY01015647.1.p1, GFFY01019270.1.p1, GFFY01038756.1.p1, GFFY01052265.1.p1, GFFY01064077.1.p1, GFFY01081737.1.p1, GFFY01094618.1.p1, GFFY01118985.1.p1, PSME_02188, PSME_14…	Thoc_c14386_g1_i1.p1, Thoc_c19755_g1_i1.p1, Thoc_c26579_g1_i1.p1, Thoc_c28562_g1_i3.p1, Thoc_c28562_g1_i3.p2, Thoc_c4852_g1_i1.p1	SEGI_07494, SEGI_07513, SEGI_07699, SEGI_07987, SEGI_10075, SEGI_14297, SEGI_14846, SEGI_15352, SEGI_19041, SEGI_19180, SEGI_20139, SEGI_20340, SEGI_21442, SEGI_23367, SEGI_24967, SEGI_26068, SEGI_28056, SEGI_28625, SEGI_32800, SEGI_33497, SEGI_35815, SEGI_37546, SEGI_37713, SEGI_38436	SESE_025898, SESE_026342, SESE_026474, SESE_026769, SESE_029775, SESE_030360, SESE_031778, SESE_035287, SESE_037760, SESE_038715, SESE_042373, SESE_045584, SESE_048303, SESE_048394, SESE_050440, SESE_052006, SESE_052214, SESE_055953, SESE_057278, SESE_057986, SESE_061711, SESE_062284, SESE_065286, SESE_066635, SESE_067121, SESE_067800, SESE_069163, SESE_069530, SESE_071085, SESE_071766, SESE_0720…
OG0000028	GGJG01000754.1.p1, GGJG01002218.1.p1, GGJG01002242.1.p1, GGJG01002243.1.p1, GGJG01002418.1.p1, GGJG01005552.1.p1, GGJG01008684.1.p1, GGJG01010318.1.p1, GGJG01012042.1.p1, GGJG01015641.1.p1, GGJG01024337.1.p1, GGJG01028543.1.p1, GGJG01028934.1.p1, GGJG01031315.1.p1, GGJG01031787.1.p1, GGJG01039003.1.p1, GGJG01039432.1.p1, GGJG01040467.1.p1, GGJG01043434.1.p1	evm_27.model.AmTr_v1.0_scaffold00018.128 pacid=31557383 transcript=evm_27.model.AmTr_v1.0_scaffold00018.128 locus=evm_27.TU.AmTr_v1.0_scaffold00018.128 ID=evm_27.model.AmTr_v1.0_scaffold00018.128.v1.0 annot-version=v1.0, evm_27.model.AmTr_v1.0_scaffold00018.43 pacid=31557368 transcript=evm_27.model.AmTr_v1.0_scaffold00018.43 locus=evm_27.TU.AmTr_v1.0_scaffold00018.43 ID=evm_27.model.AmTr_v1.0_sca…	GBYR01027198.1.p1, GBYR01033573.1.p1, GBYR01033577.1.p1, GBYR01037570.1.p1, GBYR01047937.1.p1, GBYR01061183.1.p1, GGBW01007003.1.p1, GGBW01007006.1.p1, GGBW01030380.1.p1, GGBW01053380.1.p1, GHLL01213346.1.p1, GHLL01213347.1.p1, GHLL01246144.1.p1, GHLL01272404.1.p1, Gb_06566, Gb_09271, Gb_09997, Gb_20360, Gb_21486, Gb_27513, Gb_36481, Gb_39506, Gb_39510	TnS000403451t02, TnS000499845t01, TnS000500993t04, TnS000544263t01, TnS000544263t03, TnS000593333t07, TnS000766203t06, TnS000766203t07, TnS000766203t08, TnS000818515t01, TnS000818903t01, TnS000904187t05, TnS000937925t05, TnS001041165t01, TnS001042995t03, TnS013882896t01	Megl_c3347_g1_i1.p1, Megl_c344_g1_i1.p2, Megl_c4598_g1_i1.p1	GCHX01253357.1.p1, GCZO01000878.1.p1, GCZO01009585.1.p1, GCZO01209421.1.p1, GCZO01304132.1.p1, GQ0203_E04.1, PG01r131103s158351278--668-2272, PG01r131103s167962962--5873-7298, PG01r131103s168061988--10353-11918--pseudo--s6--fs, PG01r131103s168200974--2581-3900, PG01r131103s168224275--20313-18522, PG01r131103s168426862--7496-6013--pseudo--s1--fs, PG01r131103s168567758--301392-303099--pseudo--s3, c…	GGJJ01000801.1.p1, GGJJ01001272.1.p1, GGJJ01005737.1.p1, GGJJ01008846.1.p1, GGJJ01009209.1.p1, GGJJ01010481.1.p1, GGJJ01012871.1.p1, GGJJ01015940.1.p1, GGJJ01030599.1.p1, GGJJ01033721.1.p1, GGJJ01043504.1.p1, GGJJ01050220.1.p1	GDQR01010237.1.p1, GDQR01010249.1.p1, GDQR01013334.1.p1, GDQR01021016.1.p1, GFLL01064208.1.p1, GFLL01122268.1.p1, GFLL01122269.1.p1, GFLL01128797.1.p1, GFLL01128817.1.p1, GFLL01128818.1.p1, gb|GFBO01088174.1|.p1, gb|GFBO01089833.1|.p1	GGJH01006380.1.p1, GGJH01007136.1.p1, GGJH01009030.1.p1, GGJH01011687.1.p1, GGJH01015022.1.p1, GGJH01024701.1.p1, GGJH01028395.1.p1, GGJH01029087.1.p1, GGJH01030265.1.p1, GGJH01030914.1.p1, GGJH01031951.1.p1, GGJH01032581.1.p1, GGJH01035997.1.p1, GGJH01039386.1.p1, GGJH01043021.1.p1	HAMI01002876.1.p1, HAMI01004625.1.p1, HAMI01009649.1.p1, HAMI01014177.1.p1, HAMI01016538.1.p1, HAMI01016721.1.p1, HAMI01017432.1.p1, HAMI01017734.1.p1, HAMI01020425.1.p1, HAMI01023007.1.p1, HAMI01032233.1.p1, HAMI01033830.1.p1	GBLJ01024845.1.p1, GBLJ01033670.1.p1, GBLJ01044083.1.p1, gb|GESU01009067.1|.p1	PILA_02204, PILA_02766, PILA_02782, PILA_06728, PILA_08291, PILA_08294, PILA_11255, PILA_14298, PILA_15135, PILA_16216, PILA_18601, PILA_19509, PILA_20606, PILA_20873, PILA_22156, PILA_25341, PILA_25984, PILA_27339, PILA_30710, PILA_32765, PILA_32769, PILA_33428, PILA_36692, gb|GEUZ01005658.1|.p1, gb|GEUZ01006466.1|.p1, gb|GEUZ01006628.1|.p1, gb|GEUZ01006671.1|.p1, gb|GEUZ01006695.1|.p1, gb|GEUZ0…	GAQR01027034.1.p1, GAQR01034286.1.p1, GAQR01041533.1.p1, GAQR01041539.1.p1, GAQR01044205.1.p1, GAQR01045317.1.p1, GAQR01045318.1.p1, GAQR01047650.1.p1, GFHB01028956.1.p1, GFHB01136308.1.p1	GBQX01032892.1.p1, GBQX01035450.1.p1, GBQX01039229.1.p1, GBQX01041756.1.p1, GDQD01000888.1.p1, GDQD01005849.1.p1	GECO01005360.1.p1, GECO01014962.1.p1, GECO01015288.1.p1, GECO01019509.1.p1, GECO01027707.1.p1, GECO01030443.1.p1, GECO01035093.1.p1, GECO01035521.1.p1, GECO01037812.1.p1, GECO01038003.1.p1, GECO01042077.1.p1, GECO01042888.1.p1, GECO01043122.1.p1, GECO01051849.1.p1, GGAU01010980.1.p4, GGAU01019153.1.p1, GGAU01023288.1.p1, GGAU01039733.1.p3, GGAU01039949.1.p1	GGJK01004285.1.p1, GGJK01006422.1.p1, GGJK01008116.1.p1, GGJK01015702.1.p1, GGJK01015865.1.p1, GGJK01020743.1.p1, GGJK01022119.1.p1, GGJK01022804.1.p1, GGJK01024217.1.p1, GGJK01024495.1.p1, GGJK01025756.1.p1, GGJK01025986.1.p1, GGJK01026168.1.p1, GGJK01031647.1.p1	1A_I11_NT_comp48916_c0_seq1_1 type=cds; aalen=507_90%_complete; clen=1677; strand=-; offs=1654-131; evgclass=main_okay_match_1A_I11_NT_comp48916_c0_seq3_pct_99_100;, 1A_I11_VO_L_1_T_142131_226447_1 C_0.000_Length_1437 type=cds; aalen=443_92%_complete; clen=1437; strand=+; offs=13-1344; evgclass=main_okay_match_1A_I11_VO_L_1_T_142132_226447 C_0.000_Length_997_pct_98_66;, 1A_I3_VO_L_1_T_59278_13673…	GFZL01000249.1.p1, GFZL01009523.1.p1, GFZL01014473.1.p1, GFZL01014525.1.p1, GFZL01016652.1.p1, GFZL01019818.1.p1, GFZL01020622.1.p1, GFZL01021411.1.p1, GFZL01021774.1.p1, GFZL01023968.1.p1, GFZL01025507.1.p1, GFZL01027304.1.p1, GFZL01027565.1.p1, GFZL01027601.1.p1, GFZL01027805.1.p1	GAZW02091812.1.p1, GAZW02091829.1.p1, GAZW02098807.1.p1, GAZW02099200.1.p1, GFFY01002046.1.p1, GFFY01015024.1.p1, GFFY01015798.1.p1, GFFY01018410.1.p1, GFFY01037095.1.p1, GFFY01058754.1.p1, PSME_01296, PSME_01327, PSME_04169, PSME_08981, PSME_11205, PSME_11919, PSME_11989, PSME_18437, PSME_22821, PSME_24987, PSME_37063, PSME_37913, PSME_39000, PSME_42137	Thoc_c17746_g2_i1.p1, Thoc_c17900_g1_i1.p1, Thoc_c28433_g1_i1.p1, Thoc_c7607_g2_i1.p1	SEGI_00694, SEGI_02480, SEGI_02646, SEGI_02953, SEGI_03602, SEGI_04773, SEGI_05104, SEGI_07812, SEGI_08724, SEGI_08993, SEGI_09347, SEGI_10925, SEGI_11134, SEGI_11218, SEGI_12918, SEGI_14628, SEGI_15844, SEGI_15891, SEGI_17049, SEGI_18167, SEGI_18182, SEGI_18412, SEGI_18452, SEGI_19029, SEGI_19055, SEGI_20892, SEGI_21044, SEGI_24297, SEGI_24589, SEGI_24740, SEGI_25451, SEGI_28143, SEGI_30800, SEG…	SESE_009078, SESE_018932, SESE_026089, SESE_027021, SESE_028512, SESE_028836, SESE_029843, SESE_031274, SESE_031760, SESE_031978, SESE_032969, SESE_035015, SESE_038409, SESE_039139, SESE_040311, SESE_040582, SESE_040739, SESE_042221, SESE_048850, SESE_056533, SESE_056696, SESE_057183, SESE_057385, SESE_057525, SESE_058258, SESE_058572, SESE_059546, SESE_060927, SESE_061477, SESE_063349, SESE_0634…
OG0000029	GGJG01001872.1.p1, GGJG01002368.1.p1, GGJG01002776.1.p1, GGJG01007581.1.p1, GGJG01011063.1.p1, GGJG01011506.1.p1, GGJG01011507.1.p1, GGJG01012689.1.p1, GGJG01012739.1.p1, GGJG01013625.1.p1, GGJG01013827.1.p1, GGJG01022762.1.p1, GGJG01023700.1.p1, GGJG01027288.1.p1, GGJG01028821.1.p1, GGJG01029583.1.p1, GGJG01029741.1.p1, GGJG01030101.1.p1, GGJG01030247.1.p1, GGJG01031634.1.p1, GGJG01032252.1.p1, …	evm_27.model.AmTr_v1.0_scaffold00001.452 pacid=31551378 transcript=evm_27.model.AmTr_v1.0_scaffold00001.452 locus=evm_27.TU.AmTr_v1.0_scaffold00001.452 ID=evm_27.model.AmTr_v1.0_scaffold00001.452.v1.0 annot-version=v1.0, evm_27.model.AmTr_v1.0_scaffold00022.288 pacid=31552354 transcript=evm_27.model.AmTr_v1.0_scaffold00022.288 locus=evm_27.TU.AmTr_v1.0_scaffold00022.288 ID=evm_27.model.AmTr_v1.0_…	GBYR01006846.1.p1, GBYR01019450.1.p1, GBYR01030005.1.p1, GBYR01030006.1.p1, GBYR01038723.1.p1, GGBW01010636.1.p1, GGBW01029556.1.p1, GHLL01107274.1.p1, GHLL01219927.1.p1, GHLL01225073.1.p1, GHLL01435311.1.p1, Gb_02300, Gb_06162, Gb_08446, Gb_08474, Gb_13999, Gb_15693, Gb_15697, Gb_16073, Gb_18169, Gb_25664, Gb_27804, Gb_32739, Gb_32740, Gb_33785, Gb_38469, Gb_38470, Gb_40815	TnS000181459t02, TnS000674141t41	Megl_c22996_g1_i3.p1, Megl_c23904_g1_i5.p1, Megl_c26598_g1_i3.p1, Megl_c26598_g1_i4.p1, Megl_c27717_g1_i1.p4, Megl_c28405_g1_i2.p1, Megl_c28540_g11_i1.p1, Megl_c28540_g1_i1.p1	GCHX01049747.1.p1, GCHX01050983.1.p1, GCHX01451013.1.p1, GCZO01104011.1.p1, GCZO01205541.1.p1, GQ0204_P23.1, GQ03407_O14.1, GQ03606_O17.1, GQ04002_K08.4, PG01r131103s168136776--70053-25311--pseudo--s7, PG01r131103s168544757--8751-6906, PG29_BFMXY_Trinity_Pasafly_comp409348_c0_seq1_rc, PG29_BFMXY_Trinity_Pasafly_comp418911_c0_seq3, PG29_BFMXY_Trinity_Pasafly_comp419411_c1_seq2, contig11914--2114-4…	GGJJ01002433.1.p1, GGJJ01002849.1.p1, GGJJ01002856.1.p1, GGJJ01003042.1.p1, GGJJ01007750.1.p1, GGJJ01011241.1.p1, GGJJ01011725.1.p1, GGJJ01012995.1.p1, GGJJ01015335.1.p1, GGJJ01024784.1.p1, GGJJ01050377.1.p1	GDQR01002518.1.p1, GDQR01013044.1.p1, GDQR01017622.1.p1, GFLL01024590.1.p1, GFLL01031216.1.p1, GFLL01057558.1.p1, GFLL01065266.1.p1, GFLL01069436.1.p1, GFLL01071628.1.p1, GFLL01100365.1.p1, GFLL01100367.1.p1, GFLL01100370.1.p1, GFLL01101214.1.p1, GFLL01101218.1.p1, GFLL01116950.1.p1, GFLL01119729.1.p1, GFLL01125824.1.p1, gb|GFBO01020394.1|.p1, gb|GFBO01087606.1|.p1	GGJH01003416.1.p1, GGJH01004598.1.p1, GGJH01006730.1.p1, GGJH01007237.1.p1, GGJH01007590.1.p1, GGJH01010544.1.p1, GGJH01010942.1.p1, GGJH01011560.1.p1, GGJH01013248.1.p1, GGJH01015103.1.p1, GGJH01015326.1.p1, GGJH01021381.1.p1, GGJH01021589.1.p1, GGJH01021698.1.p1, GGJH01025099.1.p1, GGJH01025733.1.p1, GGJH01026454.1.p1, GGJH01026697.1.p1, GGJH01027996.1.p1, GGJH01028089.1.p1, GGJH01028138.1.p1, …	HAMI01001730.1.p1, HAMI01002239.1.p1, HAMI01005357.1.p1, HAMI01006568.1.p1, HAMI01008547.1.p1, HAMI01010231.1.p1, HAMI01019570.1.p1, HAMI01024433.1.p1, HAMI01024599.1.p1, HAMI01027175.1.p1, HAMI01027432.1.p1, HAMI01028042.1.p1, HAMI01028317.1.p1, HAMI01029848.1.p1, HAMI01032989.1.p1, HAMI01039484.1.p1	GBLJ01000346.1.p1, GBLJ01009509.1.p1, GBLJ01021297.1.p1, GBLJ01028225.1.p1, GBLJ01028493.1.p1, GBLJ01043013.1.p1, gb|GESU01000659.1|.p1, gb|GESU01005585.1|.p1, gb|GESU01029563.1|.p1, gb|GESU01044438.1|.p1	PILA_01138, PILA_03039, PILA_03779, PILA_04434, PILA_06206, PILA_06600, PILA_06941, PILA_09397, PILA_09932, PILA_10708, PILA_10911, PILA_11230, PILA_12462, PILA_15798, PILA_17709, PILA_18522, PILA_21140, PILA_24883, PILA_25448, PILA_26676, PILA_29372, PILA_29857, PILA_31953, PILA_33492, PILA_36076, PILA_37277, PILA_37993, gb|GEUZ01006014.1|.p1, gb|GEUZ01006053.1|.p1, gb|GEUZ01006106.1|.p1, gb|GEU…	GAQR01010276.1.p1, GAQR01028672.1.p1, GAQR01033052.1.p1, GAQR01039532.1.p1, GAQR01039540.1.p1, GAQR01039544.1.p1, GAQR01040449.1.p1, GAQR01045428.1.p1, GAQR01045430.1.p1, GFHB01005072.1.p1, GFHB01024366.1.p1, GFHB01079508.1.p1, GFHB01080531.1.p1, GFHB01126560.1.p1, GFHB01156906.1.p1, GFHB01183279.1.p1	GBQX01029276.1.p1, GBQX01030871.1.p1, GBQX01041676.1.p1, GDQD01006678.1.p1, GDQD01006983.1.p1, GDQD01008679.1.p1, GDQD01010257.1.p1, GDQD01010267.1.p1	GECO01007486.1.p1, GECO01015192.1.p1, GECO01015451.1.p1, GECO01017486.1.p1, GECO01019161.1.p1, GECO01021096.1.p1, GECO01021605.1.p1, GECO01024787.1.p1, GECO01025273.1.p1, GECO01026115.1.p1, GECO01028518.1.p1, GECO01031164.1.p1, GECO01031748.1.p1, GECO01032378.1.p1, GECO01032697.1.p1, GECO01034585.1.p1, GECO01034923.1.p1, GECO01039672.1.p1, GECO01041977.1.p1, GECO01043928.1.p1, GECO01047469.1.p1, …	GGJK01003090.1.p1, GGJK01006812.1.p1, GGJK01008159.1.p1, GGJK01009450.1.p1, GGJK01010785.1.p1, GGJK01014442.1.p1, GGJK01018451.1.p1, GGJK01018756.1.p1, GGJK01019219.1.p1, GGJK01019525.1.p1, GGJK01021461.1.p1, GGJK01022696.1.p1, GGJK01024016.1.p1, GGJK01024690.1.p1, GGJK01026000.1.p1, GGJK01026349.1.p1, GGJK01026684.1.p1, GGJK01028417.1.p1, GGJK01030030.1.p1, GGJK01032767.1.p1, GGJK01033104.1.p1, …	1A_I11_VO_L_1_T_157615_226447_1 C_0.000_Length_2188 type=cds; aalen=465_63%_complete; clen=2188; strand=+; offs=221-1618; evgclass=main_okay_match_1A_I11_VO_L_1_T_157623_226447 C_0.000_Length_1578_pct_98_100;, 1A_I3_NT_comp48364_c0_seq2_1 type=cds; aalen=518_87%_complete; clen=1770; strand=+; offs=22-1578; evgclass=main_okay_match_5A_all_VO_L_2_T_296303_409051 C_0.000_Length_1606_pct_99_100;, 1A_…	GFZL01001462.1.p1, GFZL01001857.1.p1, GFZL01004837.1.p1, GFZL01007754.1.p1, GFZL01011813.1.p1, GFZL01013479.1.p1, GFZL01014439.1.p1, GFZL01018855.1.p1, GFZL01020182.1.p1, GFZL01020671.1.p1, GFZL01021549.1.p1, GFZL01022637.1.p1, GFZL01022656.1.p1, GFZL01023330.1.p1, GFZL01023477.1.p1, GFZL01023574.1.p1, GFZL01023742.1.p1, GFZL01023743.1.p1, GFZL01025520.1.p1, GFZL01026250.1.p1, GFZL01026892.1.p1, …	GAZW02021693.1.p1, GAZW02041148.1.p1, GAZW02045984.1.p1, GAZW02045985.1.p1, GAZW02045987.1.p1, GAZW02046989.1.p1, GAZW02076877.1.p1, GAZW02078443.1.p1, GFFY01015429.1.p1, GFFY01019989.1.p1, GFFY01020738.1.p1, GFFY01024679.1.p1, GFFY01037998.1.p1, GFFY01044922.1.p1, GFFY01069399.1.p1, GFFY01088053.1.p1, GFFY01098397.1.p1, PSME_01279, PSME_08535, PSME_13439, PSME_16730, PSME_16732, PSME_18075, PSME…	Thoc_c14170_g1_i1.p1, Thoc_c27413_g1_i1.p1, Thoc_c27413_g2_i1.p1, Thoc_c28739_g1_i1.p1, Thoc_c40718_g1_i1.p1	SEGI_00140, SEGI_03527, SEGI_06575, SEGI_07393, SEGI_09346, SEGI_10552, SEGI_12668, SEGI_15635, SEGI_17346, SEGI_19930, SEGI_23637, SEGI_23697, SEGI_24567, SEGI_25126, SEGI_34152, SEGI_35162, SEGI_37727, SEGI_39485, SEGI_40859	SESE_005780, SESE_020107, SESE_026525, SESE_027492, SESE_029628, SESE_030073, SESE_030162, SESE_032597, SESE_032903, SESE_033422, SESE_036878, SESE_042327, SESE_051276, SESE_051442, SESE_061847, SESE_063252, SESE_072660, SESE_077475, SESE_081617, SESE_083687, SESE_084745, SESE_084886, SESE_089374, SESE_091403, SESE_094177, SESE_095492, SESE_109514, SESE_120057, SESE_121094, SESE_123314, SESE_1233…
OG0000030	GGJG01029562.1.p1, GGJG01033036.1.p1, GGJG01038381.1.p1		GBYR01006690.1.p1, GBYR01012223.1.p1, GBYR01028267.1.p2, GGBW01036107.1.p1, GGBW01037026.1.p1, GGBW01051468.1.p1, GHLL01022770.1.p1, GHLL01061826.1.p1, GHLL01064512.1.p1, GHLL01065590.1.p1, GHLL01130321.1.p1, GHLL01142539.1.p2, GHLL01188163.1.p1, GHLL01211149.1.p1, GHLL01212073.1.p1, GHLL01221678.1.p1, GHLL01221685.1.p2, GHLL01226902.1.p1, GHLL01261642.1.p1, GHLL01277285.1.p1, GHLL01283172.1.p1, …			GCHX01054922.1.p1, GCHX01246548.1.p1, GCHX01250980.1.p2, GCHX01252287.1.p1, GCHX01252439.1.p1, GCHX01349691.1.p1, GCHX01349831.1.p1, GCHX01352727.1.p1, GCHX01447227.1.p2, GCZO01005422.1.p1, GCZO01108699.1.p1, GCZO01108954.1.p1, gb|GFBZ01015735.1|.p1, gb|GFBZ01022518.1|.p1, gi|830916136|gb|GCZO01264038.1|.p1, gi|830922386|gb|GCZO01257788.1|.p1, gi|830982110|gb|GCZO01198068.1|.p1, gi|830982635|gb|G…	GGJJ01038064.1.p1, GGJJ01045203.1.p1, GGJJ01050771.1.p2	GDQR01013737.1.p1, GFLL01026878.1.p1, GFLL01051752.1.p1, GFLL01075627.1.p1, GFLL01075628.1.p1, GFLL01086929.1.p1, GFLL01124408.1.p2, GFLL01154273.1.p1, GFLL01167612.1.p1	GGJH01019634.1.p1		GBLJ01001417.1.p1, GBLJ01030179.1.p1, GBLJ01040250.1.p1, GBLJ01046935.1.p1, gb|GESU01001212.1|.p1, gb|GESU01027528.1|.p1, gb|GESU01034311.1|.p1	PILA_23461, PILA_34060, gb|GEUZ01004371.1|.p1, gb|GEUZ01010417.1|.p1, gb|GEUZ01028701.1|.p1	GAQR01043011.1.p1, GFHB01009115.1.p1, GFHB01090836.1.p1, GFHB01091103.1.p1, GFHB01180839.1.p1, GFHB01191835.1.p1	GBQX01032754.1.p1, GBQX01034711.1.p1	GECO01007066.1.p1, GECO01012072.1.p1, GECO01019146.1.p1, GECO01020740.1.p1, GECO01031967.1.p1, GECO01037056.1.p1, GECO01047752.1.p1, GECO01048435.1.p1, GECO01050146.1.p1, GGAU01024330.1.p3, GGAU01029050.1.p1, GGAU01029894.1.p1, GGAU01031943.1.p5, GGAU01037621.1.p1, GGAU01040372.1.p2, GGAU01045126.1.p3, GGAU01045937.1.p1	GGJK01016003.1.p3, GGJK01037175.1.p1	2A_I10_VO_L_1573_T_180_233_1 C_0.214_Length_2106 type=cds; aalen=471_67%_complete; clen=2106; strand=-; offs=1432-17; evgclass=main_okay_match_2A_I10_VO_L_1573_T_141_233 C_0.143_Length_1623_pct_99_99;, 2A_I15_VO_L_28_T_184_413_1 C_0.045_Length_1176 type=cds; aalen=260_66%_complete; clen=1176; strand=-; offs=1042-260; evgclass=main_okay_match_2A_I15_VO_L_28_T_161_413 C_0.034_Length_750_pct_98_73;,…	GFZL01010821.1.p1, GFZL01015313.1.p1, GFZL01015900.1.p1, GFZL01016537.1.p2, GFZL01019336.1.p1, GFZL01025028.1.p1, GFZL01027327.1.p1, GFZL01027449.1.p1	GAZW02000417.1.p2, GAZW02008606.1.p1, GAZW02021295.1.p1, GAZW02037148.1.p2, GAZW02037823.1.p1, GAZW02037824.1.p1, GAZW02039089.1.p1, GFFY01011267.1.p1, GFFY01026076.1.p1, GFFY01030195.1.p1, GFFY01036467.1.p2, GFFY01037709.1.p1, GFFY01052306.1.p1, GFFY01074783.1.p1, GFFY01097916.1.p1, GFFY01101959.1.p1, GFFY01118992.1.p1, GFFY01131883.1.p1, PSME_01452, PSME_04515, PSME_07385, PSME_09014, PSME_0995…	Thoc_c1143_g1_i1.p1, Thoc_c53534_g1_i1.p1, Thoc_c60708_g1_i1.p1, Thoc_c8784_g1_i1.p1	SEGI_02294, SEGI_03151, SEGI_03591, SEGI_04829, SEGI_05215, SEGI_05785, SEGI_08082, SEGI_11058, SEGI_11985, SEGI_18667, SEGI_18927, SEGI_21473, SEGI_22162, SEGI_22695, SEGI_22812, SEGI_22990, SEGI_23446, SEGI_23481, SEGI_23820, SEGI_24205, SEGI_25364, SEGI_26470, SEGI_28175, SEGI_29158, SEGI_29747, SEGI_30873, SEGI_31812, SEGI_31846, SEGI_32357, SEGI_32980, SEGI_32995, SEGI_34931, SEGI_35110, SEG…	SESE_004976, SESE_021959, SESE_025501, SESE_026284, SESE_026371, SESE_027825, SESE_028039, SESE_028596, SESE_028883, SESE_029242, SESE_029692, SESE_030781, SESE_031149, SESE_031305, SESE_031657, SESE_031670, SESE_031676, SESE_031877, SESE_032623, SESE_033937, SESE_034159, SESE_034601, SESE_034683, SESE_034928, SESE_034939, SESE_034988, SESE_034993, SESE_036281, SESE_036303, SESE_036850, SESE_0383…
OG0000031	GGJG01000018.1.p1, GGJG01001260.1.p1, GGJG01001609.1.p1, GGJG01002174.1.p1, GGJG01003586.1.p1, GGJG01004353.1.p1, GGJG01006944.1.p1, GGJG01006945.1.p1, GGJG01008990.1.p1, GGJG01010010.1.p1, GGJG01010852.1.p1, GGJG01012621.1.p1, GGJG01015229.1.p1, GGJG01018038.1.p1, GGJG01019521.1.p1, GGJG01020356.1.p1, GGJG01020992.1.p2, GGJG01023275.1.p1, GGJG01026755.1.p2, GGJG01028114.1.p1, GGJG01037694.1.p1	evm_27.model.AmTr_v1.0_scaffold00010.388 pacid=31573163 transcript=evm_27.model.AmTr_v1.0_scaffold00010.388 locus=evm_27.TU.AmTr_v1.0_scaffold00010.388 ID=evm_27.model.AmTr_v1.0_scaffold00010.388.v1.0 annot-version=v1.0, evm_27.model.AmTr_v1.0_scaffold00126.6 pacid=31551919 transcript=evm_27.model.AmTr_v1.0_scaffold00126.6 locus=evm_27.TU.AmTr_v1.0_scaffold00126.6 ID=evm_27.model.AmTr_v1.0_scaffo…	GBYR01003056.1.p1, GBYR01012426.1.p1, GBYR01014964.1.p1, GBYR01026832.1.p1, GBYR01026833.1.p1, GBYR01034488.1.p1, GBYR01034490.1.p1, GGBW01008753.1.p1, GGBW01008754.1.p1, GGBW01011592.1.p1, GGBW01013806.1.p1, GGBW01022846.1.p1, GGBW01041865.1.p1, GGBW01048840.1.p1, GGBW01051404.1.p1, GGBW01052132.1.p1, GHLL01098698.1.p1, GHLL01211762.1.p1, GHLL01215178.1.p1, GHLL01221392.1.p1, Gb_26175	TnS000498063t45	Megl_c27040_g1_i1.p1, Megl_c9062_g1_i1.p1	GCHX01045510.1.p1, GCHX01047756.1.p1, GCHX01048624.1.p1, GCHX01053328.1.p2, GCHX01148850.1.p1, GCZO01204491.1.p1, GCZO01208633.1.p1, GCZO01300881.1.p1, GCZO01303615.1.p1, GCZO01304277.1.p1, gb|GFBZ01010722.1|.p1, gb|GFBZ01011788.1|.p1, gi|830826342|gb|GCZO01349795.1|.p1, gi|830828016|gb|GCZO01348121.1|.p1, gi|830829055|gb|GCZO01347083.1|.p1, gi|830831656|gb|GCZO01344483.1|.p1, gi|830837380|gb|GCZ…	GGJJ01000016.1.p1, GGJJ01000114.1.p1, GGJJ01000591.1.p1, GGJJ01001635.1.p1, GGJJ01001760.1.p1, GGJJ01002236.1.p1, GGJJ01003721.1.p1, GGJJ01004538.1.p1, GGJJ01004773.1.p1, GGJJ01005694.1.p1, GGJJ01007089.1.p1, GGJJ01007577.1.p1, GGJJ01008550.1.p1, GGJJ01009147.1.p1, GGJJ01010015.1.p1, GGJJ01010174.1.p1, GGJJ01010708.1.p1, GGJJ01011026.1.p1, GGJJ01011134.1.p1, GGJJ01013031.1.p1, GGJJ01014373.1.p1, …	GDQR01000231.1.p1, GDQR01001353.1.p1, GDQR01001807.1.p1, GDQR01004357.1.p1, GDQR01004622.1.p1, GDQR01007546.1.p1, GDQR01008260.1.p1, GDQR01008900.1.p1, GDQR01014991.1.p1, GDQR01018204.1.p1, GFLL01015952.1.p1, GFLL01069129.1.p1, GFLL01069458.1.p1, GFLL01103125.1.p1, GFLL01104234.1.p2, GFLL01131545.1.p1, GFLL01133344.1.p1, GFLL01133357.1.p1, GFLL01135069.1.p1, GFLL01140888.1.p1, GFLL01142458.1.p1, …	GGJH01004124.1.p1, GGJH01005795.1.p1, GGJH01007307.1.p1, GGJH01007408.1.p1, GGJH01008123.1.p1, GGJH01009066.1.p1, GGJH01010220.1.p1, GGJH01010229.1.p1, GGJH01011893.1.p1, GGJH01012035.1.p1, GGJH01012392.1.p1, GGJH01014921.1.p1, GGJH01016304.1.p1, GGJH01016968.1.p1, GGJH01017447.1.p1, GGJH01019441.1.p1, GGJH01023274.1.p1, GGJH01029735.1.p1, GGJH01030893.1.p1, GGJH01035150.1.p1, GGJH01036644.1.p1, …	HAMI01000967.1.p1, HAMI01001064.1.p1, HAMI01004624.1.p1, HAMI01004697.1.p1, HAMI01005189.1.p1, HAMI01007637.1.p1, HAMI01007844.1.p1, HAMI01009713.1.p1, HAMI01014443.1.p1, HAMI01014908.1.p1, HAMI01015984.1.p1, HAMI01016324.1.p1, HAMI01033407.1.p1, HAMI01040068.1.p1, HAMI01040188.1.p1	GBLJ01000451.1.p1, GBLJ01002054.1.p1, GBLJ01002617.1.p1, GBLJ01003459.1.p1, GBLJ01004803.1.p1, GBLJ01008795.1.p1, GBLJ01008889.1.p1, GBLJ01011336.1.p1, GBLJ01016846.1.p1, GBLJ01019044.1.p1, GBLJ01019246.1.p1, GBLJ01019438.1.p1, GBLJ01022898.1.p1, GBLJ01030432.1.p1, GBLJ01033016.1.p1, GBLJ01039527.1.p1, GBLJ01043119.1.p1, GBLJ01044050.1.p1, gb|GESU01009073.1|.p1, gb|GESU01009075.1|.p1, gb|GESU0101…	PILA_06944, PILA_07750, PILA_11138, PILA_14887, PILA_16410, PILA_16414, PILA_23032, PILA_29257, PILA_31074, PILA_31190, PILA_33078, PILA_33831, PILA_35995, PILA_37298, gb|GEUZ01011252.1|.p1, gb|GEUZ01011976.1|.p1, gb|GEUZ01012541.1|.p1, gb|GEUZ01013024.1|.p1, gb|GEUZ01013336.1|.p1, gb|GEUZ01013348.1|.p1, gb|GEUZ01013408.1|.p1, gb|GEUZ01013633.1|.p1, gb|GEUZ01014109.1|.p1, gb|GEUZ01014219.1|.p1, g…	GAQR01008026.1.p2, GAQR01008327.1.p2, GAQR01014392.1.p1, GAQR01020038.1.p1, GAQR01023440.1.p1, GAQR01028854.1.p1, GAQR01031709.1.p1, GAQR01036513.1.p1, GAQR01039486.1.p1, GAQR01039614.1.p1, GAQR01042717.1.p1, GAQR01044558.1.p1, GAQR01044561.1.p1, GAQR01047842.1.p1, GAQR01047843.1.p1, GAQR01048334.1.p1, GAQR01049200.1.p1, GFHB01026358.1.p1, GFHB01029431.1.p1, GFHB01055812.1.p1, GFHB01126270.1.p1, …	GBQX01028343.1.p2, GBQX01031658.1.p1, GBQX01032960.1.p2, GBQX01037410.1.p1, GBQX01037450.1.p1, GBQX01041160.1.p1, GBQX01045973.1.p1, GBQX01047159.1.p1, GBQX01049325.1.p1, GDQD01001240.1.p1, GDQD01001325.1.p1, GDQD01005673.1.p1, GDQD01006091.1.p1, GDQD01008278.1.p1, GDQD01009292.1.p1	GECO01003713.1.p1, GECO01004747.1.p1, GECO01005559.1.p1, GECO01007213.1.p1, GECO01009151.1.p1, GECO01010105.1.p1, GECO01012538.1.p1, GECO01012960.1.p1, GECO01013022.1.p1, GECO01013256.1.p1, GECO01015506.1.p1, GECO01020329.1.p1, GECO01021196.1.p1, GECO01024128.1.p1, GECO01027017.1.p1, GECO01027798.1.p1, GECO01029861.1.p1, GECO01031533.1.p1, GECO01033053.1.p1, GECO01034953.1.p1, GECO01036329.1.p1, …	GGJK01007295.1.p1, GGJK01008151.1.p1, GGJK01010767.1.p1, GGJK01011089.1.p1, GGJK01013287.1.p1, GGJK01014952.1.p1, GGJK01018356.1.p1, GGJK01018497.1.p1, GGJK01019039.1.p1, GGJK01019274.1.p2, GGJK01019303.1.p1, GGJK01022095.1.p1, GGJK01022948.1.p1, GGJK01024215.1.p1, GGJK01025141.1.p1, GGJK01026918.1.p1, GGJK01029345.1.p1, GGJK01029350.1.p2, GGJK01030446.1.p1, GGJK01030529.1.p1, GGJK01030949.1.p1, …	1A_I11_VO_L_1966_T_113_140_1 C_0.230_Length_1452 type=cds; aalen=368_76%_complete; clen=1452; strand=-; offs=1363-257; evgclass=main_okay_match_1A_I11_VO_L_1966_T_109_140 C_0.213_Length_1234_pct_98_100;, 1A_I3_VO_L_1_T_15773_136734_1 C_0.000_Length_1927 type=cds; aalen=378_59%_complete-utrpoor; clen=1927; strand=-; offs=1691-555; evgclass=main_okay_match_1A_I3_VO_L_1_T_15792_136734 C_0.000_Length…	GFZL01005680.1.p1, GFZL01008321.1.p1, GFZL01009401.1.p1, GFZL01011565.1.p1, GFZL01011566.1.p1, GFZL01011772.1.p1, GFZL01012145.1.p1, GFZL01012190.1.p1, GFZL01012446.1.p1, GFZL01012687.1.p1, GFZL01012790.1.p1, GFZL01012886.1.p1, GFZL01012887.1.p1, GFZL01012888.1.p1, GFZL01012963.1.p1, GFZL01012990.1.p1, GFZL01013451.1.p1, GFZL01013679.1.p1, GFZL01013680.1.p1, GFZL01013759.1.p1, GFZL01022007.1.p1, …	GAZW02033542.1.p2, GAZW02033543.1.p1, GAZW02053851.1.p1, GAZW02053857.1.p1, GAZW02067836.1.p1, GAZW02068013.1.p1, GAZW02074616.1.p1, GAZW02075156.1.p1, GAZW02081728.1.p1, GAZW02081729.1.p1, GAZW02082347.1.p1, GAZW02082348.1.p2, GAZW02082349.1.p1, GAZW02083310.1.p1, GAZW02083315.1.p1, GAZW02097722.1.p1, GAZW02103428.1.p1, GFFY01011605.1.p1, GFFY01013705.1.p1, GFFY01015686.1.p1, GFFY01015796.1.p1, …		SEGI_11615, SEGI_12745, SEGI_28888, SEGI_38020	SESE_001384, SESE_028399, SESE_044830, SESE_127497
OG0000032	GGJG01021091.1.p1, GGJG01022121.1.p1, GGJG01030997.1.p1, GGJG01036726.1.p1, GGJG01043103.1.p1	evm_27.model.AmTr_v1.0_scaffold00829.1 pacid=31556912 transcript=evm_27.model.AmTr_v1.0_scaffold00829.1 locus=evm_27.TU.AmTr_v1.0_scaffold00829.1 ID=evm_27.model.AmTr_v1.0_scaffold00829.1.v1.0 annot-version=v1.0	GBYR01038617.1.p1, GGBW01003631.1.p1, GGBW01003633.1.p1, GGBW01003634.1.p2, GGBW01003638.1.p1, GGBW01003639.1.p1, GGBW01028659.1.p1, GHLL01217365.1.p1, GHLL01244816.1.p1, GHLL01311783.1.p1, Gb_00244, Gb_01644, Gb_01877, Gb_02765, Gb_03803, Gb_04512, Gb_08387, Gb_11922, Gb_12991, Gb_13496, Gb_14239, Gb_14661, Gb_15198, Gb_15201, Gb_19246, Gb_19841, Gb_19870, Gb_22222, Gb_23386, Gb_23865, Gb_24482,…		Megl_c13706_g1_i2.p1, Megl_c21971_g1_i1.p1, Megl_c26328_g3_i1.p1, Megl_c26328_g3_i2.p1, Megl_c27423_g1_i1.p2, Megl_c27642_g2_i2.p1, Megl_c27642_g2_i3.p1, Megl_c28156_g3_i5.p1, Megl_c28350_g2_i2.p1, Megl_c28596_g5_i6.p1	GCHX01145162.1.p1, GCHX01254513.1.p1, GCHX01453827.1.p1, GCZO01009236.1.p1, GCZO01203285.1.p1, gb|GFBZ01016344.1|.p1, gb|GFBZ01023970.1|.p1, gi|830828849|gb|GCZO01347288.1|.p1, gi|830995021|gb|GCZO01185160.1|.p1, gi|830996515|gb|GCZO01183673.1|.p1, gi|831002748|gb|GCZO01177690.1|.p1, gi|831008712|gb|GCZO01171727.1|.p1, gi|831027756|gb|GCZO01152689.1|.p1, gi|831048189|gb|GCZO01132258.1|.p1, gi|831…	GGJJ01018826.1.p1, GGJJ01021455.1.p1, GGJJ01030108.1.p1, GGJJ01041501.1.p1, GGJJ01045717.1.p1	GDQR01015636.1.p1, GDQR01015638.1.p1, GDQR01023126.1.p1, GFLL01042748.1.p1, GFLL01045725.1.p1, GFLL01100905.1.p1, GFLL01107783.1.p1, GFLL01107787.1.p1, GFLL01142639.1.p1, gb|GFBO01036232.1|.p1, gb|GFBO01051330.1|.p1	GGJH01020007.1.p1, GGJH01040511.1.p1, GGJH01042198.1.p2, GGJH01045253.1.p1	HAMI01003070.1.p1, HAMI01004425.1.p1, HAMI01039976.1.p1	GBLJ01002817.1.p1, GBLJ01032703.1.p1, GBLJ01047258.1.p1, gb|GESU01035104.1|.p1	PILA_00489, PILA_00981, PILA_01026, PILA_01277, PILA_01331, PILA_02126, PILA_02750, PILA_03157, PILA_03389, PILA_03468, PILA_03789, PILA_04041, PILA_05087, PILA_05097, PILA_05627, PILA_08713, PILA_10433, PILA_10765, PILA_11692, PILA_12234, PILA_12316, PILA_12348, PILA_12543, PILA_12616, PILA_12915, PILA_12919, PILA_13375, PILA_13843, PILA_14503, PILA_15383, PILA_15747, PILA_16504, PILA_17789, PIL…	GFHB01013953.1.p1, GFHB01028130.1.p1, GFHB01062113.1.p1, GFHB01100405.1.p1, GFHB01103485.1.p1, GFHB01120673.1.p1, GFHB01121851.1.p1, GFHB01139730.1.p1, GFHB01179689.1.p1	GBQX01022537.1.p1, GBQX01031058.1.p1, GBQX01032385.1.p1, GBQX01038049.1.p1	GECO01004554.1.p1, GECO01005562.1.p1, GECO01005751.1.p1, GECO01022793.1.p1, GGAU01013290.1.p1, GGAU01018369.1.p1, GGAU01019801.1.p1, GGAU01022487.1.p1, GGAU01037087.1.p2, GGAU01037782.1.p2, GGAU01037884.1.p2, GGAU01044388.1.p1, GGAU01047236.1.p1	GGJK01040019.1.p1, GGJK01041292.1.p1, GGJK01042569.1.p1, GGJK01044769.1.p1	1A_I9_VO_L_1_T_41785_116761_1 C_0.000_Length_900 type=cds; aalen=203_68%_complete; clen=900; strand=-; offs=687-76; evgclass=main_okay_match_1A_I9_VO_L_1_T_41823_116761 C_0.000_Length_671_pct_99_100;, 1A_I9_VO_L_1_T_42563_116761_1 C_0.000_Length_808 type=cds; aalen=151_56%_complete-utrpoor; clen=808; strand=+; offs=117-572; evgclass=main_okay_match_1A_I9_VO_L_1_T_41750_116761 C_0.000_Length_280_p…	GFZL01009743.1.p1, GFZL01013829.1.p1, GFZL01014496.1.p1, GFZL01014641.1.p1, GFZL01015474.1.p1, GFZL01019615.1.p1, GFZL01024510.1.p1, GFZL01026766.1.p1, GFZL01026990.1.p1, GFZL01028220.1.p1	GAZW02005641.1.p1, GAZW02008866.1.p1, GAZW02026060.1.p1, GAZW02030292.1.p1, GAZW02039163.1.p1, GAZW02041290.1.p1, GAZW02047686.1.p1, GAZW02051365.1.p1, GAZW02061248.1.p2, GAZW02074243.1.p1, GAZW02076775.1.p2, GAZW02076776.1.p2, GAZW02090201.1.p1, GAZW02096243.1.p1, GAZW02097542.1.p1, GAZW02097545.1.p1, GAZW02102559.1.p1, GAZW02102715.1.p1, GFFY01013799.1.p2, GFFY01022250.1.p1, GFFY01032962.1.p1, …	Thoc_c21491_g1_i1.p1, Thoc_c24875_g1_i1.p1, Thoc_c25981_g1_i1.p1, Thoc_c27553_g1_i1.p1, Thoc_c27644_g1_i2.p1, Thoc_c28406_g1_i3.p1, Thoc_c28617_g1_i1.p1, Thoc_c28825_g1_i2.p1, Thoc_c28827_g1_i2.p1, Thoc_c29091_g1_i3.p2, Thoc_c29107_g2_i4.p1, Thoc_c32748_g1_i1.p1	SEGI_00496, SEGI_01202, SEGI_04622, SEGI_05729, SEGI_08006, SEGI_10450, SEGI_11722, SEGI_15034, SEGI_15840, SEGI_16527, SEGI_16819, SEGI_17312, SEGI_17640, SEGI_21022, SEGI_21421, SEGI_22713, SEGI_23354, SEGI_27600, SEGI_27976, SEGI_29273, SEGI_31722, SEGI_31938, SEGI_31970, SEGI_32252, SEGI_35103, SEGI_38033, SEGI_39483, SEGI_39522	SESE_022265, SESE_025768, SESE_026819, SESE_027132, SESE_027525, SESE_027981, SESE_028229, SESE_028643, SESE_030035, SESE_031512, SESE_032867, SESE_033034, SESE_033285, SESE_033653, SESE_033664, SESE_033810, SESE_033906, SESE_033951, SESE_034337, SESE_035695, SESE_035884, SESE_038453, SESE_038945, SESE_039045, SESE_039281, SESE_039843, SESE_041568, SESE_041706, SESE_041717, SESE_041769, SESE_0420…
OG0000033	GGJG01011456.1.p1, GGJG01021996.1.p1, GGJG01023499.1.p1, GGJG01027029.1.p1, GGJG01029101.1.p1, GGJG01033937.1.p1, GGJG01034130.1.p1		GBYR01030957.1.p1, GBYR01039520.1.p1, GBYR01039865.1.p1, GHLL01160797.1.p1, GHLL01243239.1.p1, GHLL01687388.1.p1, Gb_02744			GCHX01045364.1.p1, GCHX01050172.1.p1, GCHX01053704.1.p1, GCHX01148077.1.p1, GCHX01249507.1.p1, GCHX01251385.1.p1, GCHX01253416.1.p1, GCHX01253439.1.p1, GCHX01254727.1.p1, GCHX01254757.1.p1, GCHX01352456.1.p1, GCHX01448866.1.p1, GCHX01449224.1.p1, GCZO01000267.1.p1, GCZO01001328.1.p1, GCZO01005138.1.p1, GCZO01006523.1.p1, GCZO01007280.1.p1, GCZO01009710.1.p1, GCZO01100392.1.p3, GCZO01101399.1.p1, …	GGJJ01023495.1.p1, GGJJ01023652.1.p1, GGJJ01024032.1.p1, GGJJ01025757.1.p1, GGJJ01030611.1.p1, GGJJ01032320.1.p2, GGJJ01036245.1.p1, GGJJ01040315.1.p1, GGJJ01042272.1.p1, GGJJ01042866.1.p1, GGJJ01047068.1.p1, GGJJ01055404.1.p1, GGJJ01057512.1.p1	GDQR01015246.1.p1, GDQR01016039.1.p1, GFLL01000075.1.p1, GFLL01003753.1.p1, GFLL01012190.1.p1, GFLL01028972.1.p1, GFLL01042073.1.p1, GFLL01072072.1.p1, GFLL01082742.1.p1, GFLL01082839.1.p1, GFLL01087817.1.p1, GFLL01089720.1.p1, GFLL01089908.1.p1, GFLL01102264.1.p1, GFLL01105049.1.p1, GFLL01105060.1.p1, GFLL01105061.1.p1, GFLL01106517.1.p1, GFLL01109847.1.p1, GFLL01142173.1.p1, GFLL01142357.1.p1, …	GGJH01032222.1.p1, GGJH01035541.1.p1, GGJH01037257.1.p1, GGJH01046655.1.p1	HAMI01006406.1.p1, HAMI01023907.1.p1	GBLJ01001329.1.p1, GBLJ01006292.1.p1, GBLJ01007805.1.p1, GBLJ01008009.1.p1, GBLJ01010657.1.p1, GBLJ01013013.1.p1, GBLJ01016759.1.p1, GBLJ01017405.1.p1, GBLJ01025681.1.p1, GBLJ01026281.1.p1, GBLJ01026565.1.p1, GBLJ01028773.1.p1, GBLJ01029560.1.p1, GBLJ01037500.1.p1, GBLJ01043181.1.p1, gb|GESU01000081.1|.p1, gb|GESU01000083.1|.p1, gb|GESU01010601.1|.p1, gb|GESU01013357.1|.p1, gb|GESU01014881.1|.p1,…	PILA_01784, PILA_10923, gb|GEUZ01013277.1|.p1, gb|GEUZ01018306.1|.p1, gb|GEUZ01019007.1|.p1, gb|GEUZ01019214.1|.p1, gb|GEUZ01019359.1|.p1, gb|GEUZ01019736.1|.p1, gb|GEUZ01021443.1|.p1, gb|GEUZ01021793.1|.p1, gb|GEUZ01022797.1|.p1, gb|GEUZ01022826.1|.p1, gb|GEUZ01023273.1|.p1, gb|GEUZ01023356.1|.p1, gb|GEUZ01023660.1|.p1, gb|GEUZ01023762.1|.p1, gb|GEUZ01023782.1|.p1, gb|GEUZ01023830.1|.p1, gb|GEUZ…	GFHB01060847.1.p1, GFHB01063878.1.p1, GFHB01064525.1.p1, GFHB01065893.1.p1, GFHB01112625.1.p1, GFHB01123379.1.p1, GFHB01125349.1.p1, GFHB01146743.1.p1, GFHB01184464.1.p1	GBQX01016591.1.p1, GBQX01019506.1.p1, GBQX01029628.1.p1, GBQX01032396.1.p1, GBQX01034343.1.p1, GBQX01038198.1.p1, GBQX01041233.1.p1, GBQX01048289.1.p1, GDQD01003740.1.p1, GDQD01007565.1.p1, GDQD01008475.1.p1	GECO01000033.1.p1, GECO01006531.1.p1, GECO01011567.1.p1, GECO01020072.1.p1, GECO01046440.1.p1, GGAU01029444.1.p1	GGJK01022640.1.p1, GGJK01030440.1.p1, GGJK01034493.1.p1	1A_I11_VO_L_62261_T_5_6_1 C_0.364_Length_772 type=cds; aalen=199_77%_complete; clen=772; strand=+; offs=14-613; evgclass=main_okay_match_5A_all_VO_L_2_T_71221_409051 C_0.000_Length_857_pct_99_99;, 1A_I9_VO_L_47381_T_9_31_1 C_0.457_Length_828 type=cds; aalen=155_56%_complete-utrpoor; clen=828; strand=+; offs=276-743; evgclass=main_okay_match_1A_I9_VO_L_47381_T_7_31 C_0.197_Length_540_pct_99_100;, …	GFZL01000861.1.p1, GFZL01009342.1.p1	GAZW02000402.1.p1, GAZW02001676.1.p1, GAZW02010951.1.p1, GAZW02012023.1.p1, GAZW02012751.1.p1, GAZW02012988.1.p1, GAZW02022691.1.p1, GAZW02022764.1.p1, GAZW02028136.1.p1, GAZW02029812.1.p1, GAZW02031649.1.p1, GAZW02037170.1.p1, GAZW02040915.1.p1, GAZW02048003.1.p2, GAZW02048798.1.p1, GAZW02053562.1.p1, GAZW02056354.1.p1, GAZW02077005.1.p1, GAZW02081733.1.p1, GAZW02088015.1.p1, GAZW02090869.1.p3, …	Thoc_c21644_g2_i1.p1, Thoc_c25016_g1_i3.p1, Thoc_c27191_g3_i1.p1, Thoc_c27221_g1_i1.p1, Thoc_c58590_g1_i1.p1	SEGI_01361, SEGI_17503, SEGI_22227, SEGI_22394, SEGI_33233, SEGI_34621, SEGI_40284	SESE_004178, SESE_033250, SESE_042906, SESE_057644, SESE_057725, SESE_059260, SESE_059332, SESE_059604, SESE_059628, SESE_060203, SESE_061704, SESE_065174, SESE_066110, SESE_066996, SESE_067829, SESE_075078, SESE_075245, SESE_076306, SESE_076578, SESE_076826, SESE_078772, SESE_079649, SESE_081499, SESE_082048, SESE_083168, SESE_084451, SESE_085650, SESE_086914, SESE_087410, SESE_092419, SESE_0938…
OG0000034	GGJG01010390.1.p1, GGJG01014368.1.p2, GGJG01022120.1.p1, GGJG01023324.1.p3, GGJG01024706.1.p1, GGJG01025436.1.p1, GGJG01025685.1.p3, GGJG01026989.1.p1, GGJG01031689.1.p1, GGJG01031769.1.p1, GGJG01031772.1.p1, GGJG01031816.1.p1, GGJG01034570.1.p1, GGJG01034851.1.p1, GGJG01035138.1.p1, GGJG01035234.1.p1, GGJG01036681.1.p1, GGJG01038218.1.p1, GGJG01039119.1.p2, GGJG01039810.1.p1, GGJG01041198.1.p1, …					GCHX01048863.1.p1, GCHX01049962.1.p1, GCHX01050261.1.p1, GCHX01050501.1.p1, GCHX01146828.1.p3, GCHX01150406.1.p1, GCHX01249973.1.p1, GCHX01348500.1.p1, GCHX01354520.1.p1, GCHX01454963.1.p1, GCZO01104609.1.p1, GCZO01202501.1.p1, GCZO01209314.1.p1, GCZO01303036.1.p3, gb|GFBZ01003594.1|.p1, gb|GFBZ01008218.1|.p1, gb|GFBZ01008557.1|.p1, gb|GFBZ01009097.1|.p1, gb|GFBZ01009914.1|.p1, gb|GFBZ01012523.1|…	GGJJ01024641.1.p1, GGJJ01025548.1.p1, GGJJ01026540.1.p3, GGJJ01029873.1.p1, GGJJ01030212.1.p1, GGJJ01032978.1.p1, GGJJ01033217.1.p1, GGJJ01035175.1.p1, GGJJ01036932.1.p1, GGJJ01037146.1.p1, GGJJ01037558.1.p1, GGJJ01041709.1.p1, GGJJ01044132.1.p1, GGJJ01045723.1.p1, GGJJ01051458.1.p1, GGJJ01058666.1.p1	GDQR01000042.1.p1, GDQR01001106.1.p1, GDQR01005444.1.p1, GDQR01007376.1.p1, GDQR01010813.1.p1, GDQR01011711.1.p1, GDQR01013392.1.p1, GDQR01016889.1.p1, GDQR01017270.1.p1, GDQR01017548.1.p1, GDQR01019305.1.p1, GDQR01020691.1.p1, GDQR01021884.1.p1, GDQR01022552.1.p1, GDQR01023542.1.p1, GFLL01000530.1.p1, GFLL01001439.1.p1, GFLL01004028.1.p1, GFLL01005909.1.p1, GFLL01008525.1.p1, GFLL01011137.1.p1, …	GGJH01024939.1.p1, GGJH01044126.1.p2	HAMI01006275.1.p1, HAMI01007297.1.p2, HAMI01012923.1.p1, HAMI01013205.1.p1, HAMI01013765.1.p1, HAMI01016373.1.p1, HAMI01020327.1.p1, HAMI01022003.1.p2, HAMI01022607.1.p1, HAMI01024746.1.p1, HAMI01027732.1.p2, HAMI01028972.1.p1, HAMI01031029.1.p1, HAMI01031479.1.p1, HAMI01033651.1.p2, HAMI01034118.1.p3, HAMI01035741.1.p2, HAMI01039852.1.p1	GBLJ01001278.1.p1, GBLJ01008146.1.p1, GBLJ01009130.1.p1, GBLJ01009876.1.p1, GBLJ01014879.1.p1, GBLJ01016426.1.p1, GBLJ01018477.1.p1, GBLJ01021556.1.p1, GBLJ01023151.1.p1, GBLJ01027618.1.p1, GBLJ01028057.1.p1, GBLJ01029399.1.p1, GBLJ01030195.1.p1, GBLJ01030643.1.p1, GBLJ01039427.1.p1, GBLJ01044609.1.p1	PILA_04309, PILA_06591	GAQR01011516.1.p1, GAQR01012275.1.p1, GFHB01016665.1.p1, GFHB01034650.1.p1, GFHB01035264.1.p2, GFHB01042064.1.p1, GFHB01045631.1.p2, GFHB01055506.1.p1, GFHB01060254.1.p1, GFHB01069533.1.p1, GFHB01087884.1.p1, GFHB01091547.1.p2, GFHB01101021.1.p1, GFHB01101219.1.p1, GFHB01105822.1.p1, GFHB01123062.1.p1, GFHB01128381.1.p1, GFHB01168414.1.p1, GFHB01180826.1.p1, GFHB01192077.1.p1	GBQX01025664.1.p1, GBQX01035037.1.p1, GBQX01036608.1.p1, GBQX01037345.1.p1, GBQX01038775.1.p1, GBQX01039428.1.p1, GBQX01040480.1.p1, GBQX01043457.1.p1, GBQX01044492.1.p1, GBQX01045738.1.p1, GBQX01046661.1.p1, GBQX01048964.1.p1, GBQX01049366.1.p1, GBQX01050343.1.p3, GBQX01050537.1.p2, GBQX01050583.1.p1, GBQX01050934.1.p2, GBQX01052101.1.p1, GBQX01052196.1.p1, GBQX01052452.1.p1, GBQX01053500.1.p2, …	GECO01000083.1.p1, GECO01001131.1.p1, GECO01002250.1.p1, GECO01002367.1.p1, GECO01002695.1.p1, GECO01003218.1.p1, GECO01005001.1.p1, GECO01007020.1.p1, GECO01008155.1.p1, GECO01009657.1.p1, GECO01012235.1.p1, GECO01012893.1.p1, GECO01013986.1.p1, GECO01016128.1.p1, GECO01017027.1.p1, GECO01023536.1.p1, GECO01030475.1.p1, GECO01030982.1.p1, GECO01031409.1.p1, GECO01032056.1.p1, GECO01034019.1.p1, …	GGJK01019439.1.p1, GGJK01023903.1.p1, GGJK01024245.1.p2, GGJK01025318.1.p1, GGJK01025610.1.p1, GGJK01026852.1.p1, GGJK01027369.1.p1, GGJK01027370.1.p1, GGJK01027508.1.p1, GGJK01028202.1.p1, GGJK01028730.1.p1, GGJK01030003.1.p1, GGJK01030539.1.p1, GGJK01032664.1.p1, GGJK01033816.1.p1, GGJK01033965.1.p1, GGJK01034363.1.p1, GGJK01036042.1.p1, GGJK01036225.1.p1, GGJK01037075.1.p1, GGJK01037874.1.p1, …	1A_I9_VO_L_32972_T_1_2_1 C_0.500_Length_1170 type=cds; aalen=158_40%_complete-utrpoor; clen=1170; strand=-; offs=715-239; evgclass=main_okay_match_1A_I9_NT_comp59207_c0_seq1_pct_100_86;, 1A_all_VO_L_84584_T_3_3_1 C_0.333_Length_743 type=cds; aalen=159_64%_complete; clen=743; strand=+; offs=30-509; evgclass=main_okay_match_5A_all_NT_comp983224_c0_seq1_pct_100_99;, 2A_I15_NT_comp6188_c0_seq1_1 type…	GFZL01011892.1.p1, GFZL01012746.1.p1, GFZL01014692.1.p1, GFZL01019047.1.p1, GFZL01019168.1.p1	GAZW02000743.1.p1, GAZW02003010.1.p1, GAZW02004674.1.p1, GAZW02008854.1.p1, GAZW02011092.1.p1, GAZW02012066.1.p1, GAZW02016219.1.p1, GAZW02018502.1.p1, GAZW02023024.1.p1, GAZW02024223.1.p1, GAZW02026889.1.p1, GAZW02031792.1.p1, GAZW02057895.1.p3, GAZW02058745.1.p1, GAZW02062361.1.p1, GAZW02080528.1.p2, GAZW02087325.1.p1, GAZW02092122.1.p1, GAZW02097712.1.p1, GAZW02099300.1.p1, GAZW02099586.1.p5, …			SESE_057586, SESE_065859, SESE_069798, SESE_085181, SESE_085441, SESE_096116, SESE_098665, SESE_109198, SESE_120579, SESE_129795, SESE_134629, SESE_149314
OG0000035	GGJG01026977.1.p1, GGJG01034305.1.p1		GBYR01033148.1.p1, GBYR01038120.1.p1, GBYR01049504.1.p1, GGBW01005177.1.p1, GGBW01006618.1.p3, GGBW01048709.1.p1, GHLL01130244.1.p1, GHLL01220687.1.p1, GHLL01271879.1.p2, GHLL01282437.1.p1, GHLL01282579.1.p1, GHLL01282712.1.p1, Gb_03181, Gb_18389, Gb_18726, Gb_19066, Gb_33182, Gb_35549		Megl_c28212_g3_i3.p1	GCHX01045301.1.p1, GCHX01046365.1.p1, GCHX01247079.1.p1, GCHX01350420.1.p1, GCZO01107068.1.p1, GCZO01200038.1.p1, gb|GFBZ01021649.1|.p1, gb|GFBZ01023091.1|.p1, gi|830886138|gb|GCZO01294035.1|.p1, gi|830929592|gb|GCZO01250582.1|.p1, gi|831010306|gb|GCZO01170133.1|.p1, gi|831050007|gb|GCZO01130440.1|.p1, gi|831090880|gb|GCZO01089578.1|.p1, gi|831134754|gb|GCZO01045711.1|.p1	GGJJ01011839.1.p1, GGJJ01021438.1.p1, GGJJ01047010.1.p1, GGJJ01053873.1.p1	GFLL01017943.1.p1, GFLL01025844.1.p1, GFLL01051083.1.p1, GFLL01066588.1.p1, GFLL01097709.1.p1, GFLL01120135.1.p1, GFLL01132735.1.p1, GFLL01141075.1.p1, GFLL01142998.1.p1, gb|GFBO01024582.1|.p2, gb|GFBO01073935.1|.p1	GGJH01009385.1.p1, GGJH01020225.1.p1, GGJH01022589.1.p1, GGJH01026115.1.p1	HAMI01005576.1.p1, HAMI01012311.1.p1, HAMI01018202.1.p1, HAMI01028841.1.p1	GBLJ01007250.1.p1, GBLJ01009085.1.p1, GBLJ01013658.1.p1, GBLJ01025978.1.p1, GBLJ01047433.1.p1, gb|GESU01004525.1|.p1, gb|GESU01012445.1|.p1, gb|GESU01015988.1|.p1	PILA_37383, gb|GEUZ01001207.1|.p1, gb|GEUZ01005463.1|.p1, gb|GEUZ01008524.1|.p1, gb|GEUZ01020050.1|.p1, gb|GEUZ01026478.1|.p1, gb|GEUZ01031547.1|.p1	GFHB01017003.1.p1, GFHB01096700.1.p1, GFHB01141900.1.p1, GFHB01152414.1.p1, GFHB01167958.1.p1	GBQX01032940.1.p1, GBQX01041899.1.p1, GBQX01048556.1.p1, GBQX01053739.1.p1, GDQD01005774.1.p1	GECO01000175.1.p1, GECO01006305.1.p1, GECO01009231.1.p1, GECO01022363.1.p1, GECO01029665.1.p1, GECO01031782.1.p1, GECO01034580.1.p1, GGAU01023294.1.p2, GGAU01029775.1.p1, GGAU01037543.1.p2, GGAU01046424.1.p3	GGJK01042503.1.p1	1A_I8_VO_L_3_T_42879_67407_1 C_0.000_Length_2272 type=cds; aalen=248_32%_complete-utrbad; clen=2272; strand=+; offs=952-1698; evgclass=main_okay_match_1A_I8_VO_L_3_T_42876_67407 C_0.000_Length_951_pct_98_100;, 1A_all_VO_L_1093_T_209_327_1 C_0.173_Length_4401 type=cds; aalen=1302_88%_complete; clen=4401; strand=+; offs=177-4085; evgclass=main_okay_match_1A_all_VO_L_1093_T_179_327 C_0.173_Length_43…	GFZL01007445.1.p1, GFZL01014777.1.p1, GFZL01016631.1.p1, GFZL01016983.1.p1, GFZL01017050.1.p1, GFZL01017434.1.p1, GFZL01019225.1.p1, GFZL01026817.1.p1, GFZL01027546.1.p1, GFZL01027998.1.p1	GAZW02102587.1.p1, GAZW02102964.1.p1, GAZW02102966.1.p1, GFFY01000536.1.p1, GFFY01000699.1.p1, GFFY01003912.1.p1, GFFY01032534.1.p1, GFFY01035376.1.p1, GFFY01043591.1.p1, GFFY01045026.1.p2, GFFY01046782.1.p1, GFFY01067978.1.p1, GFFY01074723.1.p1, GFFY01103027.1.p1, PSME_00540, PSME_00977, PSME_01302, PSME_01481, PSME_01733, PSME_01952, PSME_02662, PSME_02665, PSME_03055, PSME_03350, PSME_03392, P…	Thoc_c60978_g1_i1.p1	SEGI_03334, SEGI_04823, SEGI_05502, SEGI_05964, SEGI_06810, SEGI_06877, SEGI_07554, SEGI_08852, SEGI_09371, SEGI_16273, SEGI_16334, SEGI_23603, SEGI_37110, SEGI_39682, SEGI_39723, SEGI_41160	SESE_017088, SESE_028313, SESE_028457, SESE_028946, SESE_029911, SESE_030232, SESE_030993, SESE_031024, SESE_031252, SESE_031361, SESE_031714, SESE_032716, SESE_033407, SESE_034829, SESE_035923, SESE_035996, SESE_037412, SESE_038722, SESE_038764, SESE_039241, SESE_039302, SESE_039390, SESE_039512, SESE_039561, SESE_040783, SESE_042183, SESE_042651, SESE_043304, SESE_043402, SESE_045713, SESE_0471…
OG0000036	GGJG01008552.1.p1, GGJG01021411.1.p1	evm_27.model.AmTr_v1.0_scaffold00001.466 pacid=31551136 transcript=evm_27.model.AmTr_v1.0_scaffold00001.466 locus=evm_27.TU.AmTr_v1.0_scaffold00001.466 ID=evm_27.model.AmTr_v1.0_scaffold00001.466.v1.0 annot-version=v1.0, evm_27.model.AmTr_v1.0_scaffold00010.8 pacid=31573155 transcript=evm_27.model.AmTr_v1.0_scaffold00010.8 locus=evm_27.TU.AmTr_v1.0_scaffold00010.8 ID=evm_27.model.AmTr_v1.0_scaffo…	Gb_00763		Megl_c26194_g3_i1.p1, Megl_c26490_g1_i3.p1, Megl_c27220_g2_i1.p1, Megl_c28643_g1_i1.p1	GCHX01250119.1.p1, GCHX01253689.1.p1, GCHX01345913.1.p1, GCZO01003837.1.p1, GCZO01006094.1.p1, GCZO01100651.1.p1, GCZO01103897.1.p1, GCZO01104852.1.p1, GCZO01204640.1.p1, GCZO01306974.1.p1, gb|GFBZ01007169.1|.p1, gi|830838065|gb|GCZO01338074.1|.p1, gi|830848412|gb|GCZO01327729.1|.p1, gi|830866002|gb|GCZO01310245.1|.p1, gi|830981583|gb|GCZO01198595.1|.p1, gi|830992296|gb|GCZO01187885.1|.p1, gi|830…	GGJJ01000018.1.p1, GGJJ01006695.1.p1, GGJJ01007983.1.p1, GGJJ01010905.1.p1, GGJJ01022501.1.p1, GGJJ01052952.1.p1, GGJJ01056543.1.p1	GDQR01015450.1.p1, GDQR01019264.1.p1, GFLL01101508.1.p1, GFLL01117191.1.p1, GFLL01124837.1.p1, GFLL01131663.1.p1, GFLL01131666.1.p1, GFLL01134066.1.p1, GFLL01134077.1.p1, GFLL01142667.1.p1, gb|GFBO01094802.1|.p1, gb|GFBO01096071.1|.p1, gb|GFBO01096073.1|.p1	GGJH01017198.1.p1, GGJH01021718.1.p1, GGJH01024564.1.p1, GGJH01025254.1.p1, GGJH01025671.1.p1, GGJH01026822.1.p1, GGJH01032327.1.p2, GGJH01034277.1.p1, GGJH01038031.1.p1, GGJH01045148.1.p1	HAMI01003368.1.p1, HAMI01008082.1.p1, HAMI01012140.1.p1, HAMI01020086.1.p1, HAMI01031221.1.p1, HAMI01032422.1.p1	GBLJ01002313.1.p1, GBLJ01003291.1.p1, GBLJ01005390.1.p1, GBLJ01005746.1.p1, GBLJ01006409.1.p1, GBLJ01016143.1.p1, GBLJ01018107.1.p1, GBLJ01022186.1.p1, GBLJ01026229.1.p1, gb|GESU01023253.1|.p1, gb|GESU01024101.1|.p1	PILA_10328, PILA_28617, PILA_33787, gb|GEUZ01004716.1|.p1, gb|GEUZ01004832.1|.p1, gb|GEUZ01012193.1|.p1, gb|GEUZ01012290.1|.p1, gb|GEUZ01012385.1|.p1, gb|GEUZ01013173.1|.p1, gb|GEUZ01015984.1|.p1, gb|GEUZ01019626.1|.p1, gb|GEUZ01020227.1|.p1, gb|GEUZ01020871.1|.p1, gb|GEUZ01021537.1|.p1, gb|GEUZ01022586.1|.p1, gb|GEUZ01023361.1|.p1, gb|GEUZ01024097.1|.p1, gb|GEUZ01024886.1|.p1, gb|GEUZ01024900.1|…	GFHB01034036.1.p1, GFHB01044461.1.p1, GFHB01046741.1.p1, GFHB01086240.1.p1, GFHB01128337.1.p1, GFHB01145702.1.p1, GFHB01147981.1.p1, GFHB01150505.1.p1, GFHB01173876.1.p1	GBQX01019051.1.p1, GBQX01027749.1.p1, GBQX01037518.1.p1, GBQX01038329.1.p1, GBQX01052524.1.p1, GDQD01004289.1.p1, GDQD01007481.1.p1	GECO01005697.1.p1, GECO01009308.1.p1, GECO01014493.1.p1, GECO01015079.1.p1, GECO01016831.1.p1, GECO01036732.1.p1, GECO01039192.1.p1, GECO01046312.1.p1, GECO01050477.1.p1, GGAU01002512.1.p1, GGAU01002953.1.p2, GGAU01018285.1.p1, GGAU01020034.1.p4, GGAU01024021.1.p2, GGAU01037598.1.p1, GGAU01037742.1.p1, GGAU01037861.1.p2, GGAU01038089.1.p2, GGAU01046721.1.p4, GGAU01047570.1.p2, GGAU01047833.1.p1, …	GGJK01022430.1.p1, GGJK01031124.1.p1, GGJK01031424.1.p1, GGJK01034032.1.p1, GGJK01036160.1.p1	1A_I11_NT_comp50735_c0_seq3_1 type=cds; aalen=816_79%_complete; clen=3077; strand=-; offs=3011-561; evgclass=main_okay_match_1A_I11_NT_comp50735_c0_seq8_pct_99_100;, 1A_I11_VO_L_4867_T_33_50_1 C_0.406_Length_1345 type=cds; aalen=365_81%_complete; clen=1345; strand=-; offs=1277-180; evgclass=main_okay_match_1A_I11_VO_L_4867_T_29_50 C_0.246_Length_1061_pct_99_91;, 1A_I5_VO_L_1_T_27678_64687_1 C_0.0…	GFZL01001372.1.p1, GFZL01007645.1.p1, GFZL01009695.1.p1, GFZL01010818.1.p1, GFZL01011482.1.p1, GFZL01015347.1.p1, GFZL01017094.1.p1, GFZL01019075.1.p1, GFZL01019203.1.p1, GFZL01019293.1.p1, GFZL01022694.1.p1, GFZL01024210.1.p1, GFZL01025959.1.p1, GFZL01026534.1.p1, GFZL01026536.1.p1, GFZL01027260.1.p1, GFZL01028237.1.p1	GAZW02001980.1.p2, GAZW02005808.1.p1, GAZW02034623.1.p1, GAZW02047762.1.p1, GAZW02049351.1.p1, GAZW02069745.1.p1, GAZW02094001.1.p1, GAZW02097926.1.p1, GAZW02099264.1.p1, GAZW02100517.1.p1, GAZW02100976.1.p1, GAZW02101393.1.p1, GAZW02102975.1.p1, GAZW02103035.1.p1, GFFY01000242.1.p1, GFFY01000847.1.p1, GFFY01002124.1.p1, GFFY01007389.1.p1, GFFY01016580.1.p1, GFFY01026829.1.p1, GFFY01031399.1.p1, …	Thoc_c26956_g1_i1.p1, Thoc_c27844_g2_i1.p1, Thoc_c27844_g2_i2.p1, Thoc_c28763_g3_i1.p1, Thoc_c28763_g4_i1.p1, Thoc_c29082_g1_i3.p1, Thoc_c29109_g3_i4.p3, Thoc_c29109_g3_i4.p5, Thoc_c5053_g1_i1.p1	SEGI_01147, SEGI_01773, SEGI_02721, SEGI_03844, SEGI_04672, SEGI_05862, SEGI_07407, SEGI_09027, SEGI_12920, SEGI_14125, SEGI_14837, SEGI_15400, SEGI_16271, SEGI_17324, SEGI_19725, SEGI_21134, SEGI_21762, SEGI_23634, SEGI_24073, SEGI_24579, SEGI_25087, SEGI_25620, SEGI_26637, SEGI_26728, SEGI_28830, SEGI_28960, SEGI_32510, SEGI_32831, SEGI_32845, SEGI_32867, SEGI_33314, SEGI_33655, SEGI_34180, SEG…	SESE_001743, SESE_014082, SESE_025959, SESE_026088, SESE_026836, SESE_027283, SESE_027819, SESE_028058, SESE_028373, SESE_028923, SESE_028943, SESE_029801, SESE_030649, SESE_031166, SESE_032020, SESE_032351, SESE_032854, SESE_033238, SESE_033564, SESE_033576, SESE_033775, SESE_033823, SESE_034231, SESE_034242, SESE_034358, SESE_034675, SESE_035401, SESE_035757, SESE_035981, SESE_035983, SESE_0361…
OG0000037	GGJG01001155.1.p1, GGJG01001156.1.p1, GGJG01001237.1.p1, GGJG01001926.1.p1, GGJG01005986.1.p1, GGJG01012119.1.p1, GGJG01013454.1.p1, GGJG01014752.1.p1, GGJG01015645.1.p1, GGJG01020129.1.p1, GGJG01023454.1.p1, GGJG01031002.1.p1, GGJG01037430.1.p1, GGJG01038246.1.p1, GGJG01044863.1.p1	evm_27.model.AmTr_v1.0_scaffold00005.226 pacid=31575872 transcript=evm_27.model.AmTr_v1.0_scaffold00005.226 locus=evm_27.TU.AmTr_v1.0_scaffold00005.226 ID=evm_27.model.AmTr_v1.0_scaffold00005.226.v1.0 annot-version=v1.0, evm_27.model.AmTr_v1.0_scaffold00022.231 pacid=31552280 transcript=evm_27.model.AmTr_v1.0_scaffold00022.231 locus=evm_27.TU.AmTr_v1.0_scaffold00022.231 ID=evm_27.model.AmTr_v1.0_…	GBYR01002728.1.p1, GBYR01003644.1.p1, GBYR01013023.1.p1, GBYR01013109.1.p1, GBYR01013610.1.p1, GBYR01015459.1.p1, GBYR01024437.1.p1, GBYR01034051.1.p1, GBYR01035219.1.p1, GGBW01008936.1.p1, GGBW01008937.1.p1, GGBW01008939.1.p1, GGBW01011655.1.p1, GGBW01052074.1.p1, GHLL01108468.1.p1, GHLL01123923.1.p1, GHLL01134597.1.p1, GHLL01218194.1.p1, GHLL01504533.1.p1, Gb_04454, Gb_09558, Gb_29260, Gb_35940…	TnS000097963t03, TnS000119857t02, TnS000137761t02, TnS000149321t03, TnS000189001t03, TnS000197259t06, TnS000197781t03, TnS000212879t01, TnS000285325t01, TnS000285325t02, TnS000358595t02, TnS000400187t12, TnS000400187t13, TnS000400853t01, TnS000729105t09, TnS000739859t05, TnS000762221t02, TnS000774347t01, TnS000780083t01, TnS000785683t09, TnS000815279t06, TnS000875963t02, TnS000882759t01, TnS00093…	Megl_c22856_g1_i1.p1, Megl_c24748_g1_i2.p1, Megl_c24748_g1_i3.p1, Megl_c24748_g2_i2.p1, Megl_c25112_g1_i3.p2, Megl_c28018_g1_i1.p1, Megl_c28018_g1_i1.p2, Megl_c28018_g1_i6.p1, Megl_c28170_g1_i2.p1, Megl_c28464_g1_i1.p1	GCHX01248576.1.p1, GCHX01350633.1.p1, GCZO01209525.1.p1, GCZO01302527.1.p2, GCZO01306961.1.p3, gb|GFBZ01023192.1|.p2, gi|830894813|gb|GCZO01285360.1|.p1, gi|830896538|gb|GCZO01283636.1|.p1, gi|830905041|gb|GCZO01275133.1|.p1, gi|830963579|gb|GCZO01216597.1|.p1	GGJJ01001276.1.p1, GGJJ01004902.1.p1, GGJJ01006171.1.p1, GGJJ01012365.1.p1, GGJJ01013716.1.p1, GGJJ01014555.1.p1, GGJJ01015036.1.p1, GGJJ01015944.1.p1, GGJJ01016425.1.p1, GGJJ01025995.1.p1, GGJJ01026603.1.p1, GGJJ01029149.1.p1, GGJJ01038366.1.p1, GGJJ01044546.1.p1	GDQR01001325.1.p1, GDQR01002200.1.p1, GDQR01003279.1.p1, GDQR01006311.1.p1, GDQR01010401.1.p1, GDQR01014342.1.p1, GFLL01031908.1.p1, GFLL01075502.1.p1, GFLL01090182.1.p1, GFLL01090186.1.p1, GFLL01119438.1.p1, GFLL01136574.1.p1, GFLL01138253.1.p1, gb|GFBO01077730.1|.p1	GGJH01003540.1.p1, GGJH01005218.1.p1, GGJH01005290.1.p1, GGJH01005769.1.p1, GGJH01006191.1.p1, GGJH01006488.1.p1, GGJH01016591.1.p1, GGJH01022219.1.p1, GGJH01026857.1.p1, GGJH01030019.1.p1, GGJH01033044.1.p1, GGJH01044056.1.p1	HAMI01000900.1.p1, HAMI01004655.1.p1, HAMI01007397.1.p1, HAMI01008380.1.p1, HAMI01011377.1.p1, HAMI01016287.1.p1, HAMI01018755.1.p1, HAMI01020099.1.p1, HAMI01025483.1.p1, HAMI01030412.1.p1, HAMI01039039.1.p1	GBLJ01011760.1.p1, GBLJ01020788.1.p1, GBLJ01024613.1.p1, gb|GESU01004258.1|.p1, gb|GESU01006352.1|.p1, gb|GESU01022264.1|.p1, gb|GESU01023760.1|.p1	PILA_03470, PILA_03471, PILA_04964, PILA_04967, PILA_05765, PILA_08211, PILA_12546, PILA_12547, PILA_13125, PILA_13126, PILA_15353, PILA_19121, PILA_22379, PILA_23295, PILA_25053, PILA_26831, PILA_29359, PILA_31703, PILA_34764, PILA_35138, PILA_36324, gb|GEUZ01005887.1|.p1, gb|GEUZ01006727.1|.p1, gb|GEUZ01006781.1|.p1, gb|GEUZ01006794.1|.p1, gb|GEUZ01007086.1|.p1, gb|GEUZ01010516.1|.p1, gb|GEUZ01…	GAQR01004917.1.p3, GAQR01006418.1.p1, GAQR01020808.1.p1, GAQR01026476.1.p1, GAQR01026477.1.p1, GAQR01030688.1.p1, GAQR01034527.1.p1, GAQR01037850.1.p1, GAQR01037852.1.p1, GAQR01042089.1.p1, GAQR01053592.1.p1, GFHB01046391.1.p1, GFHB01110504.1.p1, GFHB01169174.1.p1	GBQX01038673.1.p1, GBQX01040528.1.p1, GBQX01044928.1.p1, GBQX01045811.1.p1, GBQX01047721.1.p1, GDQD01000524.1.p1, GDQD01006540.1.p1, GDQD01007054.1.p1, GDQD01008046.1.p1	GECO01001927.1.p1, GECO01009655.1.p1, GECO01009699.1.p1, GECO01014517.1.p1, GECO01026994.1.p1, GECO01028213.1.p1, GECO01030741.1.p1, GECO01043350.1.p1, GGAU01000834.1.p2, GGAU01001162.1.p1, GGAU01001534.1.p1, GGAU01003812.1.p1, GGAU01004643.1.p3, GGAU01013561.1.p1, GGAU01013648.1.p1, GGAU01023228.1.p2, GGAU01033832.1.p1, GGAU01037322.1.p1, GGAU01040608.1.p4, GGAU01043223.1.p1	GGJK01003198.1.p1, GGJK01004704.1.p1, GGJK01005203.1.p2, GGJK01005583.1.p1, GGJK01014659.1.p1, GGJK01019623.1.p1, GGJK01019757.1.p1, GGJK01020235.1.p1, GGJK01022676.1.p1, GGJK01023462.1.p1, GGJK01024554.1.p1, GGJK01034833.1.p1, GGJK01038938.1.p1, GGJK01041073.1.p1	1A_I11_VO_L_3107_T_22_24_1 C_0.379_Length_2059 type=cds; aalen=541_78%_complete; clen=2059; strand=-; offs=1954-329; evgclass=main_okay_match_1A_I11_VO_L_3107_T_19_24 C_0.345_Length_1580_pct_100_98;, 1A_I3_NT_comp53259_c0_seq10_1 type=cds; aalen=388_88%_complete; clen=1312; strand=-; offs=1206-40; evgclass=main_okay_match_1A_I3_NT_comp53259_c0_seq8_pct_98_95;, 1A_I3_VO_L_1_T_55706_136734_1 C_0.00…	GFZL01000312.1.p1, GFZL01002147.1.p1, GFZL01002806.1.p1, GFZL01002848.1.p1, GFZL01006335.1.p1, GFZL01006336.1.p1, GFZL01017063.1.p1, GFZL01017213.1.p1, GFZL01018436.1.p1, GFZL01022331.1.p1, GFZL01022448.1.p1, GFZL01022449.1.p1	GAZW02007024.1.p1, GAZW02013192.1.p1, GAZW02022777.1.p1, GAZW02022783.1.p1, GAZW02031348.1.p1, GAZW02031351.1.p1, GAZW02033585.1.p1, GAZW02057986.1.p1, GAZW02057989.1.p1, GAZW02057991.1.p1, GAZW02058953.1.p1, GAZW02058954.1.p1, GAZW02062650.1.p1, GAZW02064895.1.p1, GAZW02070760.1.p1, GAZW02070802.1.p2, GAZW02073777.1.p1, GAZW02073778.1.p2, GAZW02073787.1.p1, GAZW02073789.1.p1, GAZW02073796.1.p1, …	Thoc_c24505_g1_i2.p1, Thoc_c24505_g2_i2.p1, Thoc_c26891_g1_i1.p1, Thoc_c27639_g1_i10.p1, Thoc_c27639_g1_i2.p1, Thoc_c28416_g3_i1.p1, Thoc_c28416_g3_i2.p1, Thoc_c402_g1_i1.p1, Thoc_c47090_g1_i1.p1, Thoc_c54701_g1_i1.p1, Thoc_c5597_g1_i2.p1	SEGI_02578, SEGI_05617, SEGI_05781, SEGI_06121, SEGI_06694, SEGI_07386, SEGI_08701, SEGI_09081, SEGI_09555, SEGI_09726, SEGI_10587, SEGI_12511, SEGI_12871, SEGI_20806, SEGI_25789, SEGI_26413, SEGI_27399, SEGI_27603, SEGI_29980, SEGI_32440, SEGI_33507, SEGI_33710, SEGI_35959, SEGI_37717, SEGI_41189	SESE_000871, SESE_001064, SESE_005911, SESE_011333, SESE_013192, SESE_023894, SESE_026522, SESE_027337, SESE_027400, SESE_029214, SESE_030003, SESE_036764, SESE_036819, SESE_038374, SESE_038939, SESE_040033, SESE_042341, SESE_058528, SESE_059229, SESE_060451, SESE_061255, SESE_061499, SESE_061724, SESE_062438, SESE_062551, SESE_063274, SESE_064753, SESE_065130, SESE_065759, SESE_066064, SESE_0688…
OG0000038	GGJG01001522.1.p1, GGJG01007719.1.p1, GGJG01010953.1.p1, GGJG01019647.1.p2, GGJG01020491.1.p1, GGJG01021092.1.p1, GGJG01022924.1.p1	evm_27.model.AmTr_v1.0_scaffold00002.118 pacid=31562508 transcript=evm_27.model.AmTr_v1.0_scaffold00002.118 locus=evm_27.TU.AmTr_v1.0_scaffold00002.118 ID=evm_27.model.AmTr_v1.0_scaffold00002.118.v1.0 annot-version=v1.0, evm_27.model.AmTr_v1.0_scaffold00004.261 pacid=31550382 transcript=evm_27.model.AmTr_v1.0_scaffold00004.261 locus=evm_27.TU.AmTr_v1.0_scaffold00004.261 ID=evm_27.model.AmTr_v1.0_…	GBYR01000110.1.p1, GBYR01048151.1.p1, GBYR01049251.1.p1, GGBW01005957.1.p2, GGBW01011136.1.p1, GGBW01018309.1.p1, GGBW01018734.1.p1, GGBW01020800.1.p1, GGBW01020801.1.p1, GGBW01021887.1.p1, GGBW01026110.1.p2, GGBW01028277.1.p1, GGBW01037340.1.p1, GGBW01038378.1.p1, GGBW01040723.1.p1, GGBW01044293.1.p1, GGBW01051135.1.p1, GHLL01181581.1.p1, GHLL01229495.1.p1, GHLL01540387.1.p1, Gb_30668	TnS000631917t04, TnS000729849t05, TnS000748833t03, TnS000836607t02	Megl_c10761_g2_i1.p1, Megl_c11368_g1_i1.p1, Megl_c18345_g1_i3.p1, Megl_c20949_g1_i1.p1, Megl_c21217_g2_i1.p1, Megl_c24080_g1_i1.p1, Megl_c27949_g2_i6.p1, Megl_c36819_g1_i1.p1, Megl_c6427_g1_i1.p1, Megl_c6759_g2_i1.p1	GCHX01454517.1.p1, GCZO01106143.1.p1, GCZO01207349.1.p1, GCZO01208163.1.p1, GCZO01209973.1.p1, gb|GFBZ01001058.1|.p1, gb|GFBZ01007372.1|.p1, gb|GFBZ01007543.1|.p1, gb|GFBZ01009633.1|.p2, gb|GFBZ01011934.1|.p1, gb|GFBZ01016231.1|.p1, gi|830839005|gb|GCZO01337134.1|.p1, gi|830859397|gb|GCZO01316747.1|.p1, gi|830889371|gb|GCZO01290802.1|.p1, gi|830890471|gb|GCZO01289702.1|.p2, gi|830891433|gb|GCZO01…	GGJJ01001565.1.p1, GGJJ01007884.1.p1, GGJJ01021374.1.p1, GGJJ01021420.1.p1, GGJJ01021421.1.p1, GGJJ01022178.1.p1, GGJJ01022535.1.p1, GGJJ01023117.1.p1, GGJJ01029430.1.p1, GGJJ01030914.1.p1, GGJJ01035289.1.p1, GGJJ01044341.1.p1, GGJJ01044839.1.p1, GGJJ01045281.1.p1, GGJJ01045884.1.p1, GGJJ01056104.1.p1, GGJJ01057023.1.p1	GDQR01010206.1.p1, GDQR01015054.1.p1, GFLL01023230.1.p1, GFLL01046365.1.p1, GFLL01073247.1.p1, GFLL01078777.1.p2, GFLL01094328.1.p1, GFLL01094332.1.p1, GFLL01094436.1.p1, GFLL01098859.1.p1, GFLL01115177.1.p1, GFLL01123642.1.p1, GFLL01125943.1.p1, GFLL01125948.1.p1, GFLL01142018.1.p1, GFLL01142028.1.p1, GFLL01142030.1.p1, GFLL01152128.1.p1, GFLL01168370.1.p1, gb|GFBO01020294.1|.p1, gb|GFBO01023969…	GGJH01007878.1.p1, GGJH01016408.1.p1, GGJH01017538.1.p1, GGJH01017763.1.p1, GGJH01020539.1.p1, GGJH01023817.1.p1, GGJH01029386.1.p1, GGJH01030630.1.p1, GGJH01046927.1.p1	HAMI01007865.1.p2, HAMI01008027.1.p2, HAMI01014665.1.p1, HAMI01028616.1.p1	GBLJ01001614.1.p1, GBLJ01003672.1.p1, GBLJ01003962.1.p1, GBLJ01004399.1.p1, GBLJ01005044.1.p1, GBLJ01010947.1.p1, GBLJ01015239.1.p1, GBLJ01016419.1.p1, GBLJ01017284.1.p1, GBLJ01023411.1.p1, GBLJ01029539.1.p1, GBLJ01035287.1.p1, GBLJ01039418.1.p1, GBLJ01039622.1.p1, GBLJ01040465.1.p1, GBLJ01044467.1.p1, gb|GESU01033868.1|.p1, gb|GESU01042132.1|.p1	PILA_07857, PILA_33028, PILA_36983, gb|GEUZ01010840.1|.p1, gb|GEUZ01013365.1|.p1, gb|GEUZ01014203.1|.p1, gb|GEUZ01015264.1|.p1, gb|GEUZ01016945.1|.p1, gb|GEUZ01017020.1|.p1, gb|GEUZ01017559.1|.p1, gb|GEUZ01018877.1|.p1, gb|GEUZ01019227.1|.p1, gb|GEUZ01020597.1|.p1, gb|GEUZ01020820.1|.p1, gb|GEUZ01022041.1|.p1, gb|GEUZ01023454.1|.p1, gb|GEUZ01024324.1|.p1, gb|GEUZ01024599.1|.p1, gb|GEUZ01026180.1|…	GAQR01010731.1.p1, GAQR01010977.1.p1, GAQR01040460.1.p1, GAQR01040461.1.p2, GAQR01040462.1.p1, GAQR01040470.1.p1, GAQR01040474.1.p1, GAQR01040480.1.p1, GAQR01041807.1.p1, GAQR01058045.1.p1, GFHB01007446.1.p1, GFHB01022451.1.p1, GFHB01037591.1.p1, GFHB01060635.1.p1, GFHB01062035.1.p1, GFHB01080659.1.p1, GFHB01121420.1.p1, GFHB01131307.1.p1, GFHB01161868.1.p1, GFHB01173854.1.p1, GFHB01174873.1.p1	GBQX01020873.1.p1, GBQX01023372.1.p1, GBQX01027922.1.p1, GBQX01033561.1.p1, GBQX01035141.1.p1, GBQX01035227.1.p1, GBQX01036695.1.p1, GBQX01036867.1.p1, GBQX01038618.1.p1, GBQX01039963.1.p1, GBQX01040393.1.p1, GBQX01040792.1.p1, GBQX01041149.1.p1, GBQX01041165.1.p1, GBQX01041301.1.p1, GBQX01045019.1.p1, GBQX01046635.1.p1, GBQX01047288.1.p1, GBQX01048680.1.p1, GBQX01054115.1.p1, GDQD01003748.1.p1, …	GECO01005638.1.p1, GECO01005860.1.p1, GECO01006341.1.p1, GECO01010819.1.p1, GECO01016172.1.p1, GECO01017244.1.p1, GECO01017308.1.p2, GECO01022735.1.p1, GECO01024901.1.p1, GECO01026884.1.p1, GECO01030295.1.p1, GECO01031125.1.p1, GECO01033630.1.p1, GECO01034160.1.p1, GECO01036274.1.p1, GECO01036912.1.p1, GECO01039310.1.p1, GECO01041819.1.p1, GECO01042970.1.p1, GECO01046188.1.p1, GECO01048006.1.p1, …	GGJK01007059.1.p1, GGJK01007792.1.p3, GGJK01016455.1.p1, GGJK01017012.1.p1, GGJK01017323.1.p1, GGJK01017406.1.p1, GGJK01018014.1.p1, GGJK01027778.1.p1, GGJK01028555.1.p1, GGJK01033366.1.p1, GGJK01034135.1.p1, GGJK01036438.1.p1, GGJK01040514.1.p1, GGJK01042806.1.p1, GGJK01043776.1.p1, GGJK01043878.1.p1, GGJK01044740.1.p2, GGJK01044826.1.p1	1A_I5_VO_L_1_T_13147_64687_1 C_0.000_Length_1066 type=cds; aalen=180_50%_complete-utrpoor; clen=1066; strand=-; offs=1052-510; evgclass=main_okay_match_1A_I9_VO_L_1_T_89159_116761 C_0.000_Length_1061_pct_98_100;, 1A_I8_VO_L_3_T_7296_67407_1 C_0.000_Length_1908 type=cds; aalen=320_50%_complete-utrpoor; clen=1908; strand=+; offs=63-1025; evgclass=main_okay_match_6A_all_VO_L_7861_T_464_685 C_0.028_L…	GFZL01000366.1.p1, GFZL01011433.1.p1, GFZL01011574.1.p2, GFZL01012161.1.p1, GFZL01014552.1.p1, GFZL01019888.1.p3, GFZL01019917.1.p1, GFZL01020228.1.p1, GFZL01022797.1.p1, GFZL01024168.1.p1, GFZL01024494.1.p1, GFZL01024724.1.p1, GFZL01024937.1.p1, GFZL01024967.1.p1, GFZL01025346.1.p1, GFZL01025677.1.p2, GFZL01028319.1.p1, GFZL01028365.1.p1	GAZW02008643.1.p1, GAZW02016577.1.p1, GAZW02025140.1.p1, GAZW02046093.1.p1, GAZW02046095.1.p1, GAZW02046101.1.p1, GAZW02049370.1.p1, GAZW02055431.1.p1, GAZW02056241.1.p1, GAZW02056244.1.p1, GAZW02058271.1.p1, GAZW02058273.1.p1, GAZW02059949.1.p1, GAZW02071004.1.p1, GAZW02080149.1.p1, GAZW02084851.1.p1, GAZW02085951.1.p1, GAZW02097948.1.p1, GAZW02098912.1.p1, GAZW02098913.1.p1, GAZW02100611.1.p1, …	Thoc_c18308_g1_i1.p1, Thoc_c19314_g2_i1.p1, Thoc_c239_g1_i1.p1, Thoc_c25052_g1_i1.p1, Thoc_c26088_g2_i1.p1, Thoc_c27046_g1_i1.p2, Thoc_c28508_g1_i1.p1, Thoc_c28778_g1_i6.p1, Thoc_c41047_g1_i1.p1, Thoc_c41085_g1_i1.p2, Thoc_c41085_g1_i1.p3, Thoc_c42117_g1_i1.p1, Thoc_c42189_g1_i1.p1, Thoc_c53192_g1_i1.p1, Thoc_c56918_g1_i1.p1, Thoc_c59408_g1_i1.p1, Thoc_c59694_g1_i1.p1, Thoc_c60050_g1_i1.p1, Thoc_…	SEGI_01543, SEGI_05515, SEGI_10110, SEGI_14200, SEGI_18385, SEGI_32329, SEGI_33853, SEGI_38991, SEGI_41511	SESE_024488, SESE_045498, SESE_085206, SESE_104141, SESE_112253, SESE_125848, SESE_133405, SESE_134396, SESE_136277, SESE_136717, SESE_142069, SESE_144128, SESE_148277
OG0000039	GGJG01018264.1.p1, GGJG01022084.1.p1, GGJG01023567.1.p2, GGJG01024239.1.p1, GGJG01027646.1.p2, GGJG01029275.1.p1, GGJG01036960.1.p1		GBYR01013659.1.p2, GHLL01052098.1.p1, GHLL01081310.1.p2, GHLL01111662.1.p1, GHLL01135623.1.p1, GHLL01476913.1.p1, Gb_03333, Gb_15360, Gb_28324			GCHX01045488.1.p1, GCHX01051684.1.p2, GCHX01052310.1.p1, GCHX01053937.1.p1, GCHX01147212.1.p1, GCHX01245921.1.p1, GCHX01246706.1.p2, GCHX01250743.1.p1, GCHX01254922.1.p1, GCHX01345358.1.p1, GCHX01355110.1.p1, GCHX01448213.1.p1, GCZO01000991.1.p1, GCZO01006726.1.p1, GCZO01006862.1.p1, GCZO01007566.1.p1, GCZO01200243.1.p1, GCZO01301727.1.p1, GCZO01302035.1.p2, GCZO01305841.1.p1, GCZO01308568.1.p1, …	GGJJ01019025.1.p1, GGJJ01031641.1.p2, GGJJ01034390.1.p1, GGJJ01035178.1.p2, GGJJ01039655.1.p1, GGJJ01043402.1.p1, GGJJ01043591.1.p1, GGJJ01046455.1.p1	GDQR01004393.1.p1, GDQR01005111.1.p1, GDQR01011548.1.p1, GDQR01021061.1.p1, GFLL01013165.1.p1, GFLL01022708.1.p1, GFLL01022828.1.p1, GFLL01022938.1.p1, GFLL01047137.1.p1, GFLL01049789.1.p1, GFLL01050294.1.p1, GFLL01051949.1.p1, GFLL01054514.1.p1, GFLL01059991.1.p1, GFLL01061288.1.p1, GFLL01071507.1.p1, GFLL01078471.1.p1, GFLL01083740.1.p1, GFLL01085583.1.p1, GFLL01099254.1.p3, GFLL01141698.1.p1, …	GGJH01019654.1.p1, GGJH01027193.1.p1, GGJH01027281.1.p1, GGJH01032152.1.p1, GGJH01046680.1.p1	HAMI01002710.1.p1, HAMI01011512.1.p1, HAMI01012634.1.p2, HAMI01015417.1.p3, HAMI01016975.1.p1, HAMI01018349.1.p1, HAMI01020705.1.p1, HAMI01027619.1.p1, HAMI01032359.1.p1, HAMI01032971.1.p1, HAMI01040327.1.p1	GBLJ01025414.1.p1, GBLJ01026609.1.p1, GBLJ01042686.1.p1	PILA_01176, PILA_02121, PILA_03042, PILA_03400, PILA_03435, PILA_03824, PILA_04215, PILA_04402, PILA_04632, PILA_04784, PILA_05370, PILA_05396, PILA_05471, PILA_05478, PILA_05644, PILA_05850, PILA_06364, PILA_07223, PILA_07432, PILA_07495, PILA_07512, PILA_07631, PILA_07738, PILA_07772, PILA_08236, PILA_08351, PILA_09105, PILA_09606, PILA_10217, PILA_10288, PILA_10681, PILA_10965, PILA_11428, PIL…	GFHB01004466.1.p1, GFHB01016399.1.p1, GFHB01019161.1.p1, GFHB01022523.1.p1, GFHB01035487.1.p1, GFHB01046218.1.p1, GFHB01060418.1.p1, GFHB01069468.1.p1, GFHB01089517.1.p1, GFHB01128040.1.p1, GFHB01143166.1.p2	GBQX01036234.1.p1, GBQX01037368.1.p1, GBQX01037508.1.p1, GBQX01038103.1.p1, GBQX01039450.1.p1, GBQX01043398.1.p1, GBQX01045107.1.p3, GBQX01045339.1.p1, GBQX01045455.1.p1, GBQX01051457.1.p1, GBQX01051880.1.p1	GECO01000021.1.p1, GECO01000416.1.p1, GECO01001152.1.p1, GECO01001871.1.p1, GECO01005932.1.p1, GECO01006193.1.p1, GECO01020402.1.p1, GECO01023056.1.p1, GECO01041855.1.p1, GECO01044604.1.p1, GECO01048314.1.p1, GGAU01000274.1.p1, GGAU01002316.1.p3, GGAU01003720.1.p1, GGAU01018391.1.p2, GGAU01024067.1.p1, GGAU01037994.1.p2, GGAU01038395.1.p3	GGJK01023356.1.p2, GGJK01024713.1.p2, GGJK01024890.1.p1, GGJK01032507.1.p1, GGJK01039678.1.p1	1A_I3_VO_L_20685_T_5_10_1 C_0.364_Length_617 type=cds; aalen=153_74%_complete; clen=617; strand=-; offs=560-99; evgclass=main_okay_match_1A_I3_VO_L_20685_T_6_10 C_0.364_Length_476_pct_98_99;, 2A_all_NT_comp510024_c0_seq1_1 type=cds; aalen=184_69%_complete; clen=804; strand=-; offs=627-73; evgclass=main_okay_match_2A_all_VO_L_91824_T_1_2 C_0.667_Length_729_pct_99_100;, 2A_all_NT_comp89606_c0_seq2_…	GFZL01001204.1.p1, GFZL01003322.1.p1, GFZL01004257.1.p1, GFZL01015368.1.p1, GFZL01016718.1.p1, GFZL01018628.1.p2, GFZL01018658.1.p1, GFZL01018983.1.p1, GFZL01019349.1.p1, GFZL01019672.1.p1, GFZL01028525.1.p1	GAZW02000190.1.p1, GAZW02001269.1.p1, GAZW02004329.1.p1, GAZW02005135.1.p1, GAZW02005510.1.p1, GAZW02005752.1.p1, GAZW02006180.1.p1, GAZW02006181.1.p1, GAZW02006438.1.p1, GAZW02008139.1.p1, GAZW02008215.1.p1, GAZW02009865.1.p1, GAZW02010370.1.p1, GAZW02010875.1.p1, GAZW02012184.1.p1, GAZW02012744.1.p1, GAZW02014128.1.p1, GAZW02017215.1.p1, GAZW02020390.1.p2, GAZW02026091.1.p1, GAZW02027818.1.p1, …		SEGI_08096, SEGI_11994, SEGI_15806, SEGI_18371, SEGI_26355	SESE_045169, SESE_049136, SESE_049414, SESE_050309, SESE_068784, SESE_071005, SESE_075183, SESE_088358, SESE_110410, SESE_112968, SESE_119622, SESE_133665
OG0000040	GGJG01029278.1.p1, GGJG01029584.1.p1, GGJG01031398.1.p1, GGJG01033958.1.p1, GGJG01042748.1.p1, GGJG01045250.1.p1		GBYR01000846.1.p1, GBYR01038048.1.p1, GBYR01047965.1.p1, GGBW01032418.1.p1, GGBW01032544.1.p1, GGBW01032701.1.p1, GGBW01032722.1.p1, GGBW01032758.1.p1, GGBW01032803.1.p1, GGBW01032846.1.p1, GGBW01032887.1.p1, GGBW01032964.1.p1, GGBW01032975.1.p1, GGBW01032983.1.p1, GGBW01033057.1.p1, GGBW01033114.1.p1, GGBW01033152.1.p1, GGBW01033163.1.p1, GGBW01033339.1.p1, GGBW01033352.1.p1, GGBW01033373.1.p1, …	TnS000075309t10, TnS000396681t01, TnS000420927t06, TnS000497865t01, TnS000894745t01	Megl_c12714_g1_i1.p1, Megl_c17739_g1_i1.p1, Megl_c21333_g1_i1.p1, Megl_c28179_g2_i1.p1, Megl_c28179_g3_i5.p1, Megl_c29826_g1_i1.p1, Megl_c34482_g1_i1.p1, Megl_c35177_g1_i1.p1, Megl_c37140_g1_i1.p1, Megl_c37383_g1_i1.p1	GCHX01352759.1.p1, GCZO01304182.1.p1, gb|GFBZ01000779.1|.p1, gi|830827062|gb|GCZO01349075.1|.p1, gi|830851540|gb|GCZO01324602.1|.p1, gi|830945004|gb|GCZO01235171.1|.p1, gi|830961809|gb|GCZO01218366.1|.p1, gi|830980869|gb|GCZO01199309.1|.p1, gi|831005048|gb|GCZO01175391.1|.p1, gi|831042633|gb|GCZO01137813.1|.p1, gi|831149180|gb|GCZO01031285.1|.p1	GGJJ01004970.1.p1, GGJJ01018512.1.p1, GGJJ01020816.1.p2, GGJJ01024584.1.p1, GGJJ01025683.1.p1, GGJJ01025763.1.p1, GGJJ01027589.1.p1, GGJJ01033761.1.p1, GGJJ01034553.1.p1, GGJJ01036538.1.p1, GGJJ01036684.1.p1, GGJJ01038481.1.p1, GGJJ01045750.1.p1, GGJJ01047585.1.p1, GGJJ01051399.1.p1, GGJJ01053481.1.p1, GGJJ01057290.1.p1	GDQR01002438.1.p2, GDQR01011782.1.p1, GDQR01012792.1.p1, GDQR01020387.1.p1, GFLL01001855.1.p1, GFLL01008042.1.p1, GFLL01017717.1.p1, GFLL01019234.1.p1, GFLL01022058.1.p1, GFLL01022905.1.p1, GFLL01023373.1.p1, GFLL01025859.1.p1, GFLL01039410.1.p1, GFLL01046301.1.p1, GFLL01046302.1.p1, GFLL01048617.1.p1, GFLL01049032.1.p1, GFLL01049410.1.p1, GFLL01049765.1.p1, GFLL01049994.1.p1, GFLL01053995.1.p1, …	GGJH01018820.1.p1, GGJH01019405.1.p1, GGJH01025462.1.p1, GGJH01026209.1.p1, GGJH01029674.1.p1, GGJH01038421.1.p1, GGJH01042885.1.p1, GGJH01044275.1.p1	HAMI01000190.1.p1, HAMI01000398.1.p1, HAMI01005566.1.p1, HAMI01009136.1.p1, HAMI01009250.1.p1, HAMI01011392.1.p1, HAMI01012003.1.p1, HAMI01013778.1.p1, HAMI01015484.1.p1, HAMI01015558.1.p1, HAMI01019438.1.p1, HAMI01020598.1.p1, HAMI01023559.1.p1, HAMI01024955.1.p1, HAMI01026578.1.p1, HAMI01027285.1.p1, HAMI01028388.1.p1, HAMI01030147.1.p1, HAMI01030632.1.p1, HAMI01032558.1.p1, HAMI01034062.1.p1, …	GBLJ01001785.1.p1, GBLJ01004432.1.p1, GBLJ01005221.1.p1, GBLJ01006450.1.p1, GBLJ01008696.1.p1, GBLJ01008872.1.p1, GBLJ01009135.1.p1, GBLJ01009181.1.p1, GBLJ01011812.1.p1, GBLJ01017683.1.p1, GBLJ01018680.1.p1, GBLJ01019105.1.p1, GBLJ01019236.1.p1, GBLJ01024627.1.p1, GBLJ01025972.1.p1, GBLJ01026183.1.p1, GBLJ01030028.1.p1, GBLJ01031503.1.p1, GBLJ01035067.1.p1, GBLJ01036310.1.p1, GBLJ01039612.1.p1	PILA_05481, PILA_27653, gb|GEUZ01008306.1|.p1, gb|GEUZ01016174.1|.p1, gb|GEUZ01018176.1|.p1, gb|GEUZ01020461.1|.p1, gb|GEUZ01021045.1|.p1, gb|GEUZ01021604.1|.p1, gb|GEUZ01021606.1|.p1, gb|GEUZ01021907.1|.p1, gb|GEUZ01022010.1|.p1, gb|GEUZ01022902.1|.p1, gb|GEUZ01023813.1|.p1, gb|GEUZ01024741.1|.p1, gb|GEUZ01024766.1|.p1, gb|GEUZ01025475.1|.p1, gb|GEUZ01031721.1|.p1	GAQR01000220.1.p1, GAQR01000977.1.p1, GAQR01006410.1.p2, GAQR01008824.1.p1, GAQR01031491.1.p1, GAQR01041239.1.p1, GAQR01043719.1.p1, GAQR01051249.1.p1, GAQR01052379.1.p1, GAQR01053407.1.p1, GAQR01053593.1.p1, GAQR01053666.1.p1, GAQR01054819.1.p1, GAQR01055428.1.p1, GAQR01056188.1.p1, GFHB01000963.1.p1, GFHB01005219.1.p1, GFHB01013659.1.p1, GFHB01015629.1.p1, GFHB01017479.1.p1, GFHB01022435.1.p1, …	GBQX01024002.1.p1, GBQX01032794.1.p1, GBQX01039697.1.p1, GBQX01046335.1.p1	GECO01006275.1.p1, GECO01008552.1.p1, GECO01013842.1.p1, GECO01015422.1.p1, GECO01017085.1.p1, GECO01018627.1.p1, GECO01023174.1.p1, GECO01024256.1.p1, GECO01029477.1.p1, GECO01031203.1.p1, GECO01048703.1.p1, GECO01049267.1.p1, GGAU01048912.1.p1	GGJK01023937.1.p1, GGJK01025115.1.p1, GGJK01026948.1.p1, GGJK01029908.1.p1, GGJK01037000.1.p1, GGJK01037217.1.p1, GGJK01038040.1.p1, GGJK01038115.1.p1, GGJK01039133.1.p1, GGJK01039256.1.p1, GGJK01040179.1.p1, GGJK01040902.1.p1, GGJK01041341.1.p1, GGJK01044571.1.p1, GGJK01045256.1.p1	2A_all_VO_L_16750_T_36_37_1 C_0.108_Length_2767 type=cds; aalen=369_40%_complete-utrbad; clen=2767; strand=+; offs=334-1443; evgclass=main_okay_match_3A_all_VO_L_4_T_25830_60622 C_0.000_Length_1468_pct_99_70;, 2A_all_VO_L_1_T_80073_181832_1 C_0.000_Length_3053 type=cds; aalen=940_92%_complete; clen=3053; strand=+; offs=106-2928; evgclass=main_okay_match_3A_all_VO_L_4_T_8041_60622 C_0.000_Length_1…	GFZL01012670.1.p1, GFZL01015866.1.p1, GFZL01020947.1.p1, GFZL01025051.1.p1, GFZL01027280.1.p1	GAZW02005265.1.p1, GAZW02007530.1.p1, GAZW02008186.1.p1, GAZW02010804.1.p1, GAZW02012166.1.p1, GAZW02020402.1.p1, GAZW02029435.1.p1, GAZW02035419.1.p1, GAZW02036169.1.p1, GAZW02036171.1.p1, GAZW02037585.1.p1, GAZW02039980.1.p1, GAZW02040370.1.p1, GAZW02042643.1.p1, GAZW02043908.1.p1, GAZW02044643.1.p1, GAZW02044644.1.p1, GAZW02046619.1.p1, GAZW02065926.1.p1, GAZW02072132.1.p1, GAZW02072134.1.p1, …	Thoc_c10552_g1_i2.p1, Thoc_c18135_g2_i1.p1, Thoc_c20846_g1_i1.p1, Thoc_c21559_g3_i1.p1, Thoc_c21866_g2_i1.p1, Thoc_c22499_g1_i3.p1, Thoc_c22624_g1_i1.p1, Thoc_c23205_g2_i1.p1, Thoc_c26335_g2_i2.p1, Thoc_c29088_g4_i1.p1, Thoc_c30759_g1_i1.p1, Thoc_c31249_g1_i1.p1, Thoc_c35466_g1_i1.p1, Thoc_c42286_g1_i1.p1, Thoc_c43763_g1_i1.p1, Thoc_c47967_g1_i1.p2, Thoc_c55511_g1_i1.p1, Thoc_c55516_g1_i1.p1, Tho…	SEGI_02329, SEGI_02454, SEGI_03350, SEGI_06549, SEGI_08429, SEGI_09613, SEGI_09817, SEGI_11665, SEGI_12919, SEGI_14960, SEGI_17349, SEGI_18334, SEGI_23451, SEGI_23868, SEGI_24525, SEGI_28181, SEGI_31175, SEGI_32068, SEGI_38931, SEGI_39953, SEGI_40125, SEGI_40464, SEGI_40970, SEGI_41132, SEGI_41609	SESE_050995, SESE_051414, SESE_127804, SESE_128608, SESE_129949, SESE_131108, SESE_131902, SESE_132232, SESE_133249, SESE_134068, SESE_134921, SESE_136263, SESE_136738, SESE_142794, SESE_143939, SESE_144349, SESE_147850, SESE_149206
OG0000041						GCHX01051301.1.p1, GCHX01147304.1.p1, GCHX01149696.1.p1, GCHX01151946.1.p1, GCHX01152868.1.p1, GCHX01246278.1.p1, GCHX01248011.1.p1, GCHX01452935.1.p1, GCZO01308832.1.p1, gb|GFBZ01003964.1|.p1, gb|GFBZ01008368.1|.p1, gb|GFBZ01008705.1|.p1, gb|GFBZ01012255.1|.p1, gb|GFBZ01015076.1|.p1, gb|GFBZ01021413.1|.p1, gb|GFBZ01021546.1|.p1, gb|GFBZ01021709.1|.p1, gb|GFBZ01022202.1|.p1, gb|GFBZ01023025.1|.p1…	GGJJ01041273.1.p1, GGJJ01052901.1.p1, GGJJ01054702.1.p1	GFLL01011632.1.p1, GFLL01023046.1.p1, GFLL01038609.1.p1, GFLL01051993.1.p1, GFLL01069270.1.p1, GFLL01069271.1.p1, GFLL01076669.1.p1, GFLL01076673.1.p1, GFLL01084152.1.p1, GFLL01084153.1.p1, GFLL01106492.1.p1, GFLL01111224.1.p1, GFLL01120718.1.p1, GFLL01120719.1.p1, GFLL01130095.1.p2, GFLL01130099.1.p1, GFLL01152425.1.p1, GFLL01155051.1.p1, GFLL01155383.1.p1, GFLL01163912.1.p1, GFLL01181659.1.p2, …	GGJH01019754.1.p1, GGJH01020956.1.p1, GGJH01046101.1.p1		GBLJ01021941.1.p1, gb|GESU01026597.1|.p1	PILA_01783, PILA_02378, PILA_02523, PILA_02962, PILA_03832, PILA_04115, PILA_04357, PILA_04461, PILA_04563, PILA_05710, PILA_06244, PILA_07909, PILA_09046, PILA_09074, PILA_09374, PILA_10465, PILA_10695, PILA_10940, PILA_11043, PILA_11533, PILA_11825, PILA_12045, PILA_12071, PILA_12113, PILA_12864, PILA_14550, PILA_15569, PILA_15832, PILA_16164, PILA_16308, PILA_16730, PILA_17071, PILA_17079, PIL…	GFHB01028179.1.p1, GFHB01058456.1.p1, GFHB01100780.1.p1, GFHB01146062.1.p2, GFHB01177536.1.p1	GBQX01030699.1.p1, GBQX01036861.1.p1, GBQX01042514.1.p1, GBQX01046926.1.p1, GBQX01052336.1.p1	GECO01003190.1.p1, GECO01003954.1.p1, GECO01011541.1.p1, GECO01012301.1.p1, GECO01012339.1.p1, GECO01019603.1.p1, GECO01027718.1.p1, GECO01033761.1.p1, GECO01037816.1.p1, GECO01039398.1.p1, GECO01039809.1.p1, GECO01040061.1.p1, GECO01042524.1.p1, GECO01046065.1.p1, GECO01048498.1.p1	GGJK01018732.1.p1, GGJK01031143.1.p1, GGJK01035860.1.p1, GGJK01038500.1.p1	1A_all_VO_L_13702_T_34_39_1 C_0.097_Length_1119 type=cds; aalen=367_98%_complete; clen=1119; strand=+; offs=2-1105; evgclass=main_okay_match_3A_all_VO_L_698_T_691_957 C_0.002_Length_1002_pct_99_100;, 1A_all_VO_L_18411_T_3_4_1 C_0.167_Length_1619 type=cds; aalen=221_41%_complete-utrbad; clen=1619; strand=+; offs=43-708; evgclass=main_okay_match_1A_all_OT_comp98643_c0_seq1_pct_99_100;, 2A_all_VO_L_…		GAZW02002805.1.p1, GAZW02007943.1.p1, GAZW02009717.1.p1, GAZW02011721.1.p1, GAZW02020183.1.p1, GAZW02032197.1.p1, GAZW02051264.1.p1, GAZW02096998.1.p1, GAZW02103809.1.p1, GFFY01015476.1.p2, GFFY01029444.1.p1, GFFY01035498.1.p1, GFFY01047225.1.p1, GFFY01050012.1.p1, GFFY01062820.1.p1, GFFY01065577.1.p1, GFFY01071019.1.p1, GFFY01087034.1.p1, GFFY01103541.1.p1, GFFY01176265.1.p1, PSME_00973, PSME_01…	Thoc_c7166_g1_i1.p1	SEGI_00377, SEGI_00576, SEGI_00608, SEGI_03124, SEGI_06395, SEGI_08314, SEGI_09026, SEGI_09592, SEGI_10798, SEGI_12396, SEGI_12822, SEGI_14084, SEGI_17260, SEGI_21058, SEGI_21525, SEGI_21884, SEGI_22968, SEGI_26231, SEGI_27221, SEGI_29451, SEGI_31040, SEGI_33789, SEGI_36219, SEGI_38596, SEGI_40689	SESE_028848, SESE_029633, SESE_032892, SESE_034240, SESE_036062, SESE_036984, SESE_042752, SESE_044568, SESE_048335, SESE_051358, SESE_051856, SESE_054067, SESE_057624, SESE_059606, SESE_063288, SESE_066675, SESE_067261, SESE_067782, SESE_067846, SESE_068190, SESE_068291, SESE_068508, SESE_071045, SESE_075101, SESE_075669, SESE_079643, SESE_081111, SESE_081324, SESE_081445, SESE_081706, SESE_0877…
OG0000042	GGJG01025312.1.p1, GGJG01027724.1.p1, GGJG01038031.1.p1	evm_27.model.AmTr_v1.0_scaffold00013.82 pacid=31550749 transcript=evm_27.model.AmTr_v1.0_scaffold00013.82 locus=evm_27.TU.AmTr_v1.0_scaffold00013.82 ID=evm_27.model.AmTr_v1.0_scaffold00013.82.v1.0 annot-version=v1.0	GBYR01049450.1.p1, GHLL01428872.1.p1, GHLL01503896.1.p1, GHLL01660108.1.p2, Gb_12932, Gb_14385, Gb_19845, Gb_28853			GCHX01045876.1.p1, GCHX01050549.1.p1, GCHX01249748.1.p1, GCHX01251504.1.p1, GCHX01455077.1.p1, GCZO01205160.1.p1, GCZO01300498.1.p1, gb|GFBZ01008463.1|.p1, gb|GFBZ01014681.1|.p1, gb|GFBZ01017681.1|.p2, gi|830906793|gb|GCZO01273381.1|.p2, gi|830990547|gb|GCZO01189634.1|.p1, gi|831008372|gb|GCZO01172067.1|.p2, gi|831045749|gb|GCZO01134697.1|.p1, gi|831055121|gb|GCZO01125326.1|.p1, gi|831099466|gb|G…	GGJJ01005725.1.p1, GGJJ01045056.1.p1	GDQR01001259.1.p1, GDQR01005785.1.p1, GDQR01013272.1.p1, GFLL01046815.1.p1, GFLL01053076.1.p1, GFLL01094413.1.p1, GFLL01154420.1.p1, gb|GFBO01003728.1|.p1, gb|GFBO01034839.1|.p1, gb|GFBO01054620.1|.p1, gb|GFBO01054621.1|.p1	GGJH01005644.1.p1, GGJH01034298.1.p1	HAMI01024574.1.p1, HAMI01039067.1.p1, HAMI01039822.1.p2	GBLJ01005479.1.p1, GBLJ01011510.1.p1, GBLJ01018910.1.p1, GBLJ01031434.1.p1, GBLJ01040599.1.p1, GBLJ01041645.1.p1, gb|GESU01031076.1|.p1	PILA_00195, PILA_00405, PILA_00496, PILA_00683, PILA_01845, PILA_03299, PILA_06368, PILA_06656, PILA_06962, PILA_07054, PILA_10606, PILA_11282, PILA_11550, PILA_11603, PILA_11850, PILA_11955, PILA_12171, PILA_12682, PILA_13332, PILA_14628, PILA_15195, PILA_15571, PILA_18022, PILA_20182, PILA_20539, PILA_20941, PILA_21101, PILA_21382, PILA_22698, PILA_22708, PILA_24146, PILA_25469, PILA_25484, PIL…	GAQR01008358.1.p1, GAQR01013470.1.p1, GAQR01026523.1.p1, GAQR01026524.1.p1, GAQR01044934.1.p1, GAQR01047518.1.p1, GAQR01054011.1.p1, GAQR01063779.1.p1, GFHB01006925.1.p1, GFHB01019491.1.p1, GFHB01029343.1.p1, GFHB01031775.1.p1, GFHB01064617.1.p1, GFHB01104866.1.p1, GFHB01158921.1.p1, GFHB01185994.1.p1	GBQX01029275.1.p1, GBQX01036383.1.p1, GBQX01037164.1.p1, GBQX01038195.1.p1, GBQX01041026.1.p1, GBQX01042324.1.p1, GBQX01043211.1.p1, GBQX01051064.1.p1	GECO01006022.1.p1, GECO01006433.1.p1, GECO01007225.1.p1, GECO01008462.1.p1, GECO01011467.1.p1, GECO01046833.1.p1, GGAU01022568.1.p2, GGAU01044584.1.p1	GGJK01019236.1.p1, GGJK01019929.1.p1, GGJK01031668.1.p1, GGJK01042772.1.p1	5A_all_NT_comp55549_c0_seq1_1 type=cds; aalen=153_65%_complete; clen=701; strand=+; offs=13-474; evgclass=main_okay_match_5A_I7_VO_L_35855_T_1_2 C_0.333_Length_437_pct_99_97;, 5A_all_VO_L_36623_T_7_7_1 C_0.000_Length_1006 type=cds; aalen=277_82%_complete; clen=1006; strand=-; offs=953-120; evgclass=main_okay_match_5A_I16_NT_comp389093_c0_seq1_pct_100_94;, 6A_all_VO_L_20549_T_3_6_1 C_0.600_Length_…	GFZL01010255.1.p1, GFZL01021740.1.p1, GFZL01026022.1.p1	GAZW02004373.1.p1, GAZW02035855.1.p2, GAZW02057211.1.p1, GFFY01022121.1.p1, GFFY01051358.1.p1, PSME_01510, PSME_02477, PSME_02715, PSME_02842, PSME_02943, PSME_02961, PSME_03063, PSME_03347, PSME_03721, PSME_03783, PSME_03915, PSME_05306, PSME_05481, PSME_05732, PSME_07020, PSME_08479, PSME_10218, PSME_10236, PSME_11260, PSME_11645, PSME_13733, PSME_13787, PSME_15789, PSME_16142, PSME_16645, PSME…	Thoc_c11098_g1_i1.p1	SEGI_11221, SEGI_12233, SEGI_16084, SEGI_24379, SEGI_25042, SEGI_26580, SEGI_36742, SEGI_37320	SESE_032735, SESE_039940, SESE_041946, SESE_042550, SESE_046515, SESE_051925, SESE_054268, SESE_064491, SESE_067684, SESE_071108, SESE_072176, SESE_074513, SESE_090032, SESE_107580, SESE_111792, SESE_137642, SESE_137907, SESE_138162, SESE_140473, SESE_140573, SESE_141595, SESE_143934, SESE_148792
OG0000043	GGJG01007453.1.p1, GGJG01026670.1.p1, GGJG01034242.1.p1		GBYR01001197.1.p1, GBYR01001686.1.p1, GGBW01019457.1.p1, GGBW01052482.1.p1, GHLL01038019.1.p1, GHLL01047245.1.p1, GHLL01099829.1.p1, GHLL01129272.1.p1, GHLL01180846.1.p3, GHLL01252247.1.p1, GHLL01438861.1.p1, GHLL01598018.1.p1, Gb_36643			GCHX01045630.1.p1, GCHX01050778.1.p1, GCHX01053483.1.p1, GCHX01053968.1.p1, GCHX01054406.1.p1, GCHX01245603.1.p2, GCHX01249829.1.p1, GCHX01250126.1.p2, GCHX01250558.1.p1, GCHX01250768.1.p1, GCHX01252395.1.p1, GCHX01253418.1.p1, GCHX01349559.1.p1, GCHX01353088.1.p1, GCZO01004169.1.p1, GCZO01005888.1.p1, GCZO01105152.1.p1, GCZO01203983.1.p1, GCZO01204857.1.p1, gb|GFBZ01012867.1|.p1, gb|GFBZ01014397…	GGJJ01012039.1.p1, GGJJ01028187.1.p1, GGJJ01041820.1.p1, GGJJ01043364.1.p1, GGJJ01044452.1.p1	GDQR01003326.1.p1, GFLL01017064.1.p1, GFLL01021093.1.p1, GFLL01027134.1.p1, GFLL01031359.1.p1, GFLL01033565.1.p2, GFLL01040125.1.p1, GFLL01040548.1.p1, GFLL01046344.1.p1, GFLL01050540.1.p1, GFLL01082789.1.p1, GFLL01116296.1.p1, GFLL01124542.1.p2, GFLL01142938.1.p1, GFLL01183003.1.p1, GFLL01184820.1.p1	GGJH01018469.1.p1	HAMI01011316.1.p1, HAMI01016548.1.p1, HAMI01029357.1.p1, HAMI01031405.1.p1, HAMI01034267.1.p1	GBLJ01013902.1.p1, GBLJ01035522.1.p1, gb|GESU01016037.1|.p1, gb|GESU01022405.1|.p1, gb|GESU01029130.1|.p1, gb|GESU01030038.1|.p1	PILA_01781, PILA_01842, PILA_02444, PILA_20545, PILA_24018, PILA_25639, PILA_27254, PILA_29399, PILA_37824, PILA_38201, gb|GEUZ01014175.1|.p1, gb|GEUZ01016049.1|.p1, gb|GEUZ01016615.1|.p1, gb|GEUZ01017354.1|.p1, gb|GEUZ01017551.1|.p1, gb|GEUZ01018769.1|.p1, gb|GEUZ01019056.1|.p1, gb|GEUZ01019240.1|.p1, gb|GEUZ01019523.1|.p1, gb|GEUZ01019707.1|.p1, gb|GEUZ01021150.1|.p1, gb|GEUZ01021310.1|.p1, gb|…	GFHB01067561.1.p1, GFHB01105735.1.p1	GDQD01009098.1.p1	GECO01000609.1.p1, GECO01005748.1.p1, GECO01010654.1.p1, GGAU01037713.1.p2, GGAU01038671.1.p3, GGAU01051625.1.p2	GGJK01039916.1.p1, GGJK01042107.1.p1	2A_all_VO_L_5380_T_371_920_1 C_0.005_Length_1689 type=cds; aalen=250_44%_complete-utrpoor; clen=1689; strand=-; offs=1266-514; evgclass=main_okay_match_2A_all_VO_L_5380_T_362_920 C_0.003_Length_598_pct_99_98;, 2A_all_VO_L_6039_T_39_95_1 C_0.102_Length_5849 type=cds; aalen=248_12%_complete-utrbad; clen=5849; strand=-; offs=3045-2299; evgclass=maina2_okay_match_2A_I13_VO_L_3610_T_2_16 C_0.067_Lengt…	GFZL01011284.1.p2, GFZL01013906.1.p1, GFZL01015430.1.p1, GFZL01015607.1.p1, GFZL01019306.1.p1, GFZL01019388.1.p1, GFZL01019640.1.p1, GFZL01026133.1.p1, GFZL01027516.1.p1	GAZW02000351.1.p1, GAZW02001511.1.p1, GAZW02002126.1.p1, GAZW02004097.1.p1, GAZW02004557.1.p1, GAZW02005298.1.p1, GAZW02020382.1.p1, GAZW02031587.1.p1, GAZW02058765.1.p1, GAZW02084820.1.p1, GAZW02103240.1.p1, GFFY01024969.1.p1, GFFY01028721.1.p1, GFFY01035429.1.p1, GFFY01046285.1.p1, GFFY01054725.1.p1, GFFY01055864.1.p1, GFFY01057598.1.p1, GFFY01059171.1.p1, GFFY01072945.1.p1, GFFY01083940.1.p1, …	Thoc_c16012_g1_i1.p1, Thoc_c16012_g2_i1.p1, Thoc_c36056_g1_i1.p1	SEGI_05567, SEGI_08857, SEGI_16028, SEGI_18804, SEGI_22740, SEGI_27285, SEGI_27455, SEGI_29417, SEGI_30497, SEGI_31582, SEGI_37117, SEGI_37220, SEGI_40651	SESE_004088, SESE_018603, SESE_025553, SESE_025913, SESE_026344, SESE_026489, SESE_026582, SESE_026703, SESE_026752, SESE_027007, SESE_027730, SESE_028444, SESE_028610, SESE_028670, SESE_028802, SESE_030278, SESE_030404, SESE_031137, SESE_031176, SESE_031193, SESE_031306, SESE_031529, SESE_031675, SESE_031832, SESE_032310, SESE_032587, SESE_033209, SESE_033742, SESE_033889, SESE_034036, SESE_0341…
OG0000044	GGJG01020292.1.p1, GGJG01022779.1.p1, GGJG01023819.1.p1, GGJG01030626.1.p1, GGJG01031814.1.p1	evm_27.model.AmTr_v1.0_scaffold00013.29 pacid=31550847 transcript=evm_27.model.AmTr_v1.0_scaffold00013.29 locus=evm_27.TU.AmTr_v1.0_scaffold00013.29 ID=evm_27.model.AmTr_v1.0_scaffold00013.29.v1.0 annot-version=v1.0, evm_27.model.AmTr_v1.0_scaffold00016.325 pacid=31569733 transcript=evm_27.model.AmTr_v1.0_scaffold00016.325 locus=evm_27.TU.AmTr_v1.0_scaffold00016.325 ID=evm_27.model.AmTr_v1.0_scaf…	GBYR01034511.1.p1, GGBW01009764.1.p1, GGBW01013828.1.p1, GGBW01024194.1.p2, GGBW01024934.1.p1, GHLL01063395.1.p1, GHLL01256584.1.p1, GHLL01256585.1.p1, GHLL01362821.1.p1, GHLL01548703.1.p1, Gb_00877, Gb_06307, Gb_20052, Gb_24807, Gb_27805, Gb_36109	TnS000027131t04, TnS000027131t05, TnS000060573t09, TnS000350253t03, TnS000350253t04, TnS000440287t04, TnS000678907t03	Megl_c16028_g1_i1.p1, Megl_c16028_g1_i1.p2, Megl_c17189_g3_i1.p1, Megl_c24558_g2_i1.p1, Megl_c24558_g3_i1.p1, Megl_c24558_g4_i1.p1, Megl_c25739_g1_i2.p1, Megl_c25739_g2_i1.p1, Megl_c27974_g1_i2.p1	GCHX01053598.1.p1, GCHX01151135.1.p1, GCHX01246756.1.p1, GCHX01254928.1.p1, gi|830837932|gb|GCZO01338207.1|.p1, gi|830914381|gb|GCZO01265793.1|.p1, gi|830937512|gb|GCZO01242662.1|.p1, gi|831005727|gb|GCZO01174712.1|.p1, gi|831018898|gb|GCZO01161545.1|.p1, gi|831044763|gb|GCZO01135683.1|.p1, gi|831049576|gb|GCZO01130871.1|.p1, gi|831103977|gb|GCZO01076482.1|.p1, gi|831130797|gb|GCZO01049667.1|.p1,…	GGJJ01000182.1.p1, GGJJ01009458.1.p1, GGJJ01015143.1.p1, GGJJ01022937.1.p1, GGJJ01023214.1.p1, GGJJ01029118.1.p1, GGJJ01029119.1.p1, GGJJ01034747.1.p1, GGJJ01040373.1.p1, GGJJ01052919.1.p1	GDQR01000940.1.p1, GDQR01002691.1.p1, GDQR01006569.1.p1, GFLL01018990.1.p1, GFLL01059110.1.p1, GFLL01073931.1.p1, GFLL01083385.1.p1, GFLL01100932.1.p1, GFLL01100935.1.p1, GFLL01100944.1.p1, GFLL01119525.1.p1, GFLL01119530.1.p1, GFLL01125073.1.p1, GFLL01125074.1.p1, GFLL01125075.1.p1, GFLL01130160.1.p1, GFLL01130162.1.p1, GFLL01130163.1.p1, GFLL01130168.1.p1, gb|GFBO01027489.1|.p1	GGJH01008935.1.p1, GGJH01015599.1.p1, GGJH01021063.1.p1, GGJH01046613.1.p1	HAMI01006878.1.p1, HAMI01007667.1.p1, HAMI01012124.1.p1, HAMI01014682.1.p1, HAMI01015337.1.p1, HAMI01016007.1.p1, HAMI01017334.1.p1, HAMI01023770.1.p1, HAMI01029200.1.p1, HAMI01033429.1.p1, HAMI01035052.1.p1	GBLJ01005437.1.p1, GBLJ01017221.1.p1, GBLJ01024393.1.p1, GBLJ01046214.1.p1, gb|GESU01003313.1|.p1, gb|GESU01018875.1|.p1, gb|GESU01021865.1|.p1, gb|GESU01038128.1|.p1	PILA_07924, PILA_15854, PILA_19635, PILA_20579, PILA_29093, PILA_30487, PILA_34891, gb|GEUZ01004901.1|.p1, gb|GEUZ01005056.1|.p1, gb|GEUZ01005388.1|.p1, gb|GEUZ01005571.1|.p1, gb|GEUZ01005953.1|.p1, gb|GEUZ01006436.1|.p1, gb|GEUZ01006549.1|.p1, gb|GEUZ01006782.1|.p1, gb|GEUZ01007144.1|.p1, gb|GEUZ01007350.1|.p1, gb|GEUZ01007654.1|.p1, gb|GEUZ01008073.1|.p1, gb|GEUZ01008160.1|.p1, gb|GEUZ01008373.…	GAQR01001123.1.p1, GAQR01006917.1.p1, GAQR01019278.1.p1, GAQR01019280.1.p1, GAQR01022411.1.p1, GAQR01026103.1.p1, GAQR01033899.1.p1, GAQR01037644.1.p1, GAQR01054074.1.p1, GFHB01011762.1.p1, GFHB01026061.1.p1, GFHB01050720.1.p1, GFHB01122154.1.p1, GFHB01143011.1.p1, GFHB01154170.1.p1	GBQX01028274.1.p1, GBQX01037506.1.p1, GBQX01040900.1.p1, GBQX01042706.1.p1, GBQX01044929.1.p1, GBQX01045882.1.p1, GBQX01046363.1.p1, GDQD01001539.1.p1, GDQD01001540.1.p1, GDQD01009274.1.p1, GDQD01009275.1.p1, GDQD01009574.1.p1	GECO01003488.1.p1, GECO01005688.1.p1, GECO01011010.1.p1, GECO01012074.1.p1, GECO01014357.1.p1, GECO01014647.1.p1, GECO01019167.1.p1, GECO01019969.1.p1, GECO01024376.1.p1, GECO01024800.1.p1, GECO01027923.1.p1, GECO01030084.1.p1, GECO01031173.1.p1, GECO01031927.1.p1, GECO01049827.1.p1, GECO01050095.1.p1, GECO01051341.1.p1, GECO01051375.1.p1, GECO01051478.1.p1, GECO01051682.1.p1, GGAU01002825.1.p1, …	GGJK01008044.1.p1, GGJK01014740.1.p1, GGJK01015030.1.p1, GGJK01018343.1.p1, GGJK01019153.1.p1, GGJK01022537.1.p1, GGJK01025648.1.p1, GGJK01026667.1.p1, GGJK01030394.1.p1, GGJK01033749.1.p1, GGJK01041983.1.p1	1A_I11_VO_L_1154_T_30_89_1 C_0.108_Length_2180 type=cds; aalen=594_81%_complete; clen=2180; strand=-; offs=2147-363; evgclass=main_okay_match_1A_I11_VO_L_1154_T_32_89 C_0.108_Length_2171_pct_99_100;, 1A_I11_VO_L_1_T_39104_226447_1 C_0.000_Length_1913 type=cds; aalen=515_80%_complete; clen=1913; strand=-; offs=1739-192; evgclass=main_okay_match_6A_I23_NT_comp39802_c0_seq1_pct_98_99;, 1A_all_NT_com…	GFZL01000073.1.p1, GFZL01000793.1.p1, GFZL01004024.1.p1, GFZL01005837.1.p1, GFZL01008309.1.p1, GFZL01008442.1.p1, GFZL01009613.1.p1, GFZL01013023.1.p1, GFZL01014464.1.p1, GFZL01014577.1.p1, GFZL01019416.1.p1, GFZL01020433.1.p1, GFZL01022142.1.p1, GFZL01023733.1.p1, GFZL01024197.1.p1, GFZL01025131.1.p1, GFZL01025195.1.p1, GFZL01025196.1.p1, GFZL01025353.1.p1, GFZL01025512.1.p1, GFZL01025955.1.p1, …	GAZW02003368.1.p1, GAZW02054554.1.p1, GAZW02054557.1.p1, GAZW02070033.1.p1, GAZW02070035.1.p1, GAZW02070043.1.p1, GAZW02070045.1.p1, GAZW02076565.1.p1, GAZW02076569.1.p1, GAZW02090951.1.p1, GAZW02090952.1.p1, GAZW02103469.1.p1, GFFY01007166.1.p1, GFFY01011407.1.p1, GFFY01012071.1.p1, GFFY01014441.1.p1, GFFY01015916.1.p1, GFFY01017703.1.p1, GFFY01023852.1.p1, GFFY01025383.1.p1, GFFY01037668.1.p1, …	Thoc_c12322_g1_i1.p1, Thoc_c18866_g1_i1.p1, Thoc_c21022_g1_i1.p1, Thoc_c27461_g1_i4.p1, Thoc_c9135_g1_i1.p1	SEGI_00663, SEGI_19629, SEGI_32188	SESE_044660, SESE_051245, SESE_073565, SESE_075740, SESE_082560, SESE_093396, SESE_100899, SESE_102478, SESE_109726, SESE_120146, SESE_124384, SESE_125273, SESE_125433, SESE_125472, SESE_125581, SESE_126423, SESE_126426, SESE_126836, SESE_127193, SESE_127386, SESE_127507, SESE_127692, SESE_128065, SESE_128175, SESE_128824, SESE_129843, SESE_131220, SESE_131488, SESE_131803, SESE_132297, SESE_1328…
OG0000045	GGJG01024726.1.p2, GGJG01034345.1.p1, GGJG01040016.1.p3	evm_27.model.AmTr_v1.0_scaffold00055.98 pacid=31571712 transcript=evm_27.model.AmTr_v1.0_scaffold00055.98 locus=evm_27.TU.AmTr_v1.0_scaffold00055.98 ID=evm_27.model.AmTr_v1.0_scaffold00055.98.v1.0 annot-version=v1.0	GBYR01058061.1.p1, GGBW01005194.1.p2, GGBW01018545.1.p1, GGBW01024037.1.p1, GGBW01032296.1.p1, GHLL01013571.1.p1, GHLL01018526.1.p1, GHLL01071578.1.p2, GHLL01071579.1.p1, GHLL01099395.1.p1, GHLL01137449.1.p1, GHLL01137450.1.p1, GHLL01137451.1.p1, GHLL01146900.1.p1, GHLL01154615.1.p1, GHLL01202272.1.p1, GHLL01207735.1.p1, GHLL01224346.1.p1, GHLL01224347.1.p2, GHLL01224351.1.p1, GHLL01245722.1.p1, …			GCHX01150095.1.p1, GCHX01150329.1.p1, GCHX01249347.1.p1, GCZO01000233.1.p1, GCZO01004476.1.p1, GCZO01004972.1.p1, GCZO01006478.1.p1, GCZO01102004.1.p1, GCZO01109200.1.p1, gb|GFBZ01011556.1|.p1, gb|GFBZ01013713.1|.p1, gb|GFBZ01016406.1|.p2, gb|GFBZ01021757.1|.p1, gb|GFBZ01022303.1|.p1, gb|GFBZ01024354.1|.p1, gi|830935078|gb|GCZO01245096.1|.p1, gi|830981336|gb|GCZO01198842.1|.p1, gi|831004103|gb|GC…	GGJJ01026326.1.p1, GGJJ01053624.1.p1	GDQR01011246.1.p1, GFLL01000356.1.p1, GFLL01025368.1.p1, GFLL01025444.1.p1, GFLL01043513.1.p1, GFLL01052179.1.p1, GFLL01079691.1.p1, GFLL01115214.1.p1, GFLL01148520.1.p1, GFLL01161392.1.p1, GFLL01174907.1.p1, gb|GFBO01043212.1|.p2, gb|GFBO01077288.1|.p1	GGJH01031029.1.p1, GGJH01040101.1.p1	HAMI01000430.1.p1, HAMI01014356.1.p1, HAMI01019370.1.p1, HAMI01028081.1.p1, HAMI01029974.1.p1, HAMI01039545.1.p1	GBLJ01003808.1.p1, GBLJ01003896.1.p1, GBLJ01006656.1.p1, GBLJ01014916.1.p1, GBLJ01031320.1.p1, GBLJ01033104.1.p1, GBLJ01038583.1.p1, GBLJ01040415.1.p1, GBLJ01046871.1.p1, gb|GESU01022425.1|.p1, gb|GESU01043449.1|.p1, gb|GESU01043562.1|.p1	PILA_00604, PILA_01664, PILA_07051, PILA_07257, PILA_09468, PILA_11104, PILA_14607, PILA_14740, PILA_25989, PILA_25996, PILA_36196, PILA_37058, gb|GEUZ01016350.1|.p1, gb|GEUZ01020038.1|.p1, gb|GEUZ01020721.1|.p1, gb|GEUZ01022236.1|.p1, gb|GEUZ01023127.1|.p1, gb|GEUZ01023134.1|.p1, gb|GEUZ01023187.1|.p1, gb|GEUZ01024606.1|.p1, gb|GEUZ01026077.1|.p1, gb|GEUZ01026934.1|.p1, gb|GEUZ01030413.1|.p1	GFHB01056673.1.p1, GFHB01093193.1.p1, GFHB01117357.1.p1, GFHB01118859.1.p1	GBQX01027053.1.p1, GBQX01030015.1.p1, GBQX01035139.1.p1, GBQX01039861.1.p2, GBQX01049767.1.p1	GECO01000637.1.p1, GECO01002797.1.p1, GECO01020405.1.p1, GECO01033975.1.p1, GECO01046986.1.p1, GECO01050923.1.p1, GGAU01013753.1.p3, GGAU01019150.1.p1, GGAU01019947.1.p1, GGAU01037578.1.p2, GGAU01037676.1.p2, GGAU01045657.1.p1, GGAU01049588.1.p2		1A_all_NT_comp45089_c0_seq1_1 type=cds; aalen=293_47%_complete-utrpoor; clen=1857; strand=-; offs=1588-707; evgclass=main_okay_match_2A_all_NT_comp87773_c0_seq1_pct_99_100;, 1A_all_NT_comp918190_c0_seq1_1 type=cds; aalen=149_76%_complete; clen=590; strand=+; offs=54-503; evgclass=noclass_okay_match_5A_I16_NT_comp5796_c0_seq1_pct_99_100;, 1A_all_VO_L_855_T_321_374_1 C_0.015_Length_2944 type=cds; a…	GFZL01000076.1.p1, GFZL01000356.1.p1, GFZL01001181.1.p1, GFZL01001644.1.p1, GFZL01017689.1.p1, GFZL01018239.1.p1, GFZL01018809.1.p1, GFZL01019295.1.p1, GFZL01019604.1.p1, GFZL01021379.1.p1, GFZL01024180.1.p1, GFZL01026601.1.p1, GFZL01028458.1.p2	GAZW02000535.1.p1, GAZW02001410.1.p1, GAZW02003829.1.p1, GAZW02004115.1.p1, GAZW02004356.1.p1, GAZW02004716.1.p1, GAZW02004757.1.p1, GAZW02007843.1.p1, GAZW02010634.1.p1, GAZW02010882.1.p1, GAZW02011012.1.p1, GAZW02011047.1.p1, GAZW02012447.1.p1, GAZW02012730.1.p1, GAZW02013694.1.p1, GAZW02017208.1.p1, GAZW02017491.1.p1, GAZW02024646.1.p1, GAZW02025100.1.p1, GAZW02037737.1.p1, GAZW02096001.1.p1, …	Thoc_c10952_g1_i2.p2, Thoc_c12151_g1_i1.p1, Thoc_c15219_g1_i1.p1, Thoc_c15219_g1_i1.p2, Thoc_c27069_g2_i1.p1, Thoc_c28906_g1_i1.p2	SEGI_01434, SEGI_04294, SEGI_07271, SEGI_08046, SEGI_11576, SEGI_14941, SEGI_15085, SEGI_15887, SEGI_17800, SEGI_18291, SEGI_19188, SEGI_19398, SEGI_21393, SEGI_22251, SEGI_23045, SEGI_25259, SEGI_25427, SEGI_26160, SEGI_26442, SEGI_26676, SEGI_27447, SEGI_28793, SEGI_28938, SEGI_30205, SEGI_32070, SEGI_32832, SEGI_33564, SEGI_33969, SEGI_34811, SEGI_35019, SEGI_38494, SEGI_40153, SEGI_40512, SEG…	SESE_010273, SESE_026486, SESE_027071, SESE_027335, SESE_027734, SESE_027796, SESE_028156, SESE_029128, SESE_032155, SESE_033394, SESE_034378, SESE_036781, SESE_038537, SESE_039990, SESE_041169, SESE_042222, SESE_043165, SESE_043698, SESE_043793, SESE_044284, SESE_044455, SESE_044464, SESE_044745, SESE_044820, SESE_045098, SESE_045106, SESE_045580, SESE_046186, SESE_047031, SESE_047098, SESE_0472…
OG0000046	GGJG01004324.1.p1, GGJG01010515.1.p1, GGJG01010516.1.p1, GGJG01018454.1.p1, GGJG01019046.1.p1, GGJG01030212.1.p1, GGJG01030342.1.p1		GBYR01049637.1.p1, GGBW01009302.1.p2, GGBW01013424.1.p1, GGBW01043277.1.p1, GHLL01168423.1.p1, Gb_13533	TnS000008117t06, TnS000008117t15, TnS000048545t04, TnS000077839t02, TnS000094611t02, TnS000129661t02, TnS000129661t03, TnS000138137t02, TnS000138137t03, TnS000160899t01, TnS000199439t01, TnS000207249t08, TnS000317261t05, TnS000366965t08, TnS000366965t09, TnS000366965t10, TnS000498063t43, TnS000498063t46, TnS000546439t01, TnS000546439t04, TnS000570111t01, TnS000573999t02, TnS000642093t02, TnS00069…	Megl_c26008_g2_i10.p1, Megl_c26008_g2_i11.p1, Megl_c26008_g2_i7.p1, Megl_c26008_g2_i8.p1, Megl_c26008_g2_i9.p1, Megl_c28289_g4_i1.p1, Megl_c28289_g7_i1.p1, Megl_c28392_g2_i2.p1, Megl_c28392_g4_i2.p1, Megl_c28632_g5_i1.p1, Megl_c9412_g1_i2.p1	GCHX01152854.1.p1, GCHX01153054.1.p1, GCHX01453054.1.p1, GCZO01100068.1.p1, GCZO01105417.1.p1, GCZO01201682.1.p1, GCZO01207256.1.p1, GCZO01307594.1.p1, GCZO01308138.1.p1, gb|GFBZ01006522.1|.p1, gi|830848538|gb|GCZO01327603.1|.p1, gi|830852114|gb|GCZO01324029.1|.p1, gi|830864100|gb|GCZO01312044.1|.p1, gi|830884873|gb|GCZO01295300.1|.p1, gi|830889231|gb|GCZO01290942.1|.p1, gi|830913722|gb|GCZO01266…	GGJJ01000398.1.p1, GGJJ01003960.1.p1, GGJJ01010226.1.p1, GGJJ01010687.1.p1, GGJJ01011461.1.p1, GGJJ01016624.1.p1, GGJJ01019409.1.p1, GGJJ01020279.1.p1, GGJJ01021458.1.p1, GGJJ01051400.1.p1	GDQR01000012.1.p1, GDQR01003035.1.p1, GDQR01003535.1.p1, GDQR01005602.1.p1, GDQR01016755.1.p1, GFLL01072531.1.p1, GFLL01086566.1.p1, GFLL01124931.1.p1, GFLL01129003.1.p1, GFLL01141897.1.p1, gb|GFBO01062042.1|.p1, gb|GFBO01064510.1|.p1, gb|GFBO01069401.1|.p1	GGJH01007074.1.p1, GGJH01011275.1.p1, GGJH01011709.1.p1, GGJH01011866.1.p1, GGJH01022306.1.p1, GGJH01024119.1.p1, GGJH01025918.1.p1, GGJH01029777.1.p1, GGJH01038155.1.p1	HAMI01001631.1.p1, HAMI01002167.1.p1, HAMI01002237.1.p1, HAMI01005825.1.p1, HAMI01010925.1.p1, HAMI01012326.1.p1, HAMI01012458.1.p1, HAMI01014742.1.p1, HAMI01020521.1.p1, HAMI01030209.1.p1	GBLJ01002402.1.p1, GBLJ01005560.1.p1, GBLJ01007209.1.p1, GBLJ01008098.1.p1, GBLJ01012839.1.p1, GBLJ01013937.1.p1, GBLJ01022359.1.p1, GBLJ01030863.1.p1, gb|GESU01010782.1|.p1, gb|GESU01012280.1|.p1, gb|GESU01012387.1|.p1, gb|GESU01013241.1|.p1, gb|GESU01020695.1|.p1, gb|GESU01023172.1|.p1, gb|GESU01023906.1|.p1, gb|GESU01027290.1|.p1, gb|GESU01044528.1|.p1	PILA_09094, PILA_09894, PILA_11597, PILA_12500, PILA_13852, PILA_20798, PILA_26697, PILA_26784, PILA_30941, PILA_34537, gb|GEUZ01010159.1|.p1, gb|GEUZ01015686.1|.p1, gb|GEUZ01016091.1|.p1, gb|GEUZ01016192.1|.p1, gb|GEUZ01020705.1|.p1, gb|GEUZ01021945.1|.p1	GAQR01032268.1.p1, GAQR01037020.1.p1, GAQR01037022.1.p1, GAQR01037025.1.p1, GAQR01037035.1.p1, GAQR01041104.1.p1, GAQR01041105.1.p1, GAQR01043530.1.p1, GAQR01049026.1.p1, GAQR01049027.1.p1, GAQR01049028.1.p1, GFHB01047599.1.p1, GFHB01075507.1.p1, GFHB01094918.1.p1	GBQX01015189.1.p1, GBQX01020968.1.p1, GBQX01021551.1.p1, GBQX01022987.1.p1, GBQX01030962.1.p1, GBQX01034219.1.p1, GBQX01036157.1.p1, GBQX01041633.1.p1, GBQX01042006.1.p1, GBQX01043137.1.p1, GBQX01050020.1.p1, GDQD01005775.1.p1	GECO01005672.1.p1, GECO01012766.1.p1, GECO01014123.1.p1, GECO01016532.1.p1, GECO01019083.1.p1, GECO01029275.1.p1, GECO01029276.1.p1, GECO01029628.1.p1, GECO01032943.1.p1, GECO01041291.1.p1, GECO01052001.1.p1, GGAU01019050.1.p2, GGAU01019994.1.p2	GGJK01007685.1.p1, GGJK01007686.1.p2, GGJK01010097.1.p1, GGJK01018463.1.p1, GGJK01020213.1.p1, GGJK01023770.1.p1, GGJK01026710.1.p1, GGJK01027593.1.p1, GGJK01028095.1.p1, GGJK01029992.1.p1, GGJK01031593.1.p1, GGJK01035523.1.p1, GGJK01036125.1.p1, GGJK01036247.1.p1, GGJK01040994.1.p1	1A_I3_VO_L_1_T_126778_136734_1 C_0.000_Length_2052 type=cds; aalen=351_51%_complete-utrpoor; clen=2052; strand=+; offs=565-1620; evgclass=main_okay_match_1A_I3_VO_L_1_T_126388_136734 C_0.000_Length_1309_pct_98_100;, 1A_I5_VO_L_3606_T_18_64_1 C_0.046_Length_1432 type=cds; aalen=338_71%_complete; clen=1432; strand=-; offs=1363-347; evgclass=main_okay_match_2A_I15_VO_L_74_T_1130_1583 C_0.003_Length_…	GFZL01012001.1.p1, GFZL01012004.1.p1, GFZL01012130.1.p1, GFZL01012751.1.p1, GFZL01012752.1.p1, GFZL01012786.1.p1, GFZL01013220.1.p1, GFZL01019513.1.p1, GFZL01020329.1.p1, GFZL01021754.1.p1, GFZL01022915.1.p1, GFZL01023405.1.p1, GFZL01027266.1.p1	GAZW02024025.1.p2, GAZW02043004.1.p1, GAZW02043005.1.p1, GAZW02102064.1.p1, GAZW02102848.1.p1, GFFY01004863.1.p1, GFFY01011268.1.p1, GFFY01018501.1.p1, GFFY01022024.1.p1, GFFY01026930.1.p1, GFFY01033692.1.p1, GFFY01040717.1.p1, GFFY01050000.1.p1, GFFY01079673.1.p1, GFFY01079790.1.p1, GFFY01091077.1.p1, PSME_00131, PSME_08609, PSME_23742, PSME_37381	Thoc_c11590_g1_i1.p1, Thoc_c25169_g1_i1.p1, Thoc_c25169_g1_i2.p1, Thoc_c26323_g1_i2.p1, Thoc_c27840_g1_i2.p1, Thoc_c27840_g2_i2.p1, Thoc_c27840_g3_i1.p1, Thoc_c28274_g1_i1.p1, Thoc_c28274_g1_i3.p1, Thoc_c28387_g1_i2.p1, Thoc_c28387_g2_i2.p1, Thoc_c28387_g2_i5.p1, Thoc_c28387_g6_i1.p1, Thoc_c28898_g1_i3.p1, Thoc_c28898_g1_i6.p1, Thoc_c29067_g1_i4.p1, Thoc_c29067_g1_i6.p1, Thoc_c29102_g2_i1.p1, Tho…	SEGI_02392, SEGI_08041, SEGI_09506, SEGI_11497, SEGI_15161, SEGI_15220, SEGI_16672, SEGI_17454, SEGI_19939, SEGI_21987, SEGI_24737, SEGI_27248, SEGI_28429, SEGI_30243, SEGI_35462, SEGI_35782, SEGI_38423, SEGI_40672, SEGI_40927	SESE_001958, SESE_003570, SESE_007059, SESE_021337, SESE_021364, SESE_022754, SESE_023175, SESE_026672, SESE_027203, SESE_038603, SESE_042667, SESE_045437, SESE_052263, SESE_054565, SESE_054949, SESE_059854, SESE_069272, SESE_071571, SESE_080287, SESE_090091, SESE_091238, SESE_091811, SESE_094942, SESE_096373, SESE_098265, SESE_099663, SESE_110060, SESE_116565, SESE_119203, SESE_124094, SESE_1246…
OG0000047	GGJG01014121.1.p1, GGJG01019692.1.p1, GGJG01021764.1.p1, GGJG01027212.1.p1, GGJG01042497.1.p1, GGJG01044930.1.p1		Gb_22369		Megl_c17459_g1_i1.p1, Megl_c20808_g1_i1.p1, Megl_c23068_g1_i1.p1, Megl_c23068_g3_i1.p1	GCHX01152426.1.p1, GCHX01254140.1.p1, GCHX01446034.1.p1, GCZO01300277.1.p1, gb|GFBZ01003636.1|.p2, gb|GFBZ01009853.1|.p1, gb|GFBZ01011573.1|.p2, gb|GFBZ01011584.1|.p1, gb|GFBZ01013685.1|.p2, gi|830829130|gb|GCZO01347008.1|.p1, gi|830833128|gb|GCZO01343011.1|.p1, gi|830893296|gb|GCZO01286877.1|.p1, gi|830900226|gb|GCZO01279948.1|.p1, gi|831001803|gb|GCZO01178614.1|.p1, gi|831007221|gb|GCZO01173218…	GGJJ01002081.1.p1, GGJJ01003200.1.p1, GGJJ01003382.1.p1, GGJJ01014399.1.p1, GGJJ01014795.1.p1, GGJJ01016875.1.p1, GGJJ01024185.1.p1, GGJJ01029884.1.p2, GGJJ01030420.1.p1, GGJJ01033263.1.p1, GGJJ01034834.1.p1, GGJJ01040558.1.p1, GGJJ01041812.1.p1, GGJJ01053324.1.p1	GDQR01002083.1.p1, GDQR01003698.1.p1, GDQR01005155.1.p1, GDQR01007210.1.p1, GDQR01007599.1.p1, GFLL01049717.1.p1, GFLL01079264.1.p1, GFLL01138807.1.p1, GFLL01141958.1.p1, gb|GFBO01051441.1|.p1, gb|GFBO01068255.1|.p1, gb|GFBO01086942.1|.p1, gb|GFBO01090720.1|.p1	GGJH01001276.1.p1, GGJH01011226.1.p1, GGJH01017883.1.p1, GGJH01019542.1.p1, GGJH01022692.1.p1, GGJH01028200.1.p1, GGJH01030955.1.p1, GGJH01034296.1.p1, GGJH01036680.1.p1	HAMI01002324.1.p1, HAMI01005237.1.p1, HAMI01005662.1.p1, HAMI01007541.1.p2, HAMI01015295.1.p1, HAMI01017901.1.p1, HAMI01018145.1.p1, HAMI01019928.1.p1, HAMI01023208.1.p1, HAMI01024969.1.p1, HAMI01026122.1.p1, HAMI01027813.1.p1, HAMI01029473.1.p1	GBLJ01000757.1.p1, GBLJ01002329.1.p1, GBLJ01005262.1.p1, GBLJ01007700.1.p1, GBLJ01016026.1.p1, GBLJ01024821.1.p1, GBLJ01034104.1.p1, GBLJ01034117.1.p1, GBLJ01037709.1.p1, GBLJ01045757.1.p1, gb|GESU01013710.1|.p1, gb|GESU01014801.1|.p1, gb|GESU01017406.1|.p1, gb|GESU01035289.1|.p1	PILA_00275, PILA_00343, PILA_02306, PILA_03377, PILA_03712, PILA_05966, PILA_09029, PILA_10665, PILA_10989, PILA_10990, PILA_11400, PILA_12758, PILA_13987, PILA_14175, PILA_17611, PILA_18158, PILA_18369, PILA_20574, PILA_21133, PILA_22485, PILA_22486, PILA_24406, PILA_25249, PILA_25999, PILA_26827, PILA_28883, PILA_29558, PILA_31172, PILA_31214, PILA_32711, PILA_32953, PILA_33198, PILA_33530, PIL…	GAQR01000823.1.p1, GAQR01008570.1.p1, GAQR01023006.1.p1, GAQR01023011.1.p1, GAQR01026269.1.p1, GAQR01032601.1.p1, GAQR01044889.1.p1, GAQR01044891.1.p1, GAQR01047198.1.p1, GAQR01060471.1.p2, GFHB01031727.1.p1, GFHB01066041.1.p1, GFHB01081798.1.p1, GFHB01090824.1.p1, GFHB01095331.1.p1, GFHB01131425.1.p1, GFHB01133505.1.p1, GFHB01137232.1.p1, GFHB01152874.1.p1, GFHB01172467.1.p1	GBQX01022539.1.p1, GBQX01024802.1.p1, GBQX01034609.1.p1, GBQX01037911.1.p1, GBQX01038506.1.p1, GDQD01001725.1.p1, GDQD01008672.1.p1	GECO01018912.1.p1, GECO01018996.1.p1, GECO01019060.1.p1, GECO01020491.1.p1, GECO01026987.1.p1, GECO01026988.1.p1, GECO01027014.1.p1, GECO01027023.1.p1, GECO01028022.1.p1, GECO01030298.1.p1, GECO01031086.1.p1, GECO01031988.1.p1, GECO01034310.1.p1, GECO01034509.1.p1, GECO01035599.1.p1, GECO01037722.1.p1, GECO01045465.1.p1, GECO01049895.1.p1, GGAU01003532.1.p1, GGAU01019884.1.p1, GGAU01020493.1.p2, …	GGJK01010052.1.p1, GGJK01014862.1.p1, GGJK01016501.1.p1, GGJK01016714.1.p1, GGJK01017658.1.p1, GGJK01023019.1.p1, GGJK01029121.1.p1, GGJK01040630.1.p1, GGJK01041805.1.p1	1A_I11_VO_L_3895_T_14_14_1 C_0.242_Length_4279 type=cds; aalen=970_68%_complete; clen=4279; strand=-; offs=4019-1107; evgclass=main_okay_match_6A_all_VO_L_7_T_7633_72082 C_0.000_Length_4023_pct_99_100;, 1A_I5_VO_L_1564_T_127_161_1 C_0.059_Length_1176 type=cds; aalen=194_49%_complete-utrpoor; clen=1176; strand=+; offs=69-653; evgclass=noclass_okay_match_1A_I5_NT_comp147448_c0_seq1_pct_100_79;, 1A_…	GFZL01000061.1.p1, GFZL01009775.1.p1, GFZL01011818.1.p1, GFZL01012491.1.p1, GFZL01012557.1.p1, GFZL01012594.1.p1, GFZL01012615.1.p1, GFZL01012653.1.p1, GFZL01012736.1.p1, GFZL01013206.1.p1, GFZL01013215.1.p1, GFZL01013466.1.p1, GFZL01019712.1.p1, GFZL01019738.1.p1, GFZL01019993.1.p1, GFZL01020076.1.p1, GFZL01020097.1.p1, GFZL01021199.1.p1, GFZL01024914.1.p1, GFZL01025918.1.p1, GFZL01026550.1.p1, …	GAZW02008669.1.p1, GAZW02023540.1.p1, GAZW02042569.1.p1, GAZW02069627.1.p1, GAZW02069628.1.p1, GAZW02091089.1.p1, GAZW02091091.1.p1, GAZW02099942.1.p1, GFFY01002283.1.p1, GFFY01005361.1.p1, GFFY01005405.1.p1, GFFY01005689.1.p1, GFFY01006711.1.p1, GFFY01009333.1.p1, GFFY01011266.1.p1, GFFY01021145.1.p1, GFFY01030255.1.p1, GFFY01051539.1.p1, GFFY01057495.1.p1, GFFY01130138.1.p1, PSME_03692, PSME_06…	Thoc_c18480_g1_i1.p1, Thoc_c28829_g1_i1.p2, Thoc_c28829_g2_i1.p1, Thoc_c6001_g1_i1.p1	SEGI_00367, SEGI_04090, SEGI_05643, SEGI_06045, SEGI_09325, SEGI_10244, SEGI_13670, SEGI_14466, SEGI_14559, SEGI_14692, SEGI_14866, SEGI_18550, SEGI_18920, SEGI_20071, SEGI_20079, SEGI_21463, SEGI_22663, SEGI_25008, SEGI_25236, SEGI_25825, SEGI_30401, SEGI_33249, SEGI_34658, SEGI_34974, SEGI_35219, SEGI_35997	SESE_025437, SESE_026303, SESE_030523, SESE_032234, SESE_043581, SESE_043746, SESE_043888, SESE_045900, SESE_046908, SESE_047259, SESE_047540, SESE_047737, SESE_048619, SESE_049241, SESE_049250, SESE_050721, SESE_050822, SESE_051698, SESE_051739, SESE_051851, SESE_051969, SESE_052046, SESE_052405, SESE_053314, SESE_054137, SESE_059743, SESE_065193, SESE_074034, SESE_075690, SESE_076090, SESE_0859…
OG0000048	GGJG01001865.1.p1, GGJG01002077.1.p1, GGJG01002780.1.p1, GGJG01002967.1.p1, GGJG01007509.1.p1, GGJG01008365.1.p1, GGJG01014390.1.p1, GGJG01015731.1.p1, GGJG01021664.1.p1, GGJG01024777.1.p1, GGJG01028473.1.p2, GGJG01029360.1.p1, GGJG01035434.1.p1, GGJG01041093.1.p1	evm_27.model.AmTr_v1.0_scaffold00021.186 pacid=31563402 transcript=evm_27.model.AmTr_v1.0_scaffold00021.186 locus=evm_27.TU.AmTr_v1.0_scaffold00021.186 ID=evm_27.model.AmTr_v1.0_scaffold00021.186.v1.0 annot-version=v1.0, evm_27.model.AmTr_v1.0_scaffold00033.47 pacid=31561866 transcript=evm_27.model.AmTr_v1.0_scaffold00033.47 locus=evm_27.TU.AmTr_v1.0_scaffold00033.47 ID=evm_27.model.AmTr_v1.0_sca…	GBYR01009473.1.p1, GBYR01020339.1.p1, GBYR01020342.1.p1, GBYR01020747.1.p1, GBYR01028904.1.p1, GBYR01028907.1.p1, GBYR01038379.1.p1, GBYR01041051.1.p1, GBYR01044354.1.p1, GGBW01015953.1.p1, GGBW01027685.1.p1, GGBW01029285.1.p1, GGBW01046705.1.p1, GGBW01064522.1.p1, Gb_38507	TnS000002373t01, TnS000367669t02, TnS000469903t08, TnS000469903t11, TnS000867017t22, TnS000918777t02, TnS000956981t01, TnS000956981t05	Megl_c13256_g1_i1.p1, Megl_c17040_g1_i1.p1, Megl_c18224_g2_i2.p1, Megl_c20967_g2_i2.p1, Megl_c24819_g2_i1.p1, Megl_c26190_g1_i1.p1, Megl_c27882_g2_i1.p1, Megl_c28043_g2_i1.p1, Megl_c28246_g3_i1.p1, Megl_c28907_g1_i1.p1	GCZO01100221.1.p1, GCZO01207141.1.p1, gb|GFBZ01003876.1|.p1, gb|GFBZ01010795.1|.p1, gb|GFBZ01014735.1|.p1, gi|830825610|gb|GCZO01350526.1|.p2, gi|830841610|gb|GCZO01334529.1|.p1, gi|830850059|gb|GCZO01326083.1|.p1, gi|830855333|gb|GCZO01320810.1|.p1, gi|830864647|gb|GCZO01311497.1|.p1, gi|830888899|gb|GCZO01291274.1|.p1, gi|830909436|gb|GCZO01270738.1|.p1, gi|830912747|gb|GCZO01267427.1|.p1, gi|8…	GGJJ01001328.1.p1, GGJJ01001912.1.p1, GGJJ01002137.1.p1, GGJJ01003062.1.p1, GGJJ01007667.1.p1, GGJJ01008527.1.p1, GGJJ01014677.1.p1, GGJJ01016035.1.p1, GGJJ01026050.1.p1, GGJJ01026526.1.p1, GGJJ01047506.1.p1	GDQR01001877.1.p1, GDQR01002270.1.p1, GDQR01004548.1.p1, GDQR01005088.1.p1, GDQR01007878.1.p1, GDQR01010606.1.p1, GDQR01017005.1.p1, GDQR01021922.1.p1, GDQR01023143.1.p1, GFLL01116596.1.p1, GFLL01131671.1.p1, GFLL01131678.1.p1, GFLL01141486.1.p1	GGJH01000600.1.p1, GGJH01000748.1.p1, GGJH01001021.1.p1, GGJH01001351.1.p1, GGJH01001733.1.p1, GGJH01004559.1.p1, GGJH01006666.1.p1, GGJH01013833.1.p1, GGJH01015493.1.p1, GGJH01017339.1.p1	HAMI01000017.1.p1, HAMI01000669.1.p1, HAMI01001058.1.p1, HAMI01002854.1.p1, HAMI01004837.1.p1, HAMI01005097.1.p1, HAMI01006430.1.p1, HAMI01012061.1.p1, HAMI01025084.1.p1, HAMI01028805.1.p1, HAMI01035840.1.p1, HAMI01036282.1.p1, HAMI01039073.1.p1	GBLJ01001847.1.p1, GBLJ01003491.1.p1, GBLJ01011693.1.p1, GBLJ01012731.1.p1, GBLJ01018283.1.p1, GBLJ01022269.1.p1, GBLJ01023858.1.p1, GBLJ01040236.1.p1, GBLJ01041642.1.p1, gb|GESU01000686.1|.p1, gb|GESU01018443.1|.p1, gb|GESU01018773.1|.p1, gb|GESU01020077.1|.p1, gb|GESU01021380.1|.p1, gb|GESU01041860.1|.p1	PILA_00711, PILA_01118, PILA_06346, PILA_08252, PILA_08655, PILA_08656, PILA_10461, PILA_11068, PILA_11625, PILA_12233, PILA_13914, PILA_14168, PILA_15579, PILA_18999, PILA_19391, PILA_21196, PILA_22709, PILA_23745, PILA_24491, PILA_26211, PILA_26613, PILA_28500, PILA_29344, PILA_30206, PILA_30969, PILA_34569, gb|GEUZ01000894.1|.p1, gb|GEUZ01000959.1|.p1, gb|GEUZ01000993.1|.p1, gb|GEUZ01001000.1|…	GAQR01030436.1.p1, GAQR01030437.1.p1, GAQR01032393.1.p1, GAQR01043206.1.p1, GAQR01045625.1.p1, GAQR01046529.1.p1, GAQR01047197.1.p1, GAQR01049076.1.p1, GAQR01049081.1.p1, GFHB01000652.1.p1, GFHB01006376.1.p1, GFHB01130578.1.p1, GFHB01164096.1.p1	GBQX01020871.1.p1, GBQX01029089.1.p1, GBQX01042422.1.p1, GBQX01047936.1.p1, GBQX01048553.1.p1, GBQX01048598.1.p1, GBQX01050807.1.p1, GBQX01051152.1.p1, GBQX01052306.1.p1, GBQX01053203.1.p1, GDQD01001037.1.p1, GDQD01001134.1.p1, GDQD01010389.1.p1	GECO01009630.1.p1, GECO01009959.1.p1, GECO01010106.1.p1, GECO01014663.1.p1, GECO01015334.1.p1, GECO01016684.1.p1, GECO01017207.1.p1, GECO01032408.1.p1, GECO01033322.1.p1, GECO01042785.1.p1, GECO01042821.1.p1, GECO01043501.1.p1, GECO01050163.1.p1, GGAU01028247.1.p1, GGAU01037702.1.p2	GGJK01000558.1.p1, GGJK01000709.1.p1, GGJK01000960.1.p1, GGJK01000961.1.p1, GGJK01001238.1.p1, GGJK01001595.1.p1, GGJK01006001.1.p1, GGJK01010589.1.p1, GGJK01013779.1.p1, GGJK01025355.1.p1, GGJK01031652.1.p1, GGJK01037571.1.p1	1A_I11_VO_L_1_T_102848_226447_1 C_0.000_Length_3698 type=cds; aalen=987_80%_complete; clen=3698; strand=+; offs=315-3278; evgclass=main_okay_match_1A_I11_VO_L_1_T_102832_226447 C_0.000_Length_3591_pct_99_100;, 1A_I11_VO_L_1_T_28300_226447_1 C_0.000_Length_3346 type=cds; aalen=990_88%_complete; clen=3346; strand=-; offs=3125-153; evgclass=main_okay_match_5A_I15_VO_L_1706_T_11_33 C_0.396_Length_328…	GFZL01000867.1.p1, GFZL01000921.1.p1, GFZL01000964.1.p1, GFZL01005121.1.p1, GFZL01008466.1.p1, GFZL01011545.1.p1, GFZL01011590.1.p1, GFZL01012911.1.p1, GFZL01014732.1.p1, GFZL01015691.1.p1, GFZL01020285.1.p1, GFZL01021027.1.p1, GFZL01021902.1.p1, GFZL01024014.1.p1, GFZL01024173.1.p1, GFZL01024856.1.p1, GFZL01026666.1.p1	GAZW02003383.1.p1, GAZW02054260.1.p1, GAZW02091427.1.p1, GAZW02096986.1.p1, GAZW02101498.1.p1, GAZW02101501.1.p1, GAZW02101975.1.p1, GFFY01002446.1.p1, GFFY01002953.1.p1, GFFY01003404.1.p1, GFFY01003577.1.p1, GFFY01004838.1.p1, PSME_02391, PSME_03383, PSME_10195, PSME_15083, PSME_37538, PSME_38002, PSME_43715	Thoc_c16486_g2_i1.p1, Thoc_c20404_g1_i1.p1, Thoc_c22573_g2_i1.p1, Thoc_c25362_g1_i1.p1, Thoc_c25806_g1_i1.p1, Thoc_c25978_g1_i1.p1, Thoc_c26846_g1_i1.p1, Thoc_c27104_g1_i2.p1, Thoc_c27104_g2_i1.p1, Thoc_c28899_g1_i1.p1, Thoc_c28899_g1_i2.p1, Thoc_c28899_g2_i1.p1, Thoc_c32186_g1_i1.p1, Thoc_c32532_g1_i1.p1, Thoc_c3777_g1_i2.p1	SEGI_01616, SEGI_04279, SEGI_11580, SEGI_14389, SEGI_18130, SEGI_24549, SEGI_27227, SEGI_28073, SEGI_31621, SEGI_35620, SEGI_36696, SEGI_38827, SEGI_39245, SEGI_39679, SEGI_40744	SESE_009716, SESE_012265, SESE_015237, SESE_016724, SESE_018548, SESE_021949, SESE_025500, SESE_026916, SESE_028215, SESE_029158, SESE_029716, SESE_029936, SESE_031104, SESE_032533, SESE_032860, SESE_033709, SESE_036437, SESE_036698, SESE_036826, SESE_037333, SESE_038086, SESE_039821, SESE_043017, SESE_043448, SESE_064286, SESE_065221, SESE_065428, SESE_065842, SESE_067260, SESE_067894, SESE_0681…
OG0000049	GGJG01000198.1.p1, GGJG01004989.1.p1, GGJG01009062.1.p1, GGJG01010701.1.p1, GGJG01016219.1.p1, GGJG01020656.1.p1, GGJG01023578.1.p1, GGJG01023762.1.p1, GGJG01025411.1.p1, GGJG01026345.1.p1, GGJG01028089.1.p1, GGJG01028424.1.p1, GGJG01033785.1.p1, GGJG01034317.1.p1, GGJG01041971.1.p1, GGJG01044131.1.p1		GGBW01016192.1.p1, GGBW01016195.1.p1, GGBW01052241.1.p1, GHLL01081573.1.p1, GHLL01256454.1.p1, GHLL01455852.1.p2, Gb_04558, Gb_14207, Gb_15089, Gb_28309		Megl_c26932_g4_i1.p1, Megl_c26932_g5_i2.p1, Megl_c26932_g6_i1.p1	GCHX01245538.1.p1, GCZO01008218.1.p1, GCZO01106644.1.p1, GCZO01303724.1.p1, gb|GFBZ01000439.1|.p2, gi|830827829|gb|GCZO01348308.1|.p1, gi|830832190|gb|GCZO01343949.1|.p1, gi|830841664|gb|GCZO01334475.1|.p1, gi|830852814|gb|GCZO01323329.1|.p1, gi|830890039|gb|GCZO01290134.1|.p1, gi|830897055|gb|GCZO01283119.1|.p1, gi|830913314|gb|GCZO01266860.1|.p1, gi|831090266|gb|GCZO01090192.1|.p1, gi|831093991…	GGJJ01000179.1.p1, GGJJ01005193.1.p1, GGJJ01010159.1.p1, GGJJ01013176.1.p1, GGJJ01021802.1.p1, GGJJ01026051.1.p1, GGJJ01026363.1.p1, GGJJ01028305.1.p1, GGJJ01029753.1.p1, GGJJ01030806.1.p1, GGJJ01034206.1.p1, GGJJ01034384.1.p1, GGJJ01034610.1.p1, GGJJ01034707.1.p1, GGJJ01052906.1.p1, GGJJ01053023.1.p1	GDQR01000226.1.p1, GDQR01016821.1.p1, GFLL01107878.1.p2, GFLL01141800.1.p1	GGJH01018724.1.p1, GGJH01021760.1.p1, GGJH01022932.1.p1, GGJH01024152.1.p1, GGJH01024583.1.p1, GGJH01025055.1.p1, GGJH01025159.1.p1, GGJH01027434.1.p1, GGJH01028506.1.p1, GGJH01031854.1.p1, GGJH01037575.1.p1, GGJH01039012.1.p1	HAMI01001450.1.p1, HAMI01012917.1.p1, HAMI01015487.1.p1, HAMI01030922.1.p1, HAMI01033389.1.p1	GBLJ01007575.1.p1, GBLJ01009403.1.p1, gb|GESU01004586.1|.p1, gb|GESU01039907.1|.p1	PILA_00044, PILA_04227, PILA_04228, PILA_05213, PILA_05808, PILA_05818, PILA_06256, PILA_08113, PILA_08114, PILA_08158, PILA_08160, PILA_09779, PILA_11283, PILA_13473, PILA_13667, PILA_18108, PILA_18482, PILA_18786, PILA_22160, PILA_22186, PILA_22376, PILA_22774, PILA_22776, PILA_23939, PILA_26052, PILA_26756, PILA_27799, PILA_30834, PILA_35242, PILA_35533, gb|GEUZ01001179.1|.p1, gb|GEUZ01005909.…	GAQR01014621.1.p1, GAQR01018043.1.p1, GAQR01027048.1.p1, GAQR01042178.1.p1, GAQR01042182.1.p1, GFHB01112473.1.p1, GFHB01143890.1.p1	GBQX01039932.1.p1, GBQX01048814.1.p1, GDQD01002769.1.p1	GECO01004114.1.p1, GECO01013828.1.p1, GECO01014696.1.p1, GECO01017328.1.p1, GECO01017587.1.p1, GECO01032241.1.p1, GECO01032758.1.p1, GECO01033542.1.p1, GECO01038941.1.p1, GECO01043008.1.p1, GECO01049323.1.p1, GECO01049810.1.p1, GECO01050145.1.p1, GGAU01019039.1.p2, GGAU01038011.1.p1, GGAU01038728.1.p1, GGAU01040051.1.p1, GGAU01040066.1.p2, GGAU01047667.1.p4, GGAU01049239.1.p2, GGAU01049696.1.p2, …	GGJK01017872.1.p1, GGJK01018163.1.p1, GGJK01018222.1.p1, GGJK01020906.1.p1, GGJK01021842.1.p1, GGJK01022964.1.p1, GGJK01023521.1.p1, GGJK01024754.1.p1, GGJK01028666.1.p1, GGJK01036182.1.p1, GGJK01036919.1.p1, GGJK01040376.1.p1, GGJK01041014.1.p1, GGJK01042393.1.p1	1A_I11_NT_comp46892_c1_seq2_1 type=cds; aalen=297_88%_complete; clen=1014; strand=+; offs=1-894; evgclass=main_okay_match_6A_I21_VO_L_1_T_66150_217332 C_0.000_Length_815_pct_99_100;, 1A_I11_VO_L_1_T_154428_226447_1 C_0.000_Length_1439 type=cds; aalen=234_48%_complete-utrpoor; clen=1439; strand=+; offs=480-1184; evgclass=noclass_okay_match_5A_I13_VO_L_1496_T_148_241 C_0.045_Length_954_pct_98_100;,…	GFZL01012013.1.p1, GFZL01014493.1.p1, GFZL01019322.1.p1, GFZL01019519.1.p1, GFZL01019747.1.p1, GFZL01019851.1.p1, GFZL01019969.1.p1, GFZL01021079.1.p1, GFZL01022529.1.p1, GFZL01024142.1.p1, GFZL01024657.1.p1, GFZL01024825.1.p1, GFZL01025466.1.p1, GFZL01025670.1.p1, GFZL01025766.1.p1, GFZL01026384.1.p1, GFZL01027359.1.p1, GFZL01028477.1.p1, GFZL01028504.1.p1, GFZL01028544.1.p1	GFFY01000035.1.p1, GFFY01004884.1.p1, GFFY01005090.1.p1, GFFY01009380.1.p1, GFFY01012434.1.p1, GFFY01019201.1.p1, GFFY01019769.1.p1, GFFY01036528.1.p1, GFFY01053094.1.p1, GFFY01053385.1.p1, PSME_01056, PSME_01165, PSME_02697, PSME_04507, PSME_04508, PSME_06122, PSME_06124, PSME_06733, PSME_08336, PSME_09683, PSME_10328, PSME_19144, PSME_20386, PSME_22468, PSME_24077, PSME_24101, PSME_24510, PSME_…	Thoc_c24353_g1_i1.p1, Thoc_c28886_g1_i1.p2, Thoc_c28886_g2_i1.p1, Thoc_c28949_g1_i1.p1, Thoc_c28988_g3_i2.p1, Thoc_c29042_g6_i1.p1, Thoc_c29042_g8_i2.p2, Thoc_c35101_g1_i1.p1	SEGI_00761, SEGI_01065, SEGI_01632, SEGI_04473, SEGI_04872, SEGI_05860, SEGI_07301, SEGI_09098, SEGI_10127, SEGI_12499, SEGI_14810, SEGI_17901, SEGI_19005, SEGI_20364, SEGI_20941, SEGI_22124, SEGI_22207, SEGI_22817, SEGI_23945, SEGI_25130, SEGI_25546, SEGI_28303, SEGI_28622, SEGI_33555, SEGI_35834, SEGI_36519, SEGI_36719, SEGI_37159, SEGI_37507, SEGI_37642, SEGI_38187	SESE_002951, SESE_025972, SESE_027847, SESE_030331, SESE_031703, SESE_033592, SESE_034293, SESE_035215, SESE_037326, SESE_038772, SESE_038863, SESE_038992, SESE_039624, SESE_039831, SESE_040676, SESE_042666, SESE_042884, SESE_051326, SESE_052153, SESE_056323, SESE_058858, SESE_063577, SESE_063659, SESE_064952, SESE_066326, SESE_066769, SESE_066944, SESE_068704, SESE_070238, SESE_070412, SESE_0716…
OG0000050	GGJG01017961.1.p1, GGJG01027504.1.p1, GGJG01028319.1.p1	evm_27.model.AmTr_v1.0_scaffold00069.8 pacid=31558098 transcript=evm_27.model.AmTr_v1.0_scaffold00069.8 locus=evm_27.TU.AmTr_v1.0_scaffold00069.8 ID=evm_27.model.AmTr_v1.0_scaffold00069.8.v1.0 annot-version=v1.0	GBYR01022084.1.p1, GGBW01002576.1.p1, GGBW01011143.1.p1, GGBW01025211.1.p2, GGBW01047850.1.p1, GGBW01054820.1.p2, GHLL01060218.1.p1, GHLL01130999.1.p1, GHLL01186924.1.p1, GHLL01209122.1.p1, GHLL01216235.1.p1, GHLL01216239.1.p1, GHLL01216245.1.p2, GHLL01247680.1.p2, GHLL01258178.1.p2, GHLL01261644.1.p1, GHLL01273445.1.p1, GHLL01281066.1.p1, GHLL01370663.1.p1, GHLL01666928.1.p1, Gb_10490, Gb_10811,…		Megl_c11119_g1_i1.p1, Megl_c40049_g1_i1.p1	GCHX01352514.1.p1, GCHX01353483.1.p2, GCHX01448518.1.p1, GCZO01005056.1.p1, GCZO01005531.1.p1, GCZO01006900.1.p2, GCZO01205957.1.p2, gb|GFBZ01020101.1|.p1, gb|GFBZ01021067.1|.p1, gb|GFBZ01023815.1|.p1, gb|GFBZ01024735.1|.p1, gb|GFBZ01025057.1|.p1, gi|830827513|gb|GCZO01348624.1|.p1, gi|831034490|gb|GCZO01145955.1|.p1, gi|831082941|gb|GCZO01097516.1|.p1, gi|831092717|gb|GCZO01087741.1|.p1, gi|8310…	GGJJ01056887.1.p1	GFLL01011456.1.p1, GFLL01036087.1.p1, GFLL01062907.1.p1, GFLL01089244.1.p3, GFLL01176939.1.p2		HAMI01006815.1.p1	GBLJ01017515.1.p1, GBLJ01038713.1.p1, gb|GESU01027496.1|.p1, gb|GESU01034174.1|.p1	PILA_03106, PILA_24695		GBQX01026212.1.p1, GBQX01030184.1.p1	GECO01006547.1.p1, GECO01011527.1.p1, GECO01021835.1.p1, GGAU01002892.1.p4, GGAU01030824.1.p1		1A_all_OT_comp113367_c0_seq2_1 type=cds; aalen=194_55%_complete-utrpoor; clen=1050; strand=+; offs=295-879; evgclass=main_okay_match_5A_I16_VO_L_17617_T_2_5 C_0.571_Length_593_pct_98_100;, 2A_all_VO_L_1_T_114445_181832_1 C_0.000_Length_1259 type=cds; aalen=214_51%_complete-utrpoor; clen=1259; strand=-; offs=1092-448; evgclass=main_okay_match_2A_I13_VO_L_8231_T_1_4 C_0.600_Length_542_pct_99_100;, …	GFZL01002347.1.p1, GFZL01015376.1.p1	GAZW02009621.1.p1, GAZW02011264.1.p1, GAZW02081868.1.p2, GAZW02087783.1.p1, GAZW02100642.1.p1, GAZW02101290.1.p1, GFFY01004241.1.p1, GFFY01022760.1.p1, GFFY01041554.1.p1, GFFY01046005.1.p1, GFFY01046141.1.p1, GFFY01046359.1.p1, GFFY01048496.1.p1, GFFY01058835.1.p1, GFFY01064781.1.p1, GFFY01105242.1.p1, GFFY01120278.1.p1	Thoc_c2323_g1_i1.p4, Thoc_c26018_g1_i1.p2, Thoc_c56194_g1_i1.p2	SEGI_02366, SEGI_02794, SEGI_05302, SEGI_07285, SEGI_08757, SEGI_08797, SEGI_09627, SEGI_10937, SEGI_12037, SEGI_12086, SEGI_14458, SEGI_14987, SEGI_15747, SEGI_15996, SEGI_16029, SEGI_16637, SEGI_17489, SEGI_18132, SEGI_19254, SEGI_20123, SEGI_20567, SEGI_20603, SEGI_21954, SEGI_23514, SEGI_25517, SEGI_27574, SEGI_28128, SEGI_28582, SEGI_28814, SEGI_28867, SEGI_28996, SEGI_29275, SEGI_30488, SEG…	SESE_016737, SESE_026877, SESE_027098, SESE_028304, SESE_028435, SESE_028486, SESE_028733, SESE_029306, SESE_030509, SESE_030838, SESE_030936, SESE_031966, SESE_033705, SESE_034300, SESE_034756, SESE_034770, SESE_035059, SESE_035726, SESE_036263, SESE_036443, SESE_036648, SESE_036900, SESE_037700, SESE_039599, SESE_040370, SESE_041777, SESE_041947, SESE_042595, SESE_043429, SESE_043509, SESE_0436…
OG0000051	GGJG01002620.1.p1, GGJG01004160.1.p1, GGJG01018935.1.p1, GGJG01024872.1.p1, GGJG01024986.1.p1, GGJG01031882.1.p1, GGJG01032247.1.p1, GGJG01035049.1.p1	evm_27.model.AmTr_v1.0_scaffold00018.111 pacid=31557446 transcript=evm_27.model.AmTr_v1.0_scaffold00018.111 locus=evm_27.TU.AmTr_v1.0_scaffold00018.111 ID=evm_27.model.AmTr_v1.0_scaffold00018.111.v1.0 annot-version=v1.0, evm_27.model.AmTr_v1.0_scaffold00018.113 pacid=31557472 transcript=evm_27.model.AmTr_v1.0_scaffold00018.113 locus=evm_27.TU.AmTr_v1.0_scaffold00018.113 ID=evm_27.model.AmTr_v1.0_…	GBYR01031183.1.p1, GBYR01037681.1.p1, GBYR01037686.1.p1, GBYR01039071.1.p1, GBYR01043983.1.p1, GHLL01091879.1.p1, GHLL01099611.1.p1, GHLL01110019.1.p1, GHLL01218961.1.p1, GHLL01229728.1.p1, GHLL01263447.1.p1, GHLL01274558.1.p1, GHLL01363730.1.p1, Gb_01972, Gb_06993, Gb_08708	TnS000332527t15, TnS000987187t07	Megl_c15209_g1_i2.p1, Megl_c25978_g1_i3.p2	GCHX01349797.1.p1, GCZO01202923.1.p1, GCZO01206940.1.p3, GCZO01208251.1.p1, GCZO01303559.1.p1, GCZO01309457.1.p1, gb|GFBZ01006832.1|.p1, gb|GFBZ01011796.1|.p1, gb|GFBZ01015921.1|.p1, gb|GFBZ01024328.1|.p1, gi|830827446|gb|GCZO01348691.1|.p1, gi|830829804|gb|GCZO01346335.1|.p1, gi|830833896|gb|GCZO01342243.1|.p1, gi|830858991|gb|GCZO01317153.1|.p1, gi|830896190|gb|GCZO01283983.1|.p2, gi|830896411|…	GGJJ01001254.1.p1, GGJJ01004337.1.p1, GGJJ01008964.1.p1, GGJJ01018983.1.p1, GGJJ01020118.1.p1, GGJJ01027502.1.p1, GGJJ01036025.1.p1, GGJJ01042840.1.p1	GDQR01011985.1.p1, GDQR01015211.1.p1, GFLL01037200.1.p1, GFLL01066753.1.p1, GFLL01152890.1.p1, GFLL01162522.1.p1	GGJH01000366.1.p1, GGJH01000490.1.p1, GGJH01025695.1.p1, GGJH01046607.1.p1	HAMI01001856.1.p1, HAMI01003690.1.p1, HAMI01008243.1.p1, HAMI01011716.1.p1, HAMI01012120.1.p1, HAMI01013769.1.p1, HAMI01017396.1.p1, HAMI01026076.1.p1, HAMI01039018.1.p1	GBLJ01005150.1.p1, GBLJ01006805.1.p1, GBLJ01025237.1.p1, gb|GESU01004811.1|.p1, gb|GESU01011267.1|.p1, gb|GESU01024508.1|.p1, gb|GESU01029900.1|.p1	PILA_02318, PILA_02855, PILA_03341, PILA_04440, PILA_05469, PILA_06919, PILA_06920, PILA_07322, PILA_07648, PILA_08253, PILA_09549, PILA_10851, PILA_11231, PILA_13572, PILA_16652, PILA_17738, PILA_17742, PILA_19305, PILA_19532, PILA_20172, PILA_20744, PILA_20747, PILA_21043, PILA_22012, PILA_22226, PILA_24083, PILA_24624, PILA_27903, PILA_29006, PILA_33621, PILA_33624, gb|GEUZ01000337.1|.p1, gb|G…	GAQR01006653.1.p3, GAQR01010198.1.p1, GAQR01041925.1.p1, GAQR01041930.1.p1, GAQR01052455.1.p1, GAQR01060040.1.p1, GFHB01019927.1.p1, GFHB01041366.1.p2, GFHB01122648.1.p1, GFHB01130935.1.p1, GFHB01133547.1.p1, GFHB01167854.1.p1, GFHB01184635.1.p1	GBQX01035588.1.p1, GBQX01042195.1.p1, GBQX01047404.1.p1, GBQX01047527.1.p1, GBQX01050540.1.p1	GECO01013289.1.p1, GECO01016922.1.p1, GECO01018897.1.p1, GECO01028531.1.p1, GECO01028792.1.p1, GECO01038922.1.p1, GECO01041671.1.p1, GECO01050242.1.p1, GGAU01014165.1.p4, GGAU01021129.1.p1, GGAU01024392.1.p3, GGAU01030954.1.p1, GGAU01038981.1.p1, GGAU01039392.1.p1, GGAU01039567.1.p1, GGAU01040297.1.p1, GGAU01046019.1.p2, GGAU01050446.1.p1	GGJK01000348.1.p1, GGJK01007430.1.p1, GGJK01010737.1.p1, GGJK01022615.1.p1, GGJK01026533.1.p1, GGJK01026814.1.p1, GGJK01028977.1.p1, GGJK01037935.1.p1, GGJK01038026.1.p1, GGJK01039667.1.p1	1A_I3_VO_L_1_T_82850_136734_1 C_0.000_Length_1519 type=cds; aalen=461_91%_complete; clen=1519; strand=+; offs=73-1458; evgclass=maina2_okay_match_1A_all_VO_L_2229_T_154_1360 C_0.002_Length_1511_pct_99_100;, 1A_I5_VO_L_573_T_48_73_1 C_0.260_Length_2132 type=cds; aalen=545_76%_complete; clen=2132; strand=-; offs=1897-260; evgclass=main_okay_match_2A_all_VO_L_8618_T_72_79 C_0.130_Length_1979_pct_98_…	GFZL01017752.1.p1, GFZL01021058.1.p1, GFZL01022057.1.p1, GFZL01024241.1.p1, GFZL01024500.1.p1, GFZL01027333.1.p1	GAZW02007047.1.p1, GAZW02042058.1.p1, GAZW02042066.1.p2, GAZW02044210.1.p1, GAZW02074987.1.p1, GAZW02088793.1.p1, GAZW02090603.1.p1, GAZW02090605.1.p1, GAZW02102360.1.p1, GFFY01087439.1.p1, PSME_00028, PSME_00075, PSME_02045, PSME_03026, PSME_08491, PSME_09178, PSME_09259, PSME_11640, PSME_13253, PSME_14218, PSME_15091, PSME_15175, PSME_18479, PSME_18536, PSME_18592, PSME_19020, PSME_21809, PSME_…	Thoc_c20004_g1_i1.p1, Thoc_c24340_g1_i2.p2, Thoc_c25218_g2_i2.p1, Thoc_c25218_g2_i3.p1, Thoc_c29293_g1_i1.p1, Thoc_c29357_g1_i1.p1, Thoc_c29357_g1_i1.p2, Thoc_c35555_g1_i1.p1, Thoc_c46855_g1_i1.p1	SEGI_02890, SEGI_05932, SEGI_06002, SEGI_07184, SEGI_07579, SEGI_07761, SEGI_08181, SEGI_10563, SEGI_10984, SEGI_11153, SEGI_15971, SEGI_17488, SEGI_18247, SEGI_24968, SEGI_27486, SEGI_28349, SEGI_28727, SEGI_30815, SEGI_30819, SEGI_31053, SEGI_31068, SEGI_33838, SEGI_35852, SEGI_36494, SEGI_36699, SEGI_37504, SEGI_39070, SEGI_39930, SEGI_40322, SEGI_41515	SESE_005975, SESE_026109, SESE_026141, SESE_028448, SESE_028568, SESE_032305, SESE_033903, SESE_035572, SESE_036251, SESE_041210, SESE_056199, SESE_056224, SESE_056875, SESE_057616, SESE_057658, SESE_057667, SESE_059387, SESE_060041, SESE_063152, SESE_065778, SESE_067703, SESE_069638, SESE_071312, SESE_071781, SESE_072996, SESE_073327, SESE_073420, SESE_074555, SESE_076463, SESE_076968, SESE_0777…
OG0000052	GGJG01019792.1.p1, GGJG01020447.1.p1, GGJG01024342.1.p1, GGJG01026491.1.p1, GGJG01026522.1.p1, GGJG01034811.1.p1, GGJG01035661.1.p1	evm_27.model.AmTr_v1.0_scaffold00006.128 pacid=31560474 transcript=evm_27.model.AmTr_v1.0_scaffold00006.128 locus=evm_27.TU.AmTr_v1.0_scaffold00006.128 ID=evm_27.model.AmTr_v1.0_scaffold00006.128.v1.0 annot-version=v1.0, evm_27.model.AmTr_v1.0_scaffold00006.256 pacid=31560458 transcript=evm_27.model.AmTr_v1.0_scaffold00006.256 locus=evm_27.TU.AmTr_v1.0_scaffold00006.256 ID=evm_27.model.AmTr_v1.0_…	GBYR01031289.1.p1, GBYR01031294.1.p1, GBYR01037140.1.p1, GBYR01037248.1.p1, GGBW01021360.1.p1, GGBW01021364.1.p2, GGBW01021365.1.p1, GGBW01048848.1.p1, GHLL01222204.1.p1, GHLL01222205.1.p1, Gb_08485, Gb_24280	TnS000883697t06, TnS000994691t01	Megl_c18678_g1_i1.p1, Megl_c28287_g5_i1.p1	GCHX01049950.1.p1, GCHX01148516.1.p1, GCHX01152807.1.p1, GCHX01246357.1.p1, GCHX01254252.1.p1, GCZO01000393.1.p1, GCZO01201207.1.p1, GCZO01208911.1.p1, gb|GFBZ01001289.1|.p1, gb|GFBZ01004303.1|.p1, gb|GFBZ01004623.1|.p1, gb|GFBZ01010923.1|.p1, gb|GFBZ01016803.1|.p1, gb|GFBZ01022565.1|.p1, gi|830837716|gb|GCZO01338423.1|.p1, gi|830861675|gb|GCZO01314469.1|.p1, gi|830888301|gb|GCZO01291872.1|.p1, g…	GGJJ01000717.1.p1, GGJJ01003501.1.p1, GGJJ01003502.1.p1, GGJJ01003892.1.p1, GGJJ01006804.1.p1, GGJJ01009173.1.p1, GGJJ01012920.1.p1, GGJJ01021354.1.p1, GGJJ01022127.1.p1, GGJJ01026758.1.p1, GGJJ01027295.1.p1, GGJJ01031125.1.p1, GGJJ01032440.1.p1, GGJJ01033049.1.p1, GGJJ01033433.1.p1, GGJJ01037466.1.p1, GGJJ01040016.1.p1, GGJJ01043810.1.p1, GGJJ01052235.1.p1, GGJJ01057355.1.p1	GDQR01001785.1.p1, GDQR01010395.1.p1, GDQR01011406.1.p1, GFLL01020542.1.p1, GFLL01081025.1.p1, GFLL01118196.1.p1, GFLL01118197.1.p1, GFLL01136707.1.p1, GFLL01136708.1.p1, GFLL01139620.1.p1, GFLL01140852.1.p1, GFLL01140881.1.p1, GFLL01171148.1.p1, gb|GFBO01002780.1|.p1, gb|GFBO01004958.1|.p1, gb|GFBO01082858.1|.p1, gb|GFBO01082861.1|.p1, gb|GFBO01093109.1|.p1	GGJH01016274.1.p1, GGJH01022071.1.p1, GGJH01026015.1.p1, GGJH01027202.1.p1, GGJH01032677.1.p1, GGJH01037406.1.p1, GGJH01040260.1.p1, GGJH01043243.1.p1	HAMI01002287.1.p1, HAMI01006945.1.p1, HAMI01009674.1.p1, HAMI01014358.1.p1, HAMI01020412.1.p1, HAMI01029056.1.p1, HAMI01040110.1.p1	GBLJ01000411.1.p1, GBLJ01001293.1.p1, GBLJ01004438.1.p1, GBLJ01011049.1.p1, GBLJ01018024.1.p1, GBLJ01022367.1.p1, GBLJ01034459.1.p1, GBLJ01036127.1.p1, gb|GESU01011161.1|.p1, gb|GESU01011162.1|.p1, gb|GESU01014569.1|.p1, gb|GESU01018054.1|.p2, gb|GESU01022181.1|.p1, gb|GESU01025600.1|.p1, gb|GESU01034319.1|.p1	PILA_01658, PILA_01661, PILA_02467, PILA_02468, PILA_04805, PILA_09064, PILA_09918, PILA_15679, PILA_15684, PILA_18139, PILA_22475, PILA_23369, PILA_23394, PILA_23471, PILA_24245, PILA_25042, PILA_25724, PILA_26578, PILA_28947, PILA_30301, PILA_33221, PILA_37855, PILA_37859, PILA_38034, gb|GEUZ01001072.1|.p1, gb|GEUZ01001233.1|.p1, gb|GEUZ01002656.1|.p1, gb|GEUZ01013018.1|.p1, gb|GEUZ01017308.1|.…	GAQR01008642.1.p1, GAQR01009234.1.p3, GAQR01009235.1.p3, GAQR01017094.1.p1, GAQR01023572.1.p2, GAQR01033152.1.p1, GAQR01052262.1.p1, GFHB01017077.1.p1, GFHB01025133.1.p1, GFHB01109730.1.p1, GFHB01113670.1.p1, GFHB01115879.1.p1, GFHB01144459.1.p1, GFHB01150451.1.p1, GFHB01175091.1.p1, GFHB01190057.1.p1, GFHB01191679.1.p1	GBQX01029306.1.p1, GBQX01033711.1.p1, GBQX01036309.1.p1, GBQX01042690.1.p1, GBQX01043063.1.p1, GBQX01044153.1.p1, GBQX01044897.1.p1, GBQX01048071.1.p1, GBQX01050897.1.p1, GBQX01053539.1.p1, GDQD01005693.1.p1, GDQD01006598.1.p1	GECO01004265.1.p1, GECO01005837.1.p1, GECO01010943.1.p1, GECO01011195.1.p1, GECO01013703.1.p1, GECO01014269.1.p1, GECO01015500.1.p1, GECO01016663.1.p1, GECO01019467.1.p1, GECO01021731.1.p1, GECO01029668.1.p1, GECO01046922.1.p1, GECO01048144.1.p1, GECO01049364.1.p1, GECO01049759.1.p1, GGAU01027763.1.p3, GGAU01028975.1.p1, GGAU01039962.1.p1, GGAU01040275.1.p4, GGAU01043662.1.p6, GGAU01044286.1.p4, …	GGJK01002604.1.p1, GGJK01017559.1.p1, GGJK01020578.1.p1, GGJK01025645.1.p1, GGJK01035633.1.p1, GGJK01037136.1.p1, GGJK01043736.1.p1	1A_I11_VO_L_1_T_124344_226447_1 C_0.000_Length_2066 type=cds; aalen=281_40%_complete-utrpoor; clen=2066; strand=-; offs=1266-421; evgclass=main_okay_match_1A_I11_VO_L_1_T_124207_226447 C_0.000_Length_1564_pct_99_100;, 1A_I3_VO_L_2502_T_169_195_1 C_0.116_Length_1180 type=cds; aalen=270_68%_complete; clen=1180; strand=-; offs=1168-356; evgclass=main_okay_match_1A_I3_VO_L_2502_T_170_195 C_0.120_Leng…	GFZL01001066.1.p1, GFZL01003064.1.p1, GFZL01004758.1.p1, GFZL01009301.1.p1, GFZL01011484.1.p1, GFZL01012832.1.p1, GFZL01015237.1.p1, GFZL01015736.1.p1, GFZL01016606.1.p1, GFZL01016607.1.p1, GFZL01017509.1.p1, GFZL01019504.1.p1, GFZL01020055.1.p1, GFZL01020060.1.p1, GFZL01020488.1.p1, GFZL01021115.1.p1, GFZL01024688.1.p1, GFZL01026043.1.p1, GFZL01026714.1.p1, GFZL01027508.1.p1	GAZW02017275.1.p1, GAZW02017277.1.p1, GAZW02017278.1.p1, GAZW02019699.1.p1, GAZW02019700.1.p1, GAZW02023503.1.p1, GAZW02026984.1.p1, GAZW02062080.1.p1, GAZW02062081.1.p1, GAZW02103866.1.p1, GAZW02104063.1.p1, GFFY01002236.1.p1, GFFY01003713.1.p1, GFFY01004022.1.p1, GFFY01005220.1.p1, GFFY01008153.1.p1, GFFY01010228.1.p1, GFFY01012571.1.p1, GFFY01016024.1.p1, GFFY01019061.1.p1, GFFY01044136.1.p1, …	Thoc_c10674_g1_i1.p1, Thoc_c18726_g3_i1.p2, Thoc_c26005_g1_i1.p1, Thoc_c29066_g2_i1.p1	SEGI_02472, SEGI_03287, SEGI_06424, SEGI_16905, SEGI_27137, SEGI_28700, SEGI_32985, SEGI_39304, SEGI_39747	SESE_032146, SESE_046965, SESE_047368, SESE_048393, SESE_049660, SESE_050144, SESE_051970, SESE_052083, SESE_053072, SESE_065667, SESE_086203, SESE_091221, SESE_093383, SESE_098457, SESE_101435, SESE_103188, SESE_103395, SESE_109640, SESE_113965, SESE_125851, SESE_126408, SESE_129223, SESE_129611, SESE_132508, SESE_133245, SESE_136550, SESE_138808, SESE_140275, SESE_141125, SESE_143701, SESE_1446…
OG0000053	GGJG01003469.1.p1, GGJG01010402.1.p1, GGJG01018529.1.p1, GGJG01019616.1.p2, GGJG01020924.1.p1, GGJG01021598.1.p1, GGJG01024203.1.p1, GGJG01026773.1.p1, GGJG01030416.1.p1	evm_27.model.AmTr_v1.0_scaffold00019.61 pacid=31571941 transcript=evm_27.model.AmTr_v1.0_scaffold00019.61 locus=evm_27.TU.AmTr_v1.0_scaffold00019.61 ID=evm_27.model.AmTr_v1.0_scaffold00019.61.v1.0 annot-version=v1.0, evm_27.model.AmTr_v1.0_scaffold00054.27 pacid=31564519 transcript=evm_27.model.AmTr_v1.0_scaffold00054.27 locus=evm_27.TU.AmTr_v1.0_scaffold00054.27 ID=evm_27.model.AmTr_v1.0_scaffol…	GBYR01008208.1.p1, GBYR01032275.1.p1, GBYR01038737.1.p1, GBYR01038738.1.p1, GGBW01008997.1.p1, GGBW01026545.1.p1, GGBW01039511.1.p2, GGBW01039512.1.p1, GGBW01052206.1.p1, GHLL01150591.1.p1, Gb_01314, Gb_01342, Gb_10650, Gb_39767	TnS000111155t01, TnS000111155t05, TnS000171755t03, TnS000207955t07, TnS000451755t01, TnS000682719t01, TnS000723229t01, TnS000755211t03, TnS000839827t02, TnS000839827t03, TnS000893669t02	Megl_c17492_g1_i1.p1, Megl_c27049_g1_i1.p1, Megl_c27954_g3_i2.p1, Megl_c28505_g2_i1.p1, Megl_c28565_g1_i2.p3	GCHX01150809.1.p1, GCHX01151471.1.p1, GCHX01349851.1.p1, GCZO01308127.1.p1, gb|GFBZ01019880.1|.p1, gb|GFBZ01025194.1|.p1, gi|830828347|gb|GCZO01347790.1|.p1, gi|830836709|gb|GCZO01339430.1|.p1, gi|830863797|gb|GCZO01312347.1|.p1, gi|830882413|gb|GCZO01297759.1|.p1, gi|830899738|gb|GCZO01280436.1|.p1, gi|831055177|gb|GCZO01125270.1|.p1	GGJJ01003601.1.p1, GGJJ01010615.1.p1, GGJJ01019519.1.p1, GGJJ01022787.1.p1, GGJJ01023610.1.p1, GGJJ01027807.1.p1, GGJJ01028210.1.p1, GGJJ01032321.1.p1, GGJJ01035017.1.p1, GGJJ01046069.1.p1	GDQR01001693.1.p1, GDQR01003428.1.p1, GDQR01007066.1.p1, GDQR01014181.1.p1, GDQR01020765.1.p1, GFLL01010437.1.p1, GFLL01064752.1.p1, GFLL01068536.1.p1, GFLL01074871.1.p1, GFLL01080311.1.p1, GFLL01080312.1.p1, GFLL01099036.1.p1, GFLL01099046.1.p1, GFLL01132893.1.p1, GFLL01132902.1.p1, GFLL01132903.1.p1, GFLL01149721.1.p1, gb|GFBO01062921.1|.p1, gb|GFBO01093797.1|.p1	GGJH01001050.1.p1, GGJH01003322.1.p1, GGJH01010605.1.p1, GGJH01013741.1.p1, GGJH01018056.1.p1, GGJH01026117.1.p1, GGJH01026447.1.p1, GGJH01027796.1.p1, GGJH01040591.1.p1, GGJH01047117.1.p1	HAMI01001386.1.p1, HAMI01002776.1.p1, HAMI01006711.1.p1, HAMI01012216.1.p1, HAMI01012796.1.p1, HAMI01013463.1.p1, HAMI01017343.1.p1, HAMI01018153.1.p1, HAMI01022385.1.p1, HAMI01025500.1.p1, HAMI01027148.1.p1, HAMI01027251.1.p1, HAMI01027580.1.p1, HAMI01032426.1.p1, HAMI01038877.1.p1, HAMI01039506.1.p1	GBLJ01000925.1.p1, GBLJ01002321.1.p1, GBLJ01008108.1.p1, GBLJ01014191.1.p1, GBLJ01016802.1.p1, GBLJ01027519.1.p1, GBLJ01029136.1.p1, gb|GESU01021124.1|.p1, gb|GESU01038768.1|.p1	PILA_00123, PILA_02245, PILA_02327, PILA_03094, PILA_07610, PILA_11284, PILA_12281, PILA_14862, PILA_16440, PILA_16506, PILA_16616, PILA_22693, PILA_28630, gb|GEUZ01004079.1|.p1, gb|GEUZ01004235.1|.p1, gb|GEUZ01005450.1|.p1, gb|GEUZ01007168.1|.p1, gb|GEUZ01007648.1|.p1, gb|GEUZ01009881.1|.p1, gb|GEUZ01012317.1|.p1, gb|GEUZ01013245.1|.p1, gb|GEUZ01013978.1|.p1, gb|GEUZ01017311.1|.p1, gb|GEUZ010176…	GAQR01006940.1.p1, GAQR01010105.1.p1, GAQR01015849.1.p1, GAQR01017840.1.p1, GAQR01021616.1.p1, GAQR01031843.1.p1, GAQR01037315.1.p1, GAQR01037316.1.p1, GAQR01037317.1.p1, GAQR01048286.1.p1, GAQR01050488.1.p1, GFHB01035516.1.p1, GFHB01061339.1.p1	GBQX01032175.1.p1, GBQX01033836.1.p1, GBQX01036400.1.p1, GBQX01037377.1.p1, GBQX01038756.1.p1, GBQX01051224.1.p1, GDQD01006623.1.p1, GDQD01007633.1.p1	GECO01004880.1.p1, GECO01008376.1.p1, GECO01011000.1.p1, GECO01017519.1.p1, GECO01018366.1.p1, GECO01018367.1.p1, GECO01026233.1.p1, GECO01026889.1.p1, GECO01030711.1.p1, GECO01036847.1.p1, GGAU01008444.1.p1, GGAU01010271.1.p2, GGAU01042175.1.p3, GGAU01049803.1.p1	GGJK01000988.1.p1, GGJK01003005.1.p1, GGJK01003006.1.p1, GGJK01009501.1.p1, GGJK01012285.1.p1, GGJK01015733.1.p1, GGJK01016751.1.p1, GGJK01016930.1.p1, GGJK01022066.1.p1, GGJK01022299.1.p1, GGJK01030082.1.p1, GGJK01034181.1.p1, GGJK01034899.1.p1, GGJK01035606.1.p1, GGJK01038015.1.p1	1A_I11_NT_comp46366_c0_seq7_1 type=cds; aalen=613_89%_complete; clen=2063; strand=-; offs=1968-127; evgclass=main_okay_match_1A_I11_NT_comp46366_c0_seq3_pct_99_89;, 1A_I11_VO_L_5646_T_2_3_1 C_0.333_Length_2149 type=cds; aalen=647_90%_complete; clen=2149; strand=-; offs=2067-124; evgclass=main_okay_match_1A_all_VO_L_81595_T_1_2 C_0.667_Length_2172_pct_99_100;, 1A_I3_VO_L_3001_T_11_14_1 C_0.207_Len…	GFZL01000310.1.p1, GFZL01001917.1.p1, GFZL01002093.1.p1, GFZL01005494.1.p1, GFZL01021274.1.p1, GFZL01021473.1.p1, GFZL01023290.1.p1, GFZL01024139.1.p1, GFZL01025311.1.p1, GFZL01027755.1.p1, GFZL01027756.1.p1	GAZW02047292.1.p1, GAZW02076423.1.p1, GAZW02077210.1.p1, GAZW02077212.1.p1, GAZW02092612.1.p1, GAZW02092613.1.p1, GAZW02092622.1.p1, GAZW02097589.1.p1, GAZW02103707.1.p1, GFFY01033004.1.p1, GFFY01045011.1.p1, GFFY01053223.1.p1, PSME_00012, PSME_00993, PSME_05428, PSME_05954, PSME_07333, PSME_10595, PSME_13932, PSME_23789, PSME_25989, PSME_40356, PSME_41217, PSME_44508	Thoc_c21482_g2_i1.p1, Thoc_c21731_g2_i1.p1, Thoc_c24196_g1_i2.p1, Thoc_c24335_g1_i2.p2, Thoc_c28607_g1_i1.p1, Thoc_c28607_g1_i3.p1, Thoc_c48604_g1_i1.p1	SEGI_01717, SEGI_04194, SEGI_09151, SEGI_10548, SEGI_10782, SEGI_12265, SEGI_15782, SEGI_16953, SEGI_17808, SEGI_18454, SEGI_18526, SEGI_21973, SEGI_24203, SEGI_24378, SEGI_24782, SEGI_26652, SEGI_27257, SEGI_27759, SEGI_28253, SEGI_28595, SEGI_32475, SEGI_34169, SEGI_35640	SESE_010648, SESE_015911, SESE_025411, SESE_026194, SESE_026235, SESE_027874, SESE_028333, SESE_028342, SESE_028788, SESE_029507, SESE_029690, SESE_030770, SESE_032395, SESE_033969, SESE_034501, SESE_038047, SESE_038232, SESE_038638, SESE_039961, SESE_040015, SESE_040100, SESE_042055, SESE_042296, SESE_059287, SESE_061183, SESE_061794, SESE_063100, SESE_063542, SESE_064664, SESE_067041, SESE_0670…
OG0000054	GGJG01014156.1.p1, GGJG01023956.1.p1, GGJG01024232.1.p1, GGJG01024992.1.p1, GGJG01031347.1.p1, GGJG01032564.1.p1, GGJG01034478.1.p1, GGJG01039782.1.p1, GGJG01044371.1.p1		GHLL01337886.1.p1, Gb_27443			GCHX01046840.1.p1, GCHX01150738.1.p1, GCHX01152888.1.p1, GCHX01248962.1.p1, GCHX01252084.1.p1, GCHX01347046.1.p1, GCHX01350694.1.p1, GCHX01351179.1.p1, GCHX01353938.1.p1, GCHX01449082.1.p1, GCHX01452683.1.p1, GCHX01453448.1.p1, GCZO01002921.1.p1, GCZO01007547.1.p1, GCZO01106428.1.p1, GCZO01208936.1.p1, GCZO01209580.1.p1, GCZO01304643.1.p1, GCZO01307969.1.p1, GCZO01308823.1.p1, gb|GFBZ01002524.1|.…	GGJJ01000368.1.p1, GGJJ01002868.1.p1, GGJJ01003891.1.p1, GGJJ01013879.1.p1, GGJJ01013880.1.p1, GGJJ01014389.1.p1, GGJJ01024334.1.p1, GGJJ01027353.1.p1, GGJJ01029994.1.p1, GGJJ01032445.1.p1, GGJJ01032635.1.p1, GGJJ01035495.1.p1, GGJJ01036602.1.p1, GGJJ01038097.1.p1, GGJJ01038562.1.p1, GGJJ01043491.1.p1	GDQR01000807.1.p1, GDQR01002327.1.p1, GDQR01005090.1.p1, GDQR01005957.1.p1, GDQR01007578.1.p1, GDQR01008274.1.p1, GDQR01008430.1.p1, GFLL01016546.1.p1, GFLL01031099.1.p1, GFLL01039799.1.p1, GFLL01044417.1.p1, GFLL01047565.1.p1, GFLL01049378.1.p3, GFLL01053908.1.p1, GFLL01055189.1.p1, GFLL01105082.1.p1, GFLL01105083.1.p1, GFLL01123540.1.p1, GFLL01128468.1.p1, GFLL01144819.1.p1, GFLL01149425.1.p1, …	GGJH01013735.1.p1, GGJH01015677.1.p1, GGJH01016183.1.p1, GGJH01021272.1.p2, GGJH01039725.1.p1, GGJH01042835.1.p1, GGJH01046441.1.p1		GBLJ01000222.1.p1, GBLJ01001734.1.p1, GBLJ01001881.1.p1, GBLJ01003016.1.p1, GBLJ01003801.1.p1, GBLJ01004585.1.p1, GBLJ01004604.1.p1, GBLJ01004664.1.p1, GBLJ01006929.1.p1, GBLJ01007106.1.p1, GBLJ01008987.1.p1, GBLJ01010126.1.p1, GBLJ01012322.1.p1, GBLJ01015746.1.p1, GBLJ01021582.1.p1, GBLJ01023193.1.p1, GBLJ01025871.1.p1, GBLJ01029621.1.p1, GBLJ01030782.1.p1, GBLJ01031332.1.p1, GBLJ01034933.1.p1, …	PILA_01405, PILA_01595, PILA_05058, PILA_05061, PILA_09266, PILA_14909, PILA_17082, PILA_19219, PILA_19222, PILA_20565, PILA_35317, PILA_35546, PILA_37742	GAQR01005742.1.p1, GAQR01030972.1.p1, GAQR01036110.1.p1, GAQR01036113.1.p1, GAQR01040179.1.p1, GAQR01040566.1.p1, GAQR01040569.1.p1, GAQR01047468.1.p1, GAQR01048677.1.p1, GAQR01052988.1.p1, GAQR01056032.1.p1, GAQR01056522.1.p1, GAQR01059753.1.p1, GFHB01002784.1.p1, GFHB01019574.1.p1, GFHB01028120.1.p1, GFHB01044651.1.p1, GFHB01082736.1.p1, GFHB01101753.1.p1, GFHB01108959.1.p1, GFHB01115802.1.p2, …	GBQX01024205.1.p1, GBQX01024277.1.p1, GBQX01046674.1.p1, GBQX01047742.1.p1, GDQD01007902.1.p1	GECO01000397.1.p2, GECO01000543.1.p1, GECO01002030.1.p1, GECO01002589.1.p1, GECO01002765.1.p1, GECO01006397.1.p1, GECO01006672.1.p1, GECO01010968.1.p1, GECO01012450.1.p1, GECO01014363.1.p1, GECO01015243.1.p1, GECO01015737.1.p1, GECO01016859.1.p1, GECO01017196.1.p1, GECO01017197.1.p1, GECO01018418.1.p1, GECO01019718.1.p1, GECO01021133.1.p1, GECO01021386.1.p1, GECO01022022.1.p1, GECO01022588.1.p1, …	GGJK01013428.1.p1, GGJK01014438.1.p1, GGJK01016268.1.p1, GGJK01016895.1.p1, GGJK01017156.1.p1, GGJK01017489.1.p1, GGJK01017704.1.p2, GGJK01018459.1.p1, GGJK01021600.1.p1, GGJK01023707.1.p1, GGJK01024094.1.p1, GGJK01025005.1.p1, GGJK01025890.1.p1, GGJK01025945.1.p1, GGJK01026036.1.p1, GGJK01028031.1.p1, GGJK01030688.1.p1, GGJK01038008.1.p1, GGJK01039970.1.p1, GGJK01040247.1.p1, GGJK01042848.1.p1, …	2A_I15_VO_L_5169_T_11_23_1 C_0.542_Length_2090 type=cds; aalen=603_86%_complete; clen=2090; strand=-; offs=1929-118; evgclass=main_okay_match_2A_I15_VO_L_5169_T_2_23 C_0.583_Length_2090_pct_99_100;, 2A_all_VO_L_11547_T_15_19_1 C_0.304_Length_2093 type=cds; aalen=605_86%_complete; clen=2093; strand=-; offs=2002-185; evgclass=main_okay_match_2A_all_VO_L_11547_T_12_19 C_0.391_Length_1769_pct_99_100;…		GAZW02010210.1.p1, GAZW02011521.1.p1, GAZW02015467.1.p1, GAZW02030769.1.p1, GAZW02033570.1.p1, GAZW02033573.1.p1, GAZW02038270.1.p1, GAZW02038271.1.p1, GAZW02038272.1.p1, GAZW02038274.1.p1, GAZW02038275.1.p1, GAZW02047320.1.p1, GAZW02047324.1.p1, GAZW02060787.1.p2, GAZW02060788.1.p1, GAZW02060789.1.p1, GAZW02062261.1.p1, GAZW02062263.1.p1, GAZW02062264.1.p1, GAZW02062266.1.p1, GAZW02063887.1.p2, …
OG0000055	GGJG01000396.1.p1, GGJG01010931.1.p1, GGJG01027683.1.p1, GGJG01033834.1.p1, GGJG01040334.1.p1	evm_27.model.AmTr_v1.0_scaffold00029.127 pacid=31549801 transcript=evm_27.model.AmTr_v1.0_scaffold00029.127 locus=evm_27.TU.AmTr_v1.0_scaffold00029.127 ID=evm_27.model.AmTr_v1.0_scaffold00029.127.v1.0 annot-version=v1.0, evm_27.model.AmTr_v1.0_scaffold00062.78 pacid=31557274 transcript=evm_27.model.AmTr_v1.0_scaffold00062.78 locus=evm_27.TU.AmTr_v1.0_scaffold00062.78 ID=evm_27.model.AmTr_v1.0_sca…				GCHX01045343.1.p1, GCHX01154993.1.p1, GCHX01346883.1.p1, GCHX01347536.1.p1, GCHX01348357.1.p1, GCHX01352369.1.p1, GCHX01353544.1.p1, GCHX01447373.1.p1, GCHX01453456.1.p1, GCZO01301476.1.p1, gb|GFBZ01014701.1|.p1, gb|GFBZ01021115.1|.p1, gi|830830637|gb|GCZO01345502.1|.p1, gi|830831709|gb|GCZO01344430.1|.p1, gi|830846638|gb|GCZO01329503.1|.p2, gi|830922020|gb|GCZO01258154.1|.p1, gi|830929242|gb|GCZ…	GGJJ01000854.1.p1, GGJJ01005584.1.p1, GGJJ01012313.1.p1, GGJJ01020198.1.p1, GGJJ01025079.1.p1, GGJJ01025499.1.p1, GGJJ01026871.1.p1, GGJJ01027501.1.p1, GGJJ01028133.1.p1, GGJJ01029592.1.p1, GGJJ01030725.1.p1, GGJJ01031270.1.p1, GGJJ01031516.1.p1, GGJJ01032318.1.p1, GGJJ01036506.1.p1, GGJJ01038961.1.p1, GGJJ01042004.1.p2, GGJJ01043349.1.p1, GGJJ01044004.1.p1, GGJJ01044702.1.p1, GGJJ01047409.1.p1, …	GDQR01006208.1.p1, GDQR01006796.1.p1, GDQR01009328.1.p1, GDQR01009336.1.p1, GDQR01009772.1.p1, GDQR01010293.1.p1, GDQR01010674.1.p1, GDQR01011939.1.p1, GDQR01015303.1.p1, GDQR01017364.1.p1, GDQR01020104.1.p1, GFLL01024840.1.p1, GFLL01072746.1.p1, GFLL01077438.1.p1, GFLL01088573.1.p1, GFLL01096825.1.p1, GFLL01096905.1.p1, GFLL01096911.1.p1, GFLL01108672.1.p1, GFLL01126796.1.p1, GFLL01126798.1.p1, …	GGJH01000914.1.p1, GGJH01016902.1.p1, GGJH01018383.1.p1, GGJH01019070.1.p1, GGJH01019071.1.p1, GGJH01025705.1.p1, GGJH01033914.1.p2, GGJH01034480.1.p1, GGJH01037582.1.p1, GGJH01038929.1.p1, GGJH01038932.1.p1, GGJH01040463.1.p1, GGJH01042654.1.p3, GGJH01042953.1.p1, GGJH01043573.1.p1, GGJH01045419.1.p1	HAMI01004774.1.p1, HAMI01007209.1.p1, HAMI01009691.1.p1, HAMI01022450.1.p1, HAMI01025068.1.p2	GBLJ01003712.1.p1, GBLJ01005151.1.p1, GBLJ01006924.1.p1, GBLJ01010431.1.p1, GBLJ01013356.1.p1, GBLJ01016014.1.p1, GBLJ01036526.1.p1, gb|GESU01004539.1|.p1, gb|GESU01011026.1|.p1, gb|GESU01011302.1|.p1, gb|GESU01011764.1|.p1, gb|GESU01014670.1|.p1, gb|GESU01018882.1|.p3, gb|GESU01020545.1|.p1, gb|GESU01022082.1|.p1, gb|GESU01024515.1|.p1, gb|GESU01025362.1|.p1, gb|GESU01043115.1|.p1, gb|GESU010434…	PILA_02185, PILA_03396, PILA_03980, PILA_07836, PILA_15849, PILA_23396, PILA_29910, PILA_30802, PILA_30913, PILA_31239, gb|GEUZ01004709.1|.p1, gb|GEUZ01005088.1|.p1, gb|GEUZ01005694.1|.p1, gb|GEUZ01007383.1|.p1, gb|GEUZ01007646.1|.p1, gb|GEUZ01008268.1|.p1, gb|GEUZ01008953.1|.p1, gb|GEUZ01009326.1|.p1, gb|GEUZ01010696.1|.p1, gb|GEUZ01010847.1|.p1, gb|GEUZ01011014.1|.p1, gb|GEUZ01013349.1|.p1, gb|…	GAQR01000049.1.p1, GAQR01000424.1.p1, GAQR01010133.1.p1, GAQR01010528.1.p1, GAQR01014924.1.p1, GAQR01037272.1.p1, GAQR01041613.1.p1, GAQR01044720.1.p1, GAQR01044727.1.p1, GAQR01047185.1.p1, GAQR01048459.1.p1, GFHB01007377.1.p1, GFHB01010046.1.p1, GFHB01021145.1.p1, GFHB01028032.1.p1, GFHB01086150.1.p1, GFHB01112451.1.p1, GFHB01116423.1.p1, GFHB01118816.1.p1, GFHB01157424.1.p1, GFHB01159782.1.p1, …	GBQX01024723.1.p1, GBQX01025685.1.p1, GBQX01026045.1.p1, GBQX01028091.1.p1, GBQX01035531.1.p2, GBQX01051174.1.p1, GDQD01000157.1.p1	GECO01003919.1.p1, GECO01004195.1.p1, GECO01004750.1.p1, GECO01005402.1.p1, GECO01005736.1.p1, GECO01007525.1.p1, GECO01009889.1.p1, GECO01009891.1.p1, GECO01010459.1.p1, GECO01010908.1.p1, GECO01011740.1.p2, GECO01012867.1.p1, GECO01013186.1.p1, GECO01013483.1.p1, GECO01015197.1.p1, GECO01017704.1.p1, GECO01017863.1.p1, GECO01018608.1.p1, GECO01021556.1.p1, GECO01021557.1.p1, GECO01022102.1.p1, …	GGJK01005674.1.p1, GGJK01006973.1.p1, GGJK01019696.1.p1, GGJK01020330.1.p2, GGJK01021618.1.p1, GGJK01022191.1.p1, GGJK01023786.1.p1, GGJK01024482.1.p1, GGJK01024669.1.p1, GGJK01026473.1.p1, GGJK01026874.1.p1, GGJK01027499.1.p1, GGJK01028493.1.p1, GGJK01028785.1.p1, GGJK01030036.1.p1, GGJK01032242.1.p1, GGJK01039422.1.p1	1A_I11_VO_L_2571_T_213_243_1 C_0.071_Length_722 type=cds; aalen=209_87%_complete; clen=722; strand=-; offs=654-25; evgclass=main_okay_match_1A_I11_VO_L_2571_T_201_243 C_0.090_Length_676_pct_99_79;, 1A_I11_VO_L_2571_T_222_243_1 C_0.076_Length_670 type=cds; aalen=173_77%_complete; clen=670; strand=-; offs=523-2; evgclass=main_okay_match_1A_I11_VO_L_2571_T_240_243 C_0.073_Length_622_pct_99_88;, 1A_I…	GFZL01000732.1.p1, GFZL01011840.1.p1, GFZL01013418.1.p2, GFZL01013551.1.p1, GFZL01016793.1.p1, GFZL01017236.1.p1, GFZL01017260.1.p1, GFZL01018844.1.p1, GFZL01018887.1.p1, GFZL01020209.1.p1, GFZL01021518.1.p1, GFZL01022263.1.p1, GFZL01022387.1.p1, GFZL01025592.1.p1, GFZL01025655.1.p1, GFZL01025761.1.p1, GFZL01025771.1.p1	GAZW02015753.1.p1, GAZW02021248.1.p1, GAZW02037756.1.p1, GAZW02056195.1.p1, GAZW02068074.1.p1, GAZW02069772.1.p1, GAZW02069776.1.p1, GAZW02091167.1.p2, GAZW02091170.1.p1, GAZW02098470.1.p1, GAZW02100605.1.p1, GAZW02102034.1.p1, GFFY01000102.1.p1, GFFY01006018.1.p1, GFFY01006297.1.p1, GFFY01006728.1.p1, GFFY01013900.1.p1, GFFY01015505.1.p2, GFFY01018716.1.p1, GFFY01019929.1.p1, GFFY01020336.1.p1, …
OG0000056	GGJG01026551.1.p1, GGJG01029947.1.p1		GBYR01012724.1.p1, GBYR01021103.1.p1, GBYR01037597.1.p1, GBYR01047791.1.p1, GBYR01065476.1.p1, GGBW01003721.1.p2, GGBW01010028.1.p1, GGBW01010108.1.p1, GGBW01010110.1.p1, GGBW01023530.1.p1, GGBW01036098.1.p1, GGBW01073291.1.p1, GHLL01112054.1.p1, GHLL01128625.1.p1, GHLL01139604.1.p1, GHLL01146365.1.p1, GHLL01151622.1.p1, GHLL01182408.1.p1, GHLL01212514.1.p1, GHLL01217446.1.p1, GHLL01237747.1.p1, …			GCHX01045689.1.p1, GCHX01045903.1.p1, GCHX01145979.1.p1, GCHX01148215.1.p1, GCHX01151102.1.p1, GCHX01151669.1.p1, GCHX01245960.1.p1, GCHX01354042.1.p3, GCHX01445373.1.p1, GCZO01000585.1.p1, GCZO01003310.1.p1, GCZO01005869.1.p1, GCZO01008177.1.p1, GCZO01100570.1.p1, GCZO01204343.1.p1, gb|GFBZ01014768.1|.p1, gb|GFBZ01015266.1|.p1, gi|830834245|gb|GCZO01341894.1|.p5, gi|830863341|gb|GCZO01312803.1|.…	GGJJ01027792.1.p1, GGJJ01031892.1.p1, GGJJ01036198.1.p1, GGJJ01045011.1.p1, GGJJ01047716.1.p1	GFLL01017769.1.p1, GFLL01137711.1.p1, GFLL01175116.1.p1, gb|GFBO01030995.1|.p1		HAMI01011045.1.p1	GBLJ01023693.1.p1, GBLJ01026719.1.p1, GBLJ01027957.1.p1, GBLJ01030539.1.p1, GBLJ01030760.1.p1, GBLJ01036763.1.p1, GBLJ01040502.1.p1, GBLJ01044158.1.p1, gb|GESU01000132.1|.p2, gb|GESU01039521.1|.p1, gb|GESU01043236.1|.p1	PILA_03498, PILA_22430, PILA_25188, PILA_30631, PILA_31013, PILA_33569, PILA_35240, gb|GEUZ01008830.1|.p1, gb|GEUZ01012773.1|.p1	GFHB01024468.1.p1, GFHB01040264.1.p1, GFHB01104350.1.p1	GBQX01016676.1.p1, GBQX01049051.1.p1, GBQX01051429.1.p1, GDQD01010227.1.p1	GECO01006667.1.p1, GECO01007430.1.p1, GECO01012607.1.p1, GECO01019214.1.p1, GECO01026306.1.p1, GGAU01011348.1.p1, GGAU01016030.1.p2, GGAU01016762.1.p2, GGAU01018225.1.p2, GGAU01018317.1.p2, GGAU01022569.1.p2, GGAU01037799.1.p1, GGAU01038058.1.p2, GGAU01038077.1.p2, GGAU01047418.1.p1, GGAU01048925.1.p1, GGAU01049775.1.p2, GGAU01051500.1.p1, GGAU01052501.1.p1, GGAU01052504.1.p2	GGJK01036754.1.p3	2A_I13_VO_L_1_T_28608_181601_1 C_0.000_Length_2443 type=cds; aalen=719_88%_complete; clen=2443; strand=+; offs=209-2368; evgclass=main_okay_match_2A_I13_VO_L_1_T_28612_181601 C_0.000_Length_1987_pct_99_100;, 2A_I15_VO_L_1_T_40308_133144_1 C_0.000_Length_562 type=cds; aalen=174_93%_complete; clen=562; strand=-; offs=541-17; evgclass=main_okay_match_2A_I15_VO_L_1_T_41832_133144 C_0.000_Length_450_p…	GFZL01009182.1.p1, GFZL01009741.1.p1, GFZL01011480.1.p1, GFZL01014054.1.p1, GFZL01014056.1.p1, GFZL01014567.1.p1, GFZL01015438.1.p1, GFZL01015645.1.p1, GFZL01016140.1.p1, GFZL01017905.1.p1, GFZL01019366.1.p1, GFZL01019659.1.p1, GFZL01021193.1.p2, GFZL01021525.1.p1, GFZL01024445.1.p1	GAZW02001928.1.p1, GAZW02006123.1.p1, GAZW02032254.1.p1, GAZW02051213.1.p1, GFFY01009946.1.p1, GFFY01027693.1.p1, GFFY01039456.1.p1, GFFY01056400.1.p1, GFFY01059663.1.p1, GFFY01069746.1.p1, GFFY01096689.1.p1, GFFY01098269.1.p1, GFFY01109965.1.p1, GFFY01129712.1.p1, GFFY01136003.1.p1, PSME_02206, PSME_02302, PSME_02702, PSME_04086, PSME_04791, PSME_05056, PSME_06210, PSME_06529, PSME_07293, PSME_0…	Thoc_c28110_g3_i1.p5, Thoc_c8324_g1_i1.p1	SEGI_00542, SEGI_02463, SEGI_03597, SEGI_06503, SEGI_16706, SEGI_18945, SEGI_24522, SEGI_26538, SEGI_28409, SEGI_37065, SEGI_39849	SESE_033636, SESE_037531, SESE_039898, SESE_042817, SESE_045174, SESE_045296, SESE_046428, SESE_049061, SESE_051182, SESE_056954, SESE_058508, SESE_058601, SESE_058853, SESE_059581, SESE_060750, SESE_060812, SESE_061260, SESE_062880, SESE_062954, SESE_063112, SESE_063937, SESE_065775, SESE_066615, SESE_067647, SESE_067696, SESE_068112, SESE_068134, SESE_068349, SESE_069543, SESE_070381, SESE_0719…
OG0000057	GGJG01031836.1.p1, GGJG01045126.1.p1		GGBW01009466.1.p1, GHLL01028407.1.p1, GHLL01058121.1.p1, GHLL01098548.1.p1, GHLL01108982.1.p1, GHLL01159818.1.p1, GHLL01185999.1.p1, GHLL01189332.1.p2, GHLL01242765.1.p1, GHLL01261914.1.p1, GHLL01277073.1.p1, GHLL01292234.1.p1, GHLL01315257.1.p1, GHLL01373579.1.p1, GHLL01507652.1.p1, GHLL01655213.1.p1, GHLL01681901.1.p1, Gb_18650			GCHX01047495.1.p1, GCHX01053443.1.p1, GCHX01053512.1.p1, GCHX01054850.1.p1, GCHX01054904.1.p1, GCHX01246901.1.p1, GCHX01247545.1.p1, GCHX01253063.1.p1, GCHX01345188.1.p1, GCHX01347972.1.p1, GCHX01448726.1.p1, GCZO01004268.1.p1, GCZO01006727.1.p1, GCZO01008555.1.p1, GCZO01102499.1.p1, GCZO01201353.1.p1, GCZO01204860.1.p1, gb|GFBZ01006466.1|.p1, gb|GFBZ01011019.1|.p1, gb|GFBZ01018219.1|.p1, gi|8309…	GGJJ01024502.1.p3, GGJJ01028735.1.p1, GGJJ01036367.1.p1, GGJJ01048355.1.p1, GGJJ01048357.1.p1	GFLL01003394.1.p1, GFLL01004587.1.p1, GFLL01025923.1.p1, GFLL01031353.1.p1, GFLL01059740.1.p1, GFLL01071854.1.p1, GFLL01073373.1.p1, GFLL01095486.1.p1, GFLL01152698.1.p1, GFLL01181421.1.p1, gb|GFBO01079748.1|.p1	GGJH01017028.1.p1, GGJH01018197.1.p1	HAMI01025647.1.p1, HAMI01037504.1.p1	GBLJ01004487.1.p1, GBLJ01012181.1.p1, GBLJ01028665.1.p1, GBLJ01031722.1.p1, GBLJ01045814.1.p1, gb|GESU01043964.1|.p1	PILA_02434, PILA_05311, PILA_13313, PILA_19969, PILA_21925, PILA_21998, PILA_25171, PILA_25542, PILA_25810, PILA_28449, PILA_29665, PILA_37123, gb|GEUZ01008164.1|.p1, gb|GEUZ01013031.1|.p1, gb|GEUZ01013162.1|.p1, gb|GEUZ01017654.1|.p1, gb|GEUZ01017833.1|.p1, gb|GEUZ01021181.1|.p1, gb|GEUZ01021637.1|.p1, gb|GEUZ01024540.1|.p1	GFHB01176241.1.p1, GFHB01192738.1.p1	GDQD01000459.1.p1, GDQD01001702.1.p1	GECO01002717.1.p1, GECO01028170.1.p1, GGAU01037897.1.p2, GGAU01037913.1.p1		1A_all_NT_comp113933_c1_seq4_1 type=cds; aalen=1174_87%_complete; clen=4032; strand=+; offs=71-3595; evgclass=main_okay_match_1A_I3_VO_L_452_T_272_333 C_0.086_Length_2323_pct_98_94;, 1A_all_VO_L_41946_T_3_9_1 C_0.364_Length_559 type=cds; aalen=182_98%_complete; clen=559; strand=-; offs=556-8; evgclass=main_okay_match_1A_all_VO_L_41946_T_1_9 C_0.182_Length_414_pct_98_100;, 1A_all_VO_L_92971_T_3_3_…	GFZL01011281.1.p1, GFZL01018543.1.p1, GFZL01019526.1.p1, GFZL01021349.1.p1, GFZL01025964.1.p1	GAZW02002044.1.p1, GAZW02004810.1.p1, GAZW02009626.1.p1, GAZW02009637.1.p1, GAZW02010511.1.p1, GAZW02014684.1.p1, GAZW02018851.1.p1, GAZW02042803.1.p1, GAZW02049789.1.p1, GAZW02056338.1.p1, GAZW02056339.1.p1, GAZW02062029.1.p1, GFFY01000560.1.p1, GFFY01003386.1.p1, GFFY01005046.1.p1, GFFY01007276.1.p1, GFFY01007588.1.p1, GFFY01013745.1.p1, GFFY01028992.1.p2, GFFY01031700.1.p1, GFFY01033370.1.p1, …	Thoc_c20673_g1_i1.p1, Thoc_c36088_g1_i1.p1	SEGI_00703, SEGI_04532, SEGI_09206, SEGI_09906, SEGI_17348, SEGI_19675, SEGI_20273, SEGI_21279, SEGI_31026, SEGI_32779, SEGI_40335	SESE_025654, SESE_026072, SESE_026101, SESE_028833, SESE_029328, SESE_029454, SESE_029960, SESE_032604, SESE_032913, SESE_034991, SESE_036817, SESE_037549, SESE_037655, SESE_038145, SESE_038271, SESE_039459, SESE_039734, SESE_040285, SESE_041847, SESE_042362, SESE_042544, SESE_042853, SESE_043396, SESE_043442, SESE_043924, SESE_044177, SESE_044400, SESE_044879, SESE_045121, SESE_045247, SESE_0456…
OG0000058	GGJG01001424.1.p1, GGJG01001868.1.p1, GGJG01001869.1.p1, GGJG01002100.1.p1, GGJG01008070.1.p1, GGJG01009024.1.p1, GGJG01009300.1.p1, GGJG01013933.1.p1, GGJG01014024.1.p1, GGJG01015218.1.p1, GGJG01033469.1.p1, GGJG01045303.1.p1	evm_27.model.AmTr_v1.0_scaffold00033.23 pacid=31561872 transcript=evm_27.model.AmTr_v1.0_scaffold00033.23 locus=evm_27.TU.AmTr_v1.0_scaffold00033.23 ID=evm_27.model.AmTr_v1.0_scaffold00033.23.v1.0 annot-version=v1.0, evm_27.model.AmTr_v1.0_scaffold00033.24 pacid=31561801 transcript=evm_27.model.AmTr_v1.0_scaffold00033.24 locus=evm_27.TU.AmTr_v1.0_scaffold00033.24 ID=evm_27.model.AmTr_v1.0_scaffol…	GBYR01007228.1.p1, GGBW01009716.1.p1, GHLL01645511.1.p1, Gb_25231, Gb_31148	TnS000081733t01, TnS000113183t05, TnS000186713t05, TnS000220955t01, TnS000259729t01, TnS000259729t02, TnS000259729t03, TnS000270331t02, TnS000408583t06, TnS000478731t01, TnS000492411t01	Megl_c21701_g1_i2.p1, Megl_c27758_g1_i2.p1, Megl_c27758_g1_i3.p1, Megl_c28391_g1_i2.p1	GCHX01348574.1.p1, GCHX01352683.1.p1, GCHX01353477.1.p1, GCZO01005323.1.p2, GCZO01206049.1.p1, gi|830829908|gb|GCZO01346231.1|.p1	GGJJ01000307.1.p1, GGJJ01001460.1.p1, GGJJ01001918.1.p1, GGJJ01002160.1.p1, GGJJ01008228.1.p1, GGJJ01009190.1.p1, GGJJ01009191.1.p1, GGJJ01010077.1.p1, GGJJ01021565.1.p1, GGJJ01033210.1.p1, GGJJ01044692.1.p1	GDQR01006483.1.p1, GDQR01006893.1.p1, GDQR01006937.1.p1, GDQR01018656.1.p1, GFLL01060937.1.p1, GFLL01074703.1.p1, GFLL01108300.1.p1, gb|GFBO01049775.1|.p1	GGJH01005755.1.p1, GGJH01007206.1.p1, GGJH01014181.1.p1, GGJH01015072.1.p1, GGJH01016331.1.p1, GGJH01019820.1.p1, GGJH01026312.1.p1, GGJH01031795.1.p1, GGJH01040622.1.p1, GGJH01046679.1.p1	HAMI01000273.1.p1, HAMI01003928.1.p1, HAMI01011078.1.p1, HAMI01015042.1.p1, HAMI01015354.1.p1, HAMI01019450.1.p1, HAMI01021835.1.p1, HAMI01023591.1.p1, HAMI01027814.1.p1, HAMI01039008.1.p1, HAMI01039009.1.p1	GBLJ01006921.1.p1, GBLJ01017834.1.p1, gb|GESU01003780.1|.p1, gb|GESU01013589.1|.p2, gb|GESU01019423.1|.p1, gb|GESU01021283.1|.p1, gb|GESU01024742.1|.p1, gb|GESU01025361.1|.p1	PILA_00574, PILA_00582, PILA_00677, PILA_00705, PILA_04138, PILA_04664, PILA_06738, PILA_06949, PILA_06950, PILA_07340, PILA_07862, PILA_09384, PILA_09385, PILA_11919, PILA_12766, PILA_18761, PILA_20170, PILA_20893, PILA_20895, PILA_21099, PILA_22781, PILA_25233, PILA_28092, PILA_30875, PILA_32636, PILA_33843, gb|GEUZ01005859.1|.p1, gb|GEUZ01006686.1|.p1, gb|GEUZ01006823.1|.p1, gb|GEUZ01007673.1|…	GAQR01025931.1.p1, GAQR01038290.1.p1, GAQR01039551.1.p1, GAQR01045259.1.p1, GAQR01045260.1.p1, GAQR01045263.1.p1, GAQR01045629.1.p1, GFHB01045295.1.p1, GFHB01050704.1.p1, GFHB01072301.1.p1, GFHB01150913.1.p1	GBQX01029785.1.p1, GBQX01044914.1.p1, GDQD01000163.1.p1, GDQD01006486.1.p1, GDQD01010011.1.p1	GECO01000123.1.p1, GECO01010055.1.p1, GECO01021681.1.p1, GECO01024019.1.p1, GECO01024020.1.p1, GECO01029805.1.p1, GECO01035638.1.p1, GECO01038759.1.p1, GECO01039349.1.p1, GECO01050125.1.p1, GGAU01029421.1.p1, GGAU01037999.1.p1, GGAU01038010.1.p2, GGAU01039417.1.p1, GGAU01042334.1.p4, GGAU01047963.1.p1	GGJK01005191.1.p1, GGJK01006488.1.p1, GGJK01011235.1.p1, GGJK01014458.1.p1, GGJK01017597.1.p1, GGJK01022023.1.p1, GGJK01022919.1.p1, GGJK01025020.1.p1, GGJK01028375.1.p1, GGJK01029326.1.p1, GGJK01033128.1.p1, GGJK01042695.1.p1	1A_I11_VO_L_1_T_126311_226447_1 C_0.000_Length_2077 type=cds; aalen=523_75%_complete; clen=2077; strand=+; offs=100-1671; evgclass=main_okay_match_1A_I11_VO_L_1_T_126289_226447 C_0.000_Length_2264_pct_98_99;, 1A_I3_VO_L_1_T_32014_136734_1 C_0.000_Length_2106 type=cds; aalen=477_68%_complete; clen=2106; strand=+; offs=243-1676; evgclass=main_okay_match_1A_I3_VO_L_1_T_32018_136734 C_0.000_Length_21…	GFZL01005249.1.p1, GFZL01014348.1.p1, GFZL01016630.1.p1, GFZL01020162.1.p1, GFZL01020709.1.p1, GFZL01021000.1.p1, GFZL01021243.1.p1, GFZL01023582.1.p1, GFZL01023583.1.p1, GFZL01024108.1.p1, GFZL01025181.1.p1, GFZL01025764.1.p1, GFZL01027727.1.p1	GAZW02011736.1.p1, GAZW02021341.1.p1, GAZW02058545.1.p1, GAZW02058548.1.p1, GAZW02059252.1.p1, GAZW02061820.1.p1, GAZW02061821.1.p1, GAZW02061824.1.p1, GAZW02081741.1.p1, GAZW02081747.1.p1, GAZW02081751.1.p1, GAZW02081756.1.p1, GAZW02081808.1.p1, GAZW02081962.1.p1, GFFY01004215.1.p1, GFFY01015679.1.p1, GFFY01017398.1.p1, GFFY01018461.1.p1, GFFY01096768.1.p1, PSME_02419, PSME_05127, PSME_05673, PS…	Thoc_c16529_g1_i1.p1, Thoc_c16731_g1_i1.p1	SEGI_02652, SEGI_06377, SEGI_10366, SEGI_11165, SEGI_12306, SEGI_13118, SEGI_13158, SEGI_13838, SEGI_18308, SEGI_20077, SEGI_21339, SEGI_24177, SEGI_24358, SEGI_24825, SEGI_25428, SEGI_29522, SEGI_32017, SEGI_35204, SEGI_37788, SEGI_39667, SEGI_39860	SESE_017297, SESE_021525, SESE_025445, SESE_034188, SESE_039621, SESE_041290, SESE_041817, SESE_056940, SESE_057195, SESE_058403, SESE_061434, SESE_064078, SESE_066463, SESE_070773, SESE_072951, SESE_072994, SESE_073511, SESE_074805, SESE_076724, SESE_076745, SESE_077578, SESE_080743, SESE_080753, SESE_082084, SESE_084189, SESE_087675, SESE_087707, SESE_088509, SESE_089270, SESE_089817, SESE_0910…
OG0000059	GGJG01000455.1.p1, GGJG01001955.1.p1, GGJG01002535.1.p1, GGJG01007946.1.p1, GGJG01009689.1.p1, GGJG01020253.1.p1, GGJG01044095.1.p1	evm_27.model.AmTr_v1.0_scaffold00025.347 pacid=31566302 transcript=evm_27.model.AmTr_v1.0_scaffold00025.347 locus=evm_27.TU.AmTr_v1.0_scaffold00025.347 ID=evm_27.model.AmTr_v1.0_scaffold00025.347.v1.0 annot-version=v1.0, evm_27.model.AmTr_v1.0_scaffold00025.348 pacid=31566429 transcript=evm_27.model.AmTr_v1.0_scaffold00025.348 locus=evm_27.TU.AmTr_v1.0_scaffold00025.348 ID=evm_27.model.AmTr_v1.0_…	GBYR01013162.1.p1, GBYR01039202.1.p1, GBYR01042566.1.p1, GGBW01004029.1.p1, Gb_25340, Gb_29067, Gb_31625, Gb_31626, Gb_31628, Gb_40790	TnS000068141t01, TnS000499447t02, TnS000589577t01, TnS000829739t04, TnS000938369t01, TnS000959461t15, TnS000959461t16	Megl_c18088_g1_i1.p1, Megl_c26993_g1_i1.p1, Megl_c26993_g1_i1.p2, Megl_c26993_g1_i2.p1, Megl_c27484_g1_i1.p1, Megl_c27655_g1_i1.p1, Megl_c27655_g1_i10.p1, Megl_c27655_g1_i3.p1, Megl_c27655_g1_i7.p2, Megl_c42939_g1_i1.p1, Megl_c49437_g1_i1.p1, Megl_c51341_g1_i1.p1, Megl_c9213_g1_i1.p1	GCHX01353488.1.p1, GCZO01001857.1.p1, GCZO01107833.1.p1, GCZO01309731.1.p1, gb|GFBZ01020245.1|.p1, gb|GFBZ01020655.1|.p1, gi|830827595|gb|GCZO01348542.1|.p1, gi|830843490|gb|GCZO01332651.1|.p2, gi|830844573|gb|GCZO01331568.1|.p1, gi|830861590|gb|GCZO01314554.1|.p1, gi|830888701|gb|GCZO01291472.1|.p1, gi|830896266|gb|GCZO01283908.1|.p1, gi|830919589|gb|GCZO01260585.1|.p1, gi|830924196|gb|GCZO01255…	GGJJ01000464.1.p1, GGJJ01004635.1.p1, GGJJ01009846.1.p1, GGJJ01009866.1.p1, GGJJ01009867.1.p1, GGJJ01022322.1.p1, GGJJ01025637.1.p1, GGJJ01030348.1.p1, GGJJ01048455.1.p2	GDQR01005426.1.p1, GDQR01007361.1.p1, GDQR01009195.1.p1, GDQR01022589.1.p1, GFLL01051078.1.p1, GFLL01091892.1.p1, GFLL01092910.1.p1, GFLL01092916.1.p1, GFLL01102191.1.p1, GFLL01102199.1.p1, GFLL01127694.1.p1, GFLL01155004.1.p1	GGJH01009776.1.p1, GGJH01021802.1.p1, GGJH01026098.1.p1, GGJH01026285.1.p1, GGJH01029503.1.p1, GGJH01038072.1.p1, GGJH01043117.1.p1, GGJH01046493.1.p1	HAMI01005491.1.p1, HAMI01005974.1.p1, HAMI01007435.1.p1, HAMI01008093.1.p1, HAMI01009626.1.p1, HAMI01017344.1.p1, HAMI01023218.1.p1, HAMI01024164.1.p1, HAMI01032986.1.p1, HAMI01034745.1.p1	GBLJ01010154.1.p1, GBLJ01015665.1.p1, GBLJ01042285.1.p1, gb|GESU01033120.1|.p1	PILA_00747, PILA_02552, PILA_02853, PILA_02857, PILA_03111, PILA_04038, PILA_04039, PILA_07019, PILA_08215, PILA_09307, PILA_13500, PILA_14064, PILA_14341, PILA_15706, PILA_21612, PILA_23898, PILA_27584, PILA_33271, PILA_34145, PILA_35727, gb|GEUZ01006675.1|.p1, gb|GEUZ01007505.1|.p1, gb|GEUZ01007665.1|.p1, gb|GEUZ01007853.1|.p1, gb|GEUZ01008146.1|.p1, gb|GEUZ01009388.1|.p1, gb|GEUZ01012202.1|.p1…	GAQR01017150.1.p1, GAQR01022322.1.p1, GAQR01022325.1.p1, GAQR01028432.1.p1, GAQR01028434.1.p1, GAQR01043265.1.p1, GAQR01056134.1.p1, GFHB01004817.1.p1, GFHB01029936.1.p1, GFHB01091155.1.p1, GFHB01105004.1.p1, GFHB01121825.1.p1	GBQX01040446.1.p1, GBQX01044789.1.p1, GBQX01049507.1.p1, GDQD01001966.1.p1, GDQD01005008.1.p1, GDQD01005922.1.p1, GDQD01008493.1.p1	GECO01015843.1.p1, GECO01017136.1.p1, GECO01028844.1.p1, GECO01035241.1.p1, GECO01035348.1.p1, GECO01038431.1.p1, GECO01044505.1.p1, GECO01048351.1.p1, GGAU01043131.1.p1, GGAU01049608.1.p2	GGJK01008784.1.p1, GGJK01008785.1.p1, GGJK01012560.1.p1, GGJK01015370.1.p1, GGJK01017915.1.p1, GGJK01019608.1.p1, GGJK01020332.1.p1, GGJK01021410.1.p1, GGJK01021428.1.p1, GGJK01026030.1.p1, GGJK01033311.1.p1, GGJK01035653.1.p1, GGJK01040142.1.p1, GGJK01045003.1.p1	1A_I11_NT_comp45891_c0_seq1_1 type=cds; aalen=504_88%_complete; clen=1703; strand=+; offs=118-1632; evgclass=main_okay_match_1A_I11_NT_comp45891_c0_seq5_pct_99_100;, 1A_I3_VO_L_696_T_149_235_1 C_0.041_Length_1185 type=cds; aalen=359_91%_complete; clen=1185; strand=+; offs=51-1130; evgclass=maina2_okay_match_1A_I3_VO_L_696_T_151_235 C_0.043_Length_1185_pct_99_98;, 1A_I5_VO_L_1_T_46156_64687_1 C_0.…	GFZL01003261.1.p1, GFZL01011823.1.p1, GFZL01011824.1.p1, GFZL01014104.1.p1, GFZL01021862.1.p1, GFZL01022295.1.p1, GFZL01023503.1.p1, GFZL01025063.1.p1	GAZW02009132.1.p1, GAZW02024587.1.p1, GAZW02027254.1.p1, GAZW02027255.1.p1, GAZW02054273.1.p1, GAZW02054274.1.p1, GAZW02061146.1.p1, GAZW02061151.1.p1, GAZW02075941.1.p1, GAZW02075947.1.p1, GAZW02075948.1.p1, GFFY01011860.1.p1, GFFY01019958.1.p1, GFFY01020369.1.p1, GFFY01076960.1.p1, PSME_01412, PSME_06390, PSME_06391, PSME_07967, PSME_10671, PSME_13962, PSME_16231, PSME_17217, PSME_19851, PSME_2…	Thoc_c27515_g1_i1.p1, Thoc_c27515_g2_i1.p1, Thoc_c28496_g1_i2.p1, Thoc_c60988_g1_i1.p1, Thoc_c7902_g1_i1.p1	SEGI_01214, SEGI_01374, SEGI_03346, SEGI_03440, SEGI_04310, SEGI_05368, SEGI_07424, SEGI_08158, SEGI_08603, SEGI_10657, SEGI_11428, SEGI_11661, SEGI_15554, SEGI_15976, SEGI_22017, SEGI_22135, SEGI_24007, SEGI_26190, SEGI_27961, SEGI_28280, SEGI_28393, SEGI_28521, SEGI_29157, SEGI_29167, SEGI_29181, SEGI_31872, SEGI_31934, SEGI_33543, SEGI_34908, SEGI_35951, SEGI_36042, SEGI_40525	SESE_003044, SESE_018019, SESE_030222, SESE_043072, SESE_056398, SESE_057069, SESE_057435, SESE_058048, SESE_061315, SESE_062104, SESE_062651, SESE_062664, SESE_064103, SESE_064689, SESE_065546, SESE_065949, SESE_067571, SESE_070193, SESE_070394, SESE_070620, SESE_070765, SESE_071024, SESE_072252, SESE_073876, SESE_077341, SESE_077351, SESE_077750, SESE_080916, SESE_081480, SESE_081588, SESE_0836…
OG0000060	GGJG01010572.1.p1, GGJG01014248.1.p1, GGJG01015142.1.p1, GGJG01015485.1.p1, GGJG01022719.1.p1, GGJG01031079.1.p1, GGJG01031422.1.p1, GGJG01033237.1.p1, GGJG01035016.1.p1, GGJG01038771.1.p1, GGJG01042614.1.p1, GGJG01044771.1.p1	evm_27.model.AmTr_v1.0_scaffold00009.298 pacid=31568575 transcript=evm_27.model.AmTr_v1.0_scaffold00009.298 locus=evm_27.TU.AmTr_v1.0_scaffold00009.298 ID=evm_27.model.AmTr_v1.0_scaffold00009.298.v1.0 annot-version=v1.0, evm_27.model.AmTr_v1.0_scaffold00024.221 pacid=31558526 transcript=evm_27.model.AmTr_v1.0_scaffold00024.221 locus=evm_27.TU.AmTr_v1.0_scaffold00024.221 ID=evm_27.model.AmTr_v1.0_…	GBYR01044202.1.p1, GGBW01046635.1.p1, GGBW01051505.1.p1, GHLL01124066.1.p1, GHLL01174897.1.p1, Gb_02422, Gb_07139, Gb_21264, Gb_22885, Gb_29933	TnS000173151t07, TnS000613069t01, TnS000669913t02, TnS000709951t06	Megl_c18491_g1_i3.p1, Megl_c19106_g1_i1.p1, Megl_c22043_g1_i2.p1, Megl_c22043_g1_i3.p1, Megl_c24281_g1_i2.p1, Megl_c26228_g2_i2.p1, Megl_c8850_g1_i1.p1	GCHX01047550.1.p1, GCHX01246287.1.p1, GCHX01254530.1.p1, GCHX01351340.1.p1, GCHX01448666.1.p1, GCZO01008220.1.p1, GCZO01106302.1.p1, GCZO01209462.1.p1, GCZO01308413.1.p1, gb|GFBZ01015123.1|.p1, gb|GFBZ01018032.1|.p1, gi|830824075|gb|GCZO01352061.1|.p1, gi|830828943|gb|GCZO01347194.1|.p1, gi|830842322|gb|GCZO01333818.1|.p1, gi|830845293|gb|GCZO01330848.1|.p1, gi|830911345|gb|GCZO01268829.1|.p1, gi…	GGJJ01008371.1.p1, GGJJ01014532.1.p1, GGJJ01015427.1.p1, GGJJ01015783.1.p1, GGJJ01022080.1.p1, GGJJ01024067.1.p1, GGJJ01025364.1.p1, GGJJ01040782.1.p1, GGJJ01044636.1.p1, GGJJ01045097.1.p1, GGJJ01046310.1.p1, GGJJ01052603.1.p1, GGJJ01054034.1.p1	GDQR01014657.1.p1, GDQR01015161.1.p1, GFLL01062497.1.p1, GFLL01063778.1.p1, GFLL01069505.1.p1, GFLL01078249.1.p1, GFLL01078250.1.p1, GFLL01099731.1.p1, GFLL01099737.1.p1, GFLL01105269.1.p1, GFLL01111974.1.p1, GFLL01111976.1.p1, GFLL01163655.1.p1, GFLL01179725.1.p1, GFLL01179773.1.p1, gb|GFBO01043651.1|.p1, gb|GFBO01057035.1|.p1, gb|GFBO01057038.1|.p1, gb|GFBO01072015.1|.p1	GGJH01011203.1.p1, GGJH01012029.1.p1, GGJH01013273.1.p1, GGJH01013307.1.p1, GGJH01013428.1.p1, GGJH01013940.1.p1, GGJH01025876.1.p1, GGJH01032757.1.p1, GGJH01033406.1.p1, GGJH01046979.1.p1	HAMI01004225.1.p1, HAMI01004411.1.p1, HAMI01007271.1.p1, HAMI01011507.1.p1, HAMI01013086.1.p1, HAMI01017147.1.p1, HAMI01022817.1.p1, HAMI01038245.1.p1, HAMI01040430.1.p1	GBLJ01006914.1.p1, GBLJ01014907.1.p1, GBLJ01016909.1.p1, GBLJ01017267.1.p1, GBLJ01026812.1.p1, GBLJ01027256.1.p1, GBLJ01027945.1.p1, GBLJ01028652.1.p1, GBLJ01033765.1.p1, GBLJ01036641.1.p1, GBLJ01038558.1.p1, GBLJ01046786.1.p1, gb|GESU01012383.1|.p2, gb|GESU01014697.1|.p1, gb|GESU01032416.1|.p1, gb|GESU01035918.1|.p1	PILA_01799, PILA_02819, PILA_03506, PILA_03694, PILA_04949, PILA_05661, PILA_05916, PILA_06997, PILA_08987, PILA_12557, PILA_12913, PILA_13307, PILA_13768, PILA_14741, PILA_15077, PILA_16002, PILA_16986, PILA_17113, PILA_17622, PILA_19077, PILA_19112, PILA_19113, PILA_20006, PILA_22474, PILA_22992, PILA_27382, PILA_27631, PILA_28077, PILA_28078, PILA_28838, PILA_29642, PILA_32691, PILA_33448, PIL…	GAQR01002796.1.p1, GAQR01007693.1.p1, GAQR01014792.1.p1, GAQR01024764.1.p1, GAQR01046875.1.p1, GAQR01046876.1.p1, GAQR01047172.1.p1, GAQR01049620.1.p1, GAQR01053575.1.p1, GFHB01008743.1.p1, GFHB01012236.1.p1, GFHB01037884.1.p1, GFHB01093128.1.p1, GFHB01100648.1.p1, GFHB01111482.1.p1, GFHB01114302.1.p1, GFHB01155663.1.p1, GFHB01177522.1.p1	GBQX01027582.1.p1, GBQX01031991.1.p1, GBQX01033140.1.p1, GBQX01037058.1.p1, GBQX01039584.1.p1, GDQD01010454.1.p1	GECO01015352.1.p1, GECO01027982.1.p1, GECO01033880.1.p1, GECO01040210.1.p1, GECO01041343.1.p1, GECO01043129.1.p1, GECO01043759.1.p1, GECO01047658.1.p1, GECO01049292.1.p1, GECO01049327.1.p1, GECO01051474.1.p1, GGAU01004036.1.p1, GGAU01015504.1.p2, GGAU01020153.1.p2, GGAU01020361.1.p2, GGAU01023303.1.p2, GGAU01023846.1.p2, GGAU01039350.1.p2, GGAU01039552.1.p1, GGAU01040597.1.p1, GGAU01042879.1.p1, …	GGJK01010030.1.p1, GGJK01010760.1.p1, GGJK01010920.1.p1, GGJK01011909.1.p1, GGJK01012462.1.p1, GGJK01020018.1.p1, GGJK01024319.1.p1, GGJK01026595.1.p1, GGJK01027810.1.p1, GGJK01030729.1.p1, GGJK01031164.1.p1, GGJK01031967.1.p1, GGJK01034422.1.p1, GGJK01039835.1.p1	1A_I11_VO_L_2964_T_11_34_1 C_0.037_Length_866 type=cds; aalen=192_66%_complete; clen=866; strand=-; offs=866-288; evgclass=noclass_okay_match_6A_I22_VO_L_57797_T_2_2 C_0.333_Length_208_pct_99_100;, 1A_I5_NT_comp33882_c0_seq2_1 type=cds; aalen=205_67%_complete; clen=919; strand=+; offs=23-640; evgclass=main_okay_match_1A_I5_VO_L_8557_T_19_22 C_0.258_Length_905_pct_99_100;, 1A_all_NT_comp105339_c0_…	GFZL01001173.1.p1, GFZL01002298.1.p1, GFZL01007747.1.p1, GFZL01007844.1.p1, GFZL01008020.1.p1, GFZL01008552.1.p1, GFZL01014489.1.p1, GFZL01016813.1.p1, GFZL01021840.1.p1, GFZL01022230.1.p1, GFZL01022264.1.p1, GFZL01022630.1.p1, GFZL01023636.1.p1, GFZL01026418.1.p1, GFZL01027221.1.p1	GAZW02012099.1.p1, GAZW02021587.1.p1, GAZW02026333.1.p1, GAZW02029207.1.p1, GAZW02069189.1.p1, GAZW02069193.1.p1, GAZW02069195.1.p1, GAZW02069197.1.p1, GAZW02095429.1.p1, GAZW02104150.1.p1, GFFY01024676.1.p1, GFFY01028636.1.p1, GFFY01054688.1.p1, GFFY01059088.1.p1, GFFY01061515.1.p1, GFFY01065031.1.p1, GFFY01087532.1.p1, GFFY01095875.1.p1, GFFY01112950.1.p1, PSME_01810, PSME_07851, PSME_07852, PS…	Thoc_c18092_g1_i3.p1, Thoc_c24501_g3_i1.p1, Thoc_c26816_g1_i1.p1, Thoc_c40978_g1_i1.p1, Thoc_c6732_g1_i1.p1	SEGI_00863, SEGI_02262, SEGI_09780, SEGI_13211, SEGI_14545, SEGI_20312, SEGI_27641, SEGI_29011, SEGI_32894	SESE_057238, SESE_066024, SESE_067970, SESE_071984, SESE_076247, SESE_086513, SESE_092158, SESE_092773, SESE_095336, SESE_098893, SESE_105068, SESE_110140, SESE_118112, SESE_119217, SESE_121577
OG0000061	GGJG01001423.1.p1, GGJG01011825.1.p1, GGJG01012457.1.p2, GGJG01018093.1.p1, GGJG01018094.1.p1, GGJG01019475.1.p1, GGJG01027618.1.p1, GGJG01031802.1.p1, GGJG01037195.1.p1, GGJG01044579.1.p1		GBYR01030827.1.p1, GBYR01033821.1.p1, GBYR01033822.1.p1, GGBW01005803.1.p1, GGBW01006389.1.p1, GGBW01010611.1.p1, GGBW01010614.1.p2, GGBW01010932.1.p1, GGBW01010944.1.p1, GGBW01030229.1.p1, GGBW01039600.1.p1, GGBW01048307.1.p1, GGBW01051052.1.p1, GHLL01081817.1.p1, GHLL01227945.1.p1, GHLL01254994.1.p1, GHLL01254996.1.p1, GHLL01255006.1.p1, GHLL01255447.1.p1, Gb_10875, Gb_20961, Gb_28788, Gb_41607	TnS000125481t03	Megl_c27926_g1_i2.p1, Megl_c27926_g2_i1.p1, Megl_c33132_g1_i1.p1	GCHX01148006.1.p1, GCHX01151628.1.p1, GCHX01254171.1.p1, gb|GFBZ01017976.1|.p1, gi|830883228|gb|GCZO01296944.1|.p1, gi|830949474|gb|GCZO01230701.1|.p1, gi|831030796|gb|GCZO01149649.1|.p1, gi|831031753|gb|GCZO01148692.1|.p1, gi|831116364|gb|GCZO01064097.1|.p1, gi|831116380|gb|GCZO01064081.1|.p1	GGJJ01012699.1.p1, GGJJ01020897.1.p1, GGJJ01022308.1.p1, GGJJ01028925.1.p1, GGJJ01030207.1.p1, GGJJ01030315.1.p1, GGJJ01040235.1.p1, GGJJ01044768.1.p1, GGJJ01044832.1.p1	GDQR01006368.1.p1, GDQR01008575.1.p1, GDQR01015179.1.p1, GDQR01020018.1.p1, GFLL01028433.1.p1, GFLL01058829.1.p1, GFLL01078947.1.p1, GFLL01078951.1.p1, GFLL01114359.1.p1, GFLL01117890.1.p1, GFLL01117893.1.p2, GFLL01117896.1.p3, GFLL01128080.1.p2, GFLL01128081.1.p1, gb|GFBO01043364.1|.p1, gb|GFBO01043365.1|.p1, gb|GFBO01068526.1|.p1, gb|GFBO01081146.1|.p1	GGJH01008612.1.p1, GGJH01013290.1.p1, GGJH01028509.1.p1	HAMI01004382.1.p1, HAMI01008875.1.p1, HAMI01016194.1.p1, HAMI01026062.1.p1, HAMI01028681.1.p1, HAMI01035164.1.p1, HAMI01039662.1.p1	GBLJ01009913.1.p1, GBLJ01011660.1.p1, GBLJ01027836.1.p1, GBLJ01044991.1.p1, gb|GESU01004252.1|.p1, gb|GESU01022917.1|.p1, gb|GESU01028181.1|.p1	PILA_01456, PILA_01457, PILA_01470, PILA_03908, PILA_06333, PILA_07278, PILA_08386, PILA_08736, PILA_09726, PILA_11517, PILA_12330, PILA_13176, PILA_13461, PILA_15081, PILA_17751, PILA_18486, PILA_19152, PILA_20311, PILA_20935, PILA_21436, PILA_24467, PILA_26212, PILA_27842, PILA_28878, PILA_29571, PILA_30247, PILA_30992, PILA_32241, PILA_34911, PILA_34960, PILA_36081, PILA_37873, gb|GEUZ01003199…	GAQR01005968.1.p2, GAQR01012611.1.p1, GAQR01021481.1.p1, GAQR01023718.1.p1, GAQR01040417.1.p1, GAQR01040542.1.p1, GAQR01040545.1.p1, GAQR01056681.1.p1, GFHB01054149.1.p1, GFHB01059794.1.p1, GFHB01100739.1.p1, GFHB01124624.1.p1, GFHB01141463.1.p1, GFHB01176543.1.p1	GBQX01034060.1.p1, GBQX01038874.1.p1	GECO01004710.1.p1, GECO01004946.1.p1, GECO01013756.1.p1, GECO01015082.1.p1, GECO01015842.1.p1, GECO01018445.1.p1, GECO01018895.1.p1, GECO01020122.1.p1, GECO01024234.1.p1, GECO01026364.1.p1, GECO01026687.1.p1, GECO01028453.1.p1, GECO01031899.1.p1, GECO01035177.1.p1, GECO01037986.1.p1, GECO01042604.1.p1, GECO01043393.1.p1, GECO01049172.1.p1, GECO01052022.1.p1, GGAU01019663.1.p2, GGAU01020606.1.p2, …	GGJK01007740.1.p1, GGJK01011894.1.p1, GGJK01012180.1.p1, GGJK01012579.1.p1, GGJK01020839.1.p1, GGJK01021348.1.p1, GGJK01022133.1.p1, GGJK01029898.1.p1, GGJK01032146.1.p1, GGJK01033976.1.p1, GGJK01035223.1.p1, GGJK01044201.1.p1	1A_I3_VO_L_3465_T_76_90_1 C_0.167_Length_1200 type=cds; aalen=385_96%_complete; clen=1200; strand=-; offs=1194-37; evgclass=main_okay_match_1A_I3_VO_L_3465_T_77_90 C_0.135_Length_967_pct_100_98;, 1A_I9_VO_L_1_T_43727_116761_1 C_0.000_Length_2146 type=cds; aalen=354_49%_complete-utrpoor; clen=2146; strand=-; offs=1102-38; evgclass=noclass_okay_match_5A_I15_NT_comp28173_c0_seq3_pct_98_90;, 2A_I10_V…	GFZL01000527.1.p1, GFZL01006614.1.p1, GFZL01016737.1.p1, GFZL01020495.1.p1, GFZL01020728.1.p1, GFZL01020962.1.p1, GFZL01022788.1.p1, GFZL01023203.1.p1, GFZL01023533.1.p1, GFZL01025134.1.p1, GFZL01025731.1.p1, GFZL01026385.1.p1, GFZL01027550.1.p1, GFZL01027798.1.p1	GAZW02039029.1.p1, GAZW02039030.1.p1, GAZW02039031.1.p1, GAZW02039032.1.p1, GAZW02098616.1.p1, GAZW02098617.1.p1, GAZW02098627.1.p1, GFFY01003421.1.p1, GFFY01004465.1.p1, GFFY01006453.1.p1, GFFY01008128.1.p2, GFFY01009937.1.p1, GFFY01017919.1.p1, GFFY01019043.1.p3, GFFY01028602.1.p1, GFFY01064944.1.p1, PSME_04868, PSME_05961, PSME_05962, PSME_16843, PSME_17360, PSME_18291, PSME_19854, PSME_20338,…	Thoc_c26265_g1_i1.p1, Thoc_c26265_g1_i2.p1, Thoc_c28415_g1_i3.p1, Thoc_c43349_g1_i1.p1	SEGI_00898, SEGI_05512, SEGI_09119, SEGI_11892, SEGI_14740, SEGI_20095, SEGI_20401, SEGI_22542, SEGI_23226, SEGI_24566, SEGI_26342, SEGI_29197, SEGI_33086, SEGI_33489, SEGI_34378, SEGI_34438, SEGI_35445, SEGI_38448, SEGI_39895	SESE_005720, SESE_018919, SESE_021150, SESE_024739, SESE_028520, SESE_029038, SESE_030687, SESE_030763, SESE_031017, SESE_031740, SESE_034128, SESE_035268, SESE_035497, SESE_042932, SESE_056428, SESE_060498, SESE_066449, SESE_066643, SESE_070154, SESE_070441, SESE_070601, SESE_072043, SESE_073091, SESE_073354, SESE_073373, SESE_076259, SESE_076509, SESE_077024, SESE_077380, SESE_081553, SESE_0828…
OG0000062	GGJG01000390.1.p1, GGJG01002507.1.p1, GGJG01002898.1.p1, GGJG01017303.1.p1, GGJG01018606.1.p1, GGJG01020394.1.p1, GGJG01041608.1.p1, GGJG01042662.1.p2	evm_27.model.AmTr_v1.0_scaffold00013.262 pacid=31550737 transcript=evm_27.model.AmTr_v1.0_scaffold00013.262 locus=evm_27.TU.AmTr_v1.0_scaffold00013.262 ID=evm_27.model.AmTr_v1.0_scaffold00013.262.v1.0 annot-version=v1.0, evm_27.model.AmTr_v1.0_scaffold00033.204 pacid=31561810 transcript=evm_27.model.AmTr_v1.0_scaffold00033.204 locus=evm_27.TU.AmTr_v1.0_scaffold00033.204 ID=evm_27.model.AmTr_v1.0_…	GBYR01003839.1.p1, GBYR01009439.1.p1, GBYR01021260.1.p1, GBYR01033455.1.p1, GBYR01033993.1.p1, GBYR01034160.1.p1, GBYR01035358.1.p1, GBYR01043538.1.p1, GBYR01046214.1.p1, GGBW01009369.1.p1, GGBW01046982.1.p1, GGBW01049677.1.p1, GHLL01135909.1.p1, GHLL01232031.1.p1, Gb_07039, Gb_15187, Gb_18920, Gb_21980, Gb_25834, Gb_25835, Gb_35182, Gb_38450	TnS000134953t01, TnS000266723t02, TnS000266723t04, TnS000379253t03, TnS000526259t01, TnS000526259t02, TnS000538847t02, TnS000538847t04, TnS000975685t01	Megl_c13610_g3_i1.p1, Megl_c14400_g1_i1.p1, Megl_c18189_g1_i2.p1, Megl_c19936_g1_i2.p1, Megl_c19936_g2_i1.p1, Megl_c19972_g1_i1.p1, Megl_c20447_g1_i1.p1, Megl_c20447_g2_i1.p1, Megl_c23539_g1_i1.p1, Megl_c23539_g3_i1.p1, Megl_c23685_g1_i1.p1, Megl_c27201_g1_i2.p1, Megl_c27201_g3_i1.p1, Megl_c27794_g1_i2.p1	GCHX01145634.1.p1, GCHX01348520.1.p1, GCHX01449935.1.p1, gb|GFBZ01009042.1|.p1, gb|GFBZ01016472.1|.p1, gi|830824509|gb|GCZO01351627.1|.p1, gi|830999279|gb|GCZO01181094.1|.p1, gi|831056794|gb|GCZO01123653.1|.p1, gi|831099752|gb|GCZO01080707.1|.p1	GGJJ01000403.1.p1, GGJJ01010208.1.p1, GGJJ01014686.1.p1, GGJJ01023986.1.p1, GGJJ01025511.1.p1, GGJJ01030427.1.p1, GGJJ01037486.1.p1, GGJJ01039646.1.p1, GGJJ01047749.1.p1	GDQR01002186.1.p1, GDQR01008013.1.p1, GDQR01017476.1.p1, GFLL01047657.1.p1, GFLL01056562.1.p1, GFLL01095422.1.p1, GFLL01095423.1.p1, GFLL01098174.1.p1, GFLL01100050.1.p1, GFLL01101116.1.p1, GFLL01133423.1.p1, gb|GFBO01083209.1|.p1	GGJH01004024.1.p1, GGJH01004025.1.p1, GGJH01006946.1.p1, GGJH01007432.1.p1, GGJH01007653.1.p1, GGJH01011109.1.p1, GGJH01011111.1.p1, GGJH01034013.1.p1, GGJH01038373.1.p1, GGJH01043883.1.p1	HAMI01000808.1.p1, HAMI01003178.1.p1, HAMI01003750.1.p1, HAMI01010624.1.p1, HAMI01013346.1.p1, HAMI01017702.1.p1, HAMI01019425.1.p1, HAMI01027117.1.p1, HAMI01028580.1.p1, HAMI01029018.1.p1, HAMI01040102.1.p1	GBLJ01003709.1.p1, GBLJ01010723.1.p1, GBLJ01036256.1.p1, gb|GESU01002937.1|.p1, gb|GESU01013304.1|.p1, gb|GESU01018832.1|.p1, gb|GESU01029026.1|.p1	PILA_14317, PILA_14318, PILA_15562, PILA_24510, PILA_29678, PILA_37253, gb|GEUZ01007726.1|.p1, gb|GEUZ01007889.1|.p1, gb|GEUZ01007995.1|.p1, gb|GEUZ01008122.1|.p1, gb|GEUZ01009453.1|.p1, gb|GEUZ01012463.1|.p1, gb|GEUZ01017004.1|.p1, gb|GEUZ01025494.1|.p1	GAQR01022274.1.p2, GAQR01028535.1.p1, GAQR01046143.1.p1, GAQR01046161.1.p1, GAQR01046172.1.p1, GAQR01046175.1.p1, GAQR01046582.1.p1, GAQR01046584.1.p1, GFHB01052591.1.p1, GFHB01095615.1.p1, GFHB01136771.1.p1	GBQX01033119.1.p1, GBQX01041338.1.p1, GBQX01046712.1.p1, GBQX01047016.1.p1, GBQX01047591.1.p1, GDQD01000236.1.p1, GDQD01000443.1.p1, GDQD01002869.1.p1, GDQD01008174.1.p1, GDQD01009722.1.p1	GECO01005408.1.p1, GECO01009381.1.p1, GECO01009941.1.p1, GECO01013979.1.p1, GECO01019008.1.p1, GECO01027207.1.p1, GECO01028064.1.p1, GECO01031889.1.p1, GECO01033446.1.p1, GECO01034102.1.p1, GECO01038259.1.p1, GECO01046493.1.p1, GECO01049153.1.p1, GGAU01019344.1.p1, GGAU01020259.1.p4, GGAU01037954.1.p4, GGAU01039474.1.p1, GGAU01043168.1.p1, GGAU01045567.1.p2	GGJK01003638.1.p1, GGJK01005289.1.p1, GGJK01005290.1.p1, GGJK01006246.1.p1, GGJK01006682.1.p1, GGJK01008549.1.p1, GGJK01013985.1.p1, GGJK01018204.1.p1, GGJK01029813.1.p1, GGJK01039022.1.p1	1A_I11_VO_L_2509_T_179_289_1 C_0.042_Length_1470 type=cds; aalen=390_79%_complete; clen=1470; strand=+; offs=109-1281; evgclass=main_okay_match_1A_I11_VO_L_2509_T_164_289 C_0.055_Length_1856_pct_99_75;, 1A_I3_VO_L_1_T_45180_136734_1 C_0.000_Length_1871 type=cds; aalen=475_76%_complete; clen=1871; strand=+; offs=150-1577; evgclass=main_okay_match_1A_I3_VO_L_1_T_45175_136734 C_0.000_Length_1588_pct…	GFZL01000599.1.p1, GFZL01006198.1.p1, GFZL01011557.1.p1, GFZL01011655.1.p1, GFZL01012187.1.p1, GFZL01012255.1.p1, GFZL01014324.1.p1, GFZL01015158.1.p1, GFZL01015338.1.p1, GFZL01019875.1.p1, GFZL01019957.1.p1, GFZL01020395.1.p1, GFZL01027103.1.p1, GFZL01027892.1.p1	GAZW02028196.1.p1, GAZW02028198.1.p1, GAZW02066165.1.p1, GAZW02068360.1.p1, GAZW02077829.1.p1, GAZW02085080.1.p1, GFFY01013684.1.p1, GFFY01014055.1.p1, GFFY01014594.1.p1, GFFY01029554.1.p1, GFFY01030720.1.p1, GFFY01037779.1.p1, GFFY01041546.1.p1, PSME_00091, PSME_08793, PSME_09526, PSME_09770, PSME_09789, PSME_21742, PSME_23555, PSME_24763, PSME_29382, PSME_30048	Thoc_c23822_g1_i1.p1, Thoc_c26301_g1_i1.p1, Thoc_c27018_g1_i1.p1, Thoc_c28268_g1_i1.p1, Thoc_c28782_g1_i1.p1, Thoc_c41663_g1_i1.p1, Thoc_c47117_g1_i1.p1	SEGI_02357, SEGI_03457, SEGI_05427, SEGI_08272, SEGI_08286, SEGI_09695, SEGI_10591, SEGI_13579, SEGI_13702, SEGI_14207, SEGI_15685, SEGI_16746, SEGI_17369, SEGI_18179, SEGI_20654, SEGI_21085, SEGI_22484, SEGI_22863, SEGI_23781, SEGI_26794, SEGI_27381, SEGI_27823, SEGI_28693, SEGI_30792, SEGI_31682, SEGI_32541, SEGI_32928, SEGI_33164, SEGI_33575, SEGI_34930, SEGI_36946, SEGI_37944, SEGI_38173, SEG…	SESE_001406, SESE_007386, SESE_007893, SESE_016436, SESE_018138, SESE_028354, SESE_029177, SESE_031308, SESE_031323, SESE_034248, SESE_037145, SESE_037422, SESE_037991, SESE_038375, SESE_040833, SESE_041440, SESE_043656, SESE_044272, SESE_044797, SESE_046425, SESE_051868, SESE_052796, SESE_054315, SESE_054792, SESE_054914, SESE_055479, SESE_056970, SESE_063053, SESE_063787, SESE_065311, SESE_0691…
OG0000063	GGJG01000775.1.p1, GGJG01000948.1.p1, GGJG01001726.1.p1, GGJG01007879.1.p1, GGJG01008257.1.p1, GGJG01009228.1.p1, GGJG01020246.1.p1, GGJG01022525.1.p1, GGJG01028340.1.p1, GGJG01028668.1.p1, GGJG01032574.1.p1, GGJG01042410.1.p1, GGJG01042465.1.p1, GGJG01043662.1.p1	evm_27.model.AmTr_v1.0_scaffold00002.377 pacid=31562307 transcript=evm_27.model.AmTr_v1.0_scaffold00002.377 locus=evm_27.TU.AmTr_v1.0_scaffold00002.377 ID=evm_27.model.AmTr_v1.0_scaffold00002.377.v1.0 annot-version=v1.0, evm_27.model.AmTr_v1.0_scaffold00003.165 pacid=31565591 transcript=evm_27.model.AmTr_v1.0_scaffold00003.165 locus=evm_27.TU.AmTr_v1.0_scaffold00003.165 ID=evm_27.model.AmTr_v1.0_…	GBYR01002360.1.p1, GBYR01030483.1.p1, GBYR01035402.1.p1, GBYR01044294.1.p1, GGBW01018208.1.p1, GGBW01018219.1.p1, GGBW01018220.1.p1, GHLL01064686.1.p1, GHLL01100391.1.p1, GHLL01106975.1.p1, GHLL01127761.1.p1, GHLL01138909.1.p1, GHLL01150333.1.p1, GHLL01153969.1.p1, GHLL01215429.1.p1, GHLL01222924.1.p1, GHLL01440336.1.p1, GHLL01654109.1.p1, GHLL01657437.1.p1, Gb_07560, Gb_16803, Gb_30884	TnS000118905t01, TnS000138039t01, TnS000893675t03, TnS000918259t05	Megl_c16790_g1_i2.p1, Megl_c19919_g1_i1.p1, Megl_c19919_g1_i4.p1, Megl_c19919_g2_i1.p1, Megl_c23048_g1_i3.p1, Megl_c25129_g1_i1.p2	GCHX01049741.1.p1, GCHX01052402.1.p1, gb|GFBZ01007919.1|.p1, gb|GFBZ01024870.1|.p1, gi|830995754|gb|GCZO01184427.1|.p1, gi|831042878|gb|GCZO01137568.1|.p1, gi|831049142|gb|GCZO01131305.1|.p1	GGJJ01001007.1.p1, GGJJ01001751.1.p1, GGJJ01002271.1.p1, GGJJ01008421.1.p1, GGJJ01012775.1.p1, GGJJ01013569.1.p1, GGJJ01015355.1.p1, GGJJ01025002.1.p1, GGJJ01051821.1.p1	GDQR01001212.1.p1, GDQR01001859.1.p1, GDQR01023108.1.p1, GFLL01106275.1.p1	GGJH01010138.1.p1, GGJH01011235.1.p1, GGJH01011670.1.p1, GGJH01011934.1.p1, GGJH01012390.1.p1, GGJH01012736.1.p1, GGJH01012821.1.p1, GGJH01013435.1.p1, GGJH01014234.1.p1, GGJH01024770.1.p1, GGJH01025776.1.p1, GGJH01030968.1.p1, GGJH01036243.1.p1, GGJH01036692.1.p1, GGJH01039262.1.p1, GGJH01046962.1.p1	HAMI01000610.1.p1, HAMI01001775.1.p1, HAMI01007029.1.p1, HAMI01012193.1.p1, HAMI01020275.1.p1, HAMI01024026.1.p1, HAMI01034384.1.p1, HAMI01034600.1.p1, HAMI01038644.1.p1	GBLJ01001249.1.p1, GBLJ01039162.1.p1, gb|GESU01003698.1|.p1, gb|GESU01012591.1|.p1, gb|GESU01012657.1|.p1, gb|GESU01022463.1|.p2	PILA_01599, PILA_03133, PILA_03737, PILA_04342, PILA_05839, PILA_06780, PILA_08238, PILA_13524, PILA_18371, PILA_19490, PILA_20730, PILA_23964, PILA_24280, PILA_27144, PILA_27274, PILA_31104, PILA_33830, gb|GEUZ01014504.1|.p1, gb|GEUZ01017710.1|.p1, gb|GEUZ01018326.1|.p1, gb|GEUZ01018367.1|.p1, gb|GEUZ01018515.1|.p1, gb|GEUZ01018997.1|.p1, gb|GEUZ01020470.1|.p1, gb|GEUZ01020689.1|.p1, gb|GEUZ0102…	GAQR01022311.1.p1, GAQR01024708.1.p1, GAQR01038356.1.p1, GAQR01042033.1.p1, GAQR01042516.1.p1, GAQR01059399.1.p1, GFHB01058248.1.p2, GFHB01116541.1.p1, GFHB01140549.1.p1	GBQX01022860.1.p1, GBQX01027502.1.p1, GBQX01032691.1.p1, GBQX01035984.1.p1, GDQD01001961.1.p1	GECO01013996.1.p1, GECO01015186.1.p1, GECO01016418.1.p1, GECO01020362.1.p1, GECO01025075.1.p1, GECO01025190.1.p1, GECO01025192.1.p1, GECO01032588.1.p1, GECO01034049.1.p1, GECO01041150.1.p1, GECO01041151.1.p1, GECO01048834.1.p1, GECO01051435.1.p1, GGAU01005450.1.p2, GGAU01007282.1.p2, GGAU01007362.1.p4, GGAU01007758.1.p2, GGAU01017275.1.p2, GGAU01020262.1.p4, GGAU01020287.1.p3, GGAU01022565.1.p3, …	GGJK01001569.1.p1, GGJK01010060.1.p1, GGJK01010677.1.p1, GGJK01011088.1.p1, GGJK01018495.1.p1, GGJK01019411.1.p1, GGJK01019728.1.p1, GGJK01020224.1.p1, GGJK01020477.1.p1, GGJK01025433.1.p1, GGJK01025745.1.p1, GGJK01029477.1.p1, GGJK01035226.1.p1, GGJK01040916.1.p1	1A_I11_VO_L_1612_T_71_91_1 C_0.102_Length_1096 type=cds; aalen=297_81%_complete; clen=1096; strand=-; offs=1057-164; evgclass=main_okay_match_6A_I20_VO_L_1_T_29746_133533 C_0.000_Length_1075_pct_98_100;, 1A_I11_VO_L_1613_T_72_86_1 C_0.093_Length_1152 type=cds; aalen=296_77%_complete; clen=1152; strand=-; offs=1098-208; evgclass=main_okay_match_1A_I11_VO_L_1613_T_85_86 C_0.096_Length_1172_pct_100_…	GFZL01001790.1.p1, GFZL01002911.1.p1, GFZL01006636.1.p1, GFZL01010869.1.p1, GFZL01010873.1.p1, GFZL01014660.1.p1, GFZL01019314.1.p1, GFZL01019419.1.p1, GFZL01019579.1.p1, GFZL01020112.1.p1, GFZL01023897.1.p1, GFZL01025423.1.p1, GFZL01026316.1.p1	GAZW02035596.1.p1, GAZW02035598.1.p1, GAZW02036898.1.p1, GAZW02066078.1.p1, GAZW02078316.1.p1, GAZW02078317.1.p1, GFFY01022622.1.p1, GFFY01028425.1.p1, GFFY01030446.1.p1, GFFY01049516.1.p1, PSME_13938, PSME_24668, PSME_30730, PSME_33142, PSME_37255, PSME_40245, PSME_40247	Thoc_c17410_g1_i1.p1, Thoc_c22652_g1_i1.p1, Thoc_c25638_g1_i1.p1, Thoc_c25641_g1_i1.p1, Thoc_c28021_g4_i1.p1, Thoc_c53172_g1_i1.p1	SEGI_03661, SEGI_07023, SEGI_07487, SEGI_08183, SEGI_10924, SEGI_11024, SEGI_12535, SEGI_12864, SEGI_15598, SEGI_16693, SEGI_18712, SEGI_20127, SEGI_21422, SEGI_21890, SEGI_22156, SEGI_22801, SEGI_23464, SEGI_24474, SEGI_25169, SEGI_26373, SEGI_27510, SEGI_30812, SEGI_31272, SEGI_31394, SEGI_32256, SEGI_36303, SEGI_36782, SEGI_39965, SEGI_41143	SESE_011172, SESE_019467, SESE_021055, SESE_025668, SESE_025786, SESE_026389, SESE_027376, SESE_030579, SESE_037070, SESE_037207, SESE_039710, SESE_056067, SESE_056600, SESE_058606, SESE_059328, SESE_060670, SESE_060898, SESE_061272, SESE_061461, SESE_062487, SESE_062731, SESE_063229, SESE_064256, SESE_066010, SESE_066965, SESE_068057, SESE_069531, SESE_073598, SESE_073757, SESE_074180, SESE_0770…
OG0000064	GGJG01000094.1.p1, GGJG01001820.1.p1, GGJG01011416.1.p1, GGJG01014517.1.p1, GGJG01019796.1.p1, GGJG01021762.1.p1, GGJG01022694.1.p1, GGJG01032740.1.p1, GGJG01033983.1.p1	evm_27.model.AmTr_v1.0_scaffold00022.291 pacid=31552528 transcript=evm_27.model.AmTr_v1.0_scaffold00022.291 locus=evm_27.TU.AmTr_v1.0_scaffold00022.291 ID=evm_27.model.AmTr_v1.0_scaffold00022.291.v1.0 annot-version=v1.0, evm_27.model.AmTr_v1.0_scaffold00066.56 pacid=31564131 transcript=evm_27.model.AmTr_v1.0_scaffold00066.56 locus=evm_27.TU.AmTr_v1.0_scaffold00066.56 ID=evm_27.model.AmTr_v1.0_sca…	GBYR01003880.1.p1, GBYR01031453.1.p1, GBYR01036020.1.p1, GBYR01038360.1.p1, GBYR01038365.1.p1, GGBW01020509.1.p1, GGBW01036451.1.p1, Gb_15014, Gb_19219, Gb_20663, Gb_27230, Gb_27755	TnS000072889t01, TnS000199507t05, TnS000741701t01, TnS000824529t02, TnS000829739t02, TnS000948619t01, TnS001032141t01	Megl_c17160_g2_i1.p1, Megl_c21043_g1_i1.p1, Megl_c26257_g4_i1.p1, Megl_c26257_g4_i2.p1, Megl_c27881_g1_i1.p1, Megl_c28482_g1_i1.p1, Megl_c28482_g2_i1.p1, Megl_c28482_g2_i3.p1, Megl_c9407_g1_i1.p1	GCHX01049113.1.p1, GCHX01053579.1.p1, GCHX01053588.1.p1, GCZO01307037.1.p1, gb|GFBZ01006387.1|.p1, gb|GFBZ01025111.1|.p1, gi|830863192|gb|GCZO01312952.1|.p2	GGJJ01001862.1.p1, GGJJ01002177.1.p1, GGJJ01011755.1.p1, GGJJ01014804.1.p1, GGJJ01023672.1.p1, GGJJ01024319.1.p1, GGJJ01025298.1.p1, GGJJ01031261.1.p1, GGJJ01035171.1.p1, GGJJ01042842.1.p1, GGJJ01058537.1.p1	GDQR01009744.1.p1, GDQR01021039.1.p1, GFLL01044484.1.p1, GFLL01056911.1.p1, GFLL01069137.1.p1, GFLL01130973.1.p1, GFLL01133029.1.p1, gb|GFBO01074750.1|.p1	GGJH01002858.1.p1, GGJH01007090.1.p1, GGJH01007940.1.p1, GGJH01018710.1.p1, GGJH01023379.1.p1, GGJH01026038.1.p1, GGJH01031988.1.p1, GGJH01033987.1.p1, GGJH01034729.1.p1	HAMI01004568.1.p1, HAMI01008927.1.p3, HAMI01009179.1.p1, HAMI01009644.1.p1, HAMI01011883.1.p1, HAMI01012678.1.p1, HAMI01031503.1.p1, HAMI01036407.1.p1, HAMI01040118.1.p1	GBLJ01023706.1.p1, GBLJ01026802.1.p1, GBLJ01038335.1.p1	PILA_01759, PILA_02085, PILA_02967, PILA_02968, PILA_02970, PILA_07890, PILA_08874, PILA_09744, PILA_11786, PILA_13925, PILA_16096, PILA_25811, PILA_27118, PILA_37789, PILA_37792, gb|GEUZ01001267.1|.p1, gb|GEUZ01001400.1|.p1, gb|GEUZ01001435.1|.p1, gb|GEUZ01001554.1|.p1, gb|GEUZ01003062.1|.p1, gb|GEUZ01005159.1|.p1, gb|GEUZ01005575.1|.p1, gb|GEUZ01010890.1|.p1, gb|GEUZ01013412.1|.p1, gb|GEUZ01015…	GAQR01004746.1.p1, GAQR01018306.1.p1, GAQR01036405.1.p1, GAQR01037259.1.p1, GAQR01037260.1.p1, GAQR01049041.1.p1	GDQD01000820.1.p1, GDQD01007770.1.p1	GECO01009561.1.p1, GECO01019646.1.p1, GECO01031007.1.p1, GECO01048066.1.p1, GECO01048386.1.p1, GGAU01023578.1.p1, GGAU01024030.1.p1, GGAU01050491.1.p3, GGAU01050782.1.p2	GGJK01002596.1.p1, GGJK01006042.1.p1, GGJK01006379.1.p1, GGJK01007119.1.p1, GGJK01016174.1.p1, GGJK01017347.1.p1, GGJK01020151.1.p1, GGJK01020338.1.p1, GGJK01021506.1.p1, GGJK01038558.1.p1, GGJK01043272.1.p1	1A_I11_VO_L_1_T_205484_226447_1 C_0.000_Length_3038 type=cds; aalen=505_49%_complete-utrpoor; clen=3038; strand=-; offs=2707-1190; evgclass=noclass_okay_match_5A_I14_VO_L_1296_T_7_85 C_0.128_Length_1460_pct_99_99;, 1A_I9_VO_L_8_T_160_218_1 C_0.193_Length_3188 type=cds; aalen=893_84%_complete; clen=3188; strand=+; offs=387-3068; evgclass=main_okay_match_1A_I9_VO_L_8_T_149_218 C_0.175_Length_1590_p…	GFZL01002676.1.p1, GFZL01015683.1.p1, GFZL01026520.1.p1	GAZW02032776.1.p1, GAZW02032777.1.p1, GAZW02032778.1.p1, GAZW02032780.1.p1, GAZW02043861.1.p1, GAZW02072389.1.p1, GAZW02072390.1.p1, GAZW02072398.1.p1, GAZW02075626.1.p1, GAZW02075633.1.p1, GAZW02099769.1.p1, GFFY01005963.1.p1, GFFY01063670.1.p1, GFFY01073375.1.p1, GFFY01086026.1.p1, PSME_01671, PSME_04758, PSME_07682, PSME_11348, PSME_11859, PSME_23012, PSME_23560, PSME_29323, PSME_37774, PSME_4…	Thoc_c25463_g1_i2.p1, Thoc_c25723_g2_i1.p1, Thoc_c26067_g1_i1.p1, Thoc_c26067_g2_i1.p1, Thoc_c28783_g1_i2.p1, Thoc_c28932_g1_i2.p1	SEGI_03020, SEGI_03961, SEGI_05773, SEGI_06588, SEGI_07870, SEGI_09777, SEGI_11356, SEGI_11803, SEGI_12124, SEGI_12391, SEGI_12679, SEGI_12786, SEGI_14521, SEGI_15091, SEGI_15780, SEGI_18588, SEGI_22378, SEGI_22655, SEGI_23174, SEGI_24023, SEGI_24087, SEGI_24098, SEGI_26907, SEGI_27382, SEGI_28617, SEGI_29988, SEGI_31343, SEGI_33758, SEGI_35041, SEGI_38150, SEGI_38343, SEGI_38568, SEGI_38833, SEG…	SESE_008287, SESE_011609, SESE_012692, SESE_026026, SESE_026147, SESE_028415, SESE_028552, SESE_029048, SESE_030088, SESE_030765, SESE_034185, SESE_036328, SESE_036972, SESE_038571, SESE_039094, SESE_042477, SESE_042753, SESE_043341, SESE_056524, SESE_057666, SESE_060782, SESE_061402, SESE_061490, SESE_062557, SESE_062608, SESE_063398, SESE_063451, SESE_063569, SESE_065800, SESE_066356, SESE_0691…
OG0000065	GGJG01002175.1.p1, GGJG01002495.1.p1, GGJG01008713.1.p1, GGJG01012227.1.p3, GGJG01020636.1.p1, GGJG01025527.1.p1, GGJG01028259.1.p1, GGJG01029990.1.p1, GGJG01033693.1.p1, GGJG01040133.1.p1, GGJG01043113.1.p1, GGJG01043355.1.p2, GGJG01044786.1.p1		GGBW01024887.1.p4			GCHX01046725.1.p1, GCHX01447529.1.p1, GCZO01100606.1.p1, GCZO01200957.1.p1, GCZO01208263.1.p2, GCZO01302900.1.p1, gi|830826279|gb|GCZO01349858.1|.p1, gi|830827557|gb|GCZO01348580.1|.p1, gi|830833324|gb|GCZO01342815.1|.p1, gi|830834407|gb|GCZO01341732.1|.p1, gi|830886520|gb|GCZO01293653.1|.p2, gi|830889574|gb|GCZO01290599.1|.p1, gi|830900107|gb|GCZO01280067.1|.p1, gi|830940967|gb|GCZO01239207.1|.p…	GGJJ01000572.1.p2, GGJJ01000599.1.p1, GGJJ01001679.1.p2, GGJJ01006801.1.p1, GGJJ01006933.1.p1, GGJJ01008874.1.p2, GGJJ01013307.1.p1, GGJJ01015453.1.p2, GGJJ01020893.1.p2, GGJJ01022894.1.p1, GGJJ01023388.1.p1, GGJJ01025111.1.p1, GGJJ01027062.1.p1, GGJJ01032732.1.p2, GGJJ01035217.1.p1, GGJJ01036540.1.p1, GGJJ01038346.1.p1, GGJJ01038666.1.p1, GGJJ01047456.1.p1, GGJJ01056230.1.p1	GDQR01006965.1.p2, GDQR01012787.1.p2, GDQR01015047.1.p2, GDQR01020751.1.p1, GFLL01032102.1.p1, GFLL01079780.1.p2, GFLL01096903.1.p1, GFLL01104992.1.p2, GFLL01106446.1.p2, GFLL01106447.1.p1, GFLL01107955.1.p1, GFLL01113813.1.p1, GFLL01118657.1.p1, GFLL01118984.1.p1, GFLL01118986.1.p1, GFLL01124095.1.p2, GFLL01124102.1.p2, GFLL01132408.1.p1, GFLL01132413.1.p1, GFLL01132725.1.p2, gb|GFBO01065584.1|.…	GGJH01004180.1.p1, GGJH01006651.1.p1, GGJH01013113.1.p1, GGJH01015329.1.p2, GGJH01018074.1.p1, GGJH01020564.1.p1, GGJH01020949.1.p1, GGJH01024492.1.p1, GGJH01029497.1.p1, GGJH01030794.1.p1, GGJH01033327.1.p1, GGJH01035613.1.p1, GGJH01047075.1.p2	HAMI01001122.1.p2, HAMI01005737.1.p1, HAMI01006565.1.p1, HAMI01011268.1.p1, HAMI01011885.1.p1, HAMI01013454.1.p1, HAMI01014746.1.p1, HAMI01020607.1.p1, HAMI01022748.1.p2, HAMI01023585.1.p2, HAMI01024849.1.p1, HAMI01025379.1.p1, HAMI01025406.1.p1, HAMI01028592.1.p1	GBLJ01014798.1.p1, GBLJ01017026.1.p1, GBLJ01041988.1.p1, GBLJ01042193.1.p1, gb|GESU01011142.1|.p1, gb|GESU01014305.1|.p1, gb|GESU01018604.1|.p2, gb|GESU01019692.1|.p1	PILA_35066, gb|GEUZ01002889.1|.p1, gb|GEUZ01009275.1|.p1, gb|GEUZ01014682.1|.p1, gb|GEUZ01014863.1|.p1, gb|GEUZ01015907.1|.p1, gb|GEUZ01015970.1|.p1, gb|GEUZ01019286.1|.p1, gb|GEUZ01019864.1|.p1, gb|GEUZ01020354.1|.p1, gb|GEUZ01021061.1|.p1, gb|GEUZ01021091.1|.p1, gb|GEUZ01021512.1|.p1, gb|GEUZ01021883.1|.p1, gb|GEUZ01021899.1|.p1, gb|GEUZ01022200.1|.p1, gb|GEUZ01022219.1|.p1, gb|GEUZ01022226.1|.…	GAQR01001274.1.p2, GAQR01003189.1.p2, GAQR01016840.1.p1, GAQR01023535.1.p1, GAQR01033225.1.p1, GAQR01048236.1.p1, GAQR01057171.1.p1, GFHB01003881.1.p1, GFHB01008980.1.p1, GFHB01035128.1.p1, GFHB01089784.1.p1, GFHB01091210.1.p1, GFHB01095482.1.p1, GFHB01104657.1.p1, GFHB01115792.1.p1, GFHB01120656.1.p1, GFHB01143469.1.p1, GFHB01152988.1.p1, GFHB01154139.1.p1, GFHB01187306.1.p1	GBQX01014147.1.p1, GBQX01020187.1.p2, GBQX01035635.1.p1, GBQX01041855.1.p2, GBQX01042941.1.p1, GBQX01049628.1.p1, GDQD01006854.1.p1	GECO01004809.1.p1, GECO01005629.1.p1, GECO01010120.1.p1, GECO01010895.1.p1, GECO01013737.1.p1, GECO01014423.1.p1, GECO01016378.1.p1, GECO01018468.1.p1, GECO01018654.1.p1, GECO01018670.1.p1, GECO01019061.1.p1, GECO01032423.1.p1, GECO01035363.1.p1, GECO01037307.1.p1, GECO01039045.1.p1, GECO01039049.1.p1, GECO01039374.1.p1, GECO01039550.1.p1, GECO01039899.1.p1, GECO01040301.1.p1, GECO01041644.1.p1, …	GGJK01003777.1.p1, GGJK01011736.1.p2, GGJK01017565.1.p1, GGJK01020093.1.p1, GGJK01021447.1.p1, GGJK01029049.1.p1, GGJK01030804.1.p1, GGJK01031866.1.p2, GGJK01032206.1.p1, GGJK01034445.1.p1, GGJK01035063.1.p1, GGJK01036146.1.p1, GGJK01037454.1.p2, GGJK01041080.1.p1, GGJK01041852.1.p1, GGJK01042940.1.p1, GGJK01044761.1.p1	1A_I11_VO_L_1_T_98021_226447_1 C_0.000_Length_3298 type=cds; aalen=241_22%_complete-utrbad; clen=3298; strand=-; offs=3278-2553; evgclass=main_okay_match_1A_I11_VO_L_1_T_98023_226447 C_0.000_Length_3287_pct_99_100;, 1A_I9_VO_L_1_T_54275_116761_1 C_0.000_Length_1061 type=cds; aalen=199_56%_complete-utrpoor; clen=1061; strand=-; offs=760-161; evgclass=main_okay_match_1A_I9_VO_L_1_T_54273_116761 C_0…	GFZL01000608.1.p2, GFZL01000873.1.p2, GFZL01009179.1.p1, GFZL01009261.1.p1, GFZL01009685.1.p1, GFZL01014715.1.p1, GFZL01016931.1.p1, GFZL01017069.1.p1, GFZL01020244.1.p2, GFZL01020252.1.p1, GFZL01021334.1.p1, GFZL01021490.1.p1, GFZL01023596.1.p1, GFZL01024451.1.p1, GFZL01024658.1.p1, GFZL01024703.1.p1, GFZL01024780.1.p1, GFZL01024786.1.p1, GFZL01025147.1.p2, GFZL01025393.1.p1, GFZL01025431.1.p1, …	GAZW02016463.1.p1, GAZW02017772.1.p1, GAZW02020007.1.p1, GAZW02044414.1.p1, GAZW02047972.1.p1, GAZW02048132.1.p2, GAZW02057657.1.p1, GAZW02082003.1.p2, GFFY01013265.1.p1, GFFY01018650.1.p2, GFFY01020430.1.p2, GFFY01023113.1.p2, GFFY01028841.1.p1, GFFY01039293.1.p1, GFFY01042072.1.p1, GFFY01042461.1.p1, GFFY01043555.1.p1, GFFY01044155.1.p1, GFFY01057090.1.p1, GFFY01060602.1.p1, GFFY01060716.1.p1, …		SEGI_30410
OG0000066	GGJG01005036.1.p1, GGJG01012054.1.p1, GGJG01021651.1.p1, GGJG01026577.1.p1, GGJG01039644.1.p1, GGJG01042288.1.p1, GGJG01042734.1.p1, GGJG01043957.1.p1		GGBW01022702.1.p1, GGBW01036500.1.p1, GGBW01053231.1.p1, Gb_00186, Gb_22272, Gb_29131, Gb_33172		Megl_c42505_g1_i1.p1	GCHX01052169.1.p1, GCHX01053765.1.p1, GCHX01053943.1.p1, GCHX01146906.1.p1, GCHX01150374.1.p1, GCHX01153560.1.p1, GCHX01445626.1.p1, GCHX01451924.1.p1, GCZO01001900.1.p1, GCZO01100697.1.p1, GCZO01206735.1.p1, GCZO01209068.1.p1, GCZO01306685.1.p1, gb|GFBZ01009261.1|.p2, gb|GFBZ01016529.1|.p1, gb|GFBZ01017045.1|.p1, gb|GFBZ01024718.1|.p1, gi|830828698|gb|GCZO01347439.1|.p1, gi|830849518|gb|GCZO0132…	GGJJ01003197.1.p1, GGJJ01004285.1.p1, GGJJ01005889.1.p1, GGJJ01012301.1.p1, GGJJ01024450.1.p1, GGJJ01025310.1.p1, GGJJ01025767.1.p1, GGJJ01026179.1.p1, GGJJ01026543.1.p1, GGJJ01027017.1.p1, GGJJ01027746.1.p1, GGJJ01028799.1.p1, GGJJ01029354.1.p1, GGJJ01031062.1.p1, GGJJ01031316.1.p1, GGJJ01032407.1.p1, GGJJ01032638.1.p1, GGJJ01032870.1.p1, GGJJ01036783.1.p1, GGJJ01036794.1.p1, GGJJ01038580.1.p1, …	GDQR01000220.1.p1, GDQR01001201.1.p1, GDQR01005068.1.p1, GDQR01006022.1.p1, GDQR01008622.1.p1, GDQR01013276.1.p1, GDQR01015176.1.p1, GFLL01002791.1.p1, GFLL01074910.1.p1, GFLL01074912.1.p1, GFLL01095593.1.p1, GFLL01104829.1.p1, GFLL01125415.1.p1, GFLL01125423.1.p1, GFLL01128983.1.p1, GFLL01138299.1.p1, GFLL01139316.1.p1, gb|GFBO01085235.1|.p1, gb|GFBO01087101.1|.p1, gb|GFBO01095092.1|.p1	GGJH01005533.1.p1, GGJH01007352.1.p1, GGJH01020754.1.p1, GGJH01021495.1.p1, GGJH01021520.1.p1, GGJH01030946.1.p1, GGJH01034891.1.p1, GGJH01037877.1.p1, GGJH01044690.1.p1	HAMI01000587.1.p1, HAMI01002464.1.p1, HAMI01005242.1.p1, HAMI01009619.1.p1, HAMI01011325.1.p1, HAMI01012980.1.p1, HAMI01015469.1.p1, HAMI01019797.1.p1, HAMI01032050.1.p1	GBLJ01007732.1.p1, GBLJ01011154.1.p1, GBLJ01015716.1.p1, GBLJ01018832.1.p1, GBLJ01027291.1.p1, GBLJ01032482.1.p1, gb|GESU01021305.1|.p1, gb|GESU01034410.1|.p1, gb|GESU01037331.1|.p1	PILA_00157, PILA_01046, PILA_02475, PILA_03621, PILA_04533, PILA_08006, PILA_08273, PILA_11677, PILA_12875, PILA_14568, PILA_16024, PILA_17353, PILA_20333, PILA_22023, PILA_22273, PILA_26765, PILA_28760, PILA_28762, PILA_33377, PILA_35089, PILA_36704, PILA_36781, PILA_37402, PILA_37593, PILA_37749, PILA_37751, gb|GEUZ01000333.1|.p1, gb|GEUZ01000392.1|.p1, gb|GEUZ01000488.1|.p1, gb|GEUZ01000965.1|…	GAQR01000482.1.p2, GAQR01006598.1.p2, GAQR01016775.1.p1, GAQR01036848.1.p1, GFHB01015794.1.p1, GFHB01041378.1.p1, GFHB01044114.1.p3, GFHB01045643.1.p1, GFHB01061190.1.p1, GFHB01087770.1.p1, GFHB01108479.1.p1, GFHB01142550.1.p1, GFHB01160522.1.p1, GFHB01164805.1.p1, GFHB01185858.1.p1, GFHB01192262.1.p1	GBQX01031767.1.p1, GBQX01042234.1.p1, GBQX01042622.1.p1, GBQX01051991.1.p1, GBQX01052201.1.p1, GBQX01052273.1.p1, GBQX01053946.1.p1	GECO01014189.1.p1, GECO01014482.1.p1, GECO01015570.1.p1, GECO01017866.1.p1, GECO01022862.1.p1, GECO01022863.1.p1, GECO01028833.1.p1, GECO01029793.1.p1, GECO01039742.1.p1, GECO01048012.1.p1, GECO01048483.1.p1, GECO01048711.1.p1, GECO01049862.1.p1, GECO01050399.1.p1, GGAU01003903.1.p1, GGAU01028964.1.p3, GGAU01037571.1.p1, GGAU01039971.1.p1, GGAU01040573.1.p1, GGAU01041032.1.p1, GGAU01041090.1.p1, …	GGJK01004996.1.p1, GGJK01012661.1.p1, GGJK01015854.1.p1, GGJK01018467.1.p1, GGJK01019388.1.p1, GGJK01019501.1.p1, GGJK01020776.1.p1, GGJK01021720.1.p1, GGJK01022424.1.p1, GGJK01023011.1.p1, GGJK01023225.1.p1, GGJK01023594.1.p1, GGJK01030187.1.p1, GGJK01036844.1.p1, GGJK01042230.1.p1, GGJK01043739.1.p1	1A_I9_VO_L_1_T_51997_116761_1 C_0.000_Length_1654 type=cds; aalen=360_65%_complete; clen=1654; strand=-; offs=1590-508; evgclass=main_okay_match_1A_I9_VO_L_1_T_51988_116761 C_0.000_Length_1697_pct_99_90;, 1A_all_VO_L_8677_T_43_59_1 C_0.472_Length_3988 type=cds; aalen=1268_95%_complete; clen=3988; strand=-; offs=3865-59; evgclass=main_okay_match_1A_I11_VO_L_3221_T_79_89 C_0.079_Length_3950_pct_99_…	GFZL01000853.1.p1, GFZL01001056.1.p1, GFZL01001074.1.p1, GFZL01002677.1.p1, GFZL01013131.1.p1, GFZL01019086.1.p1, GFZL01019197.1.p1, GFZL01021265.1.p1, GFZL01024184.1.p1, GFZL01024198.1.p1, GFZL01025694.1.p1, GFZL01026273.1.p1, GFZL01026535.1.p1, GFZL01026901.1.p1, GFZL01026932.1.p1	GAZW02047700.1.p1, GAZW02092907.1.p1, GAZW02093771.1.p1, GAZW02096347.1.p1, GFFY01001111.1.p2, GFFY01001749.1.p1, GFFY01001775.1.p1, GFFY01001880.1.p1, GFFY01002038.1.p1, GFFY01002041.1.p1, GFFY01002092.1.p1, GFFY01002923.1.p1, GFFY01003334.1.p1, GFFY01003566.1.p1, GFFY01003698.1.p1, GFFY01005142.1.p1, GFFY01012596.1.p3, GFFY01016025.1.p1, GFFY01020898.1.p1, GFFY01022435.1.p1, GFFY01034910.1.p1, …	Thoc_c28802_g2_i1.p1, Thoc_c28802_g3_i1.p2	SEGI_03343, SEGI_03847, SEGI_20975, SEGI_34240	SESE_026999, SESE_028995, SESE_032294, SESE_033901, SESE_037202, SESE_037281, SESE_040666, SESE_040984, SESE_049875, SESE_058577, SESE_059055, SESE_070678, SESE_071554, SESE_073937, SESE_077189, SESE_084221, SESE_095283, SESE_099222, SESE_105211, SESE_105802, SESE_106815
OG0000067	GGJG01007212.1.p1, GGJG01009806.1.p1, GGJG01024328.1.p1, GGJG01024985.1.p1	evm_27.model.AmTr_v1.0_scaffold00003.312 pacid=31565751 transcript=evm_27.model.AmTr_v1.0_scaffold00003.312 locus=evm_27.TU.AmTr_v1.0_scaffold00003.312 ID=evm_27.model.AmTr_v1.0_scaffold00003.312.v1.0 annot-version=v1.0, evm_27.model.AmTr_v1.0_scaffold00003.313 pacid=31565456 transcript=evm_27.model.AmTr_v1.0_scaffold00003.313 locus=evm_27.TU.AmTr_v1.0_scaffold00003.313 ID=evm_27.model.AmTr_v1.0_…	GBYR01009424.1.p1, GBYR01029315.1.p1, GBYR01038351.1.p1, GBYR01038786.1.p1, GHLL01232919.1.p1, GHLL01242076.1.p1, GHLL01242082.1.p1, GHLL01279643.1.p1, GHLL01654317.1.p1, Gb_02388, Gb_03761, Gb_05029, Gb_06621, Gb_08093, Gb_08447, Gb_09130, Gb_10196, Gb_10756, Gb_12468, Gb_14807, Gb_15692, Gb_31088, Gb_31182, Gb_36202, Gb_38471		Megl_c15278_g1_i2.p1, Megl_c19962_g1_i2.p1, Megl_c20444_g1_i2.p1, Megl_c20657_g1_i2.p1, Megl_c20782_g1_i1.p1, Megl_c25501_g1_i2.p1, Megl_c46565_g1_i1.p1, Megl_c7990_g1_i1.p3	GCHX01145272.1.p1, GCZO01308334.1.p1, GQ03120_B17.1, PG01r131103s168367680--12778-34916--pseudo--s4--fs, PG01r131103s168571586--46856-40723--pseudo--fs-not, gb|GFBZ01008348.1|.p1, gi|830950163|gb|GCZO01230012.1|.p2, gi|830994377|gb|GCZO01185804.1|.p1, gi|831089108|gb|GCZO01091350.1|.p1, gi|831104530|gb|GCZO01075929.1|.p1, gi|831166544|gb|GCZO01014143.1|.p1	GGJJ01007366.1.p1, GGJJ01007373.1.p1, GGJJ01009980.1.p1, GGJJ01019489.1.p1, GGJJ01022995.1.p1, GGJJ01024440.1.p1, GGJJ01029108.1.p1, GGJJ01036723.1.p2, GGJJ01051789.1.p1	GDQR01000103.1.p1, GDQR01013117.1.p1, GFLL01042994.1.p1, GFLL01051777.1.p1, GFLL01064982.1.p1, GFLL01069092.1.p1, GFLL01091292.1.p1, GFLL01112734.1.p1, gb|GFBO01053330.1|.p1, gb|GFBO01075250.1|.p1	GGJH01002027.1.p1, GGJH01002176.1.p1, GGJH01002177.1.p1, GGJH01019914.1.p1, GGJH01025732.1.p1, GGJH01030805.1.p1, GGJH01035782.1.p1, GGJH01036671.1.p1, GGJH01043725.1.p1	HAMI01001270.1.p1, HAMI01001991.1.p1, HAMI01007392.1.p1, HAMI01019136.1.p1, HAMI01019359.1.p1, HAMI01019388.1.p1, HAMI01030653.1.p1, HAMI01031745.1.p1, HAMI01033132.1.p1, HAMI01035678.1.p1	GBLJ01000024.1.p1, GBLJ01000896.1.p1, GBLJ01003917.1.p1, GBLJ01005052.1.p1, GBLJ01005827.1.p1, GBLJ01023319.1.p1, gb|GESU01009223.1|.p1, gb|GESU01019530.1|.p1	PILA_00171, PILA_02713, PILA_03702, PILA_05021, PILA_06788, PILA_07280, PILA_09205, PILA_09206, PILA_11392, PILA_11924, PILA_11925, PILA_13335, PILA_14802, PILA_15543, PILA_17334, PILA_17895, PILA_19813, PILA_20009, PILA_20384, PILA_20385, PILA_20753, PILA_21913, PILA_21918, PILA_22837, PILA_23621, PILA_25244, PILA_25673, PILA_25679, PILA_26283, PILA_26933, PILA_27271, PILA_29759, PILA_31976, PIL…	GAQR01021731.1.p1, GAQR01025461.1.p1, GAQR01030100.1.p1, GAQR01030872.1.p1, GAQR01048606.1.p1, GFHB01003845.1.p2, GFHB01019364.1.p1, GFHB01043796.1.p1, GFHB01082101.1.p1, GFHB01097844.1.p1, GFHB01137544.1.p1	GBQX01022578.1.p1, GBQX01030465.1.p1, GBQX01035827.1.p1	GECO01004256.1.p1, GECO01010416.1.p1, GECO01018790.1.p1, GECO01021860.1.p1, GECO01022320.1.p1, GECO01026058.1.p1, GECO01031348.1.p1, GECO01032084.1.p1, GECO01040913.1.p1, GECO01043710.1.p1, GGAU01039246.1.p2, GGAU01040519.1.p2	GGJK01001857.1.p1, GGJK01021606.1.p1, GGJK01022658.1.p1, GGJK01027843.1.p1, GGJK01032826.1.p1, GGJK01035318.1.p1	1A_I11_VO_L_1_T_153040_226447_1 C_0.000_Length_1317 type=cds; aalen=356_81%_complete; clen=1317; strand=-; offs=1315-245; evgclass=main_okay_match_1A_I11_VO_L_1_T_153026_226447 C_0.000_Length_1321_pct_99_72;, 1A_I11_VO_L_1_T_172034_226447_1 C_0.000_Length_2640 type=cds; aalen=356_40%_complete-utrbad; clen=2640; strand=-; offs=2443-1373; evgclass=main_okay_match_1A_I11_VO_L_1_T_172062_226447 C_0.0…	GFZL01002701.1.p1, GFZL01012591.1.p1, GFZL01020438.1.p1, GFZL01022429.1.p1, GFZL01023632.1.p1, GFZL01024009.1.p1, GFZL01026890.1.p1, GFZL01027525.1.p1	GFFY01006671.1.p1, GFFY01008589.1.p1, GFFY01038338.1.p1, GFFY01046101.1.p1, GFFY01071831.1.p1, GFFY01087560.1.p1, GFFY01118731.1.p1, PSME_03416, PSME_07241, PSME_07244, PSME_14166, PSME_14167, PSME_14581, PSME_22209, PSME_22727, PSME_26132, PSME_30860, PSME_39080	Thoc_c17202_g1_i1.p1, Thoc_c18949_g1_i1.p1, Thoc_c28636_g2_i3.p1, Thoc_c28936_g1_i1.p1, Thoc_c28936_g1_i5.p2, Thoc_c3807_g1_i1.p1	SEGI_00078, SEGI_00554, SEGI_00581, SEGI_01869, SEGI_02244, SEGI_02803, SEGI_03875, SEGI_04355, SEGI_04717, SEGI_05386, SEGI_05668, SEGI_06799, SEGI_08062, SEGI_09376, SEGI_09640, SEGI_10705, SEGI_11084, SEGI_12954, SEGI_13575, SEGI_14991, SEGI_15210, SEGI_16634, SEGI_18348, SEGI_19945, SEGI_23082, SEGI_23249, SEGI_24807, SEGI_26219, SEGI_31373, SEGI_31501, SEGI_32237, SEGI_34232, SEGI_34752, SEG…	SESE_014239, SESE_023243, SESE_025799, SESE_028267, SESE_031542, SESE_031728, SESE_034920, SESE_035867, SESE_036514, SESE_036909, SESE_037052, SESE_037064, SESE_037914, SESE_038597, SESE_039255, SESE_040338, SESE_041436, SESE_058180, SESE_061165, SESE_064273, SESE_064731, SESE_066381, SESE_068099, SESE_068347, SESE_071346, SESE_077581, SESE_079127, SESE_080705, SESE_084913, SESE_086615, SESE_0882…
[truncated: 35,150 more rows]

## Sheet: Orthogroups Gene Count
Orthogroup	Abba	Amtr	Gibi	Gnmo	Megl	Pagl	Pama	Pial	Piba	Pice	Picn	Pila	Pima	Pimn	Pipt	Pist	Pita	Pnte	Psme	Thoc	SEGI.2_0.peptides.filtered	SESE.2_1.peptides.filtered.v3	Total
OG0000000	112	69	811	75	55	485	323	220	146	164	143	252	231	180	454	174	460	431	410	93	119	236	5643
OG0000001	89	8	41	8	38	205	177	173	115	114	104	402	133	52	289	165	480	163	310	64	123	413	3666
OG0000002	16	0	23	0	2	34	3	53	5	14	20	69	36	16	61	12	387	29	166	3	96	210	1255
OG0000003	31	37	22	4	0	63	55	53	32	28	31	99	62	17	88	44	124	46	127	0	2	10	975
OG0000004	22	12	35	23	10	48	25	27	30	22	7	112	19	17	31	27	106	22	76	12	64	184	931
OG0000005	9	0	90	0	2	97	16	53	12	16	26	56	15	24	46	6	50	31	220	8	24	127	928
OG0000006	19	10	16	36	12	21	20	10	21	18	12	87	23	14	30	23	55	19	69	7	85	236	843
OG0000007	24	1	16	6	19	49	24	35	29	14	21	90	26	10	40	29	65	25	70	17	44	165	819
OG0000008	9	0	73	0	11	141	33	34	10	6	24	4	15	6	32	8	45	24	131	4	34	172	816
OG0000009	21	0	13	4	0	56	41	45	33	35	56	107	48	22	88	35	57	32	91	1	2	1	788
OG0000010	8	0	35	0	6	143	21	39	12	15	28	1	18	6	38	11	57	26	123	8	14	154	763
OG0000011	28	1	20	27	7	25	12	16	17	19	10	63	21	8	23	22	68	21	64	11	76	197	756
OG0000012	1	3	80	0	5	56	9	12	4	8	17	14	7	3	20	2	25	11	147	5	64	244	737
OG0000013	31	2	11	4	17	20	19	25	34	13	29	45	20	6	42	27	89	22	61	18	29	97	661
OG0000014	22	2	12	6	12	30	16	41	21	21	11	56	37	14	48	20	85	33	69	6	19	78	659
OG0000015	20	6	23	9	9	21	18	22	19	11	12	51	15	8	36	15	104	24	50	8	54	109	644
OG0000016	14	1	10	3	9	26	19	40	16	12	16	45	37	5	56	13	65	33	93	6	20	76	615
OG0000017	11	15	45	6	6	19	19	22	17	10	9	65	18	8	29	20	55	25	62	12	41	91	605
OG0000018	11	1	59	1	4	98	15	22	7	8	15	2	13	5	21	4	27	27	84	7	30	141	602
OG0000019	12	4	11	36	6	28	36	54	18	16	17	64	30	3	42	24	52	22	67	6	14	27	589
OG0000020	8	13	35	1	10	18	10	12	6	10	3	38	14	5	36	10	87	26	45	16	49	118	570
OG0000021	19	4	26	2	6	11	11	10	16	14	8	31	18	9	15	17	48	12	35	14	62	179	567
OG0000022	12	0	9	19	7	36	26	33	11	7	7	54	21	8	52	16	72	28	70	7	19	45	559
OG0000023	11	2	30	0	0	60	9	33	8	8	19	6	30	8	59	8	59	34	125	1	2	40	552
OG0000024	39	0	12	19	7	24	21	33	28	14	21	34	22	10	59	16	66	20	41	4	12	45	547
OG0000025	18	3	15	4	6	13	12	12	16	16	12	45	16	2	26	20	60	17	47	4	35	141	540
OG0000026	12	1	4	17	2	24	23	34	16	16	14	46	41	5	44	19	70	33	60	1	8	32	522
OG0000027	11	4	67	8	5	15	12	6	8	9	12	65	25	9	56	13	42	18	31	6	24	70	516
OG0000028	19	8	23	16	3	23	12	12	15	12	4	35	10	6	19	14	43	15	24	4	45	148	510
OG0000029	29	28	28	2	8	25	11	19	31	16	10	49	16	8	26	29	40	23	31	5	19	55	508
OG0000030	3	0	28	0	0	28	3	9	1	0	7	5	6	2	17	2	38	8	31	4	40	266	498
OG0000031	21	2	21	1	2	36	38	23	26	15	28	31	24	15	37	35	47	29	57	0	4	4	496
OG0000032	5	1	40	0	10	24	5	11	4	3	4	79	9	4	13	4	36	10	82	12	28	103	487
OG0000033	7	0	7	0	0	112	13	26	4	2	28	88	9	11	6	3	17	2	79	5	7	59	485
OG0000034	27	0	0	0	0	49	16	96	2	18	16	2	20	22	37	28	20	5	93	0	0	12	463
OG0000035	2	0	18	0	1	14	4	11	4	4	8	7	5	5	11	1	38	10	183	1	16	120	463
OG0000036	2	13	1	0	4	35	7	13	10	6	11	49	9	7	24	5	27	17	45	9	41	122	457
OG0000037	15	13	24	27	10	10	14	14	12	11	7	35	14	9	20	14	31	12	50	11	25	76	454
OG0000038	7	15	21	4	10	36	17	27	9	4	18	38	21	22	35	18	33	18	48	20	9	13	443
OG0000039	7	0	9	0	0	58	8	29	5	11	3	82	11	11	18	5	26	11	126	0	5	12	437
OG0000040	6	0	60	5	10	11	17	47	8	22	21	17	48	4	13	15	5	5	53	20	25	18	430
OG0000041	0	0	0	0	0	27	3	22	3	0	2	76	5	5	15	4	90	0	71	1	25	74	423
OG0000042	3	1	8	0	0	17	2	11	2	3	7	57	16	8	8	4	170	3	66	1	8	23	418
OG0000043	3	0	13	0	0	38	5	16	1	5	6	24	2	1	6	2	18	9	52	3	13	196	413
OG0000044	5	8	16	7	9	14	10	20	4	11	8	29	15	12	41	11	47	29	34	5	3	72	410
OG0000045	3	1	34	0	0	25	2	13	2	6	12	23	4	5	13	0	23	13	72	6	34	103	394
OG0000046	7	0	6	38	11	19	10	13	9	10	17	16	14	12	13	15	24	13	20	19	19	86	391
OG0000047	6	0	1	0	4	18	14	13	9	13	14	49	20	7	28	9	47	24	31	4	26	53	390
OG0000048	14	4	15	8	10	17	11	13	10	13	15	49	13	13	15	12	23	17	19	15	15	62	383
OG0000049	16	0	10	0	3	16	16	4	12	5	4	43	7	3	23	14	46	20	39	8	31	63	383
OG0000050	3	1	25	0	2	19	1	5	0	1	4	2	0	2	5	0	8	2	17	3	46	237	383
OG0000051	8	7	16	2	2	18	8	6	4	9	7	46	13	5	18	10	41	6	37	9	30	80	382
OG0000052	7	20	12	2	2	26	20	18	8	7	15	33	17	12	25	7	46	20	37	4	9	33	380
OG0000053	9	7	14	11	5	12	10	19	10	16	9	28	13	8	14	15	29	11	24	7	23	78	372
OG0000054	9	0	2	0	0	47	16	25	7	0	45	13	30	5	32	24	28	0	89	0	0	0	372
OG0000055	5	11	0	0	0	24	24	32	16	5	19	26	25	7	41	17	42	17	60	0	0	0	371
OG0000056	2	0	40	0	0	46	5	4	0	1	11	9	3	4	20	1	24	15	70	2	11	101	369
OG0000057	2	0	18	0	0	38	5	11	2	2	6	20	2	2	4	0	11	5	72	2	11	155	368
OG0000058	12	36	5	11	4	6	11	8	10	11	8	35	11	5	16	12	25	13	42	2	21	63	367
OG0000059	7	3	10	7	13	20	9	12	8	10	4	33	12	7	10	14	32	8	28	5	32	82	366
OG0000060	12	9	10	4	7	20	13	19	10	9	16	46	18	6	26	14	36	15	45	5	9	15	364
[truncated: 35,157 more rows]

## Sheet: 2 or 3 redwood copy families
OG0000212.fa
[truncated: 297 more rows]
